# Supplementary material for: Astrocytic glycogen aggregates induce ATAD3A oligomerization mediated mitochondrial fragmentation and impede stroke recovery
Source: Research Square preprint supplement (doi:10.21203/rs.3.rs-6650856/v1), 2026-02-03
Supplement: Supplementary file 1 [file 6e374a0663ca3e4f1c3c2e4e.xlsx]

## Sheet: Fig.1
Fig.1b				Fig.1c							Fig.1i
Ratio glycogen spots per HPF				Heatmap of RNA expression for glycogenesis and glycogenolysis-related genes in dissected regions							lpsilateral		Contralateral
Contralateral	Ipsilateral			genes	Normal Area			Glycogen-high lessions			glycogen spots signal	ATAD3A spots signal	glycogen spots signal	ATAD3A spots signal
0.931034	6.10345			CBE1	1.09809	0.91067	1.00438	2.0308	2.51403	1.54757	4	1
1.27586	6.89655			PYGL	1.38511	0.721965	1.05354	1.37593	1.49485	1.25701	4	3	4	17
1.10345	6.27586			SLC37A4	1.17691	0.849685	1.0133	0.360745	0.174343	0.547147	2	2	5	14
0.758621	4.34483			AGL	1.20999	0.82645	1.01822	1.42896	1.90528	0.952638	0	2	5	14
0.931034	5.44828			GSK3B	1.24401	0.803851	1.02393	1.36777	1.8025	0.933033	0	3	1	11
				GAA	1.27456	0.784584	1.02957	1.28113	1.56917	0.993092	0	4	1	4
				PHKA2	1.19748	0.835088	1.01628	0.606657	0.726986	0.486327	4	4	10	2
				PPP1CA	1.32409	0.755236	1.03966	1.28061	1.11729	1.44393	3	2	3	0
				PPP1CB	1.03886	0.962594	1.00073	0.787116	1.15669	0.417544	2	2	3	0
				PPP1CC	1.15269	0.867539	1.01011	3.28543	4.25748	2.31338	3	2	4	14
				PPP1R2	1.24401	0.803851	1.02393	1.03806	1.32869	0.747425	0	3	6	18
				G6PC	1.12885	1.04748	1.08817	0.609481	0.886791	0.332171	4	4	7	10
				PYGB	1.06571	1.0225	1.04411	0.47187	0.450625	0.493116	2	2	9	12
				GYS1	1.08595	1.03405	1.06	1.3406	1.4406	1.2406	2	3	8	16
											0	2	12	14
Fig.1l				Fig.1n							2	1	8	10
Ratio ATAD3A Spots/GFAP area (per cell)				Ratio ATAD3A Spots/GFAP area (per cell)							0	3	3	4
Sham	MCAO			Ast Non-glycogen	Ast Glycogen						0	5	3	10
0.11	0.33			0.01	0.32						2	2	7	8
0.13	0.29			0.01	0.21						0	2	6	10
0.75	0.25			0.02	0.22						0	3	4	16
0.15	0.26			0.03	0.32						0	4	4	15
0.17	0.46			0.04	0.23						3	8	5	3
0.19	0.51			0.05	0.24						4	3	14	18
				0.08	0.25						2	3	4	15
				0.16	0.45						2	3	5	2
				0.18	0.48						0	2	3	4
				0.18	0.56						0	2	4	12
											0	3	15	10
											0	5	2	9
											0	3	3	11
											0	3	12	20
											1	9	8	13
											1	8	4	10
											4	4	5	9
											3	1	1	8
											2	2	16	8
											2	4	4	7
											4	8	6	13
											0	0	8	20
											4	12	8	9
											2	3	4	8
											0	4	4	10
											0	3	3	9
											2	6	4	5
											0	8	0	8
											3	5	1	8
											1	0	0	15
													0	8
Fig.1f				Fig.1g							Fig.1j

## Sheet: Fig.2
Fig.2b						Fig.2e									Fig.2g			Fig.2i
Mitoarea(μm 2)						Fragmentedmitochondriacell /Totalcells(Ref.Ctrl)									Cristaenumber/MitoArea (μm 2）			OCR(pmol/min)
Few glycogen aggregates enriched area	Glycogen aggregates enriched area					vector	GYS1 + shScr	GYS1 + shATAD3A							vector	GYS1 + shScr	GYS1 + shATAD3A	Time (minutes)	Control				GYS1 + shScr				GYS1 + shATAD3A
2.68666	0.057227					1.22813	8.10568	5.7123							13	1	4	1.34628	261.016	348.868	387.68	364.757	177.463	233.008	213.922	210.4	414.714	243.768	298.261	375.526
0.678947	0.049063					0.938368	6.19323	4.83915							12	1	5	8.12501	246.087	337.931	361.018	315.937	171.231	219.572	198.401	195.616	395.439	232.691	281.318	350.962
2.11134	0.085487					1.02515	7.74162	4.43715							8	2	6	14.9139	236.719	326.066	341.507	331.841	166.222	213.246	191.538	187.561	386.2	229.402	276.369	342.531
1.78988	0.080384					0.792704	5.77282	6.00861							9	3	3	21.8601	122.305	229.062	192.119	180.674	79.5019	122.227	100.485	93.9118	205.269	109.485	146.026	187.44
0.567163	0.131959					1.01725	6.22958	3.40863							2	4	4	28.65	97.3039	167.677	156.426	134.085	73.9139	103.464	85.2675	86.9682	141.619	92.9058	107.509	127.48
0.465427	0.429866														4	2	6	35.4518	90.0943	160.699	140.527	126.208	71.8077	95.2182	81.7988	83.3135	112.787	88.2469	94.1861	107.522
0.362984	0.017663														7	0	2	42.4024	227.631	370.969	431.49	378.49	162.076	242.132	179.876	175.523	418.69	161.511	228.722	253.215
0.553896	0.145147														5	0	3	49.2103	275.887	352.61	364.864	268.176	140.965	210.392	150.331	156.76	379.014	151.223	209.16	235.235
0.832807	0.341946														7	0	0	56.0202	300.466	314.213	341.558	236.438	131.184	198.577	140.457	143.57	376.029	149.906	213.335	237.083
0.967199	0.273259														8	1	1	62.9706	73.6755	142.044	99.3789	105.046	54.4507	79.634	67.0017	71.2928	119.219	77.1353	79.7926	89.1893
0.882026	0.849056														9	2	2	69.7844	65.3134	120.222	92.2723	91.9604	53.1977	74.4829	62.051	65.4761	86.2751	68.2685	69.1928	77.273
0.594167	1.30632														9	3	3	76.5447	61.17	106.961	89.5731	87.3616	51.0259	71.2462	58.9629	61.4347	80.6808	64.2419	65.7928	74.083
0.489919	0.017663														0	4	5
0.441563	0.228906	Fig.2h													10	5	6
0.311567	0.131959	Venus/CFP													12	6	7	Fig.2j
0.362984	1.22656	Time (minutes)	Ctrl				N-Myc GYS1 +shScr				N-Myc GYS1 +shATAD3A				13	4	4	OCR(pmol/min)
0.553896	0.085487	0	1.221	1.1322	1.241	1.0322	0.715	0.78	0.75	0.56	0.88	0.96	0.89	0.85	7	1	6	Ctrl				GYS1+ shScr				GYS1 + shATAD3A
1.09303	0.331663	5	1.419	1.3158	1.439	1.2158	0.726	0.792	0.76	0.57	0.88	0.96	0.89	0.85	3	4	7	267.994	345.931	379.304	294.368	144.742	207.033	156.888	158.618	391.244	254.213	217.072	241.844
1.56066	0.145147	10	1.54	1.428	1.56	1.328	0.704	0.768	0.74	0.55	1.034	1.128	1.03	1.004	4	5	8
0.865463	0.292099	15	1.518	1.4076	1.538	1.3076	0.715	0.78	0.75	0.56	0.957	1.044	0.96	0.927	5	1	3
0.738607	0.07065	20	1.738	1.6116	1.758	1.5116	0.726	0.792	0.76	0.57	0.957	1.044	0.96	0.927	6	2	4
0.553896	0.220507	25	2.376	2.2032	2.396	2.1032	0.968	1.056	0.98	0.79	1.133	1.236	1.12	1.103	13	1	5
1.22656	0.158963	30	2.794	2.5908	2.814	2.4908	1.034	1.128	1.04	0.85	1.32	1.44	1.29	1.29	4	2	6
0.292099	0.138474	35	3.212	2.9784	3.232	2.8784	1.21	1.32	1.2	1.01	2.134	2.328	2.03	2.104	5	3	0
1.02019	0.1256	40	3.432	3.1824	3.452	3.0824	1.188	1.296	1.18	0.99	2.44	2.68	2.29	2.41	6	1	3
0.63585	0.085487	45	3.432	3.1824	3.452	3.0824	1.265	1.38	1.25	1.06	2.418	2.656	2.27	2.388	7	1	4
0.580586	0.085487	50	3.454	3.2028	3.474	3.1028	1.331	1.452	1.31	1.12	2.594	2.848	2.43	2.564	12	3	0
		55	3.619	3.3558	3.639	3.2558	1.188	1.296	1.18	0.99	2.814	3.088	2.63	2.784	11	4	2
		60	3.553	3.2946	3.573	3.1946	1.265	1.38	1.25	1.06	2.913	3.196	2.72	2.883	10	1	3
		65	3.773	3.4986	3.793	3.3986	1.166	1.272	1.16	0.97	3.056	3.352	2.85	3.026	7	5	6
		70	3.762	3.4884	3.782	3.3884	1.166	1.272	1.16	0.97	2.935	3.22	2.74	2.905	8	1	7
		75	3.718	3.4476	3.738	3.3476	1.199	1.308	1.19	1	2.979	3.268	2.78	2.949	9	4	4
		80	3.729	3.4578	3.749	3.3578	1.166	1.272	1.16	0.97	3.034	3.328	2.83	3.004	4	1	6
		85	3.839	3.5598	3.859	3.4598	1.221	1.332	1.21	1.02	3.078	3.376	2.87	3.048	7	1	3
		90	3.828	3.5496	3.848	3.4496	1.232	1.344	1.22	1.03	3.089	3.388	2.88	3.059	8	4	5
															9	2	6
		Fig.2c													6	2	7
															7	3	3
															8	1	8
															0	2	2
															1	0	8
															2	0	1
															4	0	2
															7	2	3
															8	3	4
															11	0	5
															14	2	5
															16	5	9
															14	6	9
															11	7	4

## Sheet: Fig.3
Fig.3f											Fig.3o
RLU(relativelightunit)											Ratio HDAC3 and ATAD3A interactional Spots /GFAP area (per cell)
min													Sham	Ast shScr	Ast shHDAC3
0	Full-luc		HDAC3-Cluc		ATAD3A-Nluc		HDAC3-Cluc &ATAD3A-Nluc		Full-luc without luciferin				0.044	0.12	0.156
1.5	375289	443154	731	1159	528	877	673	662	203	138			0.052	0.345	0.12
3	672360	713597	1404	1990	1002	1444	1744	1603	544	442			0.03	0.247	0.11
5	864547	887110	1785	2445	1411	1778	3102	3025	1126	900			0.045	0.236	0.083
6.5	973544	997009	2063	2826	1477	2059	4915	4658	1792	1472			0.87	0.175	0.045
8	1025904	1068803	2218	2981	1577	2197	6891	6523	2536	2064			0.143	0.152	0.08
9.5	1035179	1109136	2255	3164	1676	2358	9063	8534	3230	2694
	987052	1116903	2201	3159	1628	2361	11386	10814	3818	3221
Fig.3b						Fig.3d							Fig.3h						Fig.3i
Fig.3j						Fig.3k							Fig.3l
Fig.3m						Fig.3p							Fig.3q

## Sheet: Fig.4
Fig.4g
OCR(pmol/min)
									ATAD3A KD
Time (minutes)	Ctrl				HDAC3-Flag				Vector				ATAD3A-Myc				HDAC3-Flag				ATAD3A-Myc + HDAC3-Flag				ATAD3AK134Q-Myc + HDAC3-Flag				ATAD3A-Myc + HDAC3-Flag + RGFP966
1.34628	374.199	439.318	371.257	304.443	248.706	236.502	290.973	301.104	322.189	414.122	412.755	337.437	412.005	348.309	407.862	342.518	322.189	414.122	412.755	337.437	169.425	286.307	229.346	117.719	213.784	210.869	229.353	210.225	346.145	527.661	317.398	283.839
8.12501	358.355	418.347	352.723	293.73	231.357	224.858	269.585	273.703	302.376	390.208	385.486	311.28	391.297	325.098	384.673	323.951	302.376	390.208	385.486	311.28	158.534	271.738	213.088	113.036	204.405	199.971	212.667	197.057	327.499	514.635	301.298	271.031
14.9139	348.925	408.531	343.699	285.937	225.699	221.714	258.388	258.671	291.704	377.547	373.35	301.555	380.788	314.079	373.882	313.675	291.704	377.547	373.35	301.555	155.673	266.565	210.835	112.74	196.339	192.39	207.641	186.777	318.876	501.083	293.509	264.086
21.8601	168.865	149.586	157.369	112.388	118.638	109.836	130.385	127.802	153.065	185.941	188.869	133.895	177.22	168.969	191.79	155.581	153.065	185.941	188.869	133.895	70.4832	107.245	87.5616	54.8647	92.601	87.4561	93.1381	86.2877	164.333	307.957	131.173	123.767
28.65	109.457	108.5	112.706	93.7888	88.9963	100.916	101.252	92.7087	110.802	121.128	135.766	115.414	125.135	120.146	123.634	111.003	110.802	121.128	135.766	115.414	67.3751	92.8177	82.6873	53.1226	83.0618	82.184	86.4616	81.1273	122.269	173.447	105.644	98.7118
35.4518	92.8201	107.912	107.076	92.9651	81.6144	96.2592	93.5458	83.788	100.582	116.036	118.819	112.048	110.274	104.853	98.055	96.7871	100.582	116.036	118.819	112.048	66.2106	90.1964	80.3415	51.9856	80.0185	79.9531	83.9096	79.2226	107.579	133.034	99.4575	89.3644
42.4024	290.053	424.023	265.982	202.419	224.448	189.645	216.843	229.832	250.808	261.521	314.009	208.728	314.743	270.576	414.242	286.138	250.808	261.521	314.009	208.728	113.771	214.723	145.173	88.7312	184.533	172.218	186.116	164.44	278.559	535.43	223.483	237.239
49.2103	272.464	387.562	268.575	201.678	172.552	157.449	172.798	169.641	215.94	235.725	259.801	182.916	292.325	249.62	375.065	260.533	215.94	235.725	259.801	182.916	107.981	198.687	142.149	84.9114	156.972	148.982	159.279	142.576	249.5	471.259	215.769	222.84
56.0202	276.167	391.736	274.48	200.965	148.769	137.773	154.443	144.439	203.409	226.501	247.988	169.094	300.471	246.732	354.28	251.075	203.409	226.501	247.988	169.094	105.939	198.307	142.699	82.2187	146.865	136.043	146.604	130.009	249.609	473.868	217.087	218.561
62.9706	71.2961	99.1883	82.1378	72.3009	63.824	69.1174	67.4352	57.5151	73.228	82.1943	86.9379	83.106	100.742	85.456	90.1268	78.8953	73.228	82.1943	86.9379	83.106	56.1755	74.3179	64.1989	42.7364	61.3454	61.7703	66.5079	59.7729	101.403	121.052	86.5891	84.0661
69.7844	63.7915	83.5572	76.8013	67.1101	58.6552	62.8679	63.5263	54.6798	69.1637	76.7638	80.6351	74.6581	80.6886	73.2932	75.5705	67.1037	69.1637	76.7638	80.6351	74.6581	47.6559	68.4505	57.5806	40.6221	58.1259	59.2854	61.975	55.9274	79.9305	103.508	75.6581	67.4889
76.5447	60.6022	80.1905	73.9975	63.6391	57.227	58.363	60.6603	53.1261	66.2787	74.0339	75.855	68.7781	75.3842	69.4469	71.6871	63.7037	66.2787	74.0339	75.855	68.7781	47.1988	65.807	54.6809	39.3133	56.5617	57.5841	58.6305	52.4167	73.0894	99.818	70.5595	62.8163
Fig.4h	Basal																																Maximal
OCR(pmol/min)									ATAD3A KD																																ATAD3A KD
	Ctrl				HDAC3-Flag				vector				ATAD3A-Myc				HDAC3-Flag				ATAD3A-Myc + HDAC3-Flag				ATAD3AK134Q-Myc + HDAC3-Flag				ATAD3A-Myc + HDAC3-Flag + RGFP966				Ctrl				HDAC3-Flag				vector				ATAD3A-Myc				HDAC3-Flag
	374.199	439.318	371.257	304.443	248.706	236.502	290.973	301.103	477.532	450.851	394.456	243.619	412.005	348.309	407.862	342.518	322.189	414.123	412.755	337.437	160.813	127.138	157.434	116.344	213.784	210.869	229.353	210.225	346.145	527.661	317.398	283.839	290.053	424.023	265.983	202.419	224.448	189.645	216.843	229.832	507.105	421.459	278.409	167.977	314.743	270.575	414.242	286.138	250.808
Fig.4i
Relative fragmented mitochondria per cell (Ref.Ctrl)		ATAD3A KD
	Ctrl	HDAC3-Flag	ATAD3A-myc + HDAC3-Flag	ATAD3A K134Q-myc + HDAC3-Flag	ATAD3A-myc + RGFP966 + HDAC3-Flag
	1.35032	1.72612	9.45224	6.48154	2.6505
	0.947052	1.31468	6.62936	4.54585	3.26165
	1.06783	1.73741	7.47482	5.12559	3.67761
	0.858402	3.00441	6.00882	6.12033	2.95634
	0.954717	0.941509	6.68302	4.58264	3.28804
	1.07722	1.77025	7.5405	5.17063	1.50993
	0.954304	1.34007	6.68013	4.98066	3.28662
	0.744332	2.60516	5.21032	4.57279	2.56348
	1.05683	2.6989	7.3978	5.07277	3.73971
	0.989033	3.46161	6.92323	4.74736	3.40623
Fig.4a			Fig.4b						Fig.4c				Fig.4d			Fig.4e				Fig.4f
[truncated: 15 more columns]

## Sheet: Fig.5
Fig.5c					Fig.5f						Fig.5g
Cerebral infarct volume (%)					Fractional anisotropy (FAipsilateral/contralateral)						Time to remove (sec)
sham	MCAO				ATAD3Af/f	ATAD3Af/f; Aldh1l1CreERT	ATAD3Af/f	ATAD3Af/f; Aldh1l1CreERT			Days after MCAO	ATAD3Afl/fl Sham								ATAD3A Ast Het Sham								ATAD3A Ast Het MCAO								ATAD3Afl/fl MCAO
ATAD3Af/f	ATAD3Af/f	ATAD3AAst Het			0.66	0.93	0.68	0.9			Pre	3.14	2.12	5.7	10.31	3.11	3.21	4.56	2.43	4	3.71	2	3.18	4.19	5.22	2.11	3.13	2.98	5.81	3.16	5.32	2.19	3.23	3.53	4.41	3.23	4.11	3.44	2.56	6.03	3	3.31	2.11
0	37.1512	18.0193			0.54	0.78	0.72	0.87			3	2.39	2.33	4.7	3.1	4.3	2.9	2.83	2.33	2.46	3.29	2.28	3.19	11.22	12.12	22.11	3.13	89.29	100.58	135.83	90.12	72.11	93.13	110.23	49.7	210.23	230.7	201.46	270.83	210.33	150.46	233.29	192.28
0	33.6669	13.9095			0.73	0.89	0.63	0.73			5	3.18	3.45	2.22	2.34	4.11	2.34	2.43	3.7	3.41	3.13	3.31	3.18	3.45	2.22	2.34	4.11	103.13	39.81	67.35	82.22	82.34	38.19	40.35	92.22	197.35	272.22	203.21	192.43	200.12	203.41	223.23	203.31
0	27.7055	16.8885			0.65	0.91	0.66	0.77			7	4.32	2.11	3.21	3.33	2.22	2.28	3.55	2.22	3.21	2.56	3.43	7.32	8.01	3.21	3.37	2.32	32.56	40.43	57.01	33.21	43.37	42.32	15.11	33.01	125.11	123.01	100.21	153.55	155.02	123.21	192.56	103.43
0	40.7027	27.3376			0.59	0.74	0.65	0.86			10	2.46	3.09	3.28	6.12	3.19	3.82	3.91	5.23	2.5	2.53	2.23	2.26	3.09	3.2	7.12	3.19	39.83	30.03	41.09	23.2	37.12	10.19	20.09	35.55	80.09	125.78	139.9	93.21	130.23	112.5	102.53	112.23
0	33.9232	15.0707									14	3.01	3.11	4.01	5.28	3.11	4.11	6.12	10.33	2.34	2.43	3.7	3.01	3.11	4.01	5.28	3.11	18.43	18.7	11.01	24.01	15.28	23.11	25.11	17.01	55.11	57.01	68.34	46.12	70.33	72.34	92.43	53.7
											21	3	2.66	3.03	3.43	2.22	2.34	4.11	2.34	2.48	3.35	2.62	3.5	2.36	3.03	3.53	2.22	8.95	9.62	7.66	4.03	21.53	10.22	10.46	13.22	30.66	43.03	52.78	41.11	23.24	52.38	55.33	61.62
											28	2.01	2.03	2.01	2.11	3.28	3.33	8.22	2.28	3.42	2.51	3.23	9.43	1.7	3.41	3.19	3.01	8.81	8.23	9.22	3.41	13.19	4.01	9.23	7.41	29.03	27.01	18.32	28.22	22.28	22.42	15.51	23.33
Fig.5h
Latency to fall (sec)
Days after MCAO	ATAD3Afl/fl Sham								ATAD3A Ast Het Sham								ATAD3A Ast Het MCAO								ATAD3Afl/fl MCAO
Pre	165.45	177.3	158.42	164.43	167.04	159.33	157.35	164.32	153.2	164.43	167.44	157.3	158.45	153.29	164.46	167.24	169.25	160.45	164.32	165.45	177.39	159.42	163.2	164.48	165.33	161.56	160.58	167.43	167.45	177.32	166.45	157.25
3	162.38	163.55	161.43	162.21	165.2	156.35	158.23	158.21	164.31	162.21	145.2	163.55	135.43	130.31	162.28	158.2	152.12	138.18	129.34	147.35	137.23	128.39	128.32	135.22	97.42	95.25	79.11	108.42	153.2	104.43	117.22	105.34
5	135.42	155.53	145.28	164.22	145.32	158.12	160.23	161.23	168.53	154.22	145.32	155.53	145.28	168.53	154.22	145.32	167.27	123.23	110.15	98.27	137.29	127.33	110.35	119.23	129.23	90.34	78.56	115.54	119.19	100.42	108.42	95.22
7	158.42	153.2	164.43	165.34	156.37	147.42	155.25	149.11	167.22	165.34	156.37	153.2	164.45	167.22	165.34	156.37	177.42	95.25	179.11	118.42	113.2	124.43	117.22	105.34	143.13	107.18	107.17	95.22	97.34	115.19	98.43	98.42
10	162.43	191.34	160.24	155.22	144.19	158.15	141.45	161.58	156.23	155.22	144.19	191.34	160.24	156.53	155.22	154.19	125.15	131.45	131.58	92.43	141.34	150.24	126.23	95.22	137.38	129.23	114.35	115.22	99.19	91.34	90.28	96.53
14	148.27	147.29	167.33	149.23	160.39	167.27	159.23	160.15	150.35	149.23	150.39	147.29	167.33	150.35	149.23	150.37	163.37	111.13	120.12	108.21	147.24	124.34	115.32	129.21	133.16	114.26	108.17	109.23	110.39	117.29	127.03	110.3
21	145.54	135.19	140.42	155.22	137.34	159.23	160.34	158.56	148.42	155.22	137.34	135.19	140.43	148.42	155.22	167.36	152.12	138.18	129.34	147.35	137.23	128.39	128.32	135.22	118.23	100.23	103.23	115.34	126.37	133.2	134.45	127.22
28	167.35	157.23	158.33	159.45	158.34	162.12	148.18	149.34	158.38	169.45	158.34	167.23	158.35	176.38	169.45	158.38	158.33	144.37	129.28	150.44	139.22	130.34	133.09	140.22	138.28	136.18	133.29	129.15	118.34	117.43	148.32	146.37
Fig.5i.a								Fig.5j.a	Acquisition days
ATAD3Afl/fl; Sham	ATAD3A Ast Het; Sham	ATAD3Afl/fl; MCAO	ATAD3A Ast Het; MCAO						Non-MCAO																MCAO
0.753993	0.698965	0.35899	0.514955						ATAD3Afl/f								ATAD3A Ast Het								ATAD3A Ast Het								ATAD3Afl/fl
0.536202	0.580311	0.380137	0.454331					1	46.84	54.01	52.33	53.11	44.02	50.24	48.57	59.36	55.99	60.98	57.07	51.59	49.88	47.92	57.68	45.82	53.85	59.26	54.71	47.59	53	51.76	61.6		58.84	50.95	50.3	58.57	46.5	42.71	50.87	54.06
0.738147	0.557038	0.490172	0.441838					2	34.8	34.77	33.64	62.7	44.2	44.22	38.15	50.61	34.11	42.07	38.35	49.54	32.92	41.59	29.52	49.2	45.07	47.16	35.48	55.93	40.51	56.34	42.15		47.12	49	54.11	41.74	45	55.04	42.72	54.38
0.725708	0.465399	0.366278	0.457105					3	18.89	35.16	26.45	23.8	34.75	23.04	30.22	23.42	26.47	36.04	31.56	32.57	37.38	28.84	30.27	36.74	48.02	41.32	34.67	33.03	49.28	37.98	35.09		54.39	45.53	39.2	53.16	45.86	49.04	57.54	49.01
0.507822	0.557038	0.465367	0.54083					4	9.45	24.69	20.41	19.27	12.85	24.94	18.89	23.42	24.09	39.7	45.81	25.79	41.43	34.99	28.57	26.81	32.57	38.84	27.14	35.06	50.16	30.9	45.93		43.01	52.54	49.07	44.4	50.92	31.04	47.11	42.36
0.623985	0.615652	0.278638	0.480174					5	14.74	30.99	24.18	17.39	28.35	19.66	32.94	18.89	16.29	27.82	22.73	27.86	16.63	30.2	17.98	17.64	26.73	36.77	25.91	30.06	46.33	33.39	39.65		40.17	33.83	28.45	32.57	43.26	42.38	39.52	50.9
0.786331	0.409276	0.144821	0.64					6	9.85	22.67	12.47	11.34	20.4	17.82	13.22	20.38	24.77	17.7	20.36	20.72	31.57	24.43	27.83	10.24	24.66	43.81	30.48	33.11	31.97	44.24	37.19		45.53	45.84	32.26	48.42	33.83	44.14	38.1	39.2
0.665455	0.557038	0.314363	0.278638
Fig.5i.b								Fig.5j.b	Time in quandrant (% of tatal time in all quandrants)
ATAD3Afl/fl; Sham	ATAD3A Ast Het; Sham	ATAD3Afl/fl; MCAO	ATAD3A Ast Het; MCAO						Non-MCAO		MCAO			Non-MCAO		MCAO
0.283993	0.228965	-0.11101	0.044955						ATAD3Afl/fl	ATAD3A Ast Het	ATAD3Afl/fl	ATAD3A Ast Het		ATAD3Afl/fl	ATAD3A Ast Het	ATAD3Afl/fl	ATAD3A Ast Het
0.066202	0.110311	-0.08986	-0.01567						64.25	34.19	18.06	30.66		27.4167	57.4767	73.6067	61.0067
0.268147	0.087038	-0.10372	-0.02816						47.46	36.37	19.04	32.484		44.2067	55.2967	72.6267	59.1827
0.255708	-0.0046	-0.00463	-0.0129						45.24	50.89	32.06	29.52		46.4267	40.7767	59.6067	62.1467
0.037822	0.087038	0.020172	0.07083						59.57	36.98	26.57	39.072		32.0967	54.6867	65.0967	52.5947
0.153985	0.145652	-0.19136	0.010174						44.85	41.48	25.54	33.684		46.8167	50.1867	66.1267	57.9827
0.316331	-0.06072	-0.32518	0.17						52.63	40.65	15.1	46.32		39.0367	51.0167	76.5667	45.3467
0.195455	0.087038	-0.15564	-0.19136						37.07	54.88	34.07	43.92		54.5967	36.7867	57.5967	47.7467
									41.24	64.94	23.54			50.4267	26.7267	68.1267

## Sheet: Fig.6
Fig.6c					Fig.6d								Fig.6e																	Fig.6f
Lesion area (mm2)					Freezing time (%)		Hippocampal infarction						ΔF/F (%)						TAM administration after Hippocampal infarction											ΔF/F (%)				TAM administration after Hippocampal infarction							Fig.6g
	Hippocampal infarction before TAM				Sham		ATAD3Afl/fl		ATAD3A Ast Het				Time (s)	Sham					ATAD3Afl/fl					ATAD3A Ast Het						Time (s)	Sham			ATAD3Afl/fl			ATAD3A Ast Het				ΔFMax/F (%)
Sham	ATAD3Afl/fl	ATAD3Afl/Δ; Aldh1l1CreERT			Day7	Day8	Day7	Day8	Day7	Day8			0	-1.63596	0.268362	0.51222	0.0675031	-1.1407	0.890637	0.179189	0.505075	-0.717175	-3.10041	-0.752475	-3.63702	0.899109	-1.90543	-0.4827		0	-1.41108	-2.0379	-0.784252	-2.5074	-3.30671	-1.70808	-0.482695	-1.41368	0.448293			TAM administration after Hippocampal infarction
0	0.67	0.49			47.6857	64.1024	54.6214	64.3333	67.9881	78.969			0.033333	-1.68203	0.267249	0.50808	0.0762646	-1.12508	0.945443	0.139559	0.461564	-0.73233	-3.09933	-0.757856	-3.65184	1.02245	-1.92139	-0.45765		0.0333333	-1.38729	-2.02253	-0.752048	-2.51527	-3.32354	-1.70701	-0.45765	-1.39788	0.482578		Sham	ATAD3Afl/fl	ATAD3A Ast Het
0	0.78	0.6			33.7405	87.2262	44.8333	42.6071	52.9595	90.6738			0.066667	-1.72021	0.265146	0.507843	0.0865505	-1.10764	0.984889	0.0860927	0.402966	-0.754733	-3.10552	-0.768097	-3.66989	1.14816	-1.9467	-0.42417		0.0666667	-1.3711	-2.01374	-0.728454	-2.52517	-3.34016	-1.71018	-0.424166	-1.37514	0.526806		16.1731	5.64259	11.2685
0	0.7	0.98			32.2857	28.6095	29.381	50.0548	48.3143	57.9976			0.1	-1.75046	0.256431	0.513766	0.0929387	-1.09006	1.00787	0.0277497	0.338687	-0.77325	-3.11078	-0.77309	-3.68327	1.26182	-1.96975	-0.38451		0.1	-1.36374	-2.01277	-0.714712	-2.53436	-3.35684	-1.71187	-0.384508	-1.34616	0.577147		17.9291	7.02916	13.8158
0	1.5	0.81			36.2	72.581	54.0929	55.1238	46.2571	47.5738			0.133333	-1.77103	0.243251	0.522839	0.102536	-1.07124	1.00892	-0.0257163	0.264272	-0.786242	-3.11555	-0.764158	-3.69843	1.37344	-1.99663	-0.34341		0.133333	-1.35836	-2.01159	-0.705126	-2.5466	-3.37825	-1.71494	-0.343412	-1.31607	0.629249		21.84	7.87776	11.0045
0	1.4	1.39			56.0714	55.8357	60.2857	35	20.3333	66.831			0.166667	-1.78001	0.229212	0.53311	0.11597	-1.05578	0.985028	-0.0780404	0.192771	-0.798861	-3.12186	-0.755515	-3.71549	1.4789	-2.02706	-0.3047		0.166667	-1.35709	-2.01366	-0.700529	-2.55772	-3.3975	-1.71793	-0.304697	-1.28529	0.675893		22.9348	6.35974	15.6221
					47.8881	62.2786	38.5071	60.331	47.0071	71.3952			0.2	-1.78381	0.206462	0.554591	0.12245	-1.04106	0.946843	-0.137804	0.124802	-0.812367	-3.12545	-0.747468	-3.73434	1.56208	-2.05484	-0.27397		0.2	-1.36161	-2.02182	-0.701407	-2.57613	-3.42045	-1.73181	-0.273975	-1.26266	0.714709		21.5829	6.09915	13.8873
					53.9405	87.9833	29.1452	34.7357					0.233333	-1.77511	0.180885	0.591033	0.11046	-1.02464	0.900939	-0.196256	0.0717277	-0.822613	-3.1296	-0.727727	-3.76081	1.62203	-2.07005	-0.25173		0.233333	-1.36331	-2.02742	-0.699194	-2.5813	-3.43212	-1.73049	-0.251726	-1.24884	0.745391
					42.0217	70.5524							0.266667	-1.75588	0.159165	0.636326	0.0812384	-1.01485	0.857439	-0.266226	0.0253292	-0.833537	-3.13821	-0.695613	-3.78889	1.67559	-2.07266	-0.23573		0.266667	-1.36322	-2.03089	-0.695545	-2.58616	-3.44198	-1.73034	-0.23573	-1.2406	0.769143
													0.3	-1.73024	0.142063	0.667174	0.0406448	-1.00504	0.820354	-0.337868	-0.0156556	-0.852715	-3.15644	-0.659948	-3.81557	1.72337	-2.05811	-0.21576		0.3	-1.3586	-2.03085	-0.686336	-2.59628	-3.45736	-1.7352	-0.215761	-1.22899	0.797467		Fig.6i
													0.333333	-1.7001	0.131736	0.68957	6.71449e-05	-1.00007	0.78037	-0.418336	-0.0486337	-0.877225	-3.18335	-0.622696	-3.83804	1.74133	-2.03195	-0.18493		0.333333	-1.34996	-2.02725	-0.672682	-2.6105	-3.47386	-1.74714	-0.18493	-1.20906	0.8392		Time spent on left paw relative to right paw (%)
													0.366667	-1.67082	0.121721	0.700349	-0.0484732	-0.998054	0.738559	-0.495937	-0.0812059	-0.901487	-3.2086	-0.580345	-3.84546	1.74887	-1.99195	-0.16419		0.366667	-1.34169	-2.02445	-0.658938	-2.62276	-3.48699	-1.75853	-0.164186	-1.20033	0.87196		Days after PTS
													0.4	-1.64504	0.0989737	0.700352	-0.0952116	-0.999363	0.704991	-0.560852	-0.118155	-0.922428	-3.22822	-0.539667	-3.84191	1.74566	-1.9247	-0.15333		0.4	-1.33105	-2.01864	-0.643458	-2.62992	-3.49376	-1.76609	-0.153334	-1.2011	0.894434			Sham					ATAD3A f/f +PTS
													0.433333	-1.61946	0.0767988	0.694658	-0.145215	-0.99484	0.686058	-0.618534	-0.155182	-0.943175	-3.2506	-0.508348	-3.83893	1.74059	-1.85634	-0.14877		0.433333	-1.31697	-2.00889	-0.62505	-2.63671	-3.50104	-1.77239	-0.148766	-1.20489	0.907361		Pre-op	1.20361	-1.97487	-0.182482	-0.597015	2.58706	3.90041	-7.88668	0.772627
													0.466667	-1.60176	0.0597406	0.691023	-0.196235	-0.990936	0.672321	-0.684954	-0.183315	-0.960419	-3.26691	-0.472014	-3.84056	1.73166	-1.78011	-0.15055		0.466667	-1.30231	-1.99932	-0.605298	-2.65122	-3.51461	-1.78782	-0.150555	-1.21258	0.911475		Day 1	0.397614	0.199005	-0.39801	0.695825	-1.29353	23.1949	21.2302	30.8838
													0.5	-1.59229	0.0373736	0.680698	-0.243056	-0.988386	0.660156	-0.754345	-0.21736	-0.981826	-3.27498	-0.43027	-3.84295	1.72562	-1.70305	-0.15235		0.5	-1.28669	-1.9882	-0.585177	-2.6672	-3.52918	-1.80522	-0.152348	-1.21874	0.914045		Day 3	-7.15461	-1.04167	0.090416	0.45208	-0.39761	30.6548	27.3486	30.7269
													0.533333	-1.58412	0.0256516	0.661786	-0.267912	-0.985555	0.647833	-0.821419	-0.256131	-1.00157	-3.28163	-0.38542	-3.85242	1.72263	-1.62649	-0.15149		0.533333	-1.26903	-1.97451	-0.56355	-2.67703	-3.53771	-1.81636	-0.151494	-1.21753	0.914544		Day 7	0.298211	0.695825	-0.397614	0.695825	-0.298211	25.9921	31.5476	25.6073
													0.566667	-1.58319	0.0175938	0.62659	-0.278176	-0.988953	0.629728	-0.889951	-0.312846	-1.01888	-3.28192	-0.342792	-3.86905	1.72094	-1.55349	-0.14775		0.566667	-1.25181	-1.96078	-0.542844	-2.69857	-3.55981	-1.83733	-0.147746	-1.21195	0.916458		Day 14	0.717213	-1.26706	0.298211	-0.32644	0.764818	25.7231	26.8041	23.7996
													0.6	-1.58831	0.0110779	0.581894	-0.288694	-0.994975	0.602827	-0.95776	-0.37253	-1.03514	-3.2865	-0.313652	-3.88458	1.70789	-1.48277	-0.14053		0.6	-1.24061	-1.95327	-0.527962	-2.71895	-3.58155	-1.85636	-0.140527	-1.20137	0.920315		Day 21	0.397614	-0.29821	-0.39761	0.695825	0.198807	21.9207	21.0317	25.7709
													0.633333	-1.59224	0.00333623	0.541633	-0.298566	-1.00312	0.561104	-1.03407	-0.435881	-1.0489	-3.28568	-0.291299	-3.90862	1.69594	-1.42627	-0.1389		0.633333	-1.2287	-1.9442	-0.513193	-2.73622	-3.60002	-1.87242	-0.1389	-1.19198	0.914175
													0.666667	-1.59129	-0.00238972	0.511481	-0.317851	-1.00567	0.512224	-1.09568	-0.497787	-1.06246	-3.27616	-0.2769	-3.94482	1.68207	-1.38307	-0.14595		0.666667	-1.22047	-1.93749	-0.503448	-2.74832	-3.61584	-1.8808	-0.145953	-1.18611	0.894199
													0.7	-1.58916	-0.00272275	0.499732	-0.341209	-1.00342	0.467056	-1.15731	-0.562919	-1.07501	-3.27074	-0.271156	-3.99115	1.66382	-1.3514	-0.14917		0.7	-1.2136	-1.93182	-0.495385	-2.75482	-3.62761	-1.88202	-0.149175	-1.17214	0.873792
													0.733333	-1.58175	0.0180479	0.497272	-0.381463	-0.99234	0.425203	-1.2187	-0.619862	-1.08273	-3.27448	-0.266672	-4.03744	1.63935	-1.33669	-0.14545		0.733333	-1.20863	-1.92826	-0.489009	-2.76207	-3.64098	-1.88317	-0.145448	-1.1488	0.857908
													0.766667	-1.57251	0.0376751	0.502446	-0.436546	-0.985644	0.374139	-1.28958	-0.688528	-1.09089	-3.27777	-0.264409	-4.08642	1.60333	-1.31481	-0.14811		0.766667	-1.2056	-1.92641	-0.484795	-2.77694	-3.66167	-1.89222	-0.148109	-1.13302	0.836806
													0.8	-1.55956	0.0602148	0.49915	-0.491004	-0.985938	0.323222	-1.34964	-0.755988	-1.10351	-3.28669	-0.270881	-4.12496	1.56765	-1.29923	-0.15157		0.8	-1.20816	-1.93026	-0.486056	-2.78808	-3.68009	-1.89607	-0.151573	-1.11774	0.814598
													0.833333	-1.54432	0.0874168	0.49492	-0.53962	-0.993701	0.278314	-1.4126	-0.82787	-1.11737	-3.29599	-0.28766	-4.15885	1.53235	-1.28386	-0.1696		0.833333	-1.20847	-1.93216	-0.484783	-2.79111	-3.6912	-1.89102	-0.169597	-1.11812	0.778921
													0.866667	-1.53032	0.104271	0.481868	-0.597409	-1.00827	0.230478	-1.47757	-0.904224	-1.12981	-3.30954	-0.312963	-4.18731	1.50144	-1.26655	-0.19253		0.866667	-1.20656	-1.9308	-0.48232	-2.79387	-3.70148	-1.88625	-0.192533	-1.12658	0.741515
													0.9	-1.51065	0.11972	0.470784	-0.650889	-1.02381	0.182462	-1.53515	-0.973647	-1.13919	-3.32724	-0.348652	-4.20177	1.46668	-1.25512	-0.2241		0.9	-1.20282	-1.92786	-0.47777	-2.79847	-3.71083	-1.88611	-0.2241	-1.14437	0.69617
													0.933333	-1.4912	0.125932	0.471281	-0.697519	-1.03861	0.134061	-1.59132	-1.04191	-1.14935	-3.33819	-0.384193	-4.20505	1.43691	-1.23838	-0.25891		0.933333	-1.19866	-1.92507	-0.472258	-2.80544	-3.72359	-1.8873	-0.258908	-1.16724	0.649424
													0.966667	-1.4743	0.133485	0.488541	-0.7509	-1.05451	0.0946826	-1.64141	-1.09778	-1.15507	-3.34207	-0.42532	-4.19816	1.41241	-1.2259	-0.2866		0.966667	-1.19923	-1.92716	-0.471306	-2.81275	-3.73567	-1.88984	-0.286603	-1.18798	0.614775
													1	-1.46099	0.13855	0.509522	-0.798928	-1.07643	0.0651018	-1.69543	-1.16085	-1.16261	-3.35327	-0.467094	-4.18571	1.41757	-1.2163	-0.31526		1	-1.20413	-1.93452	-0.473746	-2.81854	-3.74364	-1.89343	-0.315261	-1.2129	0.582375
													1.03333	-1.44665	0.135327	0.526515	-0.836633	-1.10329	0.0359607	-1.75239	-1.22349	-1.17047	-3.36577	-0.519277	-4.16986	1.44699	-1.19351	-0.34097		1.03333	-1.21021	-1.94335	-0.477067	-2.83246	-3.75763	-1.9073	-0.340974	-1.238	0.556049
													1.06667	-1.43474	0.123405	0.539293	-0.851198	-1.14008	-0.00253074	-1.79778	-1.2824	-1.17565	-3.38	-0.580951	-4.14888	1.49452	-1.16449	-0.37107		1.06667	-1.21329	-1.94905	-0.477521	-2.84733	-3.77133	-1.92333	-0.371067	-1.26925	0.527117
													1.1	-1.42533	0.11152	0.545464	-0.84806	-1.17852	-0.0445695	-1.83297	-1.3402	-1.17863	-3.39008	-0.647836	-4.11478	1.5538	-1.13651	-0.39657		1.1	-1.21332	-1.95261	-0.474037	-2.85254	-3.77678	-1.92829	-0.396566	-1.29934	0.506209
													1.13333	-1.42085	0.0821594	0.556832	-0.851931	-1.21518	-0.088873	-1.87803	-1.40718	-1.1815	-3.39431	-0.718256	-4.08806	1.6134	-1.10627	-0.42216		1.13333	-1.204	-1.9485	-0.459497	-2.85126	-3.77342	-1.9291	-0.422163	-1.32968	0.485359
													1.16667	-1.41888	0.0566126	0.564471	-0.861703	-1.24404	-0.140504	-1.9084	-1.46725	-1.17737	-3.40512	-0.790961	-4.05956	1.68488	-1.07377	-0.43084		1.16667	-1.19891	-1.94909	-0.44873	-2.85004	-3.76735	-1.93273	-0.430841	-1.3452	0.483516
													1.2	-1.4202	0.0352697	0.572356	-0.877031	-1.27123	-0.190428	-1.93202	-1.52869	-1.16726	-3.41705	-0.867189	-4.0316	1.76732	-1.03026	-0.43919		1.2	-1.19834	-1.95382	-0.44286	-2.84868	-3.76102	-1.93634	-0.43919	-1.36086	0.482484
													1.23333	-1.42718	0.0190513	0.576741	-0.906698	-1.29802	-0.240784	-1.95992	-1.59205	-1.16094	-3.43305	-0.943272	-4.01213	1.87027	-0.964502	-0.44562		1.23333	-1.20696	-1.9667	-0.447226	-2.84746	-3.75535	-1.93958	-0.445619	-1.37305	0.481809
													1.26667	-1.428	0.00902089	0.561288	-0.93978	-1.32499	-0.287066	-1.98267	-1.66433	-1.14296	-3.44907	-1.01778	-3.99951	1.96211	-0.894035	-0.44883		1.26667	-1.2207	-1.98399	-0.457423	-2.84893	-3.75292	-1.94494	-0.448828	-1.38161	0.483955
													1.3	-1.42673	0.00206844	0.531161	-0.968629	-1.34877	-0.34221	-1.99802	-1.74758	-1.11407	-3.4721	-1.09441	-3.97953	2.03382	-0.809119	-0.4677		1.3	-1.2383	-2.00459	-0.472	-2.8417	-3.74307	-1.94034	-0.467696	-1.40341	0.468015
													1.33333	-1.42797	-0.0145783	0.49232	-0.987089	-1.37178	-0.41145	-2.00905	-1.82198	-1.07201	-3.49232	-1.17262	-3.95292	2.08354	-0.71372	-0.48986		1.33333	-1.2531	-2.02255	-0.483643	-2.83101	-3.73114	-1.93087	-0.489858	-1.42903	0.449316
													1.36667	-1.42853	-0.0226017	0.448063	-0.994702	-1.39123	-0.496323	-2.0167	-1.89476	-1.02532	-3.50776	-1.23576	-3.92174	2.11305	-0.631544	-0.51828		1.36667	-1.26982	-2.04275	-0.496901	-2.81325	-3.71424	-1.91226	-0.518283	-1.46198	0.425413
													1.4	-1.43334	-0.0358251	0.390459	-1.00482	-1.40223	-0.586673	-2.03068	-1.96389	-0.984613	-3.51842	-1.29238	-3.89727	2.13286	-0.542974	-0.5545		1.4	-1.29014	-2.06553	-0.514759	-2.79434	-3.69745	-1.89123	-0.554503	-1.50178	0.392775
													1.43333	-1.44033	-0.0445368	0.323886	-1.02147	-1.40994	-0.683416	-2.0486	-2.01977	-0.949241	-3.52466	-1.34662	-3.87945	2.15686	-0.454217	-0.60066		1.43333	-1.31462	-2.09153	-0.537708	-2.77908	-3.68351	-1.87466	-0.600657	-1.55037	0.349051
													1.46667	-1.44344	-0.0477425	0.248402	-1.03363	-1.41009	-0.781064	-2.06467	-2.0595	-0.921069	-3.54166	-1.39582	-3.85824	2.18317	-0.373972	-0.65095		1.46667	-1.34963	-2.12593	-0.573343	-2.76886	-3.67647	-1.86124	-0.650955	-1.60469	0.302776
													1.5	-1.44333	-0.0610764	0.171126	-1.04823	-1.41305	-0.876496	-2.09051	-2.1017	-0.897108	-3.55542	-1.45047	-3.84277	2.20788	-0.301225	-0.70722		1.5	-1.38538	-2.15913	-0.611626	-2.76291	-3.67532	-1.8505	-0.707222	-1.66268	0.248238
													1.53333	-1.43807	-0.0719126	0.0885238	-1.04099	-1.41621	-0.984869	-2.12497	-2.14278	-0.877098	-3.56717	-1.51037	-3.82688	2.21093	-0.249735	-0.76304		1.53333	-1.42213	-2.19415	-0.650108	-2.75345	-3.66915	-1.83774	-0.763042	-1.7209	0.194817
													1.56667	-1.42821	-0.0821002	0.00639884	-1.00993	-1.41935	-1.09527	-2.1621	-2.18142	-0.860522	-3.56832	-1.57215	-3.80846	2.1936	-0.217946	-0.81322		1.56667	-1.453	-2.22477	-0.681215	-2.7463	-3.66669	-1.82591	-0.813217	-1.77349	0.147057
													1.6	-1.42102	-0.10836	-0.0689142	-0.964462	-1.42427	-1.20979	-2.19161	-2.21426	-0.855457	-3.57004	-1.64187	-3.79127	2.16977	-0.199506	-0.86067		1.6	-1.4779	-2.25032	-0.705491	-2.72978	-3.65542	-1.80414	-0.860671	-1.82382	0.10248
													1.63333	-1.42102	-0.135094	-0.150867	-0.914849	-1.42975	-1.32098	-2.22666	-2.25135	-0.870851	-3.57206	-1.71783	-3.78719	2.14885	-0.198979	-0.89795		1.63333	-1.50272	-2.27604	-0.729397	-2.71648	-3.64897	-1.78398	-0.897947	-1.86691	0.0710153
													1.66667	-1.42873	-0.158982	-0.236398	-0.866017	-1.43055	-1.42414	-2.25782	-2.2947	-0.900689	-3.57587	-1.79801	-3.78593	2.13818	-0.203895	-0.93027		1.66667	-1.53022	-2.30443	-0.756003	-2.70254	-3.64203	-1.76304	-0.930268	-1.90467	0.0441318
													1.7	-1.44335	-0.196473	-0.317379	-0.839646	-1.42925	-1.51942	-2.27657	-2.34053	-0.940634	-3.58019	-1.88674	-3.77928	2.12145	-0.20773	-0.96171		1.7	-1.55259	-2.32724	-0.777937	-2.68634	-3.63285	-1.73983	-0.961707	-1.94182	0.0184091
													1.73333	-1.45607	-0.236182	-0.392979	-0.820311	-1.43175	-1.60549	-2.29412	-2.3829	-0.983835	-3.58803	-1.97402	-3.76226	2.10324	-0.221126	-0.99065		1.73333	-1.57532	-2.35135	-0.79929	-2.67551	-3.62967	-1.72135	-0.990653	-1.97777	-0.0035322
													1.76667	-1.47296	-0.269457	-0.462561	-0.790736	-1.43412	-1.68879	-2.30801	-2.41989	-1.02738	-3.60108	-2.05336	-3.73923	2.06835	-0.247303	-1.01384		1.76667	-1.59591	-2.37412	-0.817701	-2.66004	-3.62128	-1.69879	-1.01384	-2.00762	-0.0200645
													1.8	-1.49065	-0.301443	-0.528857	-0.752354	-1.43703	-1.77226	-2.31186	-2.46398	-1.07051	-3.60478	-2.13065	-3.70537	2.02406	-0.266021	-1.03443		1.8	-1.60763	-2.38882	-0.826445	-2.64632	-3.61417	-1.67848	-1.03443	-2.03492	-0.0339434
													1.83333	-1.51189	-0.324965	-0.589436	-0.702276	-1.43329	-1.85645	-2.30609	-2.50085	-1.11542	-3.60758	-2.19675	-3.66709	1.95758	-0.277507	-1.04858		1.83333	-1.61572	-2.40255	-0.828885	-2.63606	-3.61222	-1.65991	-1.04858	-2.05576	-0.0414125
													1.86667	-1.53921	-0.356354	-0.652146	-0.662763	-1.42392	-1.93022	-2.28985	-2.53595	-1.16395	-3.60176	-2.25386	-3.62925	1.89839	-0.281514	-1.05608		1.86667	-1.61642	-2.40921	-0.823631	-2.62558	-3.61195	-1.63922	-1.05608	-2.0687	-0.0434536
													1.9	-1.57256	-0.396319	-0.710183	-0.632356	-1.41203	-2.00132	-2.26271	-2.56833	-1.21367	-3.59794	-2.30576	-3.58307	1.84276	-0.28008	-1.06946		1.9	-1.61729	-2.41509	-0.819485	-2.60753	-3.60339	-1.61166	-1.06946	-2.08925	-0.0496731
													1.93333	-1.61127	-0.42181	-0.762202	-0.605585	-1.39675	-2.07123	-2.23611	-2.60175	-1.26667	-3.59401	-2.35291	-3.53797	1.79601	-0.267042	-1.07896		1.93333	-1.62038	-2.42175	-0.819019	-2.59109	-3.59353	-1.58865	-1.07896	-2.10589	-0.0520213
													1.96667	-1.64667	-0.454583	-0.797491	-0.566949	-1.38765	-2.13763	-2.21715	-2.63648	-1.31596	-3.59718	-2.38706	-3.49764	1.7562	-0.252959	-1.08314		1.96667	-1.62227	-2.42708	-0.817451	-2.57756	-3.58447	-1.57064	-1.08314	-2.11691	-0.0493771
													2	-1.6736	-0.482252	-0.812116	-0.521587	-1.38353	-2.20299	-2.20059	-2.67505	-1.36007	-3.59719	-2.41599	-3.46332	1.72132	-0.247013	-1.08564		2	-1.62483	-2.43148	-0.818175	-2.57402	-3.58579	-1.56226	-1.08564	-2.12816	-0.0431135
													2.03333	-1.70099	-0.499353	-0.826847	-0.468652	-1.38437	-2.26453	-2.19128	-2.71445	-1.40075	-3.59225	-2.44265	-3.44304	1.69012	-0.243805	-1.07905		2.03333	-1.63204	-2.43944	-0.824633	-2.56041	-3.57742	-1.54339	-1.07905	-2.13088	-0.0272112
													2.06667	-1.73095	-0.513783	-0.838868	-0.417106	-1.38276	-2.33168	-2.1894	-2.75995	-1.43673	-3.57712	-2.46298	-3.43439	1.67188	-0.239791	-1.06574		2.06667	-1.63465	-2.44178	-0.827511	-2.53216	-3.55469	-1.50963	-1.06574	-2.12653	-0.00495046
													2.1	-1.75547	-0.537529	-0.843578	-0.374983	-1.38103	-2.38989	-2.18264	-2.81998	-1.46393	-3.55863	-2.48988	-3.43411	1.67445	-0.221609	-1.05045		2.1	-1.63447	-2.44004	-0.828894	-2.50188	-3.53002	-1.47373	-1.05045	-2.11956	0.0186512
													2.13333	-1.7803	-0.561604	-0.840124	-0.32971	-1.38546	-2.43946	-2.18602	-2.88151	-1.48411	-3.54279	-2.51845	-3.45	1.67366	-0.208738	-1.03031		2.13333	-1.63736	-2.44048	-0.834252	-2.46546	-3.5015	-1.42942	-1.03031	-2.10757	0.0469455
													2.16667	-1.80587	-0.592367	-0.830777	-0.291089	-1.39829	-2.48878	-2.19214	-2.94517	-1.49902	-3.53016	-2.5473	-3.4769	1.67671	-0.211857	-1.0165		2.16667	-1.63828	-2.43788	-0.838673	-2.42165	-3.46611	-1.3772	-1.0165	-2.10186	0.0688696
													2.2	-1.82361	-0.620192	-0.808753	-0.260521	-1.41454	-2.53514	-2.20365	-3.00765	-1.50768	-3.52525	-2.57292	-3.50554	1.68092	-0.224759	-1.00664		2.2	-1.64072	-2.43546	-0.845992	-2.37899	-3.43308	-1.3249	-1.00664	-2.10136	0.0880849
													2.23333	-1.83718	-0.638353	-0.791015	-0.236065	-1.4276	-2.57695	-2.22397	-3.06046	-1.51154	-3.51408	-2.5963	-3.54516	1.68484	-0.242847	-0.98953		2.23333	-1.63843	-2.42844	-0.84841	-2.33249	-3.39801	-1.26697	-0.98953	-2.09205	0.112988
													2.26667	-1.84219	-0.653808	-0.776988	-0.220804	-1.44304	-2.60833	-2.24258	-3.11834	-1.51298	-3.50988	-2.61071	-3.58859	1.68301	-0.279313	-0.9848		2.26667	-1.62991	-2.41639	-0.843433	-2.29073	-3.37188	-1.20957	-0.984797	-2.09357	0.123972
													2.3	-1.84229	-0.663248	-0.773304	-0.219298	-1.45253	-2.64405	-2.25658	-3.17679	-1.51066	-3.49801	-2.62996	-3.62626	1.68054	-0.313257	-0.98714		2.3	-1.6197	-2.40288	-0.836508	-2.24282	-3.34235	-1.1433	-0.987144	-2.09989	0.125606
													2.33333	-1.84338	-0.668411	-0.78786	-0.212573	-1.46187	-2.68304	-2.27209	-3.22912	-1.50528	-3.48512	-2.64597	-3.66696	1.66168	-0.332245	-0.98858		2.33333	-1.60455	-2.38537	-0.823726	-2.18972	-3.30668	-1.07277	-0.988576	-2.10578	0.128626
													2.36667	-1.8446	-0.674869	-0.810486	-0.193565	-1.47393	-2.72328	-2.28895	-3.28493	-1.4989	-3.46904	-2.65968	-3.70563	1.63772	-0.34267	-1.00255		2.36667	-1.59339	-2.37216	-0.814623	-2.15572	-3.28654	-1.0249	-1.00255	-2.12418	0.119073
													2.4	-1.84416	-0.682298	-0.841171	-0.169193	-1.48797	-2.75289	-2.29612	-3.34564	-1.49459	-3.45291	-2.67699	-3.744	1.60768	-0.331593	-1.01822		2.4	-1.5903	-2.36633	-0.814267	-2.13341	-3.27711	-0.989704	-1.01822	-2.1435	0.107061
													2.43333	-1.84666	-0.689971	-0.87976	-0.145665	-1.49875	-2.78242	-2.30636	-3.39934	-1.49574	-3.43961	-2.68685	-3.77022	1.57255	-0.308056	-1.033		2.43333	-1.59026	-2.36329	-0.817232	-2.12048	-3.27755	-0.963405	-1.033	-2.16343	0.0974357
													2.46667	-1.8476	-0.695198	-0.92522	-0.142974	-1.50903	-2.81637	-2.3188	-3.46123	-1.49953	-3.42638	-2.69846	-3.79552	1.55095	-0.26323	-1.05301		2.46667	-1.58677	-2.35658	-0.816955	-2.10842	-3.27805	-0.938795	-1.05301	-2.18872	0.0826989
													2.5	-1.84521	-0.698997	-0.974607	-0.148083	-1.51731	-2.84827	-2.34007	-3.52579	-1.50024	-3.41218	-2.71499	-3.80915	1.53093	-0.194506	-1.06897		2.5	-1.58717	-2.35367	-0.820668	-2.0961	-3.27485	-0.917362	-1.06897	-2.21088	0.0729377
													2.53333	-1.84521	-0.702622	-1.02709	-0.155105	-1.52226	-2.88033	-2.36044	-3.59142	-1.50223	-3.39881	-2.73047	-3.82186	1.518	-0.0905655	-1.08912		2.53333	-1.59045	-2.35453	-0.826369	-2.08503	-3.27365	-0.896412	-1.08912	-2.23948	0.0612462
													2.56667	-1.84517	-0.708647	-1.07323	-0.162529	-1.52647	-2.91655	-2.38654	-3.66774	-1.50275	-3.38932	-2.75152	-3.83217	1.50259	0.0448531	-1.11231		2.56667	-1.60036	-2.36194	-0.838789	-2.08109	-3.2795	-0.882683	-1.11231	-2.27324	0.0486295
													2.6	-1.84772	-0.712232	-1.11773	-0.169554	-1.52656	-2.95962	-2.42123	-3.73301	-1.50114	-3.37246	-2.78211	-3.83658	1.49164	0.207771	-1.13492		2.6	-1.61509	-2.37407	-0.856114	-2.07438	-3.27832	-0.87043	-1.13492	-2.30647	0.0366185
													2.63333	-1.84688	-0.717206	-1.16348	-0.183716	-1.52738	-3.00138	-2.45215	-3.79539	-1.49675	-3.35478	-2.80856	-3.83379	1.47239	0.391449	-1.16517		2.63333	-1.62672	-2.38367	-0.869761	-2.07835	-3.28284	-0.873854	-1.16517	-2.34802	0.0176684
													2.66667	-1.84079	-0.725098	-1.21217	-0.209726	-1.53244	-3.04433	-2.4943	-3.85926	-1.49666	-3.33362	-2.83806	-3.82855	1.45632	0.570867	-1.20293		2.66667	-1.6406	-2.39597	-0.885227	-2.08415	-3.28812	-0.880175	-1.20293	-2.39336	-0.0125028
													2.7	-1.83032	-0.733638	-1.25472	-0.236335	-1.54392	-3.08673	-2.53606	-3.91443	-1.49804	-3.32544	-2.86528	-3.83035	1.44679	0.738667	-1.24236		2.7	-1.65068	-2.40588	-0.895484	-2.09171	-3.29593	-0.887484	-1.24236	-2.43785	-0.0468785
													2.73333	-1.8166	-0.752932	-1.28212	-0.261733	-1.5601	-3.13606	-2.58637	-3.96261	-1.49732	-3.31985	-2.89122	-3.83258	1.43172	0.885702	-1.28826		2.73333	-1.65715	-2.41305	-0.901243	-2.10489	-3.31047	-0.899307	-1.28826	-2.48857	-0.0879576
													2.76667	-1.80494	-0.772662	-1.29601	-0.284341	-1.57936	-3.18173	-2.63593	-4.00131	-1.4961	-3.30418	-2.92413	-3.84971	1.42384	1.01839	-1.33323		2.76667	-1.66622	-2.42213	-0.910315	-2.11454	-3.3204	-0.908668	-1.33323	-2.53596	-0.130488
													2.8	-1.79903	-0.787973	-1.30211	-0.297648	-1.59317	-3.2292	-2.69261	-4.02833	-1.49018	-3.27973	-2.95588	-3.86358	1.41335	1.1177	-1.3845		2.8	-1.68064	-2.43768	-0.92359	-2.1218	-3.32762	-0.915969	-1.3845	-2.58736	-0.181641
													2.83333	-1.79482	-0.810349	-1.30681	-0.31154	-1.61071	-3.27764	-2.76011	-4.05219	-1.48396	-3.24328	-2.99004	-3.87421	1.40705	1.20533	-1.44248		2.83333	-1.68953	-2.44757	-0.931498	-2.1329	-3.34369	-0.922104	-1.44248	-2.64517	-0.239786
													2.86667	-1.79137	-0.833536	-1.30198	-0.320706	-1.63263	-3.32894	-2.83006	-4.07061	-1.47689	-3.20562	-3.03059	-3.87654	1.38669	1.27838	-1.5014		2.86667	-1.69778	-2.45686	-0.938692	-2.15123	-3.3645	-0.937964	-1.5014	-2.70136	-0.301437
													2.9	-1.78918	-0.855863	-1.30191	-0.328425	-1.65941	-3.37806	-2.90082	-4.07478	-1.47355	-3.16703	-3.07154	-3.86047	1.37008	1.32151	-1.56033		2.9	-1.7061	-2.46757	-0.944643	-2.17355	-3.38518	-0.961924	-1.56033	-2.75775	-0.362905
													2.93333	-1.7857	-0.885521	-1.30442	-0.334647	-1.69014	-3.42495	-2.97244	-4.07829	-1.47	-3.12987	-3.11287	-3.83189	1.34863	1.35862	-1.61612		2.93333	-1.71243	-2.47674	-0.948126	-2.19595	-3.40578	-0.986119	-1.61612	-2.81299	-0.419249
													2.96667	-1.79205	-0.920336	-1.29081	-0.341726	-1.72053	-3.46965	-3.04749	-4.07171	-1.47097	-3.09065	-3.15622	-3.79448	1.3211	1.3965	-1.66385		2.96667	-1.71556	-2.4824	-0.948725	-2.21081	-3.42008	-1.00154	-1.66385	-2.85965	-0.468055
													3	-1.80679	-0.95937	-1.26182	-0.360789	-1.74205	-3.50828	-3.12554	-4.06653	-1.46938	-3.05131	-3.19792	-3.74766	1.27979	1.43443	-1.71151		3	-1.71556	-2.48553	-0.945595	-2.22599	-3.43595	-1.01603	-1.71151	-2.90934	-0.513685
													3.03333	-1.82116	-0.99985	-1.22375	-0.388878	-1.75275	-3.55007	-3.20851	-4.06451	-1.46377	-3.00154	-3.24532	-3.68256	1.22135	1.48555	-1.75603		3.03333	-1.71584	-2.48826	-0.943425	-2.2381	-3.44704	-1.02917	-1.75603	-2.95721	-0.554844
													3.06667	-1.83664	-1.01659	-1.1946	-0.43143	-1.75859	-3.59225	-3.28429	-4.06736	-1.45882	-2.9571	-3.29626	-3.59569	1.15294	1.53533	-1.79429		3.06667	-1.72036	-2.49442	-0.9463	-2.24535	-3.45101	-1.03969	-1.79429	-2.99934	-0.589241
													3.1	-1.85318	-1.02611	-1.18729	-0.476717	-1.7639	-3.63974	-3.36362	-4.08192	-1.45949	-2.92642	-3.34442	-3.48972	1.06676	1.56749	-1.82784		3.1	-1.73304	-2.5095	-0.956578	-2.25428	-3.45714	-1.05143	-1.82784	-3.04137	-0.614312
													3.13333	-1.86418	-1.03893	-1.18314	-0.523675	-1.77387	-3.68688	-3.42099	-4.09879	-1.46545	-2.90234	-3.39343	-3.36438	0.981897	1.59352	-1.85255		3.13333	-1.74813	-2.52565	-0.970605	-2.27486	-3.47473	-1.07498	-1.85255	-3.07755	-0.627552
													3.16667	-1.87657	-1.0388	-1.18755	-0.562407	-1.7805	-3.73359	-3.46174	-4.12199	-1.47766	-2.89276	-3.43375	-3.23526	0.877239	1.61065	-1.87904		3.16667	-1.7654	-2.54409	-0.986704	-2.29286	-3.48691	-1.0988	-1.87904	-3.11582	-0.642256
													3.2	-1.89379	-1.0372	-1.2088	-0.584725	-1.7856	-3.7847	-3.49537	-4.16101	-1.49792	-2.87695	-3.47119	-3.11282	0.766327	1.61105	-1.90597		3.2	-1.78074	-2.56035	-1.00114	-2.3094	-3.49913	-1.11967	-1.90597	-3.15811	-0.653836
													3.23333	-1.90671	-1.03283	-1.2314	-0.593726	-1.79145	-3.83218	-3.51694	-4.21087	-1.5136	-2.86516	-3.5045	-3.00683	0.642198	1.61201	-1.935		3.23333	-1.79799	-2.57781	-1.01817	-2.32292	-3.51188	-1.13396	-1.935	-3.20181	-0.668185
													3.26667	-1.91811	-1.02695	-1.26109	-0.597999	-1.79781	-3.87948	-3.54371	-4.26341	-1.53437	-2.85307	-3.53086	-2.90902	0.524654	1.59255	-1.97016		3.26667	-1.82101	-2.60057	-1.04145	-2.33569	-3.52195	-1.14942	-1.97016	-3.25066	-0.689671
													3.3	-1.9296	-1.00728	-1.29645	-0.588858	-1.80615	-3.92408	-3.55681	-4.33146	-1.5577	-2.84246	-3.55218	-2.82704	0.419346	1.54791	-2.01156		3.3	-1.85095	-2.62964	-1.07227	-2.35603	-3.54154	-1.17052	-2.01156	-3.30702	-0.716096
													3.33333	-1.93756	-0.985025	-1.33746	-0.579489	-1.82156	-3.96611	-3.56514	-4.39985	-1.58214	-2.8383	-3.57202	-2.75301	0.33022	1.4874	-2.05206		3.33333	-1.88297	-2.66033	-1.10561	-2.37217	-3.55554	-1.18881	-2.05206	-3.35928	-0.744829
													3.36667	-1.9432	-0.954457	-1.39842	-0.579176	-1.8389	-4.00716	-3.5784	-4.46874	-1.60572	-2.84099	-3.58894	-2.68311	0.248555	1.40998	-2.09588		3.36667	-1.91297	-2.68815	-1.13779	-2.38726	-3.56998	-1.20454	-2.09588	-3.41416	-0.777605
													3.4	-1.94569	-0.931065	-1.46131	-0.578792	-1.86072	-4.04858	-3.59218	-4.53503	-1.62678	-2.84591	-3.60775	-2.62969	0.167768	1.32254	-2.14421		3.4	-1.93638	-2.71007	-1.16268	-2.39992	-3.58171	-1.21814	-2.14421	-3.47216	-0.816251
													3.43333	-1.94411	-0.906333	-1.50679	-0.583002	-1.88576	-4.0884	-3.61259	-4.59318	-1.63979	-2.85797	-3.62949	-2.58227	0.077205	1.24139	-2.1947		3.43333	-1.94808	-2.71969	-1.17647	-2.41024	-3.58947	-1.231	-2.1947	-3.52908	-0.860314
													3.46667	-1.9438	-0.871772	-1.54342	-0.585256	-1.91598	-4.12389	-3.65219	-4.64796	-1.65021	-2.87277	-3.65535	-2.54249	-0.02992	1.18176	-2.24759		3.46667	-1.95573	-2.72495	-1.1865	-2.41728	-3.59373	-1.24083	-2.24759	-3.58763	-0.907545
													3.5	-1.95039	-0.837589	-1.57704	-0.589775	-1.94805	-4.14832	-3.68856	-4.69694	-1.66512	-2.88109	-3.68608	-2.50054	-0.11454	1.13969	-2.2985		3.5	-1.9651	-2.73116	-1.19904	-2.43135	-3.6051	-1.2576	-2.2985	-3.6436	-0.953406
													3.53333	-1.96053	-0.802147	-1.60402	-0.609855	-1.98151	-4.16018	-3.73876	-4.72849	-1.68368	-2.88889	-3.72035	-2.46177	-0.18805	1.10911	-2.34012		3.53333	-1.97563	-2.73797	-1.21329	-2.44759	-3.61798	-1.2772	-2.34012	-3.68657	-0.99368
													3.56667	-1.97396	-0.764459	-1.63494	-0.632894	-2.01188	-4.17071	-3.80365	-4.75969	-1.70744	-2.90236	-3.75927	-2.42753	-0.25241	1.08513	-2.37605		3.56667	-1.98309	-2.74148	-1.22469	-2.46031	-3.62802	-1.2926	-2.37605	-3.72401	-1.02809
													3.6	-1.99053	-0.724854	-1.66251	-0.663411	-2.04487	-4.17917	-3.86107	-4.78929	-1.72162	-2.92121	-3.80601	-2.40545	-0.32162	1.06618	-2.39654		3.6	-1.98679	-2.74129	-1.2323	-2.47112	-3.63485	-1.30738	-2.39654	-3.74602	-1.04705
													3.63333	-2.00505	-0.693587	-1.7052	-0.700084	-2.07556	-4.18643	-3.94177	-4.80818	-1.73633	-2.9438	-3.85599	-2.39218	-0.39568	1.05476	-2.40674		3.63333	-1.99003	-2.74079	-1.23927	-2.47325	-3.6324	-1.3141	-2.40674	-3.75685	-1.05663
													3.66667	-2.02316	-0.658313	-1.75721	-0.719735	-2.10401	-4.1917	-4.02161	-4.8292	-1.75098	-2.95881	-3.91276	-2.38526	-0.46993	1.04669	-2.40677		3.66667	-1.99548	-2.74188	-1.24907	-2.4742	-3.63003	-1.31837	-2.40677	-3.75995	-1.0536
													3.7	-2.04738	-0.631003	-1.80147	-0.731945	-2.13268	-4.18882	-4.09501	-4.84752	-1.76842	-2.97379	-3.97076	-2.39074	-0.54356	1.04384	-2.39669		3.7	-2.0053	-2.74794	-1.26265	-2.47674	-3.62849	-1.32499	-2.39669	-3.75414	-1.03924
													3.73333	-2.07557	-0.610984	-1.84633	-0.72412	-2.15575	-4.18013	-4.17484	-4.85824	-1.78673	-2.98356	-4.0233	-2.39015	-0.61794	1.04313	-2.38491		3.73333	-2.01948	-2.75764	-1.28132	-2.47375	-3.62403	-1.32346	-2.38491	-3.74722	-1.02259
													3.76667	-2.10515	-0.600419	-1.90836	-0.700758	-2.17996	-4.17135	-4.25078	-4.87542	-1.81037	-2.99278	-4.0741	-2.39679	-0.68125	1.02816	-2.37253		3.76667	-2.03801	-2.77174	-1.30428	-2.47829	-3.62963	-1.32695	-2.37253	-3.74148	-1.00358
													3.8	-2.135	-0.598088	-1.99002	-0.672124	-2.20147	-4.16354	-4.32164	-4.89279	-1.83739	-2.99973	-4.1166	-2.40644	-0.72927	0.998368	-2.35618		3.8	-2.05992	-2.78994	-1.3299	-2.48368	-3.63749	-1.32988	-2.35618	-3.73036	-0.982007
													3.83333	-2.15349	-0.603932	-2.0724	-0.649947	-2.22018	-4.1626	-4.4009	-4.90333	-1.86147	-3.01243	-4.16159	-2.42446	-0.77683	0.948916	-2.33362		3.83333	-2.08208	-2.80842	-1.35574	-2.48723	-3.64347	-1.33098	-2.33362	-3.71067	-0.956576
													3.86667	-2.16421	-0.61417	-2.15256	-0.640017	-2.23789	-4.1648	-4.47298	-4.92497	-1.88048	-3.02947	-4.20513	-2.44243	-0.83472	0.881074	-2.3091		3.86667	-2.11102	-2.83362	-1.38842	-2.48849	-3.64665	-1.33034	-2.3091	-3.6882	-0.930009
													3.9	-2.17447	-0.635214	-2.2107	-0.648432	-2.25646	-4.16969	-4.53762	-4.94122	-1.89858	-3.04658	-4.24175	-2.46782	-0.89506	0.802576	-2.28915		3.9	-2.14305	-2.86185	-1.42425	-2.49007	-3.64594	-1.3342	-2.28915	-3.6693	-0.909007
													3.93333	-2.18198	-0.655779	-2.25229	-0.657486	-2.26505	-4.1725	-4.60664	-4.96529	-1.92387	-3.0634	-4.27776	-2.48908	-0.94686	0.729945	-2.27038		3.93333	-2.17748	-2.89291	-1.46204	-2.49353	-3.64775	-1.3393	-2.27038	-3.65239	-0.888363
													3.96667	-2.18987	-0.675332	-2.27961	-0.661954	-2.27361	-4.17734	-4.66755	-5.0006	-1.95123	-3.07622	-4.31188	-2.50044	-0.98863	0.674341	-2.24493		3.96667	-2.21036	-2.92253	-1.4982	-2.49419	-3.64539	-1.34299	-2.24493	-3.63126	-0.858593
													4	-2.19629	-0.699626	-2.29469	-0.674071	-2.27953	-4.17869	-4.72685	-5.02684	-1.98434	-3.09377	-4.34226	-2.49906	-1.03136	0.635758	-2.22422		4	-2.24318	-2.95274	-1.53363	-2.49292	-3.64049	-1.34536	-2.22422	-3.61598	-0.832465
													4.03333	-2.20076	-0.720454	-2.30135	-0.687424	-2.28357	-4.17861	-4.78666	-5.05407	-2.01846	-3.11464	-4.37347	-2.48629	-1.06243	0.609719	-2.19583		4.03333	-2.2733	-2.98149	-1.5651	-2.48391	-3.62634	-1.34149	-2.19583	-3.5951	-0.796555
													4.06667	-2.20826	-0.734141	-2.29467	-0.722797	-2.29046	-4.17429	-4.84834	-5.08333	-2.05052	-3.13421	-4.40705	-2.47319	-1.08139	0.602713	-2.16586		4.06667	-2.30166	-3.00952	-1.59379	-2.48186	-3.6169	-1.34683	-2.16586	-3.57804	-0.753679
													4.1	-2.2177	-0.739487	-2.28254	-0.7776	-2.29182	-4.17118	-4.90884	-5.10098	-2.08176	-3.14302	-4.44298	-2.45968	-1.0997	0.628857	-2.13731		4.1	-2.32967	-3.03771	-1.62163	-2.47308	-3.59893	-1.34722	-2.13731	-3.56416	-0.710462
													4.13333	-2.22885	-0.745213	-2.26565	-0.84285	-2.28909	-4.16806	-4.96662	-5.12371	-2.11219	-3.15438	-4.48195	-2.45362	-1.1257	0.667438	-2.10418		4.13333	-2.35231	-3.06126	-1.64335	-2.45442	-3.56827	-1.34057	-2.10418	-3.54936	-0.659002
													4.16667	-2.24551	-0.744359	-2.25335	-0.898029	-2.28467	-4.15901	-5.02227	-5.14631	-2.13883	-3.16428	-4.51617	-2.45018	-1.14636	0.727112	-2.07583		4.16667	-2.37796	-3.08846	-1.66745	-2.42144	-3.52262	-1.32027	-2.07583	-3.54496	-0.606696
													4.2	-2.26526	-0.740432	-2.24474	-0.942574	-2.28085	-4.15451	-5.0782	-5.1565	-2.16554	-3.17952	-4.55276	-2.45057	-1.15489	0.782376	-2.05173		4.2	-2.40022	-3.11279	-1.68765	-2.38775	-3.47512	-1.30039	-2.05173	-3.54813	-0.555328
													4.23333	-2.28625	-0.733019	-2.25562	-0.975185	-2.27579	-4.1564	-5.12994	-5.17002	-2.19229	-3.19685	-4.59042	-2.44996	-1.16232	0.826491	-2.02099		4.23333	-2.42162	-3.13601	-1.70722	-2.35649	-3.43088	-1.28209	-2.02099	-3.54903	-0.492946
													4.26667	-2.31369	-0.723214	-2.28046	-1.00253	-2.27762	-4.16497	-5.17134	-5.17294	-2.21724	-3.21323	-4.62868	-2.45379	-1.18482	0.862469	-2.00386		4.26667	-2.44031	-3.15625	-1.72437	-2.32519	-3.38865	-1.26172	-2.00386	-3.56476	-0.442971
													4.3	-2.34624	-0.713053	-2.31393	-1.04265	-2.27677	-4.17393	-5.21197	-5.16769	-2.23514	-3.22158	-4.67522	-2.46432	-1.21308	0.873698	-2.00104		4.3	-2.45755	-3.17523	-1.73986	-2.29967	-3.3544	-1.24495	-2.00104	-3.59085	-0.41123
													4.33333	-2.3807	-0.70148	-2.35868	-1.08578	-2.27547	-4.18823	-5.25151	-5.17024	-2.25148	-3.22795	-4.72498	-2.487	-1.2432	0.865254	-1.99964		4.33333	-2.47085	-3.19049	-1.75121	-2.26933	-3.31613	-1.22252	-1.99964	-3.61596	-0.383327
													4.36667	-2.41445	-0.696697	-2.415	-1.13985	-2.27384	-4.20506	-5.28512	-5.17955	-2.27001	-3.23078	-4.7756	-2.52014	-1.28175	0.842696	-2.01723		4.36667	-2.48045	-3.2011	-1.7598	-2.23532	-3.2772	-1.19344	-2.01723	-3.65638	-0.378088
													4.4	-2.4453	-0.701078	-2.4853	-1.1921	-2.26483	-4.22474	-5.31249	-5.20318	-2.28945	-3.23315	-4.82979	-2.55952	-1.32655	0.815781	-2.0356		4.4	-2.48794	-3.20932	-1.76657	-2.19349	-3.23154	-1.15544	-2.0356	-3.69317	-0.378042
													4.43333	-2.47812	-0.711043	-2.54944	-1.23484	-2.26106	-4.23997	-5.33709	-5.23542	-2.30901	-3.23634	-4.88257	-2.60576	-1.36848	0.784597	-2.05359		4.43333	-2.49362	-3.21542	-1.77182	-2.14951	-3.18373	-1.11529	-2.05359	-3.72609	-0.381093
													4.46667	-2.50812	-0.720661	-2.60173	-1.28781	-2.25925	-4.25075	-5.35842	-5.26257	-2.32795	-3.23787	-4.94291	-2.64478	-1.41175	0.757619	-2.07725		4.46667	-2.50088	-3.22314	-1.77862	-2.10012	-3.1313	-1.06893	-2.07725	-3.76157	-0.392939
													4.5	-2.53697	-0.739604	-2.63532	-1.35596	-2.25435	-4.24837	-5.3857	-5.29641	-2.35269	-3.24511	-5.01293	-2.68128	-1.46888	0.725711	-2.09657		4.5	-2.50302	-3.22512	-1.78091	-2.0581	-3.08825	-1.02796	-2.09657	-3.78842	-0.40471
													4.53333	-2.56344	-0.766024	-2.6574	-1.43843	-2.24993	-4.23812	-5.4087	-5.34451	-2.37809	-3.24826	-5.08021	-2.71169	-1.52906	0.706493	-2.1213		4.53333	-2.50097	-3.22308	-1.77885	-2.00965	-3.0428	-0.9765	-2.1213	-3.81656	-0.426051
													4.56667	-2.59097	-0.803684	-2.66538	-1.54011	-2.24442	-4.21906	-5.43475	-5.39638	-2.40274	-3.24792	-5.15466	-2.7344	-1.58622	0.699919	-2.15455		4.56667	-2.49532	-3.21816	-1.77249	-1.95329	-2.99153	-0.915043	-2.15455	-3.84894	-0.460158
													4.6	-2.61591	-0.853327	-2.65743	-1.6447	-2.23076	-4.19462	-5.46432	-5.46101	-2.4301	-3.24295	-5.22225	-2.75153	-1.63932	0.696623	-2.17701		4.6	-2.48968	-3.21393	-1.76543	-1.89209	-2.93474	-0.849453	-2.17701	-3.86966	-0.48435
													4.63333	-2.63671	-0.918543	-2.64231	-1.7392	-2.21776	-4.164	-5.48407	-5.52998	-2.46498	-3.24404	-5.28214	-2.76306	-1.68909	0.708875	-2.19322		4.63333	-2.48637	-3.21156	-1.76118	-1.82873	-2.87271	-0.784756	-2.19322	-3.88664	-0.499802
													4.66667	-2.6546	-0.989277	-2.61375	-1.84095	-2.19886	-4.1296	-5.49715	-5.59913	-2.50286	-3.25079	-5.33515	-2.77053	-1.74237	0.729718	-2.20718		4.66667	-2.48392	-3.20906	-1.75877	-1.7743	-2.81761	-0.730989	-2.20718	-3.90505	-0.509315
													4.7	-2.6724	-1.06142	-2.57077	-1.93973	-2.17045	-4.08133	-5.51989	-5.6676	-2.53764	-3.24692	-5.38067	-2.78027	-1.79317	0.764949	-2.2047		4.7	-2.4839	-3.20926	-1.75854	-1.72782	-2.77401	-0.681628	-2.2047	-3.90873	-0.500665
													4.73333	-2.68784	-1.13286	-2.51329	-2.03925	-2.13825	-4.03033	-5.53954	-5.72636	-2.57097	-3.24016	-5.42776	-2.80402	-1.83539	0.791875	-2.19821		4.73333	-2.48174	-3.20632	-1.75715	-1.68202	-2.7312	-0.632841	-2.19821	-3.90963	-0.486799
													4.76667	-2.69658	-1.20545	-2.4398	-2.14419	-2.09149	-3.97794	-5.57248	-5.78503	-2.60297	-3.23007	-5.47678	-2.82504	-1.87759	0.806433	-2.18848		4.76667	-2.47718	-3.20107	-1.75329	-1.63073	-2.68368	-0.577779	-2.18848	-3.91014	-0.466817
													4.8	-2.70399	-1.28089	-2.35877	-2.23151	-2.03199	-3.91944	-5.60771	-5.84389	-2.63534	-3.22354	-5.51477	-2.86631	-1.92411	0.827269	-2.16907		4.8	-2.46893	-3.1916	-1.74627	-1.58042	-2.63656	-0.524276	-2.16907	-3.90279	-0.435352
													4.83333	-2.70969	-1.35207	-2.27306	-2.30689	-1.96803	-3.87002	-5.62738	-5.89494	-2.66356	-3.20765	-5.54417	-2.92085	-1.9746	0.84012	-2.13804		4.83333	-2.46293	-3.18399	-1.74187	-1.5215	-2.57888	-0.464112	-2.13804	-3.88793	-0.388141
													4.86667	-2.71497	-1.42093	-2.17117	-2.37153	-1.89156	-3.80214	-5.65073	-5.93354	-2.69252	-3.18324	-5.56942	-2.98739	-2.01968	0.857795	-2.09018		4.86667	-2.45991	-3.17923	-1.74058	-1.44867	-2.50237	-0.394966	-2.09018	-3.86041	-0.319945
													4.9	-2.71839	-1.47973	-2.06514	-2.42165	-1.8055	-3.71851	-5.66833	-5.95977	-2.72464	-3.14902	-5.5798	-3.04921	-2.05769	0.886365	-2.02843		4.9	-2.45543	-3.17282	-1.73805	-1.3546	-2.40401	-0.305198	-2.02843	-3.82149	-0.235365
													4.93333	-2.71904	-1.53233	-1.94951	-2.46499	-1.71358	-3.62269	-5.6796	-5.97146	-2.75718	-3.117	-5.58605	-3.10695	-2.08558	0.931773	-1.96127		4.93333	-2.45138	-3.16596	-1.73679	-1.24717	-2.2927	-0.201631	-1.96127	-3.77863	-0.143915
													4.96667	-2.71724	-1.57965	-1.82173	-2.51156	-1.61043	-3.51903	-5.68875	-5.969	-2.78784	-3.0921	-5.58481	-3.16211	-2.11103	0.970602	-1.88647		4.96667	-2.44385	-3.15628	-1.73142	-1.1233	-2.16768	-0.0789194	-1.88647	-3.72637	-0.0465715
													5	-2.71545	-1.61524	-1.69105	-2.5442	-1.50014	-3.4082	-5.68402	-5.96059	-2.80826	-3.06234	-5.5745	-3.20885	-2.1269	1.0199	-1.81016		5	-2.43179	-3.14281	-1.72077	-0.972649	-2.02232	0.077025	-1.81016	-3.66935	0.0490302
													5.03333	-2.71144	-1.64196	-1.55973	-2.57529	-1.39066	-3.3055	-5.65464	-5.94075	-2.82751	-3.03683	-5.55492	-3.24535	-2.14195	1.06776	-1.72851		5.03333	-2.41756	-3.12559	-1.70952	-0.794304	-1.84978	0.261172	-1.72851	-3.60767	0.150646
													5.06667	-2.70687	-1.66457	-1.42148	-2.59277	-1.28393	-3.20368	-5.61233	-5.91482	-2.84871	-3.00561	-5.51774	-3.26732	-2.16082	1.12852	-1.63772		5.06667	-2.39848	-3.10406	-1.6929	-0.587694	-1.65504	0.479654	-1.63772	-3.53428	0.258849
													5.1	-2.70575	-1.68649	-1.29707	-2.59956	-1.17711	-3.09837	-5.53771	-5.87322	-2.86611	-2.9723	-5.46476	-3.27964	-2.17103	1.19997	-1.54419		5.1	-2.37308	-3.07808	-1.66808	-0.36265	-1.4501	0.724797	-1.54419	-3.45629	0.367902
													5.13333	-2.70219	-1.69669	-1.17761	-2.59671	-1.06968	-2.99635	-5.45096	-5.82784	-2.88288	-2.93007	-5.40099	-3.26619	-2.178	1.27771	-1.45264		5.13333	-2.3399	-3.04603	-1.63377	-0.128603	-1.24894	0.991731	-1.45264	-3.37682	0.471534
													5.16667	-2.69742	-1.70115	-1.06712	-2.58258	-0.963574	-2.89528	-5.35463	-5.77523	-2.89696	-2.88108	-5.32609	-3.23728	-2.17843	1.36357	-1.36477		5.16667	-2.29356	-3.00405	-1.58307	0.11501	-1.04386	1.27388	-1.36477	-3.2957	0.566163
													5.2	-2.69052	-1.69806	-0.978018	-2.55393	-0.858789	-2.81097	-5.2301	-5.71961	-2.90632	-2.83684	-5.24346	-3.17981	-2.17899	1.44948	-1.2678		5.2	-2.23692	-2.9551	-1.51873	0.365134	-0.840835	1.5711	-1.2678	-3.20169	0.666093
													5.23333	-2.68147	-1.6942	-0.892837	-2.5175	-0.753192	-2.73692	-5.08827	-5.67323	-2.91097	-2.79214	-5.15221	-3.11852	-2.17494	1.53317	-1.1561		5.23333	-2.17064	-2.89925	-1.44203	0.614983	-0.639985	1.86995	-1.1561	-3.09297	0.780762
													5.26667	-2.67527	-1.68342	-0.825512	-2.4831	-0.651623	-2.66314	-4.9298	-5.62816	-2.91144	-2.74197	-5.04813	-3.05532	-2.17395	1.61259	-1.03287		5.26667	-2.09508	-2.83682	-1.35334	0.869672	-0.438338	2.17768	-1.03287	-2.97137	0.905636
													5.3	-2.67045	-1.67138	-0.759893	-2.44943	-0.555469	-2.58164	-4.75293	-5.59267	-2.90549	-2.68087	-4.94127	-2.97231	-2.1703	1.68929	-0.89381		5.3	-2.00926	-2.76726	-1.25126	1.13192	-0.230688	2.49454	-0.89381	-2.83439	1.04677
													5.33333	-2.66376	-1.66271	-0.678088	-2.42629	-0.463357	-2.49335	-4.56425	-5.55294	-2.90214	-2.61425	-4.83146	-2.87725	-2.1633	1.76204	-0.74		5.33333	-1.9159	-2.69329	-1.13852	1.38978	-0.0219895	2.80155	-0.739999	-2.68441	1.20442
													5.36667	-2.65776	-1.65331	-0.575293	-2.39361	-0.372695	-2.39266	-4.37012	-5.50547	-2.89925	-2.55279	-4.71979	-2.76471	-2.15094	1.82936	-0.5835		5.36667	-1.813	-2.61376	-1.01223	1.6475	0.186985	3.10801	-0.583495	-2.52992	1.36293
													5.4	-2.65051	-1.63259	-0.451458	-2.35466	-0.274789	-2.26758	-4.17314	-5.44534	-2.89348	-2.50105	-4.59433	-2.62962	-2.14048	1.89803	-0.40996		5.4	-1.70515	-2.53247	-0.877817	1.89731	0.387148	3.40748	-0.409962	-2.36283	1.5429
													5.43333	-2.6346	-1.6016	-0.313786	-2.30778	-0.175795	-2.13123	-3.97723	-5.3893	-2.88831	-2.45414	-4.4582	-2.47554	-2.12852	1.9687	-0.21997		5.43333	-1.59405	-2.44815	-0.73995	2.16238	0.601874	3.72288	-0.219969	-2.18253	1.74259
													5.46667	-2.61786	-1.57099	-0.173783	-2.25014	-0.0787765	-1.99094	-3.77907	-5.3317	-2.87754	-2.4017	-4.30678	-2.32212	-2.10815	2.02465	-0.01571		5.46667	-1.48796	-2.36859	-0.607321	2.45748	0.844057	4.0709	-0.0157093	-1.99559	1.96417
													5.5	-2.59805	-1.54226	-0.0280374	-2.17564	0.0256604	-1.85221	-3.58946	-5.26673	-2.86601	-2.35177	-4.13667	-2.15241	-2.08557	2.07018	0.200021		5.5	-1.38291	-2.28823	-0.477588	2.7847	1.11029	4.45911	0.200021	-1.80553	2.20557
													5.53333	-2.57157	-1.50805	0.132295	-2.07945	0.139464	-1.70728	-3.40723	-5.19105	-2.85115	-2.28951	-3.94509	-1.9867	-2.05542	2.12118	0.426513		5.53333	-1.27691	-2.20425	-0.349568	3.1481	1.40506	4.89114	0.426513	-1.60945	2.46247
													5.56667	-2.53572	-1.4654	0.315569	-1.95468	0.263926	-1.55474	-3.23026	-5.10137	-2.83722	-2.22118	-3.74309	-1.81289	-2.02476	2.17996	0.671374		5.56667	-1.17303	-2.11826	-0.227792	3.53129	1.7129	5.34967	0.671374	-1.39577	2.73851
													5.6	-2.48887	-1.41636	0.527452	-1.80498	0.400347	-1.40112	-3.0474	-4.99412	-2.81962	-2.13564	-3.5308	-1.63638	-1.98285	2.25085	0.942519		5.6	-1.0717	-2.03149	-0.111906	3.91703	2.02322	5.81084	0.942519	-1.15884	3.04388
													5.63333	-2.43086	-1.35333	0.756249	-1.6359	0.551328	-1.25657	-2.85027	-4.86749	-2.80176	-2.037	-3.30488	-1.45394	-1.93619	2.34603	1.24087		5.63333	-0.9722	-1.94289	-0.00151391	4.29995	2.33086	6.26904	1.24087	-0.897124	3.37886
													5.66667	-2.36364	-1.28275	0.9932	-1.45335	0.711731	-1.12007	-2.65434	-4.72855	-2.78061	-1.92102	-3.07174	-1.27187	-1.89204	2.44645	1.57394		5.66667	-0.877023	-1.85515	0.101108	4.6808	2.63729	6.72431	1.57394	-0.606189	3.75408
													5.7	-2.28769	-1.20357	1.22639	-1.26517	0.885529	-0.993861	-2.45145	-4.58619	-2.75461	-1.78365	-2.82972	-1.09122	-1.84398	2.55501	1.93625		5.7	-0.784346	-1.7664	0.197706	5.05779	2.943	7.17258	1.93625	-0.286078	4.15857
													5.73333	-2.20088	-1.12433	1.44971	-1.0688	1.05866	-0.891895	-2.22448	-4.44131	-2.72632	-1.61955	-2.57628	-0.91512	-1.77602	2.66526	2.33407		5.73333	-0.695424	-1.67793	0.287085	5.42932	3.2475	7.61114	2.33407	0.0648584	4.60328
													5.76667	-2.10844	-1.0342	1.6913	-0.863007	1.2392	-0.800626	-1.97067	-4.28931	-2.68947	-1.4263	-2.3018	-0.74879	-1.695	2.78629	2.76606		5.76667	-0.60849	-1.59025	0.373273	5.79518	3.55377	8.03659	2.76606	0.445634	5.08649
													5.8	-2.00953	-0.935554	1.93062	-0.650398	1.42539	-0.720082	-1.68315	-4.12252	-2.64625	-1.2107	-2.01751	-0.58627	-1.59806	2.91744	3.22268		5.8	-0.513008	-1.49429	0.46827	6.14828	3.86128	8.43527	3.22268	0.850979	5.59438
													5.83333	-1.89982	-0.817391	2.16924	-0.441197	1.60654	-0.647991	-1.37789	-3.95796	-2.59552	-0.978952	-1.71839	-0.44426	-1.47116	3.06322	3.71316		5.83333	-0.415259	-1.39646	0.565937	6.48423	4.16865	8.79982	3.71316	1.28872	6.1376
													5.86667	-1.78947	-0.683076	2.39869	-0.226762	1.78546	-0.578276	-1.05046	-3.7978	-2.5353	-0.740531	-1.41009	-0.31631	-1.33362	3.22714	4.21835		5.86667	-0.317604	-1.29842	0.663208	6.78557	4.46155	9.1096	4.21836	1.74134	6.69537
													5.9	-1.6787	-0.546557	2.59498	-0.0104627	1.96875	-0.516643	-0.709446	-3.63286	-2.45621	-0.493453	-1.08404	-0.19926	-1.17805	3.40311	4.72543		5.9	-0.216857	-1.19895	0.765238	7.07622	4.76547	9.38698	4.72543	2.20076	7.2501
													5.93333	-1.56704	-0.405728	2.76545	0.207593	2.15317	-0.461187	-0.355501	-3.47351	-2.354	-0.24304	-0.736215	-0.07695	-1.00885	3.59193	5.22924		5.93333	-0.106044	-1.09144	0.879354	7.38121	5.09428	9.66813	5.22924	2.65844	7.80004
													5.96667	-1.45318	-0.258725	2.90774	0.442881	2.33405	-0.406451	-0.00454363	-3.31481	-2.2283	0.00891985	-0.372441	0.026878	-0.82691	3.789	5.7432		5.96667	0.0176486	-0.97176	1.00706	7.70806	5.45315	9.96297	5.7432	3.13005	8.35635
													6	-1.34398	-0.112086	3.02676	0.707949	2.51696	-0.358468	0.363956	-3.15693	-2.07474	0.262901	0.00643046	0.113124	-0.62137	3.98066	6.25504		6	0.154456	-0.839443	1.14835	8.05453	5.83366	10.2754	6.25504	3.60095	8.90913
													6.03333	-1.23514	0.034377	3.13406	0.988103	2.69481	-0.309547	0.752188	-2.99207	-1.89778	0.521478	0.396658	0.190981	-0.40112	4.18445	6.78264		6.03333	0.304095	-0.694495	1.30268	8.41255	6.22384	10.6013	6.78265	4.08181	9.48348
													6.06667	-1.13047	0.183888	3.23648	1.2661	2.87799	-0.259685	1.1364	-2.81474	-1.69676	0.781358	0.795793	0.262235	-0.17642	4.40211	7.28637		6.06667	0.467161	-0.536209	1.47053	8.7751	6.61148	10.9387	7.28637	4.54242	10.0303
													6.1	-1.02988	0.326041	3.32458	1.52861	3.06073	-0.210967	1.50686	-2.62284	-1.48012	1.03624	1.20347	0.333305	0.055205	4.62562	7.7708		6.1	0.640965	-0.367063	1.64899	9.13817	6.99217	11.2842	7.7708	4.9895	10.5521
													6.13333	-0.93302	0.461357	3.42528	1.76755	3.24012	-0.153907	1.86648	-2.42766	-1.24731	1.28811	1.6178	0.411492	0.295913	4.86489	8.25696		6.13333	0.813407	-0.197892	1.82471	9.50059	7.3596	11.6416	8.25696	5.43945	11.0745
													6.16667	-0.843068	0.58894	3.54015	2.0002	3.42497	-0.0860162	2.23991	-2.21479	-0.986782	1.56852	2.04382	0.492935	0.534965	5.14059	8.72631		6.16667	0.991058	-0.0222481	2.00436	9.84265	7.70132	11.984	8.72631	5.87833	11.5743
													6.2	-0.751399	0.714307	3.6733	2.22304	3.61192	-0.0125703	2.61888	-1.99642	-0.697058	1.87536	2.4836	0.578328	0.786627	5.42688	9.19525		6.2	1.17606	0.161435	2.19069	10.1844	8.03881	12.33	9.19525	6.32077	12.0697
													6.23333	-0.65694	0.850904	3.83181	2.44166	3.78914	0.0679335	3.02161	-1.76575	-0.386757	2.21111	2.93145	0.672602	1.05739	5.73897	9.67425		6.23333	1.36036	0.344394	2.37632	10.5138	8.35993	12.6677	9.67425	6.77096	12.5775
													6.26667	-0.560578	0.977234	4.00719	2.65491	3.95941	0.150523	3.42656	-1.52181	-0.07362	2.57137	3.38237	0.766597	1.34815	6.07329	10.166		6.26667	1.54008	0.523591	2.55657	10.8271	8.66384	12.9903	10.166	7.23845	13.0936
													6.3	-0.464604	1.10235	4.18888	2.84847	4.12289	0.234785	3.84257	-1.27345	0.239785	2.94682	3.82849	0.858479	1.65416	6.4542	10.6326		6.3	1.72123	0.702483	2.73997	11.1234	8.9517	13.2951	10.6326	7.68544	13.5797
													6.33333	-0.360358	1.23417	4.37723	3.01975	4.27998	0.331186	4.25048	-1.0025	0.553205	3.32589	4.28399	0.949198	1.97528	6.89516	11.0858		6.33333	1.90427	0.883208	2.92533	11.4111	9.22775	13.5944	11.0858	8.1298	14.0418
													6.36667	-0.242922	1.36983	4.57446	3.18267	4.4302	0.439833	4.62559	-0.727614	0.863453	3.69876	4.75103	1.0396	2.31761	7.37143	11.5092		6.36667	2.08239	1.05894	3.10584	11.6797	9.48574	13.8736	11.5092	8.55203	14.4664
													6.4	-0.115611	1.51064	4.75899	3.3405	4.57137	0.55431	4.99175	-0.472068	1.16998	4.06864	5.2136	1.14221	2.67094	7.86872	11.9295		6.4	2.25844	1.23388	3.283	11.94	9.73463	14.1454	11.9295	8.97602	14.883
													6.43333	0.0262977	1.6629	4.94233	3.50516	4.70514	0.686477	5.36009	-0.212598	1.4789	4.43661	5.6727	1.27006	3.03361	8.3706	12.3543		6.43333	2.43362	1.40968	3.45756	12.1869	9.96684	14.4069	12.3542	9.40455	15.3039
													6.46667	0.183577	1.82096	5.11356	3.67131	4.84271	0.821108	5.71485	0.0456508	1.78938	4.80058	6.13776	1.42122	3.40297	8.85654	12.7635		6.46667	2.61491	1.59253	3.63728	12.4225	10.1867	14.6583	12.7635	9.81974	15.7073
													6.5	0.352006	1.98335	5.26821	3.83087	4.96731	0.957848	6.0604	0.304175	2.08838	5.14404	6.57666	1.58755	3.80039	9.30675	13.1769		6.5	2.79739	1.77625	3.81854	12.6618	10.4021	14.9215	13.1769	10.2433	16.1106
													6.53333	0.52529	2.13957	5.40242	3.97447	5.08379	1.09528	6.38603	0.582422	2.37377	5.47914	6.99498	1.77756	4.23082	9.73205	13.5866		6.53333	2.97573	1.95655	3.99491	12.8927	10.5998	15.1857	13.5866	10.664	16.5092
													6.56667	0.700907	2.29493	5.53085	4.09492	5.19258	1.23354	6.67089	0.85218	2.65612	5.7992	7.39174	1.98881	4.67944	10.1272	13.994		6.56667	3.15839	2.14308	4.17369	13.1175	10.7843	15.4507	13.994	11.084	16.904
													6.6	0.883334	2.45499	5.64367	4.19298	5.29426	1.37	6.94177	1.1153	2.9542	6.10025	7.76016	2.22191	5.12692	10.488	14.377		6.6	3.34754	2.33574	4.35934	13.3245	10.9504	15.6986	14.377	11.4838	17.2702
													6.63333	1.06666	2.6018	5.75803	4.27669	5.38777	1.50081	7.19902	1.37865	3.26876	6.39931	8.12326	2.49476	5.5829	10.7982	14.7551		6.63333	3.52695	2.52051	4.53339	13.5114	11.0967	15.9261	14.7551	11.8759	17.6344
													6.66667	1.24753	2.74723	5.86002	4.35995	5.46962	1.62666	7.44062	1.61525	3.58895	6.70918	8.47445	2.81665	6.02849	11.0657	15.1245		6.66667	3.69584	2.6965	4.69519	13.6662	11.2186	16.1138	15.1245	12.2583	17.9908
													6.7	1.4262	2.89569	5.94875	4.44488	5.54679	1.73878	7.67314	1.84685	3.91717	7.0421	8.82113	3.18067	6.46211	11.2906	15.4946		6.7	3.85976	2.86917	4.85036	13.8038	11.3315	16.2761	15.4946	12.6429	18.3463
													6.73333	1.61254	3.05208	6.03418	4.53197	5.62101	1.84729	7.89188	2.07645	4.24552	7.39209	9.1546	3.57939	6.90969	11.4819	15.8643		6.73333	4.01984	3.03874	5.00094	13.9301	11.4415	16.4186	15.8643	13.0252	18.7035
													6.76667	1.79247	3.18735	6.1214	4.62671	5.68862	1.93774	8.09705	2.28553	4.57236	7.75309	9.47854	4.00852	7.36353	11.657	16.2249		6.76667	4.17202	3.20022	5.14382	14.0552	11.5535	16.5569	16.2249	13.4034	19.0463
													6.8	1.97109	3.31765	6.22309	4.72873	5.74675	2.01682	8.30032	2.48982	4.89193	8.11097	9.78969	4.47312	7.81435	11.8214	16.5826		6.8	4.31397	3.35171	5.27622	14.1716	11.6653	16.678	16.5826	13.7791	19.386
													6.83333	2.15112	3.43082	6.33789	4.83308	5.80379	2.08477	8.48936	2.68642	5.21699	8.48129	10.0907	4.98337	8.24834	11.9813	16.9241		6.83333	4.44822	3.49655	5.3999	14.2775	11.7778	16.7771	16.9241	14.1387	19.7095
													6.86667	2.33294	3.54215	6.47257	4.94663	5.85855	2.13499	8.67379	2.88411	5.54386	8.83996	10.3809	5.51714	8.65982	12.156	17.2453		6.86667	4.58544	3.64313	5.52775	14.3637	11.8808	16.8466	17.2453	14.4785	20.0122
													6.9	2.51751	3.64288	6.60853	5.07	5.9087	2.15973	8.86782	3.08567	5.86693	9.18155	10.6626	6.05895	9.03754	12.3428	17.5503		6.9	4.7133	3.78106	5.64555	14.428	11.9675	16.8884	17.5503	14.8001	20.3004
													6.93333	2.70037	3.74179	6.75412	5.22433	5.95216	2.16619	9.06002	3.2948	6.18227	9.51784	10.9446	6.59988	9.39997	12.5443	17.876		6.93333	4.83091	3.90864	5.75318	14.4806	12.0397	16.9214	17.876	15.135	20.6171
													6.96667	2.88477	3.84258	6.91029	5.39301	5.98916	2.15761	9.23299	3.511	6.48514	9.84317	11.2329	7.11104	9.7378	12.7598	18.2055		6.96667	4.94356	4.03037	5.85676	14.5224	12.0994	16.9454	18.2055	15.4701	20.9409
													7	3.0724	3.93237	7.06561	5.56236	6.02111	2.13133	9.40248	3.7384	6.77677	10.1535	11.5066	7.5927	10.0785	12.9886	18.554		7	5.05088	4.14421	5.95755	14.5642	12.1525	16.976	18.554	15.8133	21.2947
													7.03333	3.25552	4.00411	7.21372	5.72828	6.04799	2.09489	9.59077	3.9766	7.06439	10.4487	11.7552	8.04037	10.432	13.2408	18.8906		7.03333	5.15084	4.24721	6.05447	14.6089	12.2013	17.0165	18.8906	16.14	21.6411
													7.06667	3.42875	4.05414	7.36208	5.87964	6.07011	2.05453	9.79219	4.23326	7.36014	10.7238	11.9952	8.45192	10.8094	13.5393	19.2058		7.06667	5.23526	4.33232	6.1382	14.6468	12.2369	17.0567	19.2058	16.4438	21.9678
													7.1	3.59679	4.11687	7.49405	6.00939	6.08515	2.00825	10.0137	4.49434	7.66618	10.9808	12.219	8.80813	11.2194	13.8794	19.5017		7.1	5.31459	4.41206	6.21712	14.6831	12.2712	17.0949	19.5017	16.7205	22.2829
													7.13333	3.75652	4.17547	7.61264	6.11931	6.09176	1.96241	10.2357	4.76351	7.995	11.2385	12.445	9.11081	11.6677	14.2705	19.7849		7.13333	5.39072	4.48776	6.29367	14.7017	12.2857	17.1178	19.7849	16.9814	22.5885
													7.16667	3.90721	4.24194	7.70879	6.20911	6.09915	1.91851	10.4603	5.04802	8.35261	11.4731	12.6873	9.36825	12.1187	14.7153	20.0452		7.16667	5.46155	4.55785	6.36524	14.7159	12.2927	17.1391	20.0452	17.2139	22.8766
													7.2	4.04977	4.30728	7.77878	6.28577	6.09658	1.88125	10.6805	5.32826	8.73102	11.6993	12.9341	9.57906	12.5449	15.1992	20.297		7.2	5.51998	4.61607	6.42388	14.7399	12.3011	17.1786	20.2971	17.4411	23.153
													7.23333	4.18616	4.37005	7.83739	6.33804	6.08483	1.85921	10.8868	5.6173	9.12632	11.9308	13.1796	9.75779	12.9761	15.6854	20.5227		7.23333	5.57463	4.66972	6.47954	14.7659	12.3116	17.2203	20.5227	17.6496	23.3959
													7.26667	4.31757	4.43329	7.86967	6.35742	6.07001	1.84482	11.0784	5.89428	9.51773	12.1585	13.416	9.91846	13.4062	16.1791	20.7022		7.26667	5.62923	4.7244	6.53406	14.7865	12.3192	17.2538	20.7022	17.8199	23.5846
													7.3	4.44805	4.49792	7.87776	6.35974	6.05326	1.83978	11.2698	6.16034	9.90154	12.3755	13.6191	10.069	13.826	16.6885	20.862		7.3	5.68083	4.777	6.58466	14.7923	12.3162	17.2684	20.862	17.9794	23.7446
													7.33333	4.56624	4.56155	7.87089	6.34414	6.03339	1.85141	11.4338	6.42294	10.2956	12.5758	13.8192	10.2098	14.2226	17.2236	20.9707		7.33333	5.72462	4.82271	6.62653	14.7703	12.2894	17.2511	20.9707	18.1035	23.838
													7.36667	4.68008	4.63076	7.85912	6.32057	6.00647	1.87448	11.5781	6.66571	10.6992	12.7438	14.0148	10.3553	14.583	17.765	21.0803		7.36667	5.76034	4.86277	6.65792	14.7247	12.2388	17.2106	21.0803	18.2303	23.9303
													7.4	4.78485	4.70272	7.84762	6.29774	5.97306	1.89839	11.7107	6.89905	11.1018	12.8857	14.2077	10.4996	14.888	18.2898	21.1832		7.4	5.7939	4.89995	6.68785	14.6649	12.1765	17.1532	21.1832	18.3461	24.0202
													7.43333	4.88084	4.75882	7.82609	6.28053	5.9357	1.92802	11.8248	7.14866	11.4957	13.011	14.4077	10.6449	15.1231	18.7988	21.2743		7.43333	5.82239	4.92999	6.71479	14.5681	12.0782	17.0581	21.2743	18.4535	24.0952
													7.46667	4.96704	4.81169	7.7893	6.28023	5.89571	1.96142	11.9336	7.39248	11.8689	13.127	14.5908	10.7913	15.2999	19.2746	21.3479		7.46667	5.84599	4.95344	6.73854	14.4683	11.9753	16.9614	21.3479	18.5513	24.1445
													7.5	5.04902	4.86027	7.73752	6.27947	5.85286	1.99456	12.0166	7.61201	12.204	13.2335	14.7575	10.927	15.4452	19.7005	21.4177		7.5	5.86106	4.96777	6.75435	14.3568	11.8644	16.8493	21.4177	18.6534	24.182
													7.53333	5.12408	4.8928	7.67165	6.2602	5.80773	2.02382	12.0778	7.81541	12.5096	13.3323	14.9054	11.0752	15.5908	20.0578	21.475		7.53333	5.87073	4.9751	6.76636	14.2304	11.7459	16.715	21.475	18.7494	24.2007
													7.56667	5.1934	4.92334	7.59686	6.23926	5.76457	2.04955	12.1422	7.99792	12.7861	13.416	15.0496	11.2586	15.7323	20.3786	21.5205		7.56667	5.87879	4.97903	6.77854	14.0875	11.6151	16.5599	21.5205	18.833	24.208
													7.6	5.25579	4.9471	7.51626	6.20668	5.72748	2.08348	12.2157	8.17806	13.047	13.4842	15.1927	11.4691	15.8751	20.656	21.5574		7.6	5.87816	4.97236	6.78396	13.9298	11.4701	16.3894	21.5574	18.9052	24.2096
													7.63333	5.30974	4.97049	7.42966	6.18205	5.69715	2.1163	12.2993	8.35308	13.3082	13.5358	15.3377	11.7131	16.0247	20.8775	21.5735		7.63333	5.86496	4.95242	6.7775	13.7734	11.3306	16.2162	21.5735	18.9506	24.1963
													7.66667	5.3661	4.99677	7.34809	6.16756	5.67029	2.14403	12.3826	8.53508	13.5564	13.5761	15.4823	11.9967	16.1754	21.0307	21.5829		7.66667	5.84967	4.92982	6.76952	13.6215	11.1964	16.0467	21.5829	18.9866	24.1793
													7.7	5.41811	5.02095	7.26138	6.15886	5.64668	2.16615	12.4687	8.73532	13.7896	13.6168	15.6185	12.3018	16.312	21.1228	21.571		7.7	5.83532	4.90672	6.76392	13.4716	11.0632	15.88	21.571	19.0036	24.1383
													7.73333	5.46367	5.02653	7.16506	6.15565	5.62364	2.19263	12.5371	8.91116	14.0088	13.6654	15.7515	12.6093	16.4284	21.149	21.5397		7.73333	5.81632	4.88028	6.75236	13.3194	10.925	15.7139	21.5397	19.0127	24.0667
													7.76667	5.50814	5.03207	7.05958	6.14217	5.60427	2.21843	12.5908	9.05621	14.207	13.7117	15.8654	12.9328	16.5401	21.1181	21.4985		7.76667	5.7918	4.84812	6.73548	13.1746	10.7918	15.5573	21.4985	19.0142	23.9829
													7.8	5.54366	5.02636	6.95031	6.11063	5.5827	2.24026	12.6431	9.19017	14.3801	13.7482	15.9583	13.2791	16.6394	21.0596	21.4691		7.8	5.76	4.80852	6.71147	13.0306	10.6601	15.4012	21.4691	19.0202	23.918
													7.83333	5.57262	5.01074	6.84371	6.08094	5.56119	2.26653	12.7291	9.31445	14.5199	13.784	16.0293	13.6672	16.7211	20.9696	21.4335		7.83333	5.72274	4.76353	6.68194	12.8809	10.5186	15.2432	21.4335	19.0153	23.8516
													7.86667	5.59766	4.99312	6.74125	6.04949	5.54093	2.30123	12.8239	9.43534	14.6288	13.8072	16.0904	14.0906	16.7735	20.8585	21.3973		7.86667	5.68356	4.71662	6.6505	12.7124	10.3566	15.0681	21.3973	19.002	23.7925
													7.9	5.62038	4.97037	6.62996	6.01613	5.51097	2.34366	12.9221	9.55633	14.7183	13.837	16.1354	14.5208	16.8051	20.7213	21.3575		7.9	5.64067	4.6663	6.61504	12.5453	10.1927	14.8979	21.3576	18.9849	23.7302
													7.93333	5.6335	4.93959	6.52035	5.99738	5.47119	2.38401	13.016	9.66743	14.7855	13.856	16.1657	14.9589	16.8129	20.5583	21.3072		7.93333	5.59429	4.6123	6.57628	12.3871	10.0367	14.7374	21.3072	18.9554	23.659
													7.96667	5.64108	4.89077	6.41571	5.96945	5.42657	2.43118	13.0735	9.78165	14.8203	13.8763	16.1728	15.392	16.7931	20.3636	21.2544		7.96667	5.55382	4.56347	6.54416	12.2168	9.86658	14.5671	21.2544	18.9194	23.5894
													8	5.64259	4.83317	6.3084	5.93418	5.37735	2.4828	13.1509	9.89222	14.8447	13.8873	16.1713	15.8002	16.7744	20.1327	21.2066		8	5.5158	4.51681	6.51478	12.0511	9.69957	14.4026	21.2066	18.8795	23.5336
													8.03333	5.63415	4.76879	6.19663	5.88505	5.32628	2.54061	13.2287	9.97918	14.8605	13.8739	16.1731	16.1805	16.7861	19.8748	21.1631		8.03333	5.48222	4.47383	6.49061	11.879	9.52532	14.2328	21.1631	18.836	23.4903
													8.06667	5.622	4.71719	6.10225	5.81828	5.27107	2.60672	13.3155	10.0713	14.8675	13.8333	16.1566	16.5476	16.8194	19.6062	21.1123		8.06667	5.45414	4.43536	6.47292	11.7047	9.35076	14.0587	21.1123	18.7784	23.4462
													8.1	5.60644	4.67381	6.02946	5.74918	5.20941	2.69557	13.411	10.164	14.8802	13.779	16.1278	16.8898	16.8667	19.3297	21.0583		8.1	5.42533	4.39612	6.45453	11.5357	9.18689	13.8845	21.0583	18.7091	23.4075
													8.13333	5.5897	4.64846	5.96831	5.67942	5.13792	2.81425	13.4921	10.2451	14.9086	13.6987	16.0922	17.1901	16.9415	19.031	21.0037		8.13333	5.39903	4.35902	6.43903	11.383	9.04089	13.7252	21.0037	18.6433	23.3642
													8.16667	5.56538	4.64697	5.91644	5.60399	5.05408	2.94772	13.5484	10.3154	14.9596	13.5978	16.0609	17.4402	17.044	18.7288	20.9434		8.16667	5.37858	4.32667	6.43049	11.2348	8.90154	13.568	20.9434	18.5719	23.315
													8.2	5.53884	4.6645	5.86321	5.53878	4.96549	3.08667	13.6027	10.3764	15.0333	13.4908	16.0371	17.6364	17.186	18.4394	20.8938		8.2	5.35646	4.2926	6.42033	11.1093	8.78337	13.4352	20.8938	18.5134	23.2743
													8.23333	5.50215	4.70142	5.81348	5.47615	4.87792	3.23389	13.6318	10.4294	15.1148	13.3661	16.0096	17.7754	17.3458	18.1651	20.8424		8.23333	5.33585	4.25961	6.41209	11.0054	8.68695	13.3239	20.8424	18.4525	23.2323
													8.26667	5.46461	4.76237	5.78687	5.4046	4.78818	3.39711	13.6462	10.48	15.2107	13.2281	15.9769	17.8609	17.5294	17.8946	20.7895		8.26667	5.31608	4.22843	6.40374	10.9233	8.61286	13.2338	20.7895	18.392	23.1869
													8.3	5.42385	4.85847	5.77128	5.33407	4.69037	3.56762	13.6773	10.5225	15.3258	13.0783	15.9507	17.9117	17.7338	17.642	20.7381		8.3	5.28541	4.18863	6.3822	10.8711	8.56296	13.1793	20.7381	18.3401	23.1361
													8.33333	5.37926	4.97123	5.76064	5.2497	4.58661	3.73404	13.7111	10.5284	15.4322	12.9105	15.9137	17.9291	17.919	17.4131	20.6729		8.33333	5.24914	4.14368	6.3546	10.844	8.53709	13.151	20.6729	18.281	23.0649
													8.36667	5.33909	5.09687	5.75324	5.1507	4.47553	3.90587	13.7483	10.5382	15.517	12.755	15.8631	17.9184	18.0782	17.2004	20.6062		8.36667	5.20671	4.09392	6.3195	10.8348	8.52851	13.1411	20.6062	18.2248	22.9875
													8.4	5.29883	5.23057	5.71971	5.05371	4.36437	4.07709	13.7644	10.5316	15.5817	12.6097	15.8148	17.8825	18.2276	17.0311	20.5716		8.4	5.15686	4.0373	6.27643	10.8235	8.51719	13.1298	20.5716	18.2018	22.9414
													8.43333	5.26215	5.37176	5.66165	4.94376	4.25245	4.23354	13.779	10.5251	15.6169	12.462	15.7676	17.8346	18.3499	16.8875	20.5455		8.43333	5.10577	3.98051	6.23103	10.7937	8.48665	13.1008	20.5455	18.1902	22.9008
													8.46667	5.23106	5.51208	5.58584	4.83772	4.14698	4.36596	13.7889	10.5283	15.6221	12.3182	15.7192	17.7669	18.4425	16.7786	20.5183		8.46667	5.05218	3.92174	6.18263	10.7434	8.43677	13.0501	20.5183	18.1748	22.8619
													8.5	5.2045	5.63812	5.52081	4.73806	4.04403	4.48439	13.7893	10.5369	15.6033	12.1815	15.6592	17.6773	18.5113	16.7073	20.4931		8.5	4.9896	3.85453	6.12468	10.6821	8.38005	12.9841	20.4931	18.1596	22.8267
													8.53333	5.17589	5.7561	5.47776	4.64016	3.93896	4.59839	13.8037	10.5488	15.5708	12.0453	15.5878	17.5605	18.5388	16.6581	20.4449		8.53333	4.92072	3.78217	6.05928	10.6	8.30508	12.8949	20.4449	18.1138	22.7761
													8.56667	5.15452	5.8655	5.45192	4.56042	3.83581	4.70592	13.8158	10.5575	15.5248	11.8938	15.5177	17.421	18.5235	16.6381	20.4096		8.56667	4.83751	3.69836	5.97665	10.5031	8.21665	12.7896	20.4096	18.0804	22.7388
													8.6	5.13283	5.9625	5.41163	4.48963	3.73496	4.80147	13.8109	10.5662	15.4658	11.7351	15.4536	17.2693	18.4678	16.6546	20.3853		8.6	4.74965	3.60976	5.88955	10.3877	8.10829	12.667	20.3853	18.0501	22.7205
													8.63333	5.11153	6.05017	5.36014	4.41777	3.63881	4.89162	13.7983	10.5661	15.3941	11.5765	15.4038	17.1032	18.3695	16.692	20.3754		8.63333	4.66384	3.52226	5.80542	10.2629	7.99174	12.5341	20.3754	18.0273	22.7235
													8.66667	5.0945	6.13749	5.31433	4.36033	3.54821	4.98406	13.7547	10.5693	15.3087	11.4222	15.3577	16.9276	18.2614	16.733	20.3977		8.66667	4.57426	3.43339	5.71514	10.1203	7.85751	12.3831	20.3977	18.0355	22.76
													8.7	5.06782	6.22438	5.26544	4.30943	3.46377	5.06858	13.6804	10.568	15.2201	11.257	15.3161	16.7524	18.1509	16.7907	20.4213		8.7	4.47811	3.33988	5.61634	9.97609	7.71877	12.2334	20.4213	18.0416	22.801
													8.73333	5.03412	6.30182	5.21936	4.26051	3.37972	5.14474	13.6087	10.5822	15.1188	11.0895	15.261	16.5781	18.035	16.8373	20.4361		8.73333	4.38026	3.24545	5.51507	9.82921	7.57607	12.0823	20.4361	18.0395	22.8327
													8.76667	4.99513	6.36497	5.19256	4.21895	3.29335	5.20969	13.52	10.589	15.0101	10.9164	15.2104	16.3858	17.9271	16.886	20.4522		8.76667	4.2741	3.14275	5.40545	9.69225	7.43821	11.9463	20.4522	18.0382	22.8662
													8.8	4.94642	6.42089	5.18118	4.16932	3.20204	5.26753	13.4361	10.5855	14.902	10.7494	15.1743	16.1915	17.8281	16.9331	20.463		8.8	4.1663	3.03899	5.2936	9.55771	7.30186	11.8136	20.463	18.0288	22.8972
													8.83333	4.89863	6.46293	5.17443	4.11679	3.10895	5.31566	13.3606	10.5686	14.7913	10.5872	15.1498	15.9947	17.7463	16.9752	20.4877		8.83333	4.05843	2.93601	5.18086	9.44604	7.18343	11.7086	20.4877	18.0292	22.9462
													8.86667	4.84868	6.49884	5.15742	4.05964	3.00996	5.35961	13.2544	10.555	14.669	10.4299	15.1412	15.7987	17.6666	17.0171	20.5328		8.86667	3.95256	2.83494	5.07019	9.35271	7.08133	11.6241	20.5328	18.0469	23.0186
													8.9	4.78872	6.52456	5.11777	3.99002	2.90716	5.39746	13.1562	10.5451	14.5407	10.2868	15.1346	15.6083	17.5938	17.0542	20.5754		8.9	3.85254	2.7384	4.96669	9.25673	6.97348	11.54	20.5754	18.0643	23.0865
													8.93333	4.72621	6.54244	5.0737	3.91515	2.79714	5.41501	13.0651	10.5267	14.4147	10.1694	15.1255	15.4003	17.5209	17.1042	20.6039		8.93333	3.75	2.6396	4.86039	9.17384	6.87947	11.4682	20.6038	18.0767	23.131
													8.96667	4.64902	6.54697	5.02585	3.82656	2.68263	5.41736	12.9743	10.5016	14.2746	10.07	15.122	15.175	17.4653	17.171	20.6174		8.96667	3.64489	2.53962	4.75016	9.10001	6.79685	11.4032	20.6174	18.0766	23.1583
													9	4.56256	6.53573	4.97957	3.721	2.57041	5.41196	12.8793	10.485	14.1187	10.001	15.1148	14.9455	17.4023	17.2673	20.6121		9	3.54251	2.44061	4.64441	9.0557	6.73575	11.3756	20.6121	18.0613	23.1629
													9.03333	4.47724	6.5199	4.94538	3.60604	2.45818	5.39005	12.7988	10.4717	13.9531	9.95713	15.1144	14.7035	17.3183	17.4073	20.5956		9.03333	3.44651	2.34656	4.54645	9.0305	6.68772	11.3733	20.5956	18.0352	23.156
													9.06667	4.38886	6.49029	4.90746	3.48	2.35017	5.36706	12.7374	10.465	13.7856	9.93568	15.1528	14.4638	17.2204	17.5776	20.5689		9.06667	3.35416	2.25703	4.45129	9.0448	6.67579	11.4138	20.5689	18.0009	23.1369
													9.1	4.29536	6.46095	4.85781	3.35034	2.24694	5.3617	12.6848	10.4499	13.6175	9.92179	15.1913	14.2371	17.1111	17.7612	20.533		9.1	3.27066	2.17582	4.36549	9.08468	6.68531	11.4841	20.533	17.9558	23.1102
													9.13333	4.20206	6.42654	4.80395	3.20823	2.1546	5.37369	12.6223	10.446	13.4433	9.90023	15.219	14.0155	16.9937	17.9668	20.4933		9.13333	3.18679	2.09406	4.27953	9.14867	6.71315	11.5842	20.4933	17.9051	23.0814
													9.16667	4.09522	6.3915	4.7325	3.05725	2.06943	5.41038	12.5387	10.455	13.2668	9.85765	15.2455	13.8056	16.8468	18.1982	20.4594		9.16667	3.1013	2.01127	4.19133	9.22672	6.75065	11.7028	20.4594	17.8651	23.0537
													9.2	3.98715	6.35483	4.65471	2.90685	1.99756	5.45963	12.4645	10.4576	13.0908	9.80109	15.2556	13.6068	16.6868	18.4404	20.4065		9.2	3.01177	1.92301	4.10054	9.31892	6.79771	11.8401	20.4065	17.8115	23.0016
													9.23333	3.87863	6.31224	4.57188	2.74848	1.93276	5.52102	12.3921	10.4318	12.9289	9.72549	15.2656	13.4167	16.5161	18.6718	20.3486		9.23333	2.91927	1.83188	4.00666	9.42315	6.85609	11.9902	20.3487	17.7513	22.946
													9.26667	3.76587	6.2693	4.47944	2.57919	1.87496	5.61858	12.3178	10.4154	12.7657	9.63599	15.2708	13.2558	16.3514	18.8774	20.3139		9.26667	2.82098	1.73489	3.90708	9.53473	6.91816	12.1513	20.3139	17.7134	22.9144
													9.3	3.66304	6.22868	4.39414	2.41437	1.82735	5.75903	12.2371	10.4033	12.6222	9.53298	15.2619	13.1188	16.1858	19.0613	20.2752		9.3	2.72198	1.63477	3.80919	9.65626	6.9839	12.3286	20.2752	17.6742	22.8762
													9.33333	3.56075	6.189	4.30168	2.2587	1.77525	5.91963	12.1779	10.3837	12.5028	9.41298	15.2633	12.991	16.0225	19.2313	20.245		9.33333	2.61545	1.5301	3.7008	9.76816	7.04297	12.4933	20.245	17.6433	22.8467
													9.36667	3.45592	6.14829	4.20532	2.11884	1.7187	6.09474	12.1151	10.3509	12.4035	9.28696	15.2628	12.8884	15.8666	19.3645	20.2336		9.36667	2.49999	1.41776	3.58222	9.88661	7.10704	12.6662	20.2336	17.6304	22.8368
													9.4	3.35323	6.12126	4.12266	1.99299	1.65849	6.26346	12.0481	10.3095	12.325	9.15085	15.2281	12.7996	15.6977	19.4583	20.2334		9.4	2.38833	1.30651	3.47014	10.0034	7.16605	12.8407	20.2334	17.6217	22.8451
													9.43333	3.25706	6.09205	4.06527	1.87918	1.59594	6.41	11.9618	10.277	12.2728	9.00945	15.1884	12.7343	15.515	19.5368	20.2552		9.43333	2.27561	1.19534	3.35587	10.1158	7.22185	13.0098	20.2551	17.6357	22.8746
													9.46667	3.16568	6.06499	4.0117	1.79423	1.53152	6.53609	11.87	10.2326	12.2385	8.87206	15.1544	12.7041	15.3216	19.6009	20.2888		9.46667	2.16661	1.08913	3.24408	10.2298	7.27569	13.1838	20.2887	17.6653	22.9122
													9.5	3.0817	6.0577	3.95395	1.72307	1.47173	6.64259	11.7908	10.1883	12.2071	8.7464	15.1088	12.6966	15.1185	19.6423	20.3159		9.5	2.06333	0.98986	3.13681	10.339	7.32245	13.3555	20.3159	17.6856	22.9462
													9.53333	2.9986	6.05215	3.8932	1.66024	1.40909	6.72462	11.7123	10.1622	12.1719	8.62728	15.0684	12.7183	14.91	19.6645	20.3515		9.53333	1.96806	0.901041	3.03507	10.4435	7.36483	13.5222	20.3515	17.7131	22.9899
													9.56667	2.91457	6.05606	3.83996	1.60472	1.34381	6.78472	11.642	10.1478	12.1135	8.53153	15.0359	12.7666	14.7209	19.693	20.3713		9.56667	1.88121	0.82027	2.94215	10.5475	7.40739	13.6877	20.3713	17.7239	23.0188
													9.6	2.82812	6.07325	3.80538	1.55839	1.27648	6.8159	11.5781	10.125	12.0428	8.44127	15.0092	12.8404	14.547	19.7341	20.3803		9.6	1.80867	0.754752	2.8626	10.6406	7.44419	13.837	20.3803	17.7194	23.0413
													9.63333	2.73757	6.10055	3.78047	1.51563	1.20568	6.81329	11.5321	10.1139	11.9615	8.3555	14.9892	12.945	14.3937	19.7754	20.3949		9.63333	1.74271	0.697744	2.78768	10.7222	7.47635	13.968	20.3949	17.7135	23.0764
													9.66667	2.63913	6.14063	3.75085	1.47527	1.14264	6.80018	11.4885	10.1096	11.868	8.27755	14.9615	13.0977	14.254	19.8299	20.3894		9.66667	1.68509	0.646676	2.72351	10.7986	7.50761	14.0896	20.3894	17.6788	23.1
													9.7	2.53835	6.17791	3.73754	1.43739	1.08522	6.80743	11.4484	10.1159	11.7657	8.21486	14.9257	13.2761	14.1309	19.9247	20.3588		9.7	1.63918	0.606088	2.67228	10.8555	7.52892	14.1822	20.3588	17.6191	23.0984
													9.73333	2.43231	6.22449	3.73342	1.40231	1.03207	6.84919	11.4157	10.1179	11.6583	8.17573	14.902	13.4677	14.0185	20.0571	20.3167		9.73333	1.58774	0.562982	2.61249	10.8899	7.53493	14.2449	20.3167	17.5587	23.0747
													9.76667	2.31568	6.27928	3.69463	1.36274	0.98508	6.9253	11.3988	10.1182	11.5379	8.17021	14.8639	13.6516	13.933	20.2265	20.2482		9.76667	1.53211	0.515159	2.54906	10.9192	7.53933	14.2991	20.2482	17.4832	23.0131
													9.8	2.20078	6.33743	3.64636	1.31169	0.933465	7.03331	11.4005	10.1315	11.4049	8.19587	14.8113	13.825	13.8592	20.4177	20.1619		9.8	1.47119	0.461847	2.48053	10.9379	7.53819	14.3376	20.1619	17.3896	22.9342
													9.83333	2.08786	6.38862	3.60394	1.2499	0.876552	7.16399	11.4119	10.1398	11.2707	8.23617	14.7711	13.9849	13.8103	20.6205	20.0596		9.83333	1.40975	0.407489	2.41201	10.938	7.52797	14.3481	20.0596	17.2824	22.8368
													9.86667	1.97687	6.43975	3.56547	1.17318	0.821901	7.32068	11.4266	10.1228	11.1348	8.30241	14.7201	14.1186	13.7985	20.8485	19.944		9.86667	1.34671	0.350439	2.34298	10.9307	7.51724	14.3442	19.944	17.1635	22.7245
													9.9	1.87033	6.48972	3.54814	1.08855	0.772309	7.50624	11.444	10.1232	11.0117	8.38859	14.6582	14.2308	13.7787	21.0915	19.8564		9.9	1.28579	0.295147	2.27643	10.9368	7.52152	14.352	19.8564	17.0672	22.6457
													9.93333	1.77049	6.52454	3.53604	0.991668	0.72607	7.71282	11.4567	10.1394	10.896	8.48827	14.6041	14.318	13.7618	21.3507	19.7644		9.93333	1.22333	0.238242	2.20842	10.9471	7.52698	14.3672	19.7644	16.97	22.5589
													9.96667	1.68013	6.54752	3.51704	0.896111	0.678092	7.93644	11.4564	10.149	10.793	8.59193	14.5381	14.3836	13.7358	21.6315	19.6493		9.96667	1.15882	0.178226	2.13941	10.961	7.53016	14.3918	19.6494	16.8571	22.4416
													10	1.60338	6.55262	3.50782	0.802274	0.620027	8.16457	11.4573	10.1544	10.7	8.71599	14.4756	14.43	13.7088	21.9116	19.5511		10	1.08903	0.112333	2.06574	10.9829	7.53606	14.4297	19.5511	16.7615	22.3406
													10.0333	1.53446	6.55199	3.47241	0.711856	0.561689	8.38755	11.473	10.1417	10.614	8.84222	14.4039	14.4648	13.6774	22.1776	19.4697		10.0333	1.01803	0.0452385	1.99082	11.0223	7.55334	14.4912	19.4697	16.6802	22.2592
													10.0667	1.47647	6.54235	3.42438	0.625482	0.497601	8.59074	11.476	10.1383	10.5367	8.95449	14.3159	14.4837	13.6718	22.4284	19.417		10.0667	0.954063	-0.0160313	1.92416	11.0853	7.58994	14.5806	19.417	16.6135	22.2204
													10.1	1.42611	6.52259	3.38775	0.546334	0.432601	8.77347	11.4787	10.1447	10.4659	9.07286	14.2542	14.4946	13.6713	22.6212	19.3572		10.1	0.894266	-0.0742551	1.86279	11.1579	7.6326	14.6833	19.3572	16.5301	22.1843
													10.1333	1.37606	6.49824	3.35464	0.465799	0.370739	8.93804	11.4704	10.1583	10.4119	9.18565	14.2041	14.4947	13.6792	22.7644	19.2965		10.1333	0.842293	-0.124315	1.8089	11.2395	7.6795	14.7996	19.2965	16.4454	22.1475
													10.1667	1.3235	6.47308	3.31939	0.395415	0.311069	9.08621	11.4626	10.1843	10.3768	9.30088	14.1396	14.5002	13.6888	22.8719	19.2514		10.1667	0.793825	-0.171289	1.75894	11.3448	7.74255	14.9471	19.2515	16.3797	22.1233
													10.2	1.26527	6.44972	3.27917	0.340143	0.245501	9.23118	11.4571	10.2256	10.362	9.41707	14.0926	14.5327	13.6934	22.9293	19.2076		10.2	0.744378	-0.219538	1.70829	11.4684	7.81235	15.1245	19.2076	16.3154	22.0999
													10.2333	1.20522	6.42659	3.21519	0.298928	0.17649	9.37121	11.4455	10.2704	10.3592	9.52465	14.0535	14.5811	13.7133	22.9348	19.1517		10.2333	0.691988	-0.269202	1.65318	11.6009	7.8829	15.3188	19.1517	16.2426	22.0608
													10.2667	1.14317	6.40595	3.13155	0.285084	0.105732	9.51456	11.4278	10.3125	10.3634	9.62487	14.0221	14.6569	13.7242	22.8863	19.1108		10.2667	0.636177	-0.321715	1.59407	11.7567	7.97013	15.5432	19.1108	16.1801	22.0415
													10.3	1.07889	6.39259	3.0293	0.289463	0.0377737	9.65456	11.4084	10.3562	10.3664	9.73616	13.9891	14.7529	13.7556	22.7959	19.0921		10.3	0.585655	-0.368649	1.53996	11.9194	8.0628	15.776	19.0921	16.1341	22.0501
													10.3333	1.0175	6.38275	2.92127	0.298602	-0.0233737	9.78704	11.3859	10.4074	10.3771	9.82906	13.9519	14.8551	13.8002	22.6637	19.0643		10.3333	0.54089	-0.410195	1.49198	12.0854	8.16161	16.0091	19.0643	16.0828	22.0458
													10.3667	0.954978	6.38332	2.81677	0.308525	-0.0791048	9.90957	11.3408	10.4806	10.3923	9.90895	13.9215	14.9627	13.856	22.4953	19.0317		10.3667	0.492618	-0.454509	1.43975	12.2418	8.25481	16.2287	19.0318	16.0268	22.0367
													10.4	0.886456	6.3927	2.71603	0.311771	-0.128007	10.0275	11.3005	10.5594	10.4124	9.99032	13.8962	15.0797	13.9202	22.3073	18.9747		10.4	0.437067	-0.504992	1.37913	12.385	8.34127	16.4286	18.9747	15.9514	21.998
													10.4333	0.817723	6.40622	2.63186	0.311832	-0.172349	10.1297	11.2457	10.6193	10.435	10.0503	13.8591	15.2149	13.9884	22.1243	18.937		10.4333	0.378475	-0.557928	1.31488	12.5072	8.41321	16.6013	18.937	15.8947	21.9793
													10.4667	0.747926	6.429	2.56509	0.316417	-0.209708	10.2312	11.1828	10.656	10.4592	10.0983	13.8167	15.3747	14.0607	21.9288	18.9015		10.4667	0.313233	-0.617106	1.24357	12.6133	8.47784	16.7488	18.9015	15.838	21.965
													10.5	0.682341	6.45144	2.5159	0.31403	-0.243561	10.3275	11.1286	10.688	10.4891	10.1401	13.7861	15.5436	14.1285	21.7211	18.8594		10.5	0.247818	-0.676553	1.17219	12.6972	8.53093	16.8634	18.8594	15.7679	21.9509
													10.5333	0.627242	6.46681	2.47867	0.308223	-0.272977	10.3995	11.0759	10.7068	10.5205	10.1645	13.7468	15.7048	14.1932	21.5009	18.8218		10.5333	0.181096	-0.736401	1.09859	12.7718	8.58694	16.9567	18.8218	15.7012	21.9424
													10.5667	0.575434	6.48215	2.44694	0.309934	-0.295754	10.4646	11.0263	10.7292	10.5481	10.1739	13.7023	15.8737	14.2503	21.2756	18.7715		10.5667	0.116287	-0.794242	1.02682	12.8277	8.63223	17.0233	18.7715	15.625	21.9181
													10.6	0.527844	6.48689	2.42083	0.314329	-0.311687	10.5144	10.9963	10.7488	10.5723	10.1888	13.6497	16.0141	14.3142	21.0388	18.7056		10.6	0.0510582	-0.852422	0.954538	12.8558	8.6591	17.0525	18.7056	15.5414	21.8698
													10.6333	0.480492	6.48524	2.40979	0.331883	-0.326456	10.549	10.9576	10.7692	10.5963	10.1987	13.6132	16.1236	14.3685	20.7847	18.6467		10.6333	-0.0201402	-0.91566	0.875379	12.8739	8.68362	17.0642	18.6467	15.4661	21.8273
													10.6667	0.425416	6.47767	2.40073	0.358107	-0.337046	10.5837	10.9296	10.7984	10.6187	10.2084	13.5749	16.2018	14.428	20.5505	18.5897		10.6667	-0.0931918	-0.97973	0.793346	12.8728	8.69379	17.0517	18.5897	15.3938	21.7855
													10.7	0.3739	6.46269	2.40651	0.383387	-0.349757	10.6148	10.9061	10.8276	10.6461	10.2222	13.5455	16.2435	14.4823	20.3274	18.5248		10.7	-0.161806	-1.0401	0.716488	12.8561	8.69284	17.0194	18.5248	15.3185	21.7312
													10.7333	0.328339	6.43639	2.4151	0.418206	-0.363377	10.6417	10.8598	10.8579	10.6728	10.2385	13.5166	16.2581	14.5145	20.1178	18.4504		10.7333	-0.226543	-1.09742	0.644331	12.8214	8.67129	16.9716	18.4504	15.2357	21.6651
													10.7667	0.281418	6.40895	2.41372	0.4457	-0.3804	10.6755	10.836	10.889	10.7048	10.2742	13.4821	16.2439	14.5552	19.9422	18.3578		10.7667	-0.28358	-1.14715	0.579987	12.792	8.65277	16.9311	18.3578	15.1406	21.575
													10.8	0.23274	6.36533	2.41298	0.47938	-0.399826	10.705	10.8261	10.919	10.738	10.3281	13.4421	16.1908	14.5904	19.8083	18.258		10.8	-0.333786	-1.19041	0.522834	12.762	8.62907	16.895	18.258	15.0391	21.4769
													10.8333	0.176741	6.32113	2.41246	0.529296	-0.418817	10.7285	10.801	10.9432	10.7665	10.3951	13.4052	16.1073	14.6344	19.7077	18.1462		10.8333	-0.382891	-1.23245	0.466672	12.7293	8.59738	16.8612	18.1462	14.9305	21.3619
													10.8667	0.115093	6.28912	2.4132	0.58544	-0.429593	10.7643	10.7768	10.9658	10.8025	10.4863	13.3725	16.0007	14.6874	19.6402	18.026		10.8667	-0.422623	-1.26674	0.421499	12.6843	8.55001	16.8186	18.026	14.8138	21.2382
													10.9	0.0512071	6.25566	2.41848	0.634934	-0.444106	10.7898	10.7512	10.9793	10.8426	10.5977	13.3348	15.8683	14.7529	19.6206	17.8901		10.9	-0.456677	-1.29698	0.383625	12.6392	8.50226	16.7761	17.8901	14.6777	21.1025
													10.9333	-0.0147945	6.23249	2.43309	0.67294	-0.458903	10.8004	10.714	10.9969	10.8951	10.7254	13.2884	15.7308	14.813	19.6535	17.7683		10.9333	-0.489759	-1.32672	0.347202	12.6019	8.46294	16.7409	17.7683	14.5506	20.986
													10.9667	-0.0808668	6.21042	2.44971	0.69586	-0.478457	10.8104	10.6953	11.0044	10.9544	10.8746	13.2304	15.5858	14.8767	19.7281	17.6359		10.9667	-0.515608	-1.35111	0.319897	12.5616	8.41923	16.704	17.6358	14.4155	20.8561
													11	-0.14369	6.19883	2.46818	0.720758	-0.500426	10.8221	10.6705	11.0045	11.0274	11.0416	13.1682	15.4325	14.9367	19.8299	17.5154		11	-0.533916	-1.36848	0.300653	12.5222	8.37218	16.6722	17.5154	14.2935	20.7372
													11.0333	-0.21293	6.19039	2.47073	0.746317	-0.521337	10.8433	10.632	10.9964	11.0978	11.2165	13.0915	15.2725	14.9887	19.9273	17.4066		11.0333	-0.551416	-1.38593	0.283097	12.4823	8.32539	16.6391	17.4067	14.1823	20.6311
													11.0667	-0.285907	6.17846	2.46629	0.770712	-0.53534	10.8709	10.6158	10.9843	11.1723	11.389	13.0175	15.1092	15.0507	19.9998	17.2897		11.0667	-0.563828	-1.39853	0.270872	12.4452	8.28581	16.6045	17.2897	14.066	20.5134
													11.1	-0.356584	6.17121	2.45623	0.806266	-0.543462	10.9077	10.5905	10.9792	11.2441	11.5469	12.9286	14.9285	15.1151	20.0311	17.1864		11.1	-0.576767	-1.41273	0.259195	12.4097	8.24828	16.5711	17.1864	13.9615	20.4113
													11.1333	-0.424473	6.17506	2.43406	0.837279	-0.546925	10.9448	10.5584	10.9856	11.3047	11.6835	12.8478	14.733	15.1955	20.0331	17.0924		11.1333	-0.592002	-1.4303	0.246295	12.3604	8.19876	16.522	17.0924	13.8687	20.3161
													11.1667	-0.482222	6.18082	2.40363	0.861966	-0.549561	10.9783	10.5338	10.9865	11.3597	11.8006	12.7604	14.5402	15.3018	20.0057	17.0148		11.1667	-0.605868	-1.44677	0.235031	12.2967	8.1395	16.454	17.0148	13.7873	20.2424
													11.2	-0.534538	6.18248	2.37673	0.882906	-0.553994	10.9963	10.4921	10.9811	11.4039	11.8967	12.6724	14.3722	15.4218	19.9623	16.972		11.2	-0.624339	-1.46639	0.217711	12.2283	8.07743	16.3792	16.972	13.7356	20.2084
													11.2333	-0.583111	6.17634	2.36704	0.894619	-0.551347	11.0151	10.4329	10.9747	11.4443	11.9791	12.5858	14.2206	15.5553	19.8834	16.9652		11.2333	-0.642973	-1.48507	0.199124	12.142	8.00169	16.2824	16.9652	13.7167	20.2137
													11.2667	-0.62236	6.16865	2.35665	0.90618	-0.54553	11.0515	10.3765	10.9624	11.4809	12.0467	12.4885	14.0991	15.7336	19.763	16.9499		11.2667	-0.651631	-1.49406	0.1908	12.0382	7.90596	16.1705	16.9499	13.6913	20.2085
													11.3	-0.656557	6.15501	2.34327	0.905051	-0.528184	11.0889	10.3038	10.9551	11.522	12.0898	12.3955	14.0032	15.956	19.6065	16.9258		11.3	-0.660783	-1.5033	0.181736	11.9379	7.81132	16.0644	16.9258	13.6563	20.1952
													11.3333	-0.69099	6.13508	2.33864	0.887158	-0.506304	11.1209	10.2171	10.937	11.5535	12.1141	12.3121	13.9315	16.2045	19.4106	16.8879		11.3333	-0.671556	-1.51489	0.171778	11.8476	7.72638	15.9689	16.8879	13.6063	20.1695
													11.3667	-0.717806	6.11718	2.35806	0.851483	-0.486045	11.1546	10.1343	10.9127	11.5872	12.1207	12.2413	13.8819	16.4741	19.1945	16.8616		11.3667	-0.688842	-1.53278	0.155094	11.7566	7.63812	15.8752	16.8616	13.5659	20.1573
													11.4	-0.736718	6.11317	2.39671	0.794499	-0.468956	11.1834	10.042	10.8787	11.627	12.1043	12.185	13.8558	16.7652	18.9554	16.861		11.4	-0.711706	-1.55673	0.13332	11.6793	7.55826	15.8004	16.861	13.5456	20.1764
													11.4333	-0.754907	6.09916	2.43637	0.723862	-0.451378	11.1925	9.95026	10.8263	11.6721	12.0783	12.1448	13.8731	17.0733	18.7148	16.8785		11.4333	-0.731797	-1.57912	0.115521	11.6027	7.47729	15.728	16.8785	13.5378	20.2192
													11.4667	-0.767558	6.08325	2.46769	0.642066	-0.438118	11.1978	9.84778	10.7558	11.7251	12.0439	12.1062	13.9351	17.3911	18.4633	16.9093		11.4667	-0.745389	-1.5951	0.104321	11.5172	7.38907	15.6454	16.9092	13.5367	20.2818
													11.5	-0.781779	6.07556	2.49804	0.548453	-0.422412	11.2128	9.73289	10.6832	11.7874	12.0116	12.0615	14.0297	17.7284	18.1983	16.9622		11.5	-0.752131	-1.60529	0.101031	11.4428	7.30991	15.5756	16.9622	13.5542	20.3702
													11.5333	-0.797863	6.07068	2.52833	0.451612	-0.406696	11.2375	9.62333	10.6003	11.8567	11.9696	12.0166	14.1224	18.1137	17.932	17.0215		11.5333	-0.752447	-1.61007	0.105175	11.3617	7.22765	15.4957	17.0214	13.5723	20.4706
													11.5667	-0.811947	6.07285	2.55618	0.350979	-0.397771	11.2597	9.50818	10.503	11.9245	11.9226	11.9977	14.2009	18.5149	17.6607	17.07		11.5667	-0.753991	-1.61467	0.106687	11.2733	7.13688	15.4096	17.07	13.5847	20.5552
													11.6	-0.833572	6.08473	2.59724	0.242915	-0.390081	11.2685	9.39614	10.3913	11.9857	11.8659	11.999	14.2473	18.9146	17.3982	17.1234		11.6	-0.757283	-1.62016	0.105598	11.1822	7.04927	15.3152	17.1234	13.6008	20.6461
													11.6333	-0.853059	6.1079	2.64037	0.124977	-0.38693	11.2664	9.28479	10.2764	12.0409	11.8123	12.016	14.2698	19.2982	17.1458	17.1857		11.6333	-0.755347	-1.61918	0.108488	11.0716	6.95097	15.1922	17.1857	13.6256	20.7458
													11.6667	-0.867663	6.14686	2.68791	0.00266599	-0.391133	11.2586	9.17846	10.1726	12.0949	11.7666	12.0404	14.2693	19.6531	16.8892	17.2504		11.6667	-0.747848	-1.61122	0.115528	10.9427	6.84336	15.042	17.2504	13.6569	20.844
													11.7	-0.880052	6.194	2.73886	-0.112202	-0.390255	11.2255	9.06289	10.076	12.1516	11.728	12.0725	14.2609	19.9877	16.6382	17.2931		11.7	-0.730949	-1.59484	0.132945	10.8057	6.72964	14.8817	17.2931	13.6679	20.9183
													11.7333	-0.895533	6.24416	2.78798	-0.22344	-0.391438	11.1871	8.94547	9.99333	12.2044	11.6894	12.1213	14.2452	20.3001	16.4016	17.3066		11.7333	-0.706432	-1.5708	0.157936	10.6516	6.601	14.7022	17.3066	13.6508	20.9624
													11.7667	-0.911073	6.30725	2.85581	-0.327578	-0.400877	11.1543	8.82026	9.93624	12.2515	11.6465	12.18	14.2055	20.5756	16.1769	17.2937		11.7667	-0.682643	-1.54601	0.180719	10.4857	6.46559	14.5057	17.2937	13.6115	20.9758
													11.8	-0.933573	6.37646	2.92379	-0.423579	-0.402405	11.1161	8.70082	9.90808	12.2931	11.6114	12.2376	14.1353	20.8067	15.9711	17.2642		11.8	-0.66387	-1.52498	0.197243	10.3281	6.3409	14.3153	17.2642	13.5581	20.9703
													11.8333	-0.955383	6.43838	2.97837	-0.518999	-0.40537	11.0686	8.59564	9.90176	12.3272	11.5705	12.3018	14.042	20.9921	15.7749	17.2156		11.8333	-0.649589	-1.50716	0.207983	10.1747	6.22157	14.1278	17.2156	13.4916	20.9396
													11.8667	-0.972409	6.49544	3.01239	-0.613281	-0.409934	11.0184	8.49458	9.93806	12.3507	11.5164	12.3574	13.9203	21.1092	15.5879	17.1487		11.8667	-0.635459	-1.48997	0.219055	10.0311	6.10851	13.9537	17.1487	13.4133	20.8841
													11.9	-0.983729	6.5591	3.01517	-0.699807	-0.411277	10.9639	8.40538	9.9956	12.3756	11.4508	12.3794	13.7848	21.1926	15.4251	17.0836		11.9	-0.623545	-1.47616	0.229071	9.89516	6.00255	13.7878	17.0836	13.3371	20.8301
													11.9333	-0.985991	6.61125	3.00918	-0.784539	-0.412319	10.911	8.30174	10.0671	12.4002	11.3687	12.3825	13.6479	21.2663	15.2599	17.0006		11.9333	-0.61081	-1.4622	0.240582	9.76282	5.89823	13.6274	17.0006	13.2431	20.758
													11.9667	-0.985307	6.67137	3.00454	-0.855643	-0.414393	10.8565	8.1764	10.1512	12.4105	11.2778	12.3687	13.4983	21.3226	15.1227	16.9188		11.9667	-0.600757	-1.45135	0.249837	9.63678	5.798	13.4756	16.9188	13.1491	20.6885
													12	-0.984602	6.73081	2.98907	-0.924179	-0.412599	10.7862	8.05737	10.235	12.4068	11.1772	12.3512	13.3456	21.3772	15.0315	16.8292		12	-0.598863	-1.44818	0.250451	9.50743	5.69313	13.3217	16.8292	13.0478	20.6107
													12.0333	-0.98251	6.78272	2.94837	-0.993235	-0.416254	10.713	7.96334	10.32	12.3966	11.0797	12.328	13.1866	21.4338	14.9755	16.7658		12.0333	-0.598736	-1.44584	0.24837	9.39047	5.59681	13.1841	16.7658	12.9708	20.5609
													12.0667	-0.973475	6.8272	2.88111	-1.05181	-0.42429	10.6317	7.87108	10.4038	12.3719	10.9905	12.2728	13.0121	21.4673	14.9503	16.7163		12.0667	-0.600031	-1.44564	0.245575	9.28788	5.51139	13.0644	16.7163	12.9069	20.5257
													12.1	-0.962062	6.8546	2.7798	-1.10676	-0.429224	10.5499	7.7729	10.4969	12.3318	10.9089	12.2104	12.8305	21.4879	14.9433	16.6585		12.1	-0.605682	-1.44863	0.237262	9.19121	5.42462	12.9578	16.6585	12.8345	20.4826
													12.1333	-0.938049	6.87906	2.6652	-1.14859	-0.442045	10.4525	7.66422	10.5839	12.2845	10.8364	12.1414	12.6531	21.5181	14.944	16.6029		12.1333	-0.606885	-1.44932	0.23555	9.10429	5.34398	12.8646	16.6029	12.7632	20.4427
													12.1667	-0.912005	6.91164	2.54854	-1.18003	-0.454052	10.3487	7.54521	10.6422	12.2221	10.7622	12.0772	12.4601	21.5336	14.9593	16.5431		12.1667	-0.609971	-1.45344	0.233503	9.01613	5.25965	12.7726	16.5431	12.6892	20.3969
													12.2	-0.892228	6.94665	2.45091	-1.21777	-0.465982	10.2429	7.44122	10.6745	12.1457	10.6874	12.0199	12.2728	21.5272	14.9785	16.4825		12.2	-0.617399	-1.46007	0.225275	8.9202	5.16837	12.672	16.4825	12.6158	20.3492
													12.2333	-0.875109	6.98062	2.37002	-1.2542	-0.479732	10.1389	7.3489	10.6995	12.0527	10.6056	11.974	12.089	21.5063	14.9872	16.4272		12.2333	-0.619763	-1.46315	0.22362	8.82152	5.07728	12.5658	16.4272	12.548	20.3064
													12.2667	-0.859313	7.0137	2.28608	-1.28208	-0.49777	10.0478	7.26793	10.716	11.9482	10.5222	11.9283	11.9027	21.46	14.9959	16.3917		12.2667	-0.621326	-1.46684	0.224186	8.71844	4.9828	12.4541	16.3917	12.5007	20.2828
													12.3	-0.851667	7.02873	2.20204	-1.30421	-0.519994	9.97095	7.19936	10.734	11.8334	10.4291	11.8831	11.7301	21.4069	15.0027	16.358		12.3	-0.627736	-1.47585	0.220374	8.61237	4.88567	12.3391	16.358	12.4583	20.2577
													12.3333	-0.84099	7.02916	2.11295	-1.31176	-0.544023	9.91547	7.12463	10.7363	11.7115	10.321	11.8306	11.5594	21.3777	15.0143	16.3136		12.3333	-0.629823	-1.48237	0.222727	8.50579	4.78786	12.2237	16.3136	12.4077	20.2195
													12.3667	-0.831401	7.02188	2.03536	-1.31138	-0.562358	9.87871	7.0615	10.7266	11.5765	10.195	11.7773	11.3923	21.3701	15.0448	16.2428		12.3667	-0.629066	-1.48627	0.228134	8.40072	4.69493	12.1065	16.2428	12.3317	20.1538
													12.4	-0.827734	7.00738	1.97221	-1.30329	-0.57544	9.85723	7.01299	10.7057	11.4389	10.0654	11.7324	11.234	21.3987	15.0953	16.1903		12.4	-0.630742	-1.49175	0.230264	8.28801	4.59742	11.9786	16.1903	12.2752	20.1054
													12.4333	-0.822898	6.99455	1.92653	-1.28992	-0.586061	9.84577	6.97194	10.6555	11.3168	9.92299	11.684	11.0808	21.4517	15.1854	16.1577		12.4333	-0.632931	-1.49833	0.232462	8.16835	4.49969	11.837	16.1577	12.2423	20.073
													12.4667	-0.823808	6.9577	1.89447	-1.28756	-0.594797	9.85604	6.93807	10.6029	11.203	9.76158	11.6492	10.9366	21.5163	15.3053	16.1347		12.4667	-0.640017	-1.50886	0.228827	8.05302	4.40391	11.7021	16.1347	12.2218	20.0475
													12.5	-0.831378	6.90726	1.87461	-1.27669	-0.611169	9.8882	6.90419	10.5715	11.0998	9.59304	11.6131	10.8188	21.5907	15.4549	16.1154		12.5	-0.649504	-1.5213	0.222294	7.94097	4.3095	11.5724	16.1154	12.2088	20.0219
													12.5333	-0.831693	6.84756	1.83925	-1.2596	-0.628354	9.9206	6.86186	10.5387	11.0051	9.43236	11.554	10.7195	21.6678	15.6231	16.0955		12.5333	-0.657586	-1.53319	0.218018	7.84569	4.231	11.4604	16.0955	12.195	19.996
													12.5667	-0.834918	6.77411	1.80148	-1.24214	-0.644404	9.95909	6.79782	10.5051	10.9182	9.2811	11.4798	10.6333	21.7391	15.8087	16.0691		12.5667	-0.665584	-1.54464	0.213472	7.77023	4.16673	11.3737	16.0691	12.1751	19.9632
													12.6	-0.84507	6.71116	1.76137	-1.22732	-0.656864	9.9872	6.73572	10.478	10.8367	9.14144	11.4197	10.5624	21.7895	16.0135	16.0483		12.6	-0.679835	-1.56062	0.20095	7.70806	4.11435	11.3018	16.0483	12.1638	19.9328
													12.6333	-0.846463	6.65679	1.70947	-1.21326	-0.668139	10.0024	6.68491	10.4458	10.7639	9.00565	11.3635	10.4983	21.8215	16.2141	16.0317		12.6333	-0.690307	-1.57323	0.192618	7.6484	4.06759	11.2292	16.0317	12.1556	19.9078
													12.6667	-0.848426	6.60048	1.6523	-1.20259	-0.679383	9.99917	6.62977	10.4203	10.6956	8.87514	11.3125	10.4503	21.84	16.3932	16.0361		12.6667	-0.70298	-1.58787	0.181914	7.6016	4.03174	11.1715	16.0361	12.1625	19.9098
													12.7	-0.853464	6.53843	1.5821	-1.17869	-0.689714	9.97745	6.55797	10.3959	10.6227	8.74757	11.2599	10.4054	21.8367	16.5287	16.0313		12.7	-0.723994	-1.61085	0.162856	7.55623	3.9989	11.1136	16.0314	12.1646	19.8981
													12.7333	-0.854154	6.47504	1.50867	-1.16146	-0.702651	9.93239	6.46897	10.3618	10.5385	8.62316	11.2086	10.3505	21.7967	16.6441	16.0091		12.7333	-0.747174	-1.63665	0.1423	7.50688	3.97049	11.0433	16.0091	12.1536	19.8645
													12.7667	-0.855289	6.42388	1.43463	-1.13533	-0.714391	9.85554	6.37645	10.3346	10.4425	8.50954	11.1576	10.2936	21.7362	16.7032	16.0079		12.7667	-0.767497	-1.66063	0.125633	7.45391	3.93907	10.9687	16.0079	12.1618	19.854
													12.8	-0.856047	6.39444	1.3754	-1.09612	-0.729693	9.75181	6.28784	10.282	10.3377	8.4066	11.0992	10.2344	21.6467	16.7112	16.001		12.8	-0.784412	-1.68213	0.113307	7.3933	3.90556	10.881	16.001	12.1668	19.8351
													12.8333	-0.85541	6.36547	1.3242	-1.06222	-0.745389	9.62161	6.18815	10.2156	10.226	8.31506	11.0481	10.1779	21.5234	16.7028	15.9862		12.8333	-0.79521	-1.6985	0.10808	7.32262	3.86644	10.7788	15.9862	12.1562	19.8162
													12.8667	-0.860578	6.34352	1.28553	-1.02571	-0.764999	9.48014	6.08354	10.1509	10.1086	8.23044	11.0266	10.1344	21.385	16.6715	15.9779		12.8667	-0.806716	-1.71608	0.102646	7.2436	3.81845	10.6687	15.9779	12.1491	19.8067
													12.9	-0.868523	6.32971	1.24986	-0.989867	-0.784424	9.32229	5.98259	10.0724	9.98318	8.14305	11.0075	10.1115	21.2283	16.6098	15.9772		12.9	-0.821355	-1.7373	0.0945878	7.15602	3.76425	10.5478	15.9772	12.1481	19.8063
													12.9333	-0.873261	6.30733	1.20739	-0.955894	-0.805683	9.15384	5.87203	9.98485	9.85276	8.04684	10.9802	10.1147	21.0501	16.5321	15.9837		12.9333	-0.835633	-1.75656	0.0852985	7.06176	3.70693	10.4166	15.9837	12.1518	19.8156
													12.9667	-0.881863	6.2846	1.17817	-0.922814	-0.82313	8.98664	5.76048	9.87315	9.71906	7.94879	10.9576	10.1394	20.8455	16.4264	16.0131		12.9667	-0.851403	-1.77701	0.0742048	6.96918	3.64764	10.2907	16.0131	12.1762	19.8501
													13	-0.893993	6.27119	1.15367	-0.88822	-0.836402	8.82284	5.64597	9.75674	9.57681	7.84413	10.9243	10.1773	20.5923	16.2867	16.0309		13	-0.868417	-1.79683	0.0599968	6.87437	3.58574	10.163	16.0309	12.1902	19.8716
													13.0333	-0.904674	6.27294	1.1472	-0.867285	-0.856487	8.65675	5.53604	9.63957	9.43409	7.74236	10.8935	10.2328	20.3103	16.1352	16.0738		13.0333	-0.878752	-1.80932	0.0518129	6.7701	3.51537	10.0248	16.0738	12.2239	19.9236
													13.0667	-0.919894	6.28024	1.14654	-0.852614	-0.877538	8.48678	5.42796	9.51994	9.29567	7.63922	10.8631	10.3083	20.0277	15.9711	16.1158		13.0667	-0.889126	-1.82102	0.0427656	6.66887	3.44429	9.89344	16.1158	12.253	19.9787
													13.1	-0.939912	6.29095	1.15243	-0.858634	-0.904067	8.3281	5.32396	9.40549	9.16094	7.53274	10.8373	10.3877	19.7548	15.8048	16.1325		13.1	-0.899364	-1.83125	0.0325217	6.58039	3.38523	9.77555	16.1325	12.2554	20.0095
													13.1333	-0.964522	6.30605	1.15113	-0.875632	-0.932452	8.17992	5.22712	9.30397	9.03081	7.41869	10.821	10.4719	19.5043	15.6562	16.1546		13.1333	-0.907544	-1.83864	0.0235532	6.48227	3.31679	9.64774	16.1546	12.2614	20.0479
													13.1667	-0.987037	6.3192	1.1423	-0.891357	-0.953737	8.03967	5.14535	9.20032	8.90917	7.30763	10.8088	10.5519	19.2891	15.5269	16.1689		13.1667	-0.920057	-1.84873	0.0086217	6.38069	3.24515	9.51624	16.1689	12.2637	20.0742
													13.2	-1.00272	6.33145	1.13651	-0.913595	-0.971276	7.90215	5.06898	9.09366	8.79998	7.20373	10.781	10.5959	19.1102	15.4001	16.1658		13.2	-0.932253	-1.85688	-0.00762948	6.27774	3.17358	9.3819	16.1658	12.2547	20.077
													13.2333	-1.0153	6.33875	1.12465	-0.945924	-0.992758	7.7702	4.99493	8.98392	8.70561	7.10646	10.7616	10.6162	18.969	15.3068	16.1432		13.2333	-0.949972	-1.86833	-0.0316188	6.17339	3.10176	9.24501	16.1432	12.2274	20.0591
													13.2667	-1.02567	6.35159	1.10184	-0.980368	-1.01731	7.6555	4.92356	8.86968	8.62405	7.02803	10.7362	10.6017	18.8705	15.2268	16.1008		13.2667	-0.970633	-1.88325	-0.0580109	6.07944	3.03794	9.12094	16.1008	12.1802	20.0213
													13.3	-1.03717	6.36531	1.07592	-1.01879	-1.0487	7.55249	4.85424	8.77252	8.55174	6.95829	10.7056	10.5549	18.7997	15.154	16.0316		13.3	-0.995264	-1.89991	-0.0906207	5.99033	2.97629	9.00437	16.0316	12.1134	19.9498
													13.3333	-1.05067	6.36626	1.04007	-1.06408	-1.08619	7.46368	4.78934	8.68242	8.49837	6.89903	10.6852	10.4929	18.7629	15.0877	15.9611		13.3333	-1.01301	-1.91181	-0.114215	5.88719	2.90076	8.87361	15.9611	12.0475	19.8746
													13.3667	-1.06778	6.36643	0.987428	-1.10765	-1.11981	7.39449	4.72169	8.59782	8.45838	6.84473	10.6581	10.409	18.7462	15.0349	15.8779		13.3667	-1.0327	-1.92548	-0.139923	5.79296	2.82982	8.75609	15.8779	11.9708	19.785
													13.4	-1.08179	6.36655	0.927507	-1.14927	-1.15385	7.35735	4.65011	8.54073	8.42741	6.7912	10.6319	10.3042	18.7643	14.9576	15.7899		13.4	-1.04984	-1.93713	-0.162542	5.70699	2.75988	8.65411	15.7899	11.8909	19.6889
													13.4333	-1.08876	6.35292	0.858729	-1.17556	-1.18539	7.34312	4.57604	8.489	8.40084	6.73325	10.5977	10.1983	18.7941	14.8512	15.6922		13.4333	-1.06524	-1.94896	-0.181523	5.61651	2.68651	8.54651	15.6922	11.8017	19.5827
													13.4667	-1.09737	6.32587	0.780638	-1.19569	-1.2164	7.34523	4.50556	8.43647	8.37343	6.67542	10.5569	10.0788	18.8335	14.7453	15.5967		13.4667	-1.08904	-1.96756	-0.210524	5.53761	2.61992	8.45529	15.5967	11.7135	19.4798
													13.5	-1.10563	6.28825	0.692358	-1.21518	-1.25167	7.35565	4.42331	8.39102	8.34729	6.61088	10.507	9.93158	18.8882	14.6134	15.5287		13.5	-1.11606	-1.9917	-0.240425	5.47627	2.56777	8.38476	15.5287	11.65	19.4074
													13.5333	-1.11371	6.2487	0.585016	-1.2126	-1.28775	7.37763	4.33762	8.35027	8.32104	6.53153	10.4616	9.78975	18.9517	14.481	15.472		13.5333	-1.14474	-2.01938	-0.27011	5.41733	2.518	8.31666	15.472	11.5944	19.3495
													13.5667	-1.12436	6.20344	0.480676	-1.19216	-1.32432	7.40555	4.25406	8.31755	8.29175	6.45543	10.4173	9.63987	19.0101	14.3421	15.4388		13.5667	-1.16975	-2.04503	-0.294463	5.36615	2.47625	8.25605	15.4388	11.5619	19.3157
													13.6	-1.13311	6.16424	0.392006	-1.15813	-1.35752	7.42886	4.16934	8.29755	8.26216	6.3724	10.3763	9.4848	19.0425	14.2051	15.3975		13.6	-1.18918	-2.06842	-0.309946	5.31781	2.43532	8.2003	15.3975	11.5217	19.2734
													13.6333	-1.14809	6.12831	0.297399	-1.11965	-1.3823	7.45176	4.08339	8.27602	8.2314	6.2781	10.3284	9.33742	19.0634	14.0837	15.3647		13.6333	-1.20643	-2.09306	-0.319797	5.26871	2.39516	8.14226	15.3647	11.4849	19.2445
													13.6667	-1.16606	6.08772	0.219566	-1.09493	-1.40385	7.46529	3.99829	8.25202	8.20075	6.1871	10.269	9.19843	19.07	13.9999	15.3603		13.6667	-1.2294	-2.12398	-0.334832	5.23529	2.368	8.10257	15.3602	11.4741	19.2464
													13.7	-1.1843	6.04739	0.146711	-1.07154	-1.43028	7.46352	3.90573	8.23179	8.16753	6.09302	10.2114	9.07024	19.0715	13.9603	15.3601		13.7	-1.25839	-2.16092	-0.355855	5.20773	2.34175	8.07371	15.3601	11.4631	19.257
													13.7333	-1.20411	6.00581	0.0797496	-1.03268	-1.45388	7.45509	3.81527	8.18535	8.13085	5.99058	10.1621	8.95582	19.0313	13.9675	15.3613		13.7333	-1.29034	-2.19972	-0.380956	5.18893	2.31986	8.05801	15.3613	11.4531	19.2696
													13.7667	-1.22598	5.97285	0.0181698	-0.996626	-1.4774	7.44083	3.72954	8.13201	8.09004	5.89654	10.134	8.85483	18.9398	14.0251	15.3685		13.7667	-1.32485	-2.23947	-0.41023	5.18966	2.30493	8.0744	15.3685	11.4478	19.2892
													13.8	-1.24139	5.94057	-0.0412899	-0.967653	-1.49303	7.42162	3.63671	8.06891	8.04832	5.80903	10.1034	8.75836	18.791	14.1132	15.3567		13.8	-1.35658	-2.27862	-0.434529	5.21952	2.30938	8.12966	15.3567	11.4252	19.2882
													13.8333	-1.25621	5.91825	-0.0925274	-0.953663	-1.49831	7.39522	3.54408	7.99853	7.99746	5.7167	10.0785	8.66692	18.5963	14.2317	15.312		13.8333	-1.38482	-2.31246	-0.457191	5.25256	2.30929	8.19583	15.312	11.3764	19.2476
													13.8667	-1.27835	5.89578	-0.129293	-0.969835	-1.49858	7.35764	3.45808	7.92688	7.93827	5.62135	10.0598	8.57903	18.357	14.364	15.257		13.8667	-1.41424	-2.34514	-0.483337	5.30057	2.31749	8.28365	15.257	11.3171	19.1968
													13.9	-1.30357	5.88324	-0.158815	-1.00666	-1.49346	7.31546	3.37196	7.85413	7.86931	5.52185	10.0437	8.49156	18.0828	14.5062	15.1911		13.9	-1.44621	-2.37925	-0.513161	5.36834	2.33896	8.39773	15.1911	11.2458	19.1363
													13.9333	-1.33418	5.86321	-0.186562	-1.07091	-1.48359	7.26447	3.29518	7.77971	7.78767	5.4175	10.0225	8.39111	17.8027	14.6653	15.1406		13.9333	-1.479	-2.41151	-0.546486	5.45275	2.37459	8.53092	15.1406	11.1858	19.0954
													13.9667	-1.36265	5.84028	-0.209023	-1.1379	-1.47148	7.19739	3.22062	7.70531	7.69624	5.32407	10.004	8.28535	17.5196	14.843	15.0797		13.9667	-1.51035	-2.44111	-0.579588	5.55409	2.42173	8.68646	15.0797	11.1164	19.0429
													14	-1.3838	5.83018	-0.233382	-1.19353	-1.45661	7.12842	3.15061	7.63023	7.60216	5.23628	9.97702	8.16489	17.224	15.0091	14.9926		14	-1.54614	-2.47203	-0.620242	5.67117	2.48275	8.85958	14.9926	11.0248	18.9605
													14.0333	-1.40484	5.81489	-0.254334	-1.2378	-1.43971	7.06418	3.08677	7.54329	7.5062	5.14358	9.93399	8.03773	16.9155	15.1281	14.9003		14.0333	-1.57488	-2.49574	-0.65402	5.8018	2.56117	9.04243	14.9004	10.9323	18.8684
													14.0667	-1.42675	5.79301	-0.282119	-1.27664	-1.42336	6.99706	3.02297	7.45925	7.41128	5.055	9.8726	7.91307	16.6277	15.2035	14.8082		14.0667	-1.59726	-2.51601	-0.678517	5.93118	2.64613	9.21623	14.8082	10.8378	18.7787
													14.1	-1.45358	5.76661	-0.31095	-1.3096	-1.40879	6.92214	2.95258	7.37525	7.3139	4.96968	9.80644	7.78242	16.3707	15.2522	14.6984		14.1	-1.61696	-2.53518	-0.698749	6.04606	2.72605	9.36606	14.6984	10.7311	18.6657
													14.1333	-1.48819	5.74561	-0.341498	-1.32947	-1.39907	6.8493	2.88592	7.29386	7.21869	4.8805	9.74404	7.65512	16.1415	15.2481	14.5839		14.1333	-1.63979	-2.55291	-0.72666	6.13872	2.79326	9.48418	14.5839	10.6188	18.5489
													14.1667	-1.52482	5.72557	-0.378708	-1.32392	-1.4005	6.78729	2.81613	7.20289	7.1259	4.79818	9.69152	7.55367	15.9325	15.1805	14.4726		14.1667	-1.66495	-2.5737	-0.756205	6.22894	2.86014	9.59773	14.4726	10.5034	18.4417
													14.2	-1.56012	5.71522	-0.427103	-1.30018	-1.40322	6.7369	2.72286	7.0986	7.03861	4.72695	9.63333	7.4769	15.754	15.0999	14.3653		14.2	-1.68442	-2.59197	-0.776881	6.32323	2.93071	9.71574	14.3653	10.3946	18.3361
													14.2333	-1.58975	5.69974	-0.483116	-1.25768	-1.40656	6.69082	2.62874	6.97879	6.95417	4.65476	9.56184	7.42433	15.6079	15.0023	14.2683		14.2333	-1.69065	-2.59989	-0.781406	6.39165	2.98524	9.79805	14.2683	10.2923	18.2442
													14.2667	-1.61866	5.67714	-0.538634	-1.19847	-1.41527	6.64767	2.53389	6.84038	6.86858	4.59662	9.49144	7.40926	15.4727	14.8689	14.1709		14.2667	-1.68784	-2.60018	-0.775512	6.44641	3.02937	9.86344	14.1709	10.1934	18.1484
													14.3	-1.65091	5.65203	-0.598016	-1.13985	-1.42854	6.62111	2.4389	6.69636	6.78741	4.5413	9.42399	7.42979	15.3449	14.7015	14.0775		14.3	-1.68408	-2.59857	-0.769586	6.4927	3.06816	9.91724	14.0775	10.1016	18.0533
													14.3333	-1.68504	5.62097	-0.658702	-1.06824	-1.44593	6.6076	2.33909	6.55604	6.69739	4.48841	9.36435	7.4838	15.2377	14.5157	13.9966		14.3333	-1.67238	-2.59085	-0.753913	6.52534	3.09886	9.95183	13.9966	10.0178	17.9753
													14.3667	-1.71844	5.59136	-0.720198	-0.994894	-1.46201	6.60772	2.2311	6.41744	6.60563	4.44421	9.32425	7.55928	15.1654	14.3143	13.9289		14.3667	-1.65812	-2.58112	-0.735115	6.53589	3.10892	9.96286	13.9289	9.94675	17.911
													14.4	-1.75394	5.55796	-0.79072	-0.91698	-1.47401	6.61252	2.12231	6.28301	6.51363	4.41399	9.2952	7.65085	15.0852	14.1384	13.8627		14.4	-1.64553	-2.57216	-0.718908	6.52923	3.10859	9.94987	13.8627	9.8806	17.8448
													14.4333	-1.78352	5.51859	-0.858839	-0.82859	-1.48465	6.6306	2.01993	6.15911	6.42042	4.39359	9.26423	7.75985	14.9963	13.9833	13.8098		14.4333	-1.63492	-2.56461	-0.705228	6.51566	3.10429	9.92703	13.8098	9.82509	17.7945
													14.4667	-1.80562	5.47727	-0.919941	-0.746227	-1.4895	6.66135	1.92521	6.03693	6.32421	4.39292	9.23267	7.88623	14.9157	13.863	13.7733		14.4667	-1.62041	-2.55566	-0.685161	6.49957	3.10212	9.89702	13.7733	9.78752	17.759
													14.5	-1.82723	5.43742	-0.978224	-0.674752	-1.4845	6.70574	1.85228	5.93535	6.22486	4.41962	9.19156	8.01154	14.825	13.7877	13.7424		14.5	-1.60081	-2.54077	-0.660851	6.47952	3.10135	9.85768	13.7424	9.75766	17.7272
													14.5333	-1.85382	5.3873	-1.03235	-0.61022	-1.47609	6.7621	1.79323	5.84209	6.11562	4.45618	9.15892	8.11973	14.7069	13.7269	13.7071		14.5333	-1.58763	-2.52913	-0.646131	6.44092	3.09007	9.79178	13.7071	9.72097	17.6932
													14.5667	-1.88167	5.33308	-1.08614	-0.552692	-1.45937	6.82299	1.73892	5.77614	6.01044	4.50264	9.14444	8.20583	14.5777	13.6725	13.6702		14.5667	-1.58774	-2.52825	-0.647228	6.40084	3.07715	9.72453	13.6702	9.68549	17.6549
													14.6	-1.90733	5.28153	-1.14158	-0.505226	-1.43588	6.89331	1.67295	5.73323	5.9101	4.55785	9.1299	8.27966	14.4494	13.6238	13.6311		14.6	-1.59481	-2.53307	-0.656549	6.34621	3.06228	9.63013	13.6311	9.64637	17.6158
													14.6333	-1.92001	5.2175	-1.18573	-0.467162	-1.40864	6.9673	1.61605	5.69268	5.80784	4.62903	9.10813	8.3288	14.3165	13.6065	13.5956		14.6333	-1.60265	-2.54012	-0.665181	6.28467	3.0445	9.52484	13.5956	9.60869	17.5825
													14.6667	-1.92317	5.16281	-1.22734	-0.44377	-1.37516	7.03979	1.56526	5.65787	5.70644	4.71845	9.08687	8.34528	14.1767	13.5956	13.5484		14.6667	-1.61009	-2.54771	-0.67248	6.22459	3.02954	9.41963	13.5484	9.56616	17.5306
													14.7	-1.92185	5.10083	-1.26729	-0.432222	-1.33503	7.09298	1.52553	5.62991	5.60211	4.81822	9.06671	8.35737	14.02	13.6058	13.4849		14.7	-1.62127	-2.55947	-0.68307	6.1728	3.02679	9.31881	13.4849	9.50775	17.462
													14.7333	-1.91399	5.05424	-1.28547	-0.445593	-1.29601	7.13977	1.50156	5.6244	5.49598	4.93062	9.04908	8.37043	13.885	13.6238	13.4367		14.7333	-1.63403	-2.57311	-0.694943	6.12911	3.02764	9.23058	13.4367	9.46129	17.412
													14.7667	-1.90474	5.00694	-1.2998	-0.476609	-1.25006	7.17317	1.4826	5.62453	5.38971	5.0474	9.02517	8.37543	13.7936	13.6332	13.4188		14.7667	-1.64674	-2.58564	-0.707845	6.08922	3.02718	9.15126	13.4188	9.43936	17.3982
													14.8	-1.89133	4.96338	-1.30945	-0.509049	-1.20038	7.20121	1.47464	5.63303	5.28433	5.15781	9.00993	8.37914	13.742	13.6375	13.4146		14.8	-1.65898	-2.59694	-0.72102	6.0536	3.0213	9.0859	13.4146	9.42678	17.4025
													14.8333	-1.87525	4.91792	-1.31485	-0.547171	-1.14935	7.22811	1.47041	5.64801	5.1853	5.24503	8.98859	8.38053	13.7297	13.6415	13.4329		14.8333	-1.672	-2.60888	-0.735124	6.0222	3.01913	9.02528	13.4329	9.43782	17.428
													14.8667	-1.85492	4.86504	-1.32277	-0.578395	-1.09857	7.24665	1.47222	5.67302	5.1047	5.33168	8.95567	8.38053	13.764	13.6382	13.4705		14.8667	-1.67838	-2.61432	-0.742443	5.99816	3.02218	8.97414	13.4705	9.46946	17.4715
													14.9	-1.83382	4.82189	-1.33168	-0.608676	-1.05467	7.25628	1.4921	5.68772	5.03818	5.42533	8.93146	8.40148	13.8174	13.6289	13.5153		14.9	-1.67804	-2.61406	-0.742006	5.98316	3.02726	8.93905	13.5153	9.50859	17.5221
													14.9333	-1.81759	4.77883	-1.33249	-0.636682	-1.01521	7.25439	1.53353	5.70861	4.98223	5.50552	8.92922	8.43239	13.8779	13.6297	13.5565		14.9333	-1.67249	-2.6097	-0.735266	5.96835	3.02086	8.91585	13.5565	9.54758	17.5654
													14.9667	-1.81098	4.74744	-1.33209	-0.66754	-0.975155	7.24131	1.57857	5.73172	4.93057	5.57466	8.93058	8.48337	13.9463	13.6125	13.5946		14.9667	-1.65831	-2.59708	-0.719541	5.95107	3.00973	8.89242	13.5946	9.58435	17.6048
													15	-1.81138	4.71551	-1.3238	-0.715012	-0.936862	7.21617	1.63072	5.7552	4.88764	5.62959	8.94638	8.55105	14.0164	13.5932	13.6494		15	-1.641	-2.58288	-0.699123	5.94001	2.99541	8.88461	13.6493	9.63776	17.6609
													15.0333	-1.81521	4.68198	-1.31897	-0.772733	-0.897786	7.1945	1.67921	5.77594	4.853	5.67393	8.9859	8.61485	14.0762	13.5645	13.6994		15.0333	-1.61563	-2.56174	-0.66951	5.94611	2.98989	8.90232	13.6993	9.69065	17.7081
													15.0667	-1.8215	4.6436	-1.32631	-0.813084	-0.860365	7.16778	1.72181	5.78668	4.82626	5.6983	9.03206	8.66563	14.1004	13.5202	13.72		15.0667	-1.58841	-2.53764	-0.639181	5.96694	2.98965	8.94422	13.72	9.71876	17.7212
													15.1	-1.82912	4.60789	-1.33014	-0.847816	-0.827986	7.13662	1.75887	5.78472	4.80792	5.70096	9.10052	8.7145	14.0609	13.4603	13.733		15.1	-1.55439	-2.50868	-0.60009	5.99987	2.99317	9.00657	13.733	9.74579	17.7202
													15.1333	-1.84522	4.56922	-1.33201	-0.869274	-0.809661	7.09666	1.77274	5.78763	4.79177	5.69009	9.15402	8.76563	13.9621	13.4009	13.7313		15.1333	-1.51607	-2.47474	-0.557392	6.03104	2.99174	9.07035	13.7313	9.76026	17.7023
													15.1667	-1.86198	4.53574	-1.324	-0.883246	-0.798329	7.04664	1.7764	5.78036	4.77545	5.67652	9.20865	8.82197	13.8323	13.3311	13.7211		15.1667	-1.47429	-2.43757	-0.51102	6.06117	2.98478	9.13756	13.7211	9.76643	17.6757
													15.2	-1.87704	4.50928	-1.30843	-0.90758	-0.790489	6.9971	1.77347	5.7691	4.74896	5.65749	9.29525	8.88944	13.661	13.258	13.6946		15.2	-1.42831	-2.39725	-0.45937	6.08309	2.96924	9.19694	13.6946	9.75743	17.6317
													15.2333	-1.88922	4.47689	-1.29122	-0.939275	-0.779973	6.95432	1.75809	5.7594	4.70797	5.62438	9.36625	8.95724	13.4392	13.1987	13.657		15.2333	-1.37867	-2.352	-0.405352	6.0938	2.94837	9.23923	13.657	9.73648	17.5774
													15.2667	-1.89618	4.45245	-1.27741	-0.97562	-0.76669	6.92258	1.73598	5.74293	4.65832	5.58774	9.40758	9.01153	13.204	13.148	13.624		15.2667	-1.32728	-2.30573	-0.34884	6.09059	2.91955	9.26163	13.624	9.71747	17.5304
													15.3	-1.89751	4.41216	-1.2626	-1.00202	-0.748124	6.89771	1.70743	5.73915	4.60908	5.53589	9.44945	9.05438	12.9442	13.0978	13.5879		15.3	-1.27815	-2.25952	-0.296786	6.07357	2.87774	9.26941	13.5879	9.69539	17.4804
													15.3333	-1.89374	4.37452	-1.26076	-1.00275	-0.731348	6.8861	1.67782	5.73105	4.55424	5.47741	9.48559	9.10512	12.6633	13.0575	13.537		15.3333	-1.23382	-2.21494	-0.252699	6.04329	2.82881	9.25776	13.537	9.65777	17.4162
													15.3667	-1.8829	4.33957	-1.2391	-0.994076	-0.722626	6.88524	1.6538	5.72184	4.49649	5.41894	9.49717	9.16339	12.3715	13.0295	13.4975		15.3667	-1.19443	-2.1732	-0.215654	5.98332	2.75702	9.20962	13.4975	9.6296	17.3654
													15.4	-1.86529	4.30429	-1.19809	-0.997541	-0.712818	6.88122	1.63084	5.71225	4.43474	5.36365	9.49223	9.22617	12.0648	12.9962	13.4766		15.4	-1.15374	-2.13086	-0.17662	5.90617	2.67798	9.13437	13.4766	9.61643	17.3368
													15.4333	-1.84278	4.27974	-1.15365	-1.00724	-0.705883	6.8799	1.63004	5.70109	4.37025	5.31946	9.46319	9.29039	11.7691	12.9868	13.4459		15.4333	-1.11393	-2.08818	-0.139686	5.81243	2.59045	9.03442	13.4459	9.59155	17.3002
													15.4667	-1.81387	4.25372	-1.10816	-1.02755	-0.694405	6.88274	1.646	5.6861	4.30152	5.28002	9.43234	9.33332	11.4707	12.9703	13.407		15.4667	-1.07477	-2.04756	-0.101983	5.70885	2.5054	8.91229	13.407	9.55778	17.2561
													15.5	-1.7797	4.23397	-1.07353	-1.03972	-0.681546	6.87549	1.6643	5.66437	4.22343	5.24942	9.39424	9.35885	11.1563	12.9454	13.3562		15.5	-1.03983	-2.01191	-0.067749	5.59871	2.41684	8.78057	13.3562	9.51172	17.2007
													15.5333	-1.74075	4.2198	-1.03757	-1.03991	-0.670173	6.86333	1.68516	5.63411	4.14507	5.21364	9.32027	9.37098	10.8456	12.9115	13.3176		15.5333	-1.0101	-1.98121	-0.0389824	5.49411	2.33159	8.65662	13.3176	9.47459	17.1606
													15.5667	-1.70331	4.21126	-0.986893	-1.03465	-0.659615	6.85268	1.71087	5.61645	4.06909	5.18703	9.23979	9.37524	10.561	12.8729	13.2851		15.5667	-0.992624	-1.95989	-0.0253617	5.39745	2.24928	8.54563	13.2851	9.44398	17.1262
													15.6	-1.65881	4.20261	-0.925863	-1.0151	-0.65576	6.83532	1.74201	5.59688	3.99219	5.17065	9.1754	9.37425	10.2652	12.8077	13.2526		15.6	-0.981796	-1.94378	-0.0198122	5.3153	2.17865	8.45195	13.2527	9.41549	17.0898
													15.6333	-1.60765	4.20882	-0.859387	-0.984442	-0.66739	6.80906	1.77571	5.55219	3.9145	5.16438	9.117	9.38084	9.97307	12.735	13.2181		15.6333	-0.97174	-1.92958	-0.0139034	5.2525	2.12641	8.37859	13.2181	9.38594	17.0502
													15.6667	-1.55673	4.20829	-0.786067	-0.942879	-0.685809	6.77498	1.81436	5.48503	3.83884	5.15076	9.05167	9.37029	9.70008	12.658	13.187		15.6667	-0.960906	-1.91503	-0.00678421	5.19134	2.07674	8.30594	13.187	9.36055	17.0134
													15.7	-1.50557	4.2054	-0.728862	-0.879694	-0.705511	6.73544	1.85038	5.41594	3.75619	5.15079	8.99115	9.34146	9.44622	12.5556	13.169		15.7	-0.945105	-1.89611	0.00590451	5.12557	2.02209	8.22905	13.169	9.34608	16.992
													15.7333	-1.46016	4.20169	-0.684236	-0.8005	-0.728254	6.69466	1.89071	5.33176	3.66663	5.16042	8.93922	9.30642	9.21304	12.4486	13.1563		15.7333	-0.927133	-1.87623	0.0219663	5.07553	1.97617	8.17489	13.1563	9.33678	16.9758
													15.7667	-1.4183	4.19478	-0.640627	-0.705337	-0.752346	6.65531	1.92936	5.23706	3.57735	5.18382	8.90231	9.26757	8.99469	12.3379	13.1579		15.7667	-0.912189	-1.85842	0.0340453	5.04089	1.94449	8.13728	13.1579	9.34005	16.9757
													15.8	-1.3779	4.19042	-0.595143	-0.598762	-0.780689	6.60612	1.96105	5.13712	3.49344	5.21267	8.8774	9.22348	8.806	12.2168	13.1903		15.8	-0.902877	-1.84338	0.0376249	5.02646	1.9265	8.12643	13.1903	9.37082	17.0098
													15.8333	-1.33827	4.17582	-0.539628	-0.508487	-0.822361	6.5466	1.9828	5.03613	3.41921	5.24258	8.8533	9.17924	8.63659	12.0963	13.2239		15.8333	-0.89503	-1.83043	0.0403685	5.0294	1.92036	8.13845	13.2239	9.40356	17.0443
													15.8667	-1.29946	4.15872	-0.482322	-0.422208	-0.867332	6.47928	2.0144	4.9304	3.3432	5.27226	8.84941	9.13926	8.47148	11.9924	13.2568		15.8667	-0.889059	-1.81801	0.0398886	5.04087	1.91948	8.16225	13.2568	9.43966	17.0739
													15.9	-1.26208	4.14013	-0.432722	-0.336418	-0.918123	6.39379	2.0393	4.81395	3.2659	5.29187	8.86769	9.08632	8.31135	11.8689	13.2988		15.9	-0.881986	-1.80728	0.0433085	5.06291	1.9275	8.19833	13.2988	9.48572	17.112
													15.9333	-1.23117	4.11781	-0.383121	-0.272984	-0.969404	6.30259	2.05573	4.68876	3.19343	5.30035	8.89368	9.03514	8.16505	11.7456	13.3428		15.9333	-0.87239	-1.79525	0.0504664	5.09258	1.94044	8.24472	13.3428	9.53308	17.1526
													15.9667	-1.21386	4.0953	-0.339155	-0.23114	-1.01871	6.20715	2.06944	4.57829	3.12537	5.29454	8.94601	8.97782	8.02965	11.6274	13.4039		15.9667	-0.865484	-1.78601	0.0550399	5.12608	1.95671	8.29545	13.4039	9.59545	17.2123
													16	-1.20466	4.0718	-0.292828	-0.211496	-1.06825	6.09995	2.06378	4.48611	3.0586	5.27596	9.02759	8.9095	7.91499	11.4994	13.4695		16	-0.857822	-1.77659	0.0609489	5.17202	1.98698	8.35706	13.4696	9.66035	17.2788
													16.0333	-1.1986	4.04739	-0.238048	-0.210103	-1.12144	5.98513	2.06335	4.38846	2.99723	5.24102	9.1162	8.84017	7.82242	11.3781	13.5219		16.0333	-0.863444	-1.77964	0.0527571	5.24339	2.03959	8.4472	13.5219	9.71416	17.3297
													16.0667	-1.19037	4.02488	-0.175796	-0.212898	-1.1812	5.87494	2.06813	4.30622	2.94721	5.18519	9.21337	8.76611	7.74684	11.2718	13.5779		16.0667	-0.882113	-1.79333	0.0291025	5.29915	2.0827	8.51561	13.5779	9.77024	17.3856
													16.1	-1.17782	4.00044	-0.127534	-0.219967	-1.2417	5.7596	2.0463	4.23034	2.9069	5.10531	9.31252	8.67088	7.69367	11.1658	13.6185		16.1	-0.905552	-1.81171	0.000607485	5.34289	2.11293	8.57286	13.6185	9.81119	17.4257
													16.1333	-1.15973	3.98223	-0.0938379	-0.23906	-1.29873	5.65008	2.01992	4.15719	2.87545	5.02031	9.4067	8.58007	7.64609	11.0515	13.6365		16.1333	-0.928568	-1.83173	-0.025405	5.36966	2.12899	8.61033	13.6365	9.8319	17.4411
													16.1667	-1.14342	3.96499	-0.0659311	-0.249324	-1.34854	5.54884	1.9998	4.09079	2.85193	4.91729	9.51149	8.48483	7.61028	10.9291	13.6679		16.1667	-0.952621	-1.8519	-0.053346	5.37718	2.13256	8.62181	13.6679	9.86252	17.4733
													16.2	-1.1327	3.93982	-0.0400194	-0.258147	-1.39765	5.44862	1.95796	4.02872	2.83991	4.81421	9.61076	8.37107	7.56712	10.8086	13.6803		16.2	-0.979585	-1.87625	-0.0829216	5.3706	2.12954	8.61166	13.6803	9.87563	17.4849
													16.2333	-1.12378	3.91774	-0.0162167	-0.264909	-1.44532	5.36034	1.9183	3.96989	2.83099	4.71439	9.69857	8.24531	7.52096	10.6943	13.6768		16.2333	-1.01127	-1.90477	-0.117766	5.349	2.11652	8.58149	13.6768	9.8714	17.4823
													16.2667	-1.11736	3.89424	-0.0056599	-0.248951	-1.47911	5.27705	1.87813	3.91412	2.82653	4.61813	9.77823	8.12167	7.46863	10.6115	13.6621		16.2667	-1.05593	-1.9446	-0.167255	5.3161	2.09313	8.53908	13.6621	9.85591	17.4684
													16.3	-1.1097	3.87168	-0.000370378	-0.221362	-1.50679	5.19948	1.83516	3.86769	2.81738	4.53005	9.8454	7.9768	7.41651	10.559	13.6398		16.3	-1.1038	-1.9882	-0.219399	5.27942	2.06392	8.49492	13.6398	9.8327	17.4469
													16.3333	-1.09755	3.85288	-0.00286367	-0.179693	-1.52119	5.14097	1.81022	3.82666	2.81047	4.4641	9.89815	7.82359	7.35154	10.5283	13.6131		16.3333	-1.15908	-2.03945	-0.278712	5.23807	2.02681	8.44934	13.6131	9.80239	17.4237
													16.3667	-1.0878	3.83924	-0.0127309	-0.131232	-1.52536	5.09191	1.79138	3.79973	2.81006	4.39812	9.94646	7.67511	7.26371	10.5296	13.5875		16.3667	-1.21254	-2.08921	-0.335881	5.18158	1.97715	8.386	13.5875	9.77258	17.4024
													16.4	-1.07867	3.82507	-0.0288385	-0.0812946	-1.52156	5.0443	1.75861	3.77722	2.80569	4.33402	9.97468	7.52463	7.16255	10.5515	13.5665		16.4	-1.26353	-2.13813	-0.388926	5.12238	1.92131	8.32345	13.5665	9.74783	17.3851
													16.4333	-1.07845	3.81024	-0.0395439	-0.0357505	-1.51103	4.99475	1.74537	3.7607	2.79709	4.27373	9.99728	7.38139	7.04661	10.573	13.5438		16.4333	-1.31689	-2.19071	-0.443064	5.06725	1.87294	8.26156	13.5438	9.72041	17.3672
													16.4667	-1.09403	3.7972	-0.0393518	0.00888752	-1.49264	4.93182	1.74096	3.75176	2.78438	4.22095	10.0217	7.24172	6.90999	10.617	13.519		16.4667	-1.37353	-2.24645	-0.500613	5.0061	1.82025	8.19194	13.519	9.69229	17.3457
													16.5	-1.11635	3.78763	-0.0309589	0.0524565	-1.46547	4.86618	1.75241	3.74619	2.76435	4.18911	10.0474	7.10978	6.76055	10.6836	13.4789		16.5	-1.43454	-2.30562	-0.563455	4.95087	1.77351	8.12822	13.4789	9.64875	17.309
													16.5333	-1.14135	3.78439	-0.0108041	0.0917903	-1.43378	4.79977	1.7925	3.75412	2.74579	4.17617	10.0726	6.98216	6.62584	10.7257	13.4414		16.5333	-1.49364	-2.36247	-0.624818	4.89376	1.72412	8.0634	13.4414	9.60493	17.2778
													16.5667	-1.164	3.78033	0.0217848	0.131178	-1.40082	4.72965	1.82718	3.7607	2.72871	4.17644	10.0911	6.87305	6.50853	10.7599	13.4005		16.5667	-1.54775	-2.41544	-0.680068	4.84028	1.67812	8.00245	13.4005	9.56052	17.2404
													16.6	-1.18939	3.77489	0.0539103	0.156252	-1.37042	4.64986	1.87918	3.77241	2.71236	4.19255	10.1238	6.77025	6.40085	10.7864	13.3634		16.6	-1.59623	-2.46384	-0.728619	4.79242	1.63509	7.94975	13.3634	9.51965	17.2071
													16.6333	-1.21674	3.76778	0.0941102	0.161606	-1.3388	4.56458	1.93891	3.77923	2.70472	4.21968	10.1421	6.66291	6.29932	10.7759	13.3262		16.6333	-1.64494	-2.51318	-0.776698	4.7461	1.59304	7.89917	13.3262	9.47777	17.1746
													16.6667	-1.25889	3.75748	0.133453	0.135805	-1.30525	4.46825	2.00307	3.78954	2.70611	4.24304	10.1497	6.56136	6.19577	10.7338	13.2933		16.6667	-1.679	-2.54895	-0.809048	4.70187	1.55753	7.84622	13.2933	9.44137	17.1453
													16.7	-1.30312	3.74769	0.168788	0.0818689	-1.26974	4.35836	2.07695	3.80351	2.70783	4.27615	10.1457	6.46866	6.09347	10.6797	13.2559		16.7	-1.70609	-2.5795	-0.83269	4.65327	1.51894	7.78759	13.2559	9.39864	17.1132
													16.7333	-1.35458	3.72953	0.2074	0.0134723	-1.22913	4.23435	2.13598	3.81134	2.71446	4.33626	10.1437	6.38392	6.0005	10.6006	13.2078		16.7333	-1.72247	-2.60162	-0.843313	4.59968	1.47645	7.72291	13.2078	9.34464	17.071
													16.7667	-1.40497	3.70525	0.238675	-0.059418	-1.18235	4.1056	2.20807	3.82289	2.7192	4.403	10.1276	6.31598	5.9004	10.5052	13.1687		16.7667	-1.72729	-2.61342	-0.841163	4.54424	1.42916	7.65933	13.1687	9.2997	17.0377
													16.8	-1.45389	3.67158	0.255062	-0.133823	-1.13844	3.97964	2.28162	3.83347	2.72288	4.45919	10.1051	6.2678	5.81328	10.4072	13.1362		16.8	-1.72444	-2.61862	-0.830257	4.49339	1.38738	7.5994	13.1362	9.25741	17.0149
													16.8333	-1.50549	3.63005	0.263717	-0.2176	-1.09687	3.85662	2.33378	3.84319	2.73569	4.50019	10.0704	6.23028	5.73613	10.3025	13.1132		16.8333	-1.7148	-2.61762	-0.811977	4.43948	1.3423	7.53667	13.1132	9.22359	17.0028
													16.8667	-1.55863	3.59115	0.258425	-0.301781	-1.05316	3.7342	2.37746	3.84621	2.74377	4.52719	10.0237	6.22113	5.66596	10.2069	13.0946		16.8667	-1.6997	-2.61284	-0.786553	4.3814	1.292	7.4708	13.0946	9.19599	16.9932
													16.9	-1.61901	3.54374	0.237513	-0.387786	-1.00413	3.6049	2.41656	3.84712	2.76052	4.53834	9.97863	6.23781	5.59034	10.1272	13.0724		16.9	-1.67531	-2.60072	-0.749905	4.31677	1.23438	7.39917	13.0724	9.16242	16.9824
													16.9333	-1.67892	3.49223	0.223485	-0.471892	-0.958404	3.47741	2.45094	3.83345	2.78692	4.52576	9.91692	6.26792	5.52152	10.0466	13.041		16.9333	-1.6414	-2.58156	-0.701231	4.25222	1.18262	7.32182	13.041	9.12082	16.9612
													16.9667	-1.73539	3.44006	0.194658	-0.533292	-0.910264	3.36435	2.48835	3.81614	2.82038	4.50507	9.86021	6.32312	5.45622	9.98481	13.0041		16.9667	-1.60484	-2.55977	-0.649905	4.18784	1.1324	7.24328	13.0041	9.07289	16.9353
													17	-1.78523	3.38751	0.162458	-0.570638	-0.867543	3.25752	2.51752	3.78549	2.85227	4.48335	9.81462	6.40028	5.39094	9.95889	12.97		17	-1.57219	-2.54228	-0.602104	4.11153	1.07013	7.15292	12.97	9.02277	16.9173
													17.0333	-1.83603	3.33791	0.123777	-0.586398	-0.827517	3.15768	2.51123	3.74332	2.8869	4.46118	9.77294	6.46467	5.34467	9.93849	12.9479		17.0333	-1.53792	-2.52217	-0.553674	4.04052	1.01312	7.06792	12.9479	8.98372	16.9121
													17.0667	-1.8775	3.29129	0.0718358	-0.59553	-0.790477	3.0682	2.51346	3.70297	2.92394	4.41641	9.72864	6.51775	5.29856	9.92421	12.916		17.0667	-1.50439	-2.50094	-0.507835	3.97952	0.9652	6.99384	12.916	8.9359	16.8961
													17.1	-1.91248	3.24817	0.0237463	-0.605373	-0.762832	2.99367	2.49519	3.65764	2.96336	4.36103	9.67434	6.55755	5.26573	9.92961	12.868		17.1	-1.46858	-2.47725	-0.459903	3.91584	0.915086	6.91659	12.868	8.87289	16.8632
													17.1333	-1.93621	3.20751	-0.00962479	-0.611908	-0.738833	2.93052	2.47583	3.61301	3.00834	4.30158	9.60627	6.57973	5.23819	9.94458	12.8182		17.1333	-1.43161	-2.45296	-0.410269	3.85279	0.862105	6.84347	12.8182	8.80878	16.8276
													17.1667	-1.9454	3.16465	-0.0274809	-0.602905	-0.718674	2.86849	2.47021	3.56967	3.05032	4.24044	9.53987	6.58052	5.21041	9.95544	12.7774		17.1667	-1.38977	-2.42375	-0.355798	3.79451	0.815235	6.77378	12.7774	8.75309	16.8016
													17.2	-1.94609	3.12135	-0.0213338	-0.587844	-0.701599	2.81511	2.47619	3.51988	3.09158	4.17567	9.484	6.54751	5.18863	9.96634	12.7358		17.2	-1.34525	-2.39179	-0.29872	3.74594	0.776686	6.7152	12.7358	8.69548	16.7761
													17.2333	-1.93994	3.07901	0.00529862	-0.550538	-0.685791	2.76851	2.50569	3.46828	3.12761	4.11515	9.44048	6.48013	5.17105	9.97249	12.7091		17.2333	-1.30201	-2.35979	-0.24423	3.70357	0.745111	6.66203	12.7091	8.65325	16.765
													17.2667	-1.92617	3.04253	0.0337222	-0.490548	-0.672438	2.72601	2.54137	3.42458	3.15389	4.05991	9.40851	6.37708	5.16201	9.96769	12.6938		17.2667	-1.2636	-2.32978	-0.197425	3.67366	0.72034	6.62698	12.6938	8.62019	16.7675
													17.3	-1.90722	3.00644	0.0570139	-0.422471	-0.659263	2.67624	2.57389	3.38493	3.1756	4.00899	9.35462	6.25073	5.16888	9.94964	12.6806		17.3	-1.22042	-2.29384	-0.147005	3.6529	0.701661	6.60414	12.6806	8.58945	16.7718
													17.3333	-1.8771	2.96463	0.0764334	-0.336391	-0.648279	2.63083	2.61504	3.35324	3.19254	3.95911	9.28549	6.10244	5.19691	9.92689	12.6691		17.3333	-1.17568	-2.25476	-0.0966068	3.64493	0.69015	6.59971	12.6691	8.56612	16.772
													17.3667	-1.84216	2.91857	0.102188	-0.245226	-0.636977	2.58664	2.67681	3.32629	3.20864	3.90612	9.22409	5.94318	5.21906	9.87568	12.6495		17.3667	-1.13149	-2.21541	-0.0475716	3.63945	0.675558	6.60334	12.6495	8.53728	16.7618
													17.4	-1.81041	2.86991	0.134709	-0.154512	-0.624244	2.5353	2.75235	3.30753	3.22133	3.85862	9.17202	5.78034	5.24011	9.81248	12.6515		17.4	-1.08674	-2.17492	0.00143986	3.64969	0.672869	6.62652	12.6515	8.53047	16.7725
													17.4333	-1.77564	2.82631	0.169168	-0.0735522	-0.610717	2.4758	2.82926	3.29202	3.23925	3.80624	9.14145	5.62389	5.24953	9.72919	12.6479		17.4333	-1.0481	-2.13886	0.0426644	3.67114	0.678496	6.66379	12.6478	8.52089	16.7748
													17.4667	-1.7433	2.77716	0.19452	-0.00976251	-0.595193	2.41585	2.90048	3.27886	3.2628	3.75584	9.12848	5.47878	5.24721	9.6127	12.6303		17.4667	-1.01073	-2.10301	0.0815574	3.70395	0.692399	6.71549	12.6303	8.50258	16.758
													17.5	-1.70809	2.72901	0.195641	0.0467257	-0.576997	2.36606	2.94585	3.26445	3.28705	3.70386	9.11427	5.35159	5.24111	9.47257	12.6101		17.5	-0.980145	-2.07416	0.11387	3.74023	0.70637	6.77409	12.6101	8.48901	16.7313
													17.5333	-1.67336	2.67208	0.171396	0.103407	-0.560709	2.32594	2.96679	3.24621	3.31054	3.65862	9.09866	5.24388	5.22574	9.32384	12.5975		17.5333	-0.954494	-2.0493	0.140315	3.77743	0.72541	6.82946	12.5975	8.48578	16.7093
													17.5667	-1.6315	2.6177	0.123912	0.151356	-0.546142	2.29515	2.97748	3.23484	3.33431	3.60254	9.07864	5.15251	5.19892	9.16018	12.5686		17.5667	-0.935638	-2.03078	0.159502	3.82055	0.750607	6.8905	12.5685	8.46898	16.6681
													17.6	-1.58545	2.54986	0.0626605	0.196498	-0.531885	2.25771	2.96585	3.22224	3.36242	3.54159	9.05053	5.08272	5.17487	8.97628	12.5489		17.6	-0.919124	-2.01472	0.176473	3.8827	0.799076	6.96632	12.5489	8.46284	16.6351
													17.6333	-1.54018	2.48015	0.0116677	0.230854	-0.522637	2.21151	2.96363	3.20307	3.39107	3.47406	9.03123	5.02304	5.14215	8.78993	12.5316		17.6333	-0.905869	-2.00218	0.190442	3.9489	0.85547	7.04233	12.5316	8.46206	16.6011
													17.6667	-1.49694	2.41437	-0.0282774	0.256134	-0.512293	2.15145	2.94601	3.17772	3.41736	3.40778	9.01066	4.97438	5.08823	8.586	12.5122		17.6667	-0.89489	-1.99116	0.201385	4.0277	0.924455	7.13094	12.5122	8.46018	16.5642
													17.7	-1.45101	2.34665	-0.0578962	0.274329	-0.501392	2.08755	2.93037	3.14589	3.44197	3.33699	8.97966	4.93467	5.02717	8.39131	12.507		17.7	-0.884016	-1.98064	0.212608	4.13785	1.02135	7.25436	12.507	8.47389	16.5402
													17.7333	-1.40014	2.28236	-0.0845551	0.284788	-0.484788	2.02318	2.91203	3.10281	3.46473	3.26145	8.95249	4.89325	4.96667	8.2048	12.5035		17.7333	-0.874479	-1.97106	0.222103	4.25752	1.12118	7.39385	12.5035	8.49092	16.5161
													17.7667	-1.35361	2.21091	-0.0983657	0.309992	-0.461869	1.95565	2.89969	3.05489	3.47994	3.19759	8.90927	4.84263	4.91228	8.03431	12.5135		17.7667	-0.864337	-1.96103	0.232354	4.38142	1.21784	7.54501	12.5135	8.52122	16.5057
													17.8	-1.30593	2.14347	-0.0968937	0.350795	-0.437283	1.88073	2.89431	3.00039	3.48147	3.13553	8.87061	4.77655	4.85346	7.87749	12.5377		17.8	-0.852955	-1.94957	0.243663	4.51571	1.31819	7.71324	12.5377	8.56329	16.5121
													17.8333	-1.26537	2.07915	-0.0736711	0.396262	-0.414973	1.79975	2.90826	2.9509	3.47045	3.07856	8.83351	4.70129	4.79985	7.75008	12.5645		17.8333	-0.836745	-1.93346	0.259968	4.66186	1.42468	7.89903	12.5645	8.60353	16.5255
													17.8667	-1.22501	2.02395	-0.0355437	0.441804	-0.39746	1.70404	2.94122	2.91376	3.45749	3.01047	8.79058	4.61253	4.75056	7.64347	12.5894		17.8667	-0.818994	-1.91517	0.277182	4.82218	1.53511	8.10926	12.5894	8.64311	16.5358
													17.9	-1.19104	1.97552	0.0135908	0.481581	-0.383133	1.60255	2.98215	2.87894	3.43415	2.95531	8.75432	4.51873	4.70073	7.52695	12.6272		17.9	-0.799204	-1.89379	0.295384	4.98164	1.63613	8.32715	12.6272	8.69468	16.5597
													17.9333	-1.16646	1.95287	0.0694606	0.517972	-0.370007	1.50616	3.02715	2.85	3.40638	2.90716	8.72235	4.41364	4.63117	7.44775	12.6524		17.9333	-0.780132	-1.87381	0.313546	5.11562	1.71138	8.51986	12.6524	8.73627	16.5686
													17.9667	-1.14551	1.93514	0.129387	0.556718	-0.355534	1.41307	3.06302	2.8255	3.36652	2.8665	8.69558	4.30184	4.55441	7.41525	12.6691		17.9667	-0.761187	-1.85465	0.332276	5.2412	1.77887	8.70352	12.6691	8.76951	16.5687
													18	-1.12873	1.92871	0.185707	0.587966	-0.348432	1.32305	3.09724	2.80082	3.31539	2.83374	8.68011	4.17969	4.47631	7.4242	12.6914		18	-0.746178	-1.8399	0.347544	5.35873	1.83699	8.88046	12.6914	8.80603	16.5767
													18.0333	-1.1133	1.93282	0.239753	0.627304	-0.343895	1.23808	3.13443	2.77589	3.25271	2.81419	8.67469	4.05029	4.40048	7.4755	12.6965		18.0333	-0.731734	-1.82579	0.362327	5.46177	1.88366	9.03989	12.6965	8.82791	16.565
													18.0667	-1.10183	1.93867	0.291789	0.672497	-0.352289	1.1659	3.17218	2.74904	3.18815	2.80876	8.66529	3.9218	4.32453	7.56621	12.6831		18.0667	-0.718287	-1.81303	0.376452	5.53735	1.90875	9.16595	12.6831	8.833	16.5333
													18.1	-1.09313	1.94622	0.322592	0.71917	-0.365403	1.09899	3.2033	2.72829	3.11387	2.81068	8.66709	3.79502	4.24734	7.6694	12.6752		18.1	-0.70449	-1.79988	0.390896	5.60451	1.93001	9.27901	12.6752	8.844	16.5063
													18.1333	-1.08288	1.96205	0.330067	0.771219	-0.380507	1.04196	3.21987	2.70553	3.03452	2.82125	8.65718	3.66549	4.18063	7.78323	12.6526		18.1333	-0.688641	-1.78558	0.408303	5.66187	1.94601	9.37773	12.6526	8.84353	16.4617
													18.1667	-1.07489	1.98461	0.311368	0.821502	-0.39394	0.99575	3.22998	2.66851	2.95966	2.83915	8.6439	3.54199	4.11052	7.89951	12.6139		18.1667	-0.669078	-1.76851	0.430359	5.71144	1.9586	9.46428	12.6139	8.82995	16.3979
													18.2	-1.06362	2.01075	0.281361	0.868614	-0.402147	0.963643	3.23385	2.62187	2.8863	2.87438	8.63605	3.42521	4.02811	8.0139	12.5648		18.2	-0.648447	-1.7517	0.454809	5.75754	1.9709	9.54417	12.5648	8.80454	16.325
													18.2333	-1.05197	2.03588	0.241593	0.914958	-0.410053	0.951852	3.21494	2.57901	2.81239	2.91228	8.61412	3.30133	3.9518	8.15601	12.4988		18.2333	-0.622141	-1.73139	0.487112	5.80478	1.98599	9.62358	12.4988	8.76475	16.2328
													18.2667	-1.03812	2.04679	0.195755	0.947532	-0.417358	0.962097	3.19518	2.523	2.73397	2.95342	8.58596	3.18439	3.89199	8.30001	12.4285		18.2667	-0.598326	-1.71337	0.516715	5.85299	2.00024	9.70575	12.4285	8.71827	16.1387
													18.3	-1.01984	2.0514	0.142816	0.964809	-0.424725	1.00239	3.18577	2.47786	2.65346	3.00811	8.5607	3.07717	3.83645	8.43362	12.3591		18.3	-0.581428	-1.70189	0.539036	5.89658	2.00637	9.78678	12.3591	8.6719	16.0464
													18.3333	-1.00003	2.0434	0.086422	0.97886	-0.424035	1.05736	3.184	2.44502	2.5813	3.07846	8.52853	2.98204	3.78613	8.55946	12.2761		18.3333	-0.56513	-1.69179	0.561527	5.93738	2.01081	9.86395	12.2761	8.61123	15.9409
													18.3667	-0.984055	2.03989	0.039787	0.977746	-0.424761	1.11778	3.17044	2.42399	2.51586	3.16065	8.48069	2.9017	3.73889	8.67372	12.1903		18.3667	-0.550824	-1.68332	0.581672	5.95624	2.00078	9.9117	12.1903	8.54446	15.8361
													18.4	-0.968648	2.0383	-0.000750985	0.968688	-0.420357	1.17798	3.15203	2.40816	2.45441	3.25917	8.42191	2.82993	3.7084	8.74981	12.1017		18.4	-0.540763	-1.67941	0.597888	5.96533	1.98606	9.94459	12.1017	8.47495	15.7284
													18.4333	-0.952304	2.0376	-0.0268581	0.933734	-0.424911	1.23852	3.13623	2.38805	2.40514	3.38118	8.35102	2.76631	3.69012	8.82098	12.0025		18.4333	-0.539796	-1.68294	0.603349	5.95815	1.96348	9.95281	12.0025	8.39078	15.6143
													18.4667	-0.941497	2.03629	-0.035003	0.873032	-0.434456	1.2994	3.13845	2.37485	2.35881	3.5105	8.27759	2.734	3.67853	8.8833	11.9036		18.4667	-0.546149	-1.69275	0.600453	5.93382	1.92919	9.93844	11.9036	8.3058	15.5014
													18.5	-0.927896	2.02872	-0.0287085	0.802811	-0.439402	1.35341	3.15168	2.37646	2.31654	3.64719	8.20814	2.72471	3.67078	8.94302	11.7951		18.5	-0.559324	-1.70809	0.589446	5.88288	1.87786	9.8879	11.7952	8.21115	15.3792
													18.5333	-0.915407	2.01799	-0.0166166	0.724426	-0.445949	1.40047	3.15314	2.38098	2.27298	3.79833	8.12646	2.73845	3.66251	8.99088	11.6843		18.5333	-0.574205	-1.72486	0.576454	5.8023	1.81138	9.79322	11.6843	8.11154	15.2571
													18.5667	-0.896372	2.00028	0.00483888	0.653548	-0.457328	1.4366	3.15282	2.39172	2.23281	3.95981	8.0407	2.7706	3.65535	9.03281	11.5794		18.5667	-0.594068	-1.7471	0.558969	5.69284	1.73188	9.65381	11.5794	8.0154	15.1433
													18.6	-0.871696	1.9895	0.034811	0.590834	-0.470458	1.45522	3.16398	2.4277	2.18737	4.12755	7.94387	2.81355	3.65288	9.05667	11.4758		18.6	-0.607445	-1.76445	0.549561	5.56177	1.64145	9.48209	11.4758	7.91986	15.0318
													18.6333	-0.847246	1.98138	0.0700933	0.53761	-0.488523	1.44683	3.16506	2.46035	2.14801	4.27216	7.83262	2.85424	3.65679	9.05156	11.377		18.6333	-0.617294	-1.77922	0.544633	5.41032	1.5443	9.27635	11.377	7.82871	14.9252
													18.6667	-0.825564	1.97628	0.115364	0.498359	-0.511353	1.43481	3.14997	2.49565	2.11047	4.40152	7.71813	2.88819	3.67891	9.02245	11.2866		18.6667	-0.627345	-1.7938	0.539107	5.2371	1.43604	9.03816	11.2866	7.74832	14.8248
													18.7	-0.808186	1.9621	0.151229	0.487609	-0.532669	1.41306	3.14527	2.53256	2.0704	4.52131	7.59946	2.91994	3.72386	8.98884	11.2028		18.7	-0.637612	-1.81034	0.535117	5.05416	1.31891	8.78942	11.2028	7.67559	14.73
													18.7333	-0.794598	1.94623	0.179241	0.506053	-0.549105	1.3879	3.1492	2.57754	2.02958	4.62909	7.48218	2.95087	3.79136	8.97604	11.126		18.7333	-0.642831	-1.82273	0.537065	4.87521	1.21055	8.53987	11.126	7.61166	14.6404
													18.7667	-0.781337	1.928	0.19909	0.562803	-0.557989	1.36185	3.13459	2.63698	1.99147	4.71188	7.37072	2.98545	3.86828	8.97714	11.0572		18.7667	-0.638723	-1.82769	0.550245	4.70796	1.10944	8.30647	11.0572	7.55719	14.5572
													18.8	-0.767341	1.9007	0.217959	0.649919	-0.554044	1.33053	3.10725	2.70423	1.97262	4.78284	7.25975	3.01286	3.95701	8.99986	10.9912		18.8	-0.633299	-1.83174	0.565142	4.54965	1.01271	8.08659	10.9912	7.5042	14.4783
													18.8333	-0.761728	1.8714	0.24254	0.760229	-0.547136	1.29145	3.06175	2.77811	1.95705	4.84161	7.14926	3.02321	4.0668	9.0283	10.9383		18.8333	-0.633179	-1.84	0.573638	4.4072	0.924417	7.88998	10.9383	7.46231	14.4142
													18.8667	-0.760478	1.84345	0.268063	0.887331	-0.536582	1.2441	3.01234	2.86081	1.94281	4.88098	7.04752	3.02243	4.21178	9.06232	10.8905		18.8667	-0.637418	-1.85186	0.577028	4.27989	0.839548	7.72024	10.8905	7.42687	14.3542
													18.9	-0.768059	1.82081	0.285792	1.00723	-0.512736	1.1884	2.97472	2.92897	1.93585	4.91274	6.95518	3.01704	4.38895	9.09985	10.8414		18.9	-0.641643	-1.86358	0.580294	4.18449	0.774426	7.59455	10.8414	7.38946	14.2933
													18.9333	-0.781337	1.79082	0.289076	1.13065	-0.47981	1.13293	2.902	2.98664	1.95023	4.94814	6.8694	3.01234	4.56533	9.14342	10.7906		18.9333	-0.647165	-1.87593	0.581604	4.11332	0.721857	7.50479	10.7906	7.35114	14.23
													18.9667	-0.796458	1.76352	0.284755	1.26805	-0.433808	1.08115	2.83142	3.03304	1.9812	4.99823	6.78402	3.00623	4.74964	9.17755	10.7343		18.9667	-0.654589	-1.88952	0.580341	4.06143	0.681691	7.44118	10.7343	7.30659	14.162
													19	-0.812275	1.74265	0.27505	1.39652	-0.377643	1.0224	2.7727	3.07371	2.03163	5.03916	6.70085	3.01272	4.94405	9.19213	10.6807		19	-0.664978	-1.90682	0.576864	4.02056	0.648878	7.39224	10.6807	7.26548	14.096
													19.0333	-0.822756	1.72202	0.255665	1.50523	-0.315581	0.963971	2.69876	3.11477	2.09236	5.0733	6.62935	3.01005	5.13026	9.18924	10.6238		19.0333	-0.681155	-1.92799	0.565679	3.98996	0.624167	7.35576	10.6238	7.22306	14.0246
													19.0667	-0.831453	1.70566	0.229983	1.58411	-0.254684	0.899579	2.62496	3.13251	2.16347	5.09149	6.56579	3.00519	5.29851	9.15704	10.5678		19.0667	-0.701024	-1.95271	0.550665	3.96945	0.605218	7.33368	10.5678	7.1813	13.9544
													19.1	-0.840514	1.70468	0.195509	1.63187	-0.193726	0.842099	2.56741	3.14071	2.24873	5.09556	6.50798	2.98729	5.46596	9.099	10.5116		19.1	-0.725028	-1.98069	0.530635	3.95027	0.592144	7.30841	10.5116	7.1411	13.882
													19.1333	-0.848321	1.71586	0.157188	1.65108	-0.136989	0.790159	2.50677	3.14075	2.33316	5.08931	6.45263	2.94844	5.62615	9.02253	10.4578		19.1333	-0.741189	-2.00097	0.518591	3.92927	0.581446	7.2771	10.4578	7.10339	13.8122
													19.1667	-0.846962	1.73647	0.115723	1.64029	-0.0869105	0.740322	2.46924	3.11773	2.42304	5.07039	6.39776	2.89358	5.76283	8.93627	10.4065		19.1667	-0.751044	-2.0156	0.513516	3.92338	0.587376	7.25938	10.4065	7.06675	13.7463
													19.2	-0.844603	1.75314	0.0714504	1.60979	-0.0397101	0.687887	2.43937	3.08083	2.51197	5.03077	6.34394	2.84489	5.87853	8.84	10.3568		19.2	-0.754437	-2.02255	0.513681	3.9277	0.607751	7.24765	10.3568	7.02921	13.6844
													19.2333	-0.84456	1.76633	0.0314106	1.55805	-0.00010087	0.636089	2.41297	3.03857	2.59483	4.9696	6.28572	2.80197	5.96223	8.74284	10.3084		19.2333	-0.746783	-2.01885	0.525285	3.92914	0.629899	7.22838	10.3084	6.99137	13.6253
													19.2667	-0.850008	1.78701	-0.000591975	1.48867	0.0278112	0.572295	2.42141	2.98582	2.66153	4.87983	6.2314	2.76018	6.02823	8.63441	10.2578		19.2667	-0.73644	-2.01084	0.537956	3.92467	0.653738	7.1956	10.2578	6.95123	13.5644
													19.3	-0.859972	1.80386	-0.0457665	1.39232	0.0455176	0.497382	2.42091	2.93629	2.71326	4.7563	6.18641	2.72712	6.0896	8.52471	10.2008		19.3	-0.716311	-1.9925	0.559878	3.93074	0.687421	7.17405	10.2008	6.90313	13.4984
													19.3333	-0.864705	1.82449	-0.103132	1.28586	0.0557977	0.418474	2.41481	2.88319	2.74114	4.61683	6.14247	2.6963	6.13913	8.41723	10.1429		19.3333	-0.685494	-1.96232	0.591333	3.94975	0.727141	7.17235	10.1429	6.85063	13.4352
													19.3667	-0.87418	1.84162	-0.170629	1.18104	0.0566263	0.344117	2.41014	2.82612	2.76059	4.45785	6.09469	2.66696	6.15371	8.29992	10.0731		19.3667	-0.641543	-1.9188	0.635712	3.98146	0.778951	7.18397	10.0731	6.78527	13.3609
													19.4	-0.88481	1.85373	-0.232049	1.08693	0.0502005	0.278106	2.40454	2.77745	2.77122	4.29285	6.04496	2.64912	6.13965	8.17812	10.0019		19.4	-0.586246	-1.86321	0.690719	4.01289	0.828013	7.19776	10.0019	6.71154	13.2922
													19.4333	-0.898337	1.8647	-0.273224	1.00715	0.036041	0.206239	2.39197	2.7246	2.76381	4.12098	5.99536	2.64199	6.10253	8.04283	9.92698		19.4333	-0.524069	-1.80019	0.752054	4.05107	0.879555	7.22258	9.92698	6.63118	13.2228
													19.4667	-0.912537	1.8718	-0.321837	0.949677	0.0124264	0.129327	2.37797	2.65778	2.73794	3.9561	5.94716	2.63557	6.04921	7.90387	9.84296		19.4667	-0.463717	-1.73853	0.811093	4.09569	0.931735	7.25964	9.84297	6.54052	13.1454
													19.5	-0.934326	1.88451	-0.382329	0.902499	-0.0144547	0.0560685	2.34876	2.57924	2.69672	3.80465	5.89783	2.62869	5.98129	7.74825	9.75991		19.5	-0.401916	-1.67616	0.872328	4.13073	0.97258	7.28889	9.75991	6.45014	13.0697
													19.5333	-0.951728	1.89975	-0.449653	0.862299	-0.0370678	-0.0125357	2.31836	2.51278	2.65184	3.66729	5.8502	2.61036	5.89757	7.57782	9.67769		19.5333	-0.342562	-1.61625	0.93113	4.16241	1.00481	7.32001	9.67769	6.36119	12.9942
													19.5667	-0.96043	1.9204	-0.518951	0.838344	-0.0590404	-0.0820299	2.28906	2.44737	2.60297	3.54098	5.78869	2.56659	5.80529	7.40104	9.59476		19.5667	-0.29183	-1.56452	0.980856	4.18603	1.0275	7.34457	9.59476	6.27237	12.9171
													19.6	-0.962916	1.94031	-0.575623	0.824931	-0.0795604	-0.136626	2.2478	2.3873	2.54855	3.42953	5.73269	2.50963	5.71324	7.23424	9.52133		19.6	-0.246962	-1.5205	1.02658	4.22295	1.05921	7.38668	9.52133	6.19152	12.8511
													19.6333	-0.953938	1.95781	-0.611244	0.830733	-0.0991999	-0.181952	2.20324	2.33404	2.48606	3.35488	5.67644	2.45372	5.60126	7.0796	9.46051		19.6333	-0.210483	-1.48625	1.06529	4.25412	1.08231	7.42593	9.46051	6.12434	12.7967
													19.6667	-0.940642	1.96357	-0.649525	0.850366	-0.110078	-0.210102	2.16104	2.2725	2.42674	3.2965	5.61692	2.38986	5.46007	6.93763	9.39616		19.6667	-0.180424	-1.46049	1.09964	4.27738	1.10218	7.45259	9.39616	6.0562	12.7361
													19.7	-0.919303	1.9748	-0.672033	0.878992	-0.114591	-0.233228	2.11711	2.20712	2.36468	3.25559	5.56878	2.3185	5.33513	6.81045	9.3434		19.7	-0.160058	-1.44637	1.12626	4.2885	1.10962	7.46738	9.3434	5.99701	12.6898
													19.7333	-0.889171	1.99565	-0.694947	0.927384	-0.115833	-0.258222	2.06806	2.14424	2.29543	3.21532	5.51206	2.2391	5.22217	6.70399	9.28826		19.7333	-0.151897	-1.44488	1.14109	4.29575	1.11706	7.47445	9.28826	5.94046	12.6361
													19.7667	-0.849242	2.01927	-0.735833	0.998832	-0.112023	-0.283608	2.02292	2.07948	2.22373	3.19001	5.44937	2.14712	5.13161	6.61253	9.22917		19.7667	-0.150332	-1.45236	1.15169	4.30027	1.12334	7.47721	9.22918	5.88435	12.574
													19.8	-0.800483	2.03624	-0.760603	1.08599	-0.104554	-0.300316	1.97687	2.0234	2.1554	3.16696	5.3913	2.03971	5.06808	6.5228	9.17155		19.8	-0.154292	-1.46539	1.15681	4.31362	1.13927	7.48796	9.17155	5.8311	12.512
													19.8333	-0.741431	2.04512	-0.775452	1.19305	-0.0958957	-0.312859	1.93275	1.98073	2.09345	3.13875	5.33164	1.92521	5.04342	6.45058	9.10754		19.8333	-0.16859	-1.48689	1.14971	4.34165	1.16724	7.51607	9.10754	5.77521	12.4399
													19.8667	-0.682178	2.05646	-0.79398	1.31506	-0.0968645	-0.319924	1.8951	1.93288	2.03851	3.11722	5.27403	1.79518	5.06602	6.41099	9.03352		19.8667	-0.18975	-1.51627	1.13677	4.36993	1.19935	7.54052	9.03352	5.71245	12.3546
													19.9	-0.623603	2.06242	-0.803224	1.43054	-0.100259	-0.324969	1.86323	1.89434	1.99738	3.11442	5.22829	1.65887	5.13428	6.37827	8.95604		19.9	-0.21546	-1.54964	1.11872	4.41047	1.24865	7.5723	8.95604	5.64652	12.2656
													19.9333	-0.566739	2.07101	-0.821744	1.54451	-0.0986431	-0.328618	1.83754	1.86424	1.97635	3.12248	5.17236	1.51425	5.2344	6.33861	8.87151		19.9333	-0.235851	-1.57605	1.10435	4.44472	1.29798	7.59145	8.87151	5.57731	12.1657
													19.9667	-0.512587	2.08422	-0.83534	1.64559	-0.0949022	-0.328526	1.8153	1.83012	1.97265	3.1173	5.1168	1.35744	5.34941	6.30393	8.77336		19.9667	-0.252898	-1.5991	1.0933	4.47399	1.35238	7.5956	8.77336	5.49693	12.0498
		Fig.6j															Fig.6k									Fig.6l																					Fig.6m
		rawTraces		time	amp		time	amp			time	amp		time	amp		PTS+ATAD3Afl/fl	Trial#	timestamp		PTS+ATAD3A Ast Het	Trial#	timestamp			PTS+ATAD3Afl/fl											PTS+ATAD3A Ast Het										Evoked Response (Z-score)	PTS+ATAD3Afl/fl
		PTS+ATAD3Afl/fl		-1	0.00506678		-1	0.0128618		PTS+ATAD3A Ast Het	-1	0.0159798		-1	-0.00292314			20	1.99164			20	1.99164			1mW	FR	percentage	5mW	FR	percentage	20mW	FR	percentage			1mW	FR	percentage	5mW	FR	percentage	20mW	FR	percentage			C_1mW	C_5mW
				-0.999975	0.00292314		-0.999975	0.00896429			-0.999975	0.0105233		-0.999975	-0.00818479			20	1.85349			20	1.85349				-8.89027	0		-9.08075	0		0.405797	0				0.36853	0		-36.7164	0		-35.0476	0			-0.278582	1.28571
				-0.99995	0.00604116		-0.99995	0.00194876			-0.99995	0.00311802		-0.99995	-0.0101336			20	1.80229			20	1.80229				-8.89027	0.00990099		-9.08075	0.00990099		0.405797	0.00990099				0.36853	0.00303951		-36.7164	0.00303951		-35.0476	0.00303951			0.66359	1.18942
				-0.999925	0.0040924		-0.999925	-0.00389752			-0.999925	0.0048719		-0.999925	-0.00779504			20	1.79327			20	1.79327				-8.43064	0.00990099		-8.58799	0.00990099		0.443064	0.00990099				0.480331	0.00303951		-36.6377	0.00303951		-32.9027	0.00303951			0.756688	1.73316
				-0.9999	0.00116926		-0.9999	-0.00506678			-0.9999	0.00896429		-0.9999	-0.00389752			20	1.64229			20	1.64229				-8.43064	0.019802		-8.58799	0.019802		0.443064	0.019802				0.480331	0.00607903		-36.6377	0.00607903		-32.9027	0.00607903			0.143712	1.38763
				-0.999875	-0.00350777		-0.999875	-0.00370264			-0.999875	0.0148106		-0.999875	-0.00779504			20	1.47014			20	1.47014				-5.46584	0.019802		-8.16563	0.019802		1.01863	0.019802				0.488613	0.00607903		-35.1056	0.00607903		-30.4265	0.00607903			-0.0808769	1.1068
				-0.99985	-0.00097438		-0.99985	-0.00233851			-0.99985	0.018903		-0.99985	-0.00798992			20	1.26729			20	1.26729				-5.46584	0.029703		-8.16563	0.029703		1.01863	0.029703				0.488613	0.00911854		-35.1056	0.00911854		-30.4265	0.00911854			0.75384	2.41626
				-0.999825	-0.000584628		-0.999825	0.00136413			-0.999825	0.0194876		-0.999825	-0.00526165			20	1.17439			20	1.17439				-5.0766	0.029703		-6.25673	0.029703		1.06926	0.029703				0.761905	0.00911854		-26.9027	0.00911854		-28.4348	0.00911854			0.82885	2.18531
				-0.9998	-0.00506678		-0.9998	0.00448215			-0.9998	0.0210466		-0.9998	-0.00136413			20	1.14914			20	1.14914				-5.0766	0.039604		-6.25673	0.039604		1.06926	0.039604				0.761905	0.0121581		-26.9027	0.0121581		-28.4348	0.0121581			-0.0440703	2.77959
				-0.999775	-0.00760016		-0.999775	0.00292314			-0.999775	0.0233851		-0.999775	-0.00097438			20	1.13094			20	1.13094				-5.01863	0.039604		-6.02484	0.039604		1.54113	0.039604				0.865424	0.0121581		-25.176	0.0121581		-28.381	0.0121581			0.915894	1.92139
				-0.99975	-0.00915917		-0.99975	-0.00448215			-0.99975	0.0259185		-0.99975	-0.00448215			20	1.11204			20	1.11204				-5.01863	0.049505		-6.02484	0.049505		1.54113	0.049505				0.865424	0.0151976		-25.176	0.0151976		-28.381	0.0151976			0.821874	0.181396
				-0.999725	-0.00798992		-0.999725	-0.00837967			-0.999725	0.0208517		-0.999725	-0.0113028			20	1.10864			20	1.10864				-4.89855	0.049505		-5.81366	0.049505		2.09938	0.049505				1.04348	0.0151976		-22.6501	0.0151976		-26.0538	0.0151976			0.612146	0.369484
				-0.9997	-0.00623603		-0.9997	-0.00350777			-0.9997	0.0150055		-0.9997	-0.0165645			20	1.02272			20	1.02272				-4.89855	0.0594059		-5.81366	0.0594059		2.09938	0.0594059				1.04348	0.0182371		-22.6501	0.0182371		-26.0538	0.0182371			0.392704	0.283981
				-0.999675	-0.000584628		-0.999675	0.00155901			-0.999675	0.0118874		-0.999675	-0.015785			20	1.00414			20	1.00414				-4.56315	0.0594059		-5.58178	0.0594059		2.11594	0.0594059				1.13458	0.0182371		-22.1905	0.0182371		-24.8282	0.0182371			0.421773	-0.612009
				-0.99965	0.00175388		-0.99965	-0.00253339			-0.99965	0.00740529		-0.99965	-0.0113028			20	0.882665			20	0.882665				-4.56315	0.0693069		-5.58178	0.0693069		2.11594	0.0693069				1.13458	0.0212766		-22.1905	0.0212766		-24.8282	0.0212766			-0.797023	-0.866637
				-0.999625	0.00448215		-0.999625	-0.00954892			-0.999625	0.00311802		-0.999625	-0.0101336			20	0.879415			20	0.879415				-4.38509	0.0693069		-5.54865	0.0693069		2.17316	0.0693069				1.13872	0.0212766		-16.53	0.0212766		-24.4017	0.0212766			-0.228955	0.148446
				-0.9996	0.00214364		-0.9996	-0.0101336			-0.9996	0.00292314		-0.9996	-0.00915917			20	0.86014			20	0.86014				-4.38509	0.0792079		-5.54865	0.0792079		2.17316	0.0792079				1.13872	0.0243161		-16.53	0.0243161		-24.4017	0.0243161			-0.285716	-0.409359
				-0.999575	0.000389752		-0.999575	-0.00779504			-0.999575	0.00233851		-0.999575	-0.0105233			20	0.84274			20	0.84274				-4.1039	0.0792079		-5.54451	0.0792079		2.2029	0.0792079				1.25052	0.0243161		-16.3561	0.0243161		-22.9441	0.0243161			-0.388281	-0.540547
				-0.99955	0.00292314		-0.99955	-0.00253339			-0.99955	0.00272826		-0.99955	-0.00682066			20	0.824815			20	0.824815				-4.1039	0.0891089		-5.54451	0.0891089		2.2029	0.0891089				1.25052	0.0273556		-16.3561	0.0273556		-22.9441	0.0273556			-0.316176	-0.555859
				-0.999525	0.00389752		-0.999525	0.000584628			-0.999525	0.00233851		-0.999525	-0.00760016			20	0.81564			20	0.81564				-4.10352	0.0891089		-5.00207	0.0891089		2.21212	0.0891089				1.36232	0.0273556		-15.9876	0.0273556		-22.8737	0.0273556			-0.972345	-0.578103
				-0.9995	0.00370264		-0.9995	0.00253339			-0.9995	0.00506678		-0.9995	-0.000194876			20	0.776615			20	0.776615				-4.10352	0.0990099		-5.00207	0.0990099		2.21212	0.0990099				1.36232	0.0303951		-15.9876	0.0303951		-22.8737	0.0303951			-0.62092	-0.437975
				-0.999475	0.00311802		-0.999475	0.00272826			-0.999475	0.00233851		-0.999475	0.0048719			20	0.74314			20	0.74314				-3.99172	0.0990099		-4.89855	0.0990099		2.25259	0.0990099				1.45756	0.0303951		-14.9607	0.0303951		-22.3934	0.0303951			-0.103957	-0.210146
				-0.99945	-0.000194876		-0.99945	0.00818479			-0.99945	0.00175388		-0.99945	0.00818479			20	0.73834			20	0.73834				-3.99172	0.108911		-4.89855	0.108911		2.25259	0.108911				1.45756	0.0334347		-14.9607	0.0334347		-22.3934	0.0334347			-0.969185	-0.218679
				-0.999425	-0.00428727		-0.999425	0.0132516			-0.999425	-0.000194876		-0.999425	0.00350777			20	0.71624			20	0.71624				-3.79296	0.108911		-3.91775	0.108911		2.26501	0.108911				1.60248	0.0334347		-13.3499	0.0334347		-21.499	0.0334347			-0.441521	-0.892362
				-0.9994	-0.00214364		-0.9994	0.0153952			-0.9994	-0.00506678		-0.9994	0.00233851			20	0.67184			20	0.67184				-3.79296	0.118812		-3.91775	0.118812		2.26501	0.118812				1.60248	0.0364742		-13.3499	0.0364742		-21.499	0.0364742			-0.370652	-0.692754
				-0.999375	0.000779504		-0.999375	0.0150055			-0.999375	-0.00935405		-0.999375	0.0105233			20	0.60684			20	0.60684				-3.69772	0.118812		-3.90476	0.118812		2.32468	0.118812				1.67288	0.0364742		-11.5362	0.0364742		-21.3789	0.0364742			-0.0256708	-0.659117
				-0.99935	0.00292314		-0.99935	0.0120823			-0.99935	-0.00798992		-0.99935	0.015785			20	0.60519			20	0.60519				-3.69772	0.128713		-3.90476	0.128713		2.32468	0.128713				1.67288	0.0395137		-11.5362	0.0395137		-21.3789	0.0395137			-0.786098	-1.15471
				-0.999325	0.00097438		-0.999325	0.00526165			-0.999325	0		-0.999325	0.0142259			20	0.563965			20	0.563965				-3.54865	0.128713		-3.87578	0.128713		2.35065	0.128713				1.81366	0.0395137		-8.41822	0.0395137		-20.8571	0.0395137			-0.00232665	-0.452951
				-0.9993	-0.00136413		-0.9993	0.00682066			-0.9993	0.0056514		-0.9993	0.00935405			20	0.54284			20	0.54284				-3.54865	0.138614		-3.87578	0.138614		2.35065	0.138614				1.81366	0.0425532		-8.41822	0.0425532		-20.8571	0.0425532			-0.588138	-0.142345
				-0.999275	-0.00233851		-0.999275	0.00623603			-0.999275	0.00097438		-0.999275	0.00721041			20	0.51829			20	0.51829				-3.45756	0.138614		-3.86749	0.138614		2.40166	0.138614				2.38095	0.0425532		-8.26501	0.0425532		-19.5404	0.0425532			-0.999942	-1.32837
				-0.99925	-0.00194876		-0.99925	0.00428727			-0.99925	-0.0113028		-0.99925	0.00604116			20	0.50549			20	0.50549				-3.45756	0.148515		-3.86749	0.148515		2.40166	0.148515				2.38095	0.0455927		-8.26501	0.0455927		-19.5404	0.0455927			-1.02838	-0.843946
				-0.999225	-0.000779504		-0.999225	-0.00155901			-0.999225	-0.0153952		-0.999225	0.00545653			20	0.490315			20	0.490315				-3.35818	0.148515		-3.84265	0.148515		2.4265	0.148515				2.50518	0.0455927		-6.12836	0.0455927		-19.4493	0.0455927			0.0117911	-0.298665
				-0.9992	0.00311802		-0.9992	-0.00311802			-0.9992	-0.018903		-0.9992	0.0056514			20	0.42844			20	0.42844				-3.35818	0.158416		-3.84265	0.158416		2.4265	0.158416				2.50518	0.0486322		-6.12836	0.0486322		-19.4493	0.0486322			-0.344715	-0.492922
				-0.999175	0.00662578		-0.999175	-0.00662578			-0.999175	-0.0161747		-0.999175	-0.00136413			20	0.42514			20	0.42514				-3.08903	0.158416		-3.80124	0.158416		2.56729	0.158416				2.67081	0.0486322		-5.80538	0.0486322		-17.5321	0.0486322			-0.401914	-0.36632
				-0.99915	0.0048719		-0.99915	-0.0097438			-0.99915	-0.00837967		-0.99915	-0.00779504			20	0.30484			20	0.30484				-3.08903	0.168317		-3.80124	0.168317		2.56729	0.168317				2.67081	0.0516717		-5.80538	0.0516717		-17.5321	0.0516717			-0.555346	-0.124038
				-0.999125	0		-0.999125	-0.00857454			-0.999125	-0.00604116		-0.999125	-0.00604116			20	0.29724			20	0.29724				-3.04348	0.168317		-3.44589	0.168317		2.7316	0.168317				2.7412	0.0516717		-5.64803	0.0516717		-17.118	0.0516717			-0.374258	-0.0442627
				-0.9991	-0.00116926		-0.9991	-0.000779504			-0.9991	-0.00954892		-0.9991	-0.000194876			20	0.21319			20	0.21319				-3.04348	0.178218		-3.44589	0.178218		2.7316	0.178218				2.7412	0.0547112		-5.64803	0.0547112		-17.118	0.0547112			-0.0547881	-0.474423
				-0.999075	-0.00214364		-0.999075	0.00350777			-0.999075	-0.0130567		-0.999075	0.00350777			20	0.154265			20	0.154265				-2.87371	0.178218		-3.28139	0.178218		2.75362	0.178218				3.08489	0.0547112		-5.2588	0.0547112		-16.0538	0.0547112			0.390844	-0.516568
				-0.99905	-0.00214364		-0.99905	-0.000389752			-0.99905	-0.0124721		-0.99905	0.00604116			20	0.12694			20	0.12694				-2.87371	0.188119		-3.28139	0.188119		2.75362	0.188119				3.08489	0.0577508		-5.2588	0.0577508		-16.0538	0.0577508			0.828607	-0.243124
				-0.999025	-0.00662578		-0.999025	-0.00623603			-0.999025	-0.00798992		-0.999025	0.00233851			20	0.11744			20	0.11744				-2.84058	0.188119		-2.88312	0.188119		2.75776	0.188119				3.15114	0.0577508		-5.13872	0.0577508		-14.6791	0.0577508			-0.233773	-0.225274
				-0.999	-0.0105233		-0.999	-0.00467702			-0.999	-0.00682066		-0.999	-0.00136413			20	0.11244			20	0.11244				-2.84058	0.19802		-2.88312	0.19802		2.75776	0.19802				3.15114	0.0607903		-5.13872	0.0607903		-14.6791	0.0607903			-0.572755	-0.598681
				-0.998975	-0.0136413		-0.998975	0.000389752			-0.998975	-0.00954892		-0.998975	-0.00837967			20	0.10509			20	0.10509				-2.62112	0.19802		-2.61905	0.19802		2.81988	0.19802				3.30849	0.0607903		-5.09317	0.0607903		-12.4348	0.0607903			-0.888897	-1.26672
				-0.99895	-0.00876942		-0.99895	0.000584628			-0.99895	-0.00740529		-0.99895	-0.0116926			20	0.06674			20	0.06674				-2.62112	0.207921		-2.61905	0.207921		2.81988	0.207921				3.30849	0.0638298		-5.09317	0.0638298		-12.4348	0.0638298			-0.260281	0.161558
				-0.998925	-0.0048719		-0.998925	0.00136413			-0.998925	-0.00350777		-0.998925	-0.00701554			20	0.06584			20	0.06584				-2.44589	0.207921		-2.48033	0.207921		2.98137	0.207921				3.45342	0.0638298		-3.84265	0.0638298		-12.4058	0.0638298			-0.72778	0.924715
				-0.9989	-0.00155901		-0.9989	-0.00311802			-0.9989	-0.0056514		-0.9989	-0.00311802			20	0.02874			20	0.02874				-2.44589	0.217822		-2.48033	0.217822		2.98137	0.217822				3.45342	0.0668693		-3.84265	0.0668693		-12.4058	0.0668693			-0.786746	0.554184
				-0.998875	0.00370264		-0.998875	-0.00662578			-0.998875	-0.0118874		-0.998875	-0.00292314			20	0.02034			20	0.02034				-2.32712	0.217822		-2.39337	0.217822		3	0.217822				3.47826	0.0668693		-3.21739	0.0668693		-12.1656	0.0668693			-0.619311	1.118
				-0.99885	0.00857454		-0.99885	-0.00721041			-0.99885	-0.0167593		-0.99885	-0.0040924			20	0.01894			20	0.01894				-2.32712	0.227723		-2.39337	0.227723		3	0.227723				3.47826	0.0699088		-3.21739	0.0699088		-12.1656	0.0699088			-0.368938	1.49783
				-0.998825	0.0109131		-0.998825	-0.0040924			-0.998825	-0.00993867		-0.998825	-0.00545653			20	0.016915			20	0.016915				-2.04555	0.227723		-2.32712	0.227723		3.04762	0.227723				3.59006	0.0699088		-3.07246	0.0699088		-11.619	0.0699088			-0.733964	0.632855
				-0.9988	0.00545653		-0.9988	0.00233851			-0.9988	0.00214364		-0.9988	-0.00896429			20	-0.21671			20	-0.21671				-2.04555	0.237624		-2.32712	0.237624		3.04762	0.237624				3.59006	0.0729483		-3.07246	0.0729483		-11.619	0.0729483			0.0208783	0.838246
				-0.998775	-0.00116926		-0.998775	0.00740529			-0.998775	0.00389752		-0.998775	-0.00350777			20	-0.26371			20	-0.26371				-1.99567	0.237624		-2.30642	0.237624		3.11255	0.237624				3.65217	0.0729483		-3.06832	0.0729483		-11.4824	0.0729483			-0.0761215	1.48849
				-0.99875	-0.00350777		-0.99875	0.00331289			-0.99875	0.00253339		-0.99875	0.00175388			20	-0.37986			20	-0.37986				-1.99567	0.247525		-2.30642	0.247525		3.11255	0.247525				3.65217	0.0759878		-3.06832	0.0759878		-11.4824	0.0759878			-0.0760612	0.646065
				-0.998725	-0.00194876		-0.998725	-0.000584628			-0.998725	0.000584628		-0.998725	0.00331289			20	-0.615335			20	-0.615335				-1.85921	0.247525		-2.22078	0.247525		3.26407	0.247525				3.69772	0.0759878		-2.12836	0.0759878		-10.9482	0.0759878			-0.00881352	1.66583
				-0.9987	-0.00116926		-0.9987	-0.00136413			-0.9987	0.00370264		-0.9987	0.000779504			20	-0.697335			20	-0.697335				-1.85921	0.257426		-2.22078	0.257426		3.26407	0.257426				3.69772	0.0790274		-2.12836	0.0790274		-10.9482	0.0790274			-0.428908	-0.310651
				-0.998675	0.00253339		-0.998675	0.000389752			-0.998675	0.00935405		-0.998675	-0.00097438			20	-0.81406			20	-0.81406				-1.84416	0.257426		-2.09524	0.257426		3.31602	0.257426				3.83437	0.0790274		-1.92133	0.0790274		-10.6004	0.0790274			0.229773	0.388325
				-0.99865	0.000779504		-0.99865	-0.000194876			-0.99865	0.0103284		-0.99865	-0.0056514			20	-0.82561			20	-0.82561				-1.84416	0.267327		-2.09524	0.267327		3.31602	0.267327				3.83437	0.0820669		-1.92133	0.0820669		-10.6004	0.0820669			0.056186	-0.349053
				-0.998625	0.000194876		-0.998625	0.00116926			-0.998625	0.00136413		-0.998625	-0.0113028			20	-0.845585			20	-0.845585				-1.78788	0.267327		-2.00866	0.267327		3.8355	0.267327				3.91304	0.0820669		-1.76398	0.0820669		-10.3602	0.0820669			0.00320738	-1.15433
				-0.9986	-0.000779504		-0.9986	0.00350777			-0.9986	-0.00876942		-0.9986	-0.0103284			19	1.98959			19	1.98959				-1.78788	0.277228		-2.00866	0.277228		3.8355	0.277228				3.91304	0.0851064		-1.76398	0.0851064		-10.3602	0.0851064			0.582483	-0.828751
				-0.998575	-0.000584628		-0.998575	0.0056514			-0.998575	-0.00740529		-0.998575	-0.00545653			19	1.95044			19	1.95044				-1.72294	0.277228		-1.87578	0.277228		4.24675	0.277228				3.94203	0.0851064		-1.706	0.0851064		-10.2774	0.0851064			-0.316046	0.866811
				-0.99855	0.000779504		-0.99855	0.00467702			-0.99855	-0.0040924		-0.99855	-0.000779504			19	1.88634			19	1.88634				-1.72294	0.287129		-1.87578	0.287129		4.24675	0.287129				3.94203	0.0881459		-1.706	0.0881459		-10.2774	0.0881459			-0.532598	1.016
				-0.998525	0.00370264		-0.998525	-0.000584628			-0.998525	-0.00097438		-0.998525	0.000194876			19	1.72259			19	1.72259				-1.63975	0.287129		-1.79221	0.287129		4.25541	0.287129				3.97516	0.0881459		-1.58592	0.0881459		-10.1077	0.0881459			-0.246819	-0.978707
				-0.9985	0.00818479		-0.9985	-0.00175388			-0.9985	0.00214364		-0.9985	0.00116926			19	1.52249			19	1.52249				-1.63975	0.29703		-1.79221	0.29703		4.25541	0.29703				3.97516	0.0911854		-1.58592	0.0911854		-10.1077	0.0911854			-0.326981	-0.515681
				-0.998475	0.0101336		-0.998475	-0.00194876			-0.998475	0.0048719		-0.998475	0			19	1.43934			19	1.43934				-1.5368	0.29703		-1.71843	0.29703		4.50104	0.29703				3.98344	0.0911854		-1.56936	0.0911854		-9.93789	0.0911854			-0.882313	0.9562
				-0.99845	0.00876942		-0.99845	-0.00155901			-0.99845	0.00584628		-0.99845	-0.00233851			19	1.42469			19	1.42469				-1.5368	0.306931		-1.71843	0.306931		4.50104	0.306931				3.98344	0.0942249		-1.56936	0.0942249		-9.93789	0.0942249			-0.243639	0.414753
				-0.998425	0.0056514		-0.998425	-0.00467702			-0.998425	0.00194876		-0.998425	-0.000194876			19	1.22889			19	1.22889				-1.38095	0.306931		-1.5942	0.306931		4.52588	0.306931				3.99586	0.0942249		-1.46584	0.0942249		-9.33747	0.0942249			-0.359884	0.28102
				-0.9984	0.00389752		-0.9984	-0.00545653			-0.9984	-0.00370264		-0.9984	0.00253339			19	1.22749			19	1.22749				-1.38095	0.316832		-1.5942	0.316832		4.52588	0.326733				3.99586	0.0972644		-1.46584	0.0972644		-9.33747	0.0972644			0.0525141	-0.0834007
				-0.998375	0.000389752		-0.998375	-0.00370264			-0.998375	-0.00467702		-0.998375	0.00526165			19	1.18782			19	1.18782				-1.37888	0.316832		-1.59307	0.316832		4.54545	0.326733				4.11594	0.0972644		-1.39545	0.0972644		-9.06832	0.0972644			0.112042	-0.245007
				-0.99835	-0.000389752		-0.99835	-0.00097438			-0.99835	-0.00370264		-0.99835	0.0109131			19	0.914315			19	0.914315				-1.37888	0.326733		-1.59307	0.326733		4.54545	0.336634				4.11594	0.100304		-1.39545	0.100304		-9.06832	0.100304			-0.244963	0.727337
				-0.998325	-0.00292314		-0.998325	0.000584628			-0.998325	-0.00136413		-0.998325	0.00876942			19	0.91144			19	0.91144				-1.35931	0.326733		-1.44513	0.326733		4.66234	0.336634				4.16977	0.100304		-1.38302	0.100304		-8.35611	0.100304			-0.00645363	0.596908
				-0.9983	-0.0040924		-0.9983	-0.00233851			-0.9983	-0.00194876		-0.9983	0.00526165			19	0.90184			19	0.90184				-1.35931	0.336634		-1.44513	0.336634		4.66234	0.346535				4.16977	0.103343		-1.38302	0.103343		-8.35611	0.103343			0.552343	0.497066
				-0.998275	-0.00721041		-0.998275	-0.00448215			-0.998275	-0.00272826		-0.998275	0.00448215			19	0.81554			19	0.81554				-1.25052	0.336634		-1.43685	0.336634		4.72294	0.346535				4.21118	0.103343		-1.2795	0.103343		-8.2236	0.103343			-0.147203	0.898014
				-0.99825	-0.00662578		-0.99825	-0.00896429			-0.99825	0.00292314		-0.99825	0.00467702			19	0.812715			19	0.812715				-1.25052	0.346535		-1.43685	0.346535		4.72294	0.356436				4.21118	0.106383		-1.2795	0.106383		-8.2236	0.106383			0.0846581	0.345425
				-0.998225	-0.0040924		-0.998225	-0.0109131			-0.998225	0.00662578		-0.998225	0.00798992			19	0.79209			19	0.79209				-1.02277	0.346535		-1.35818	0.346535		4.74892	0.356436				4.22774	0.106383		-1.20911	0.106383		-7.84265	0.106383			0.900968	0.694877
				-0.9982	-0.00175388		-0.9982	-0.00584628			-0.9982	0.0097438		-0.9982	0.00935405			19	0.77174			19	0.77174				-1.02277	0.356436		-1.35818	0.356436		4.74892	0.366337				4.22774	0.109422		-1.20911	0.109422		-7.84265	0.109422			0.00934386	0.269277
				-0.998175	0.000584628		-0.998175	0.00194876			-0.998175	0.00467702		-0.998175	0.0097438			19	0.72479			19	0.72479				-0.883117	0.356436		-1.34576	0.356436		4.88613	0.366337				4.30642	0.109422		-1.18012	0.109422		-7.76398	0.109422			0.75681	0.660856
				-0.99815	0.000194876		-0.99815	0.00428727			-0.99815	0.000584628		-0.99815	0.0120823			19	0.71609			19	0.71609				-0.883117	0.366337		-1.34576	0.366337		4.88613	0.376238				4.30642	0.112462		-1.18012	0.112462		-7.76398	0.112462			-0.119169	0.869048
				-0.998125	0.00311802		-0.998125	0.00467702			-0.998125	0.000584628		-0.998125	0.0109131			19	0.71054			19	0.71054				-0.87013	0.366337		-1.13458	0.366337		5.38961	0.376238				4.31056	0.112462		-0.807453	0.112462		-7.75155	0.112462			-0.315497	0.26264
				-0.9981	0.0103284		-0.9981	0.00155901			-0.9981	0.00272826		-0.9981	0.00701554			19	0.67714			19	0.67714				-0.87013	0.376238		-1.13458	0.376238		5.38961	0.386139				4.31056	0.115502		-0.807453	0.115502		-7.75155	0.115502			0.163915	-0.29547
				-0.998075	0.0120823		-0.998075	0.00194876			-0.998075	-0.00155901		-0.998075	0.000584628			19	0.667365			19	0.667365				-0.79089	0.376238		-1.04762	0.376238		5.41615	0.386139				4.50104	0.115502		-0.774327	0.115502		-7.03934	0.115502			0.139421	-0.131669
				-0.99805	0.00350777		-0.99805	0.00194876			-0.99805	-0.00526165		-0.99805	-0.00623603			19	0.65089			19	0.65089				-0.79089	0.386139		-1.04762	0.386139		5.41615	0.39604				4.50104	0.118541		-0.774327	0.118541		-7.03934	0.118541			0.20515	-0.0831333
				-0.998025	-0.00311802		-0.998025	0.00467702			-0.998025	-0.0148106		-0.998025	-0.0113028			19	0.605315			19	0.605315				-0.786749	0.386139		-1.01732	0.386139		5.50725	0.39604				4.52174	0.118541		-0.745342	0.118541		-6.35197	0.118541			0.626194	0.0898037
				-0.998	0.00311802		-0.998	0.00604116			-0.998	-0.0208517		-0.998	-0.00915917			19	0.56054			19	0.56054				-0.786749	0.39604		-1.01732	0.39604		5.50725	0.405941				4.52174	0.121581		-0.745342	0.121581		-6.35197	0.121581			0.163761	-0.637629
				-0.997975	0.00526165		-0.997975	0.00721041			-0.997975	-0.015785		-0.997975	0			19	0.55524			19	0.55524				-0.748918	0.39604		-0.969697	0.39604		5.78355	0.405941				4.54244	0.121581		-0.732919	0.121581		-6.31884	0.121581			0.0808791	-0.846602
				-0.99795	0.00467702		-0.99795	0.00448215			-0.99795	-0.0105233		-0.99795	0.00837967			19	0.54814			19	0.54814				-0.748918	0.405941		-0.969697	0.405941		5.78355	0.425743				4.54244	0.12462		-0.732919	0.12766		-6.31884	0.12462			0.137822	-0.154824
				-0.997925	0.00155901		-0.997925	0.00331289			-0.997925	-0.00876942		-0.997925	0.0048719			19	0.473365			19	0.473365				-0.688312	0.405941		-0.878788	0.405941		5.82195	0.425743				4.6087	0.12462		-0.691511	0.12766		-6.14493	0.12462			-0.238241	-0.507089
				-0.9979	0.00233851		-0.9979	-0.00097438			-0.9979	-0.00584628		-0.9979	0.000779504			19	0.46449			19	0.46449				-0.688312	0.415842		-0.878788	0.415842		5.82195	0.435644				4.6087	0.12766		-0.691511	0.130699		-6.14493	0.12766			0.777558	-0.48024
				-0.997875	-0.000389752		-0.997875	-0.00253339			-0.997875	-0.00643091		-0.997875	-0.00097438			19	0.463515			19	0.463515				-0.637681	0.415842		-0.774892	0.415842		5.87446	0.435644				4.71222	0.12766		-0.625259	0.130699		-6.07039	0.12766			-0.452204	-0.218744
				-0.99785	-0.00350777		-0.99785	0.00233851			-0.99785	-0.0120823		-0.99785	-0.00292314			19	0.36259			19	0.36259				-0.637681	0.425743		-0.774892	0.425743		5.87446	0.445545				4.71222	0.133739		-0.625259	0.133739		-6.07039	0.130699			-0.0783733	-0.141049
				-0.997825	-0.00682066		-0.997825	0.00545653			-0.997825	-0.0118874		-0.997825	-0.00428727			19	0.35454			19	0.35454				-0.636364	0.425743		-0.708075	0.425743		6.1118	0.445545				4.81159	0.133739		-0.488613	0.133739		-6.02899	0.130699			0.695544	0.0103087
				-0.9978	-0.00876942		-0.9978	0.00467702			-0.9978	-0.00740529		-0.9978	-0.00837967			19	0.318315			19	0.318315				-0.636364	0.435644		-0.708075	0.435644		6.1118	0.455446				4.81159	0.136778		-0.488613	0.136778		-6.02899	0.133739			-0.0864529	0.193688
				-0.997775	-0.0130567		-0.997775	0.00311802			-0.997775	0.000584628		-0.997775	-0.00935405			19	0.31609			19	0.31609				-0.612836	0.435644		-0.662338	0.435644		6.41822	0.455446				4.86542	0.136778		-0.480331	0.136778		-5.83851	0.133739			-0.019786	-0.424852
				-0.99775	-0.0109131		-0.99775	0.00350777			-0.99775	0.00818479		-0.99775	-0.0111079			19	0.313165			19	0.313165				-0.612836	0.445545		-0.662338	0.445545		6.41822	0.465347				4.86542	0.139818		-0.480331	0.139818		-5.83851	0.136778			-0.374985	0.172395
				-0.997725	-0.00506678		-0.997725	0.000389752			-0.997725	0.00701554		-0.997725	-0.0163696			19	0.30839			19	0.30839				-0.600414	0.445545		-0.619048	0.445545		6.52588	0.465347				4.91097	0.139818		-0.447205	0.139818		-5.66046	0.136778			0.647931	0.773475
				-0.9977	-0.000779504		-0.9977	0			-0.9977	0.00662578		-0.9977	-0.0214364			19	0.294265			19	0.294265				-0.600414	0.455446		-0.619048	0.455446		6.52588	0.475248				4.91097	0.142857		-0.447205	0.142857		-5.66046	0.139818			-0.271146	-0.552878
				-0.997675	0.00721041		-0.997675	-0.00448215			-0.997675	0.00545653		-0.997675	-0.0196825			19	0.268065			19	0.268065				-0.593074	0.455446		-0.567288	0.455446		6.62526	0.475248				4.93582	0.142857		-0.405797	0.142857		-5.54037	0.139818			0.190856	-0.39585
				-0.99765	0.00876942		-0.99765	-0.00701554			-0.99765	0.00331289		-0.99765	-0.0126669			19	0.20904			19	0.20904				-0.593074	0.465347		-0.567288	0.465347		6.62526	0.485149				4.93582	0.145897		-0.405797	0.145897		-5.54037	0.142857			0.701826	-0.128257
				-0.997625	0.00740529		-0.997625	-0.00701554			-0.997625	0.00253339		-0.997625	-0.00682066			19	0.15469			19	0.15469				-0.571429	0.465347		-0.467909	0.465347		6.65424	0.485149				4.96066	0.145897		-0.401656	0.145897		-5.01863	0.142857			0.302087	-0.0656013
				-0.9976	0.00253339		-0.9976	0.00389752			-0.9976	0		-0.9976	-0.00662578			19	0.11894			19	0.11894				-0.571429	0.475248		-0.467909	0.475248		6.65424	0.49505				4.96066	0.148936		-0.401656	0.148936		-5.01863	0.145897			0.0273481	0.419317
				-0.997575	-0.00272826		-0.997575	0.00915917			-0.997575	-0.00292314		-0.997575	-0.00818479			19	0.10754			19	0.10754				-0.558442	0.475248		-0.415584	0.475248		6.67909	0.49505				5.01863	0.148936		-0.36853	0.148936		-4.58385	0.145897			1.22562	0.522328
				-0.99755	-0.000584628		-0.99755	-0.00175388			-0.99755	-0.00194876		-0.99755	-0.00779504			19	0.08544			19	0.08544				-0.558442	0.485149		-0.415584	0.485149		6.67909	0.50495				5.01863	0.151976		-0.36853	0.151976		-4.58385	0.148936			-0.13844	0.853833
				-0.997525	0.00370264		-0.997525	-0.00760016			-0.997525	-0.000584628		-0.997525	-0.00350777			19	0.02349			19	0.02349				-0.389234	0.485149		-0.251082	0.485149		6.70393	0.50495				5.06004	0.151976		-0.356108	0.151976		-4.19876	0.148936			0.27109	0.427438
				-0.9975	0.00292314		-0.9975	0.00194876			-0.9975	0.00097438		-0.9975	0.00116926			19	0.016965			19	0.016965				-0.389234	0.49505		-0.251082	0.49505		6.70393	0.514851				5.06004	0.155015		-0.356108	0.155015		-4.19876	0.151976			0.308073	0.668121
				-0.997475	-0.000584628		-0.997475	0.0111079			-0.997475	-0.000584628		-0.997475	0.00467702			19	0.00389			19	0.00389				-0.354978	0.49505		-0.212121	0.49505		6.98965	0.514851				5.06832	0.155015		-0.281573	0.155015		-3.90476	0.151976			-0.165017	0.132791
				-0.99745	-0.00350777		-0.99745	0.00214364			-0.99745	-0.00233851		-0.99745	0.00155901			19	-0.09951			19	-0.09951				-0.354978	0.50495		-0.212121	0.50495		6.98965	0.524752				5.06832	0.158055		-0.281573	0.158055		-3.90476	0.155015
				-0.997425	-0.00428727		-0.997425	-0.00506678			-0.997425	-0.00604116		-0.997425	-0.00584628			19	-0.17166			19	-0.17166				-0.329004	0.50495		0.030303	0.50495		7.09091	0.524752				5.07246	0.158055		-0.21118	0.158055		-3.87992	0.155015
				-0.9974	-0.00350777		-0.9974	-0.000779504			-0.9974	-0.00331289		-0.9974	-0.015785			19	-0.17451			19	-0.17451				-0.329004	0.514851		0.030303	0.514851		7.09091	0.534653				5.07246	0.161094		-0.21118	0.161094		-3.87992	0.158055
				-0.997375	-0.000194876		-0.997375	0.00779504			-0.997375	0.00214364		-0.997375	-0.00604116			19	-0.30021			19	-0.30021				-0.26501	0.514851		0.128364	0.514851		7.18841	0.534653				5.15942	0.161094		-0.198758	0.161094		-3.72257	0.158055
				-0.99735	0.00370264		-0.99735	0.00214364			-0.99735	0.00467702		-0.99735	0.00428727			19	-0.37461			19	-0.37461				-0.26501	0.524752		0.128364	0.524752		7.18841	0.544554				5.15942	0.164134		-0.198758	0.164134		-3.72257	0.161094
				-0.997325	0.00837967		-0.997325	-0.00311802			-0.997325	0.00253339		-0.997325	0.00993867			19	-0.38886			19	-0.38886				-0.207039	0.524752		0.405797	0.524752		7.19048	0.544554				5.26294	0.164134		-0.10352	0.164134		-3.5735	0.161094
				-0.9973	0.00779504		-0.9973	-0.0056514			-0.9973	0.00155901		-0.9973	0.0150055			19	-0.560385			19	-0.560385				-0.207039	0.534653		0.405797	0.534653		7.19048	0.554455				5.26294	0.167173		-0.10352	0.167173		-3.5735	0.164134
				-0.997275	0.00428727		-0.997275	-0.00779504			-0.997275	0		-0.997275	0.0122772			19	-0.705035			19	-0.705035				-0.194617	0.534653		0.419913	0.534653		7.26407	0.554455				5.2795	0.167173		-0.0910973	0.167173		-3.50311	0.164134
				-0.99725	0.0040924		-0.99725	-0.00818479			-0.99725	0.000389752		-0.99725	0.00993867			19	-0.72726			19	-0.72726				-0.194617	0.544554		0.419913	0.544554		7.26407	0.564356				5.2795	0.170213		-0.0910973	0.173252		-3.50311	0.167173
				-0.997225	0.00331289		-0.997225	-0.00506678			-0.997225	0.000779504		-0.997225	0.0126669			18	1.97124			18	1.97124				-0.0910973	0.544554		0.502165	0.544554		7.57764	0.564356				5.37888	0.170213		-0.0869565	0.173252		-3.26708	0.167173
				-0.9972	0.00350777		-0.9972	-0.0040924			-0.9972	-0.00214364		-0.9972	0.0155901			18	1.96779			18	1.96779				-0.0910973	0.554455		0.502165	0.554455		7.57764	0.574257				5.37888	0.173252		-0.0869565	0.176292		-3.26708	0.170213
				-0.997175	0.000779504		-0.997175	-0.00194876			-0.997175	-0.00136413		-0.997175	0.0144208			18	1.72179			18	1.72179				-0.0562771	0.554455		0.559006	0.554455		7.61905	0.574257				5.3913	0.173252		-0.057971	0.176292		-3.20083	0.170213
				-0.99715	-0.00097438		-0.99715	0.000389752			-0.99715	-0.00370264		-0.99715	0.0144208			18	1.61659			18	1.61659				-0.0562771	0.564356		0.559006	0.564356		7.61905	0.584158				5.3913	0.176292		-0.057971	0.179331		-3.20083	0.173252
				-0.997125	-0.00233851		-0.997125	0.00233851			-0.997125	-0.00292314		-0.997125	0.0136413			18	1.55164			18	1.55164				-0.0207039	0.564356		0.597403	0.564356		7.91718	0.584158				5.39545	0.176292		-0.0496894	0.179331		-3.00621	0.173252
				-0.9971	-0.00272826		-0.9971	0.000584628			-0.9971	0		-0.9971	0.0120823			18	1.52554			18	1.52554				-0.0207039	0.574257		0.597403	0.574257		7.91718	0.594059				5.39545	0.182371		-0.0496894	0.182371		-3.00621	0.176292
				-0.997075	-0.00233851		-0.997075	-0.000584628			-0.997075	0.00272826		-0.997075	0.00662578			18	1.49539			18	1.49539				-0.012987	0.574257		0.787879	0.574257		8.01656	0.594059				5.44513	0.182371		-0.0372671	0.182371		-2.77433	0.176292
				-0.99705	-0.000584628		-0.99705	0.000194876			-0.99705	0.0048719		-0.99705	0.00467702			18	1.47169			18	1.47169				-0.012987	0.584158		0.787879	0.584158		8.01656	0.60396				5.44513	0.18541		-0.0372671	0.18845		-2.77433	0.179331
				-0.997025	0.000389752		-0.997025	-0.000389752			-0.997025	-0.00311802		-0.997025	0.0114977			18	1.45716			18	1.45716				0.034632	0.584158		0.805195	0.584158		8.10766	0.60396				5.47412	0.18541		-0.0289855	0.18845		-2.73292	0.179331
				-0.997	0.00097438		-0.997	-0.00389752			-0.997	-0.0109131		-0.997	0.0146157			18	1.27741			18	1.27741				0.034632	0.594059		0.805195	0.594059		8.10766	0.613861				5.47412	0.18845		-0.0289855	0.191489		-2.73292	0.182371
				-0.996975	-0.00292314		-0.996975	-0.00760016			-0.996975	-0.00876942		-0.996975	0.00993867			18	1.27494			18	1.27494				0.0372671	0.594059		0.948052	0.594059		8.14286	0.613861				5.68116	0.18845		0.00414079	0.191489		-2.71222	0.182371
				-0.99695	-0.00448215		-0.99695	-0.0056514			-0.99695	-0.00311802		-0.99695	0.00545653			18	1.21406			18	1.21406				0.0372671	0.613861		0.948052	0.60396		8.14286	0.623762				5.68116	0.191489		0.00414079	0.197568		-2.71222	0.18541
				-0.996925	-0.00526165		-0.996925	-0.0048719			-0.996925	-0.00214364		-0.996925	0.00643091			18	1.19204			18	1.19204				0.182195	0.613861		1.08225	0.60396		8.16563	0.623762				5.69358	0.191489		0.00828157	0.197568		-2.6294	0.18541
				-0.9969	-0.00155901		-0.9969	-0.00311802			-0.9969	-0.00350777		-0.9969	0.00721041			18	1.18111			18	1.18111				0.182195	0.623762		1.08225	0.613861		8.16563	0.643564				5.69358	0.194529		0.00828157	0.200608		-2.6294	0.18845
				-0.996875	0.00292314		-0.996875	-0.000389752			-0.996875	0.00136413		-0.996875	0.00506678			18	0.97144			18	0.97144				0.190476	0.623762		1.35818	0.613861		8.27743	0.643564				5.73085	0.194529		0.0869565	0.200608		-2.57971	0.18845
				-0.99685	0.00194876		-0.99685	0			-0.99685	0.00155901		-0.99685	0.000779504			18	0.96814			18	0.96814				0.190476	0.633663		1.35818	0.623762		8.27743	0.653465				5.73085	0.197568		0.0869565	0.203647		-2.57971	0.191489
				-0.996825	0.00155901		-0.996825	-0.00155901			-0.996825	-0.000389752		-0.996825	0.00214364			18	0.92104			18	0.92104				0.316017	0.633663		1.40693	0.623762		8.294	0.653465				5.83851	0.197568		0.115942	0.203647		-2.56315	0.191489
				-0.9968	0.00253339		-0.9968	-0.00331289			-0.9968	0.00136413		-0.9968	0.00097438			18	0.91339			18	0.91339				0.316017	0.643564		1.40693	0.633663		8.294	0.663366				5.83851	0.200608		0.115942	0.206687		-2.56315	0.194529
				-0.996775	0.0048719		-0.996775	-0.00467702			-0.996775	0.00662578		-0.996775	0.00097438			18	0.87074			18	0.87074				0.354978	0.643564		1.56277	0.633663		8.36025	0.663366				5.9089	0.200608		0.198758	0.206687		-2.55901	0.194529
				-0.99675	0.0048719		-0.99675	-0.00194876			-0.99675	0.0105233		-0.99675	-0.0040924			18	0.863265			18	0.863265				0.354978	0.653465		1.56277	0.643564		8.36025	0.673267				5.9089	0.203647		0.198758	0.209726		-2.55901	0.197568
				-0.996725	0.00428727		-0.996725	0.00253339			-0.996725	0.00760016		-0.996725	-0.00623603			18	0.81414			18	0.81414				0.428571	0.653465		1.56936	0.643564		8.36853	0.673267				5.95031	0.203647		0.21118	0.209726		-2.48033	0.197568
				-0.9967	0.00097438		-0.9967	0.00253339			-0.9967	0.00779504		-0.9967	-0.00818479			18	0.80154			18	0.80154				0.428571	0.663366		1.56936	0.653465		8.36853	0.683168				5.95031	0.206687		0.21118	0.212766		-2.48033	0.200608
				-0.996675	-0.00448215		-0.996675	0.00214364			-0.996675	0.00896429		-0.996675	-0.0113028			18	0.790565			18	0.790565				0.502165	0.663366		1.62771	0.653465		8.45135	0.683168				5.97516	0.206687		0.227743	0.212766		-2.4265	0.200608
				-0.99665	-0.00292314		-0.99665	-0.00097438			-0.99665	0.00915917		-0.99665	-0.0118874			18	0.76324			18	0.76324				0.502165	0.673267		1.62771	0.663366		8.45135	0.693069				5.97516	0.209726		0.227743	0.215805		-2.4265	0.203647
				-0.996625	0.00097438		-0.996625	-0.00467702			-0.996625	0.00506678		-0.996625	-0.00798992			18	0.74579			18	0.74579				0.510823	0.673267		1.91775	0.663366		8.78355	0.693069				6.04969	0.209726		0.26501	0.215805		-2.36439	0.203647
				-0.9966	0.00214364		-0.9966	-0.00311802			-0.9966	0.00389752		-0.9966	-0.00272826			18	0.671315			18	0.671315				0.510823	0.683168		1.91775	0.673267		8.78355	0.70297				6.04969	0.212766		0.26501	0.218845		-2.36439	0.206687
				-0.996575	0.00097438		-0.996575	-0.000389752			-0.996575	0.00604116		-0.996575	0.00155901			18	0.61369			18	0.61369				0.6294	0.683168		1.9697	0.673267		8.78675	0.70297				6.10766	0.212766		0.293996	0.218845		-2.14079	0.206687
				-0.99655	-0.00292314		-0.99655	-0.00116926			-0.99655	0.00798992		-0.99655	0.00721041			18	0.58254			18	0.58254				0.6294	0.693069		1.9697	0.683168		8.78675	0.712871				6.10766	0.215805		0.293996	0.221884		-2.14079	0.209726
				-0.996525	-0.00623603		-0.996525	-0.00370264			-0.996525	0.00526165		-0.996525	0.00837967			18	0.49969			18	0.49969				0.658009	0.693069		2.41558	0.683168		8.93168	0.712871				6.49689	0.215805		0.302277	0.221884		-1.89648	0.209726
				-0.9965	-0.00389752		-0.9965	-0.00643091			-0.9965	0.00214364		-0.9965	0.0107182			18	0.46409			18	0.46409				0.658009	0.70297		2.41558	0.693069		8.93168	0.722772				6.49689	0.218845		0.302277	0.224924		-1.89648	0.212766
				-0.996475	-0.00097438		-0.996475	-0.00643091			-0.996475	0		-0.996475	0.00682066			18	0.42089			18	0.42089				0.670996	0.70297		2.81988	0.693069		9.31677	0.722772				6.52174	0.218845		0.360248	0.224924		-1.7971	0.212766
				-0.99645	0.00155901		-0.99645	-0.0056514			-0.99645	0.00311802		-0.99645	0			18	0.37104			18	0.37104				0.670996	0.712871		2.81988	0.70297		9.31677	0.732673				6.52174	0.221884		0.360248	0.227964		-1.7971	0.215805
				-0.996425	0.00721041		-0.996425	-0.00253339			-0.996425	0.00311802		-0.996425	-0.00370264			18	0.354515			18	0.354515				0.679654	0.712871		2.89177	0.70297		9.33333	0.732673				6.57143	0.221884		0.405797	0.227964		-1.6853	0.215805
				-0.9964	0.00662578		-0.9964	0.00311802			-0.9964	0.00506678		-0.9964	-0.0107182			18	0.33024			18	0.33024				0.679654	0.722772		2.89177	0.712871		9.33333	0.742574				6.57143	0.224924		0.405797	0.231003		-1.6853	0.218845
				-0.996375	0.00506678		-0.996375	0.0107182			-0.996375	0.00292314		-0.996375	-0.0103284			18	0.208915			18	0.208915				0.766234	0.722772		2.98137	0.712871		9.41201	0.742574				6.66667	0.224924		0.418219	0.231003		-1.47412	0.218845
				-0.99635	0.0056514		-0.99635	0.00954892			-0.99635	-0.00116926		-0.99635	-0.0130567			18	0.203915			18	0.203915				0.766234	0.732673		2.98137	0.722772		9.41201	0.752475				6.66667	0.227964		0.418219	0.234043		-1.47412	0.221884
				-0.996325	0.00428727		-0.996325	0.00721041			-0.996325	-0.00623603		-0.996325	-0.0183183			18	0.190065			18	0.190065				0.902692	0.732673		3.09317	0.722772		9.64803	0.752475				6.71222	0.227964		0.47619	0.234043		-1.43271	0.221884
				-0.9963	0.00233851		-0.9963	0.00798992			-0.9963	-0.0105233		-0.9963	-0.0233851			18	0.16749			18	0.16749				0.902692	0.742574		3.09317	0.732673		9.64803	0.762376				6.71222	0.231003		0.47619	0.237082		-1.43271	0.224924
				-0.996275	-0.00155901		-0.996275	0.0116926			-0.996275	-0.000389752		-0.996275	-0.0218261			18	0.16014			18	0.16014				1.18182	0.742574		3.16017	0.732673		10.1255	0.762376				6.73292	0.231003		0.480331	0.237082		-1.32091	0.224924
				-0.99625	-0.00175388		-0.99625	0.00779504			-0.99625	0.00818479		-0.99625	-0.0118874			18	-0.07901			18	-0.07901				1.18182	0.752475		3.16017	0.742574		10.1255	0.772277				6.73292	0.234043		0.480331	0.240122		-1.32091	0.227964
				-0.996225	-0.000584628		-0.996225	0.00506678			-0.996225	0.00896429		-0.996225	-0.00155901			18	-0.22971			18	-0.22971				1.3913	0.752475		3.16883	0.742574		10.824	0.772277				6.77847	0.234043		0.550725	0.240122		-1.28364	0.227964
				-0.9962	0.00175388		-0.9962	-0.00214364			-0.9962	0.00760016		-0.9962	0.00857454			18	-0.32396			18	-0.32396				1.3913	0.762376		3.16883	0.752475		10.824	0.782178				6.77847	0.237082		0.550725	0.246201		-1.28364	0.231003
				-0.996175	0.00175388		-0.996175	-0.00604116			-0.996175	0.0056514		-0.996175	0.00545653			18	-0.37826			18	-0.37826				1.58874	0.762376		3.41126	0.752475		11.4576	0.782178				6.79089	0.237082		0.587992	0.246201		-1.25466	0.231003
				-0.99615	-0.00233851		-0.99615	-0.00389752			-0.99615	0.00253339		-0.99615	0.00428727			18	-0.68881			18	-0.68881				1.58874	0.772277		3.41126	0.762376		11.4576	0.792079				6.79089	0.240122		0.587992	0.24924		-1.25466	0.234043
				-0.996125	-0.00740529		-0.996125	0.00370264			-0.996125	0.00136413		-0.996125	0.00545653			18	-0.878285			18	-0.878285				1.70563	0.772277		3.41558	0.762376		11.645	0.792079				6.81988	0.240122		0.637681	0.24924		-1.20911	0.234043
				-0.9961	-0.00701554		-0.9961	0.00545653			-0.9961	0.00428727		-0.9961	0.00935405			18	-0.888185			18	-0.888185				1.70563	0.782178		3.41558	0.772277		11.645	0.80198				6.81988	0.243161		0.637681	0.25228		-1.20911	0.237082
				-0.996075	-0.00545653		-0.996075	0.00701554			-0.996075	0.00584628		-0.996075	0.0134464			18	-0.96016			18	-0.96016				1.78788	0.782178		3.7013	0.772277		12.3271	0.80198				6.9441	0.243161		0.703934	0.25228		-1.1677	0.237082
				-0.99605	-0.00136413		-0.99605	0.00136413			-0.99605	0.00623603		-0.99605	0.0163696			18	-0.96326			18	-0.96326				1.78788	0.792079		3.7013	0.782178		12.3271	0.811881				6.9441	0.246201		0.703934	0.255319		-1.1677	0.240122
				-0.996025	0.000584628		-0.996025	-0.00643091			-0.996025	0.00331289		-0.996025	0.0169542			18	-0.96641			18	-0.96641				2.10352	0.792079		4.03896	0.782178		12.4265	0.811881				7.0766	0.246201		0.749482	0.255319		-1.14286	0.240122
				-0.996	-0.000194876		-0.996	-0.00643091			-0.996	0.00175388		-0.996	0.0163696			18	-0.97871			18	-0.97871				2.10352	0.80198		4.03896	0.792079		12.4265	0.821782				7.0766	0.24924		0.749482	0.258359		-1.14286	0.243161
				-0.995975	-0.00194876		-0.995975	-0.0048719			-0.995975	0.00331289		-0.995975	0.0105233			18	-0.99986			18	-0.99986				2.72294	0.80198		4.07039	0.792079		12.6377	0.821782				7.09731	0.24924		0.770186	0.258359		-1.13458	0.243161
				-0.99595	-0.00389752		-0.99595	-0.00194876			-0.99595	0.00292314		-0.99595	0.00896429			17	1.99604			17	1.99604				2.72294	0.811881		4.07039	0.80198		12.6377	0.831683				7.09731	0.25228		0.770186	0.261398		-1.13458	0.246201
				-0.995925	-0.00643091		-0.995925	0.000779504			-0.995925	0.000584628		-0.995925	0.0111079			17	1.89804			17	1.89804				2.81818	0.811881		4.61698	0.80198		12.6537	0.831683				7.10559	0.25228		0.786749	0.261398		-1.12215	0.246201
				-0.9959	-0.00467702		-0.9959	0.00233851			-0.9959	-0.00370264		-0.9959	0.00798992			17	1.87994			17	1.87994				2.81818	0.821782		4.61698	0.811881		12.6537	0.841584				7.10559	0.258359		0.786749	0.264438		-1.12215	0.24924
				-0.995875	-0.00194876		-0.995875	0.00467702			-0.995875	-0.00798992		-0.995875	-0.00175388			17	1.77491			17	1.77491				2.82402	0.821782		4.68831	0.811881		12.7453	0.841584				7.18427	0.258359		0.819876	0.264438		-1.11387	0.24924
				-0.99585	-0.00175388		-0.99585	0.00292314			-0.99585	-0.0136413		-0.99585	-0.0152003			17	1.77204			17	1.77204				2.82402	0.831683		4.68831	0.821782		12.7453	0.851485				7.18427	0.261398		0.819876	0.267477		-1.11387	0.25228
				-0.995825	-0.00331289		-0.995825	-0.00253339			-0.995825	-0.0103284		-0.995825	-0.0194876			17	1.68044			17	1.68044				2.8961	0.831683		4.79654	0.821782		12.9827	0.851485				7.22153	0.261398		0.836439	0.267477		-1.09731	0.25228
				-0.9958	-0.00526165		-0.9958	-0.000779504			-0.9958	-0.00370264		-0.9958	-0.0233851			17	1.61401			17	1.61401				2.8961	0.841584		4.79654	0.831683		12.9827	0.861386				7.22153	0.264438		0.836439	0.270517		-1.09731	0.258359
				-0.995775	-0.0056514		-0.995775	-0.000389752			-0.995775	-0.00662578		-0.995775	-0.0222159			17	1.60734			17	1.60734				3.01035	0.841584		5.16017	0.831683		13.368	0.861386				7.30435	0.264438		0.939959	0.270517		-1.06004	0.258359
				-0.99575	-0.00331289		-0.99575	-0.00428727			-0.99575	-0.00545653		-0.99575	-0.0241646			17	1.58126			17	1.58126				3.01035	0.851485		5.16017	0.841584		13.368	0.871287				7.30435	0.267477		0.939959	0.273556		-1.06004	0.261398
				-0.995725	-0.00136413		-0.995725	-0.00857454			-0.995725	-0.00214364		-0.995725	-0.0202671			17	1.51962			17	1.51962				3.32919	0.851485		5.34576	0.841584		13.4719	0.871287				7.31677	0.267477		0.964803	0.273556		-1.05176	0.261398
				-0.9957	-0.00136413		-0.9957	-0.00292314			-0.9957	0.000194876		-0.9957	-0.0142259			17	1.25826			17	1.25826				3.32919	0.861386		5.34576	0.851485		13.4719	0.881188				7.31677	0.270517		0.964803	0.276596		-1.05176	0.264438
				-0.995675	-0.00194876		-0.995675	0.00311802			-0.995675	-0.00526165		-0.995675	-0.0120823			17	1.10159			17	1.10159				3.4329	0.861386		5.61039	0.851485		13.5541	0.881188				7.33747	0.270517		0.981366	0.276596		-1.03934	0.264438
				-0.99565	-0.00311802		-0.99565	0.0040924			-0.99565	-0.00701554		-0.99565	-0.00740529			17	0.92499			17	0.92499				3.4329	0.871287		5.61039	0.861386		13.5541	0.891089				7.33747	0.273556		0.981366	0.279635		-1.03934	0.270517
				-0.995625	-0.00506678		-0.995625	0.00272826			-0.995625	-0.00194876		-0.995625	0			17	0.88784			17	0.88784				3.71843	0.871287		5.77226	0.861386		15.0087	0.891089				7.34576	0.273556		0.985507	0.279635		-0.993789	0.270517
				-0.9956	-0.00311802		-0.9956	0.000194876			-0.9956	0.00467702		-0.9956	0.0056514			17	0.86139			17	0.86139				3.71843	0.881188		5.77226	0.871287		15.0087	0.90099				7.34576	0.276596		0.985507	0.282675		-0.993789	0.273556
				-0.995575	-0.00214364		-0.995575	-0.00253339			-0.995575	0.000779504		-0.995575	0.00623603			17	0.84954			17	0.84954				3.76812	0.881188		5.92133	0.871287		17.0779	0.90099				7.36646	0.276596		1.00621	0.282675		-0.94824	0.273556
				-0.99555	-0.00116926		-0.99555	-0.00370264			-0.99555	-0.00545653		-0.99555	0.00253339			17	0.82049			17	0.82049				3.76812	0.891089		5.92133	0.881188		17.0779	0.910891				7.36646	0.279635		1.00621	0.285714		-0.94824	0.276596
				-0.995525	-0.00097438		-0.995525	-0.00721041			-0.995525	-0.00526165		-0.995525	0.00116926			17	0.79844			17	0.79844				3.84416	0.891089		6.25673	0.881188		18.0087	0.910891				7.39959	0.279635		1.0766	0.285714		-0.919255	0.276596
				-0.9955	-0.000389752		-0.9955	-0.0113028			-0.9955	-0.0056514		-0.9955	0.000389752			17	0.771365			17	0.771365				3.84416	0.90099		6.25673	0.891089		18.0087	0.920792				7.39959	0.282675		1.0766	0.288754		-0.919255	0.279635
				-0.995475	0.000194876		-0.995475	-0.00935405			-0.995475	-0.00253339		-0.995475	0.00623603			17	0.765765			17	0.765765				3.87992	0.90099		6.70393	0.891089		19.7359	0.920792				7.40787	0.282675		1.08489	0.288754		-0.910973	0.279635
				-0.99545	0.00194876		-0.99545	-0.00233851			-0.99545	-0.00253339		-0.99545	0.00837967			17	0.761465			17	0.761465				3.87992	0.910891		6.70393	0.90099		19.7359	0.930693				7.40787	0.285714		1.08489	0.291793		-0.910973	0.282675
				-0.995425	0.00389752		-0.995425	0.00993867			-0.995425	-0.00331289		-0.995425	0.00779504			17	0.75874			17	0.75874				3.95031	0.910891		7.15528	0.90099		19.8528	0.930693				7.44099	0.285714		1.10145	0.291793		-0.890269	0.282675
				-0.9954	0.00311802		-0.9954	0.00876942			-0.9954	0.00194876		-0.9954	0.00506678			17	0.661015			17	0.661015				3.95031	0.920792		7.15528	0.910891		19.8528	0.940594				7.44099	0.288754		1.10145	0.294833		-0.890269	0.285714
				-0.995375	0.00272826		-0.995375	0.00779504			-0.995375	0.00448215		-0.995375	0.00253339			17	0.557315			17	0.557315				4.25108	0.920792		7.25052	0.910891		20.5887	0.940594				7.45342	0.288754		1.15528	0.294833		-0.886128	0.285714
				-0.99535	-0.000194876		-0.99535	-0.00136413			-0.99535	0.00545653		-0.99535	0			17	0.52719			17	0.52719				4.25108	0.930693		7.25052	0.920792		20.5887	0.950495				7.45342	0.291793		1.15528	0.297872		-0.886128	0.288754
				-0.995325	-0.00253339		-0.995325	-0.00643091			-0.995325	0.00175388		-0.995325	0.00545653			17	0.51674			17	0.51674				4.44306	0.930693		7.33333	0.920792		21.1905	0.950495				7.46998	0.291793		1.20083	0.297872		-0.811594	0.288754
				-0.9953	-0.00097438		-0.9953	-0.00662578			-0.9953	0.00097438		-0.9953	0.0144208			17	0.48804			17	0.48804				4.44306	0.940594		7.33333	0.930693		21.1905	0.960396				7.46998	0.294833		1.20083	0.300912		-0.811594	0.294833
				-0.995275	0.00389752		-0.995275	0.000584628			-0.995275	0.0040924		-0.995275	0.0200722			17	0.471815			17	0.471815				4.48033	0.940594		7.64389	0.930693		21.2035	0.960396				7.55694	0.294833		1.22153	0.300912		-0.782609	0.294833
				-0.99525	0.00682066		-0.99525	0.000779504			-0.99525	0.00506678		-0.99525	0.0187081			17	0.46714			17	0.46714				4.48033	0.950495		7.64389	0.940594		21.2035	0.970297				7.55694	0.297872		1.22153	0.303951		-0.782609	0.297872
				-0.995225	0.00760016		-0.995225	0.0048719			-0.995225	0.00331289		-0.995225	0.0103284			17	0.464165			17	0.464165				5	0.950495		8.17749	0.940594		23.2468	0.970297				7.63147	0.297872		1.42857	0.303951		-0.778468	0.297872
				-0.9952	0.00740529		-0.9952	0.00760016			-0.9952	0.00136413		-0.9952	0.00097438			17	0.45889			17	0.45889				5	0.960396		8.17749	0.950495		23.2468	0.980198				7.63147	0.300912		1.42857	0.306991		-0.778468	0.300912
				-0.995175	0.00818479		-0.995175	0.00818479			-0.995175	-0.000389752		-0.995175	0.00311802			17	0.41534			17	0.41534				5.01299	0.960396		8.36853	0.950495		24	0.980198				7.82609	0.300912		1.44928	0.306991		-0.73706	0.300912
				-0.99515	0.00915917		-0.99515	0.00136413			-0.99515	-0.00097438		-0.99515	0.00214364			17	0.41234			17	0.41234				5.01299	0.970297		8.36853	0.960396		24	0.990099				7.82609	0.303951		1.44928	0.31003		-0.73706	0.303951
				-0.995125	0.00935405		-0.995125	-0.0048719			-0.995125	0.00233851		-0.995125	-0.00292314			17	0.39124			17	0.39124				5.74892	0.970297		8.93168	0.960396		30.4416	0.990099				7.95859	0.303951		1.45342	0.31003		-0.724638	0.303951
				-0.9951	0.00545653		-0.9951	-0.00214364			-0.9951	0.00876942		-0.9951	-0.00506678			17	0.36339			17	0.36339				5.74892	0.980198		8.93168	0.970297		30.4416	1				7.95859	0.306991		1.45342	0.31307		-0.724638	0.306991
				-0.995075	-0.00194876		-0.995075	0.00350777			-0.995075	0.0111079		-0.995075	-0.00155901			17	0.30909			17	0.30909				10.2319	0.980198		9.64803	0.970297		Inf	1				8.07453	0.306991		1.46584	0.31307		-0.716356	0.306991
				-0.99505	-0.00604116		-0.99505	0.00194876			-0.99505	0.0140311		-0.99505	-0.00175388			17	0.273215			17	0.273215				10.2319	0.990099		9.64803	0.980198							8.07453	0.31003		1.46584	0.316109		-0.716356	0.31003
				-0.995025	-0.0048719		-0.995025	0.00194876			-0.995025	0.0146157		-0.995025	-0.00506678			17	0.253615			17	0.253615				12.7909	0.990099		12.3271	0.980198							8.17805	0.31003		1.48654	0.316109		-0.708075	0.31003
				-0.995	-0.00448215		-0.995	0.000779504			-0.995	0.0107182		-0.995	-0.0120823			17	0.15929			17	0.15929				12.7909	1		12.3271	0.990099							8.17805	0.31307		1.48654	0.319149		-0.708075	0.31307
				-0.994975	-0.00448215		-0.994975	0.00272826			-0.994975	-0.000584628		-0.994975	-0.0126669			17	0.06749			17	0.06749				Inf	1		12.6377	0.990099							8.19462	0.31307		1.51967	0.319149		-0.679089	0.31307
				-0.99495	-0.00194876		-0.99495	0.00545653			-0.99495	-0.00935405		-0.99495	-0.0146157			17	0.02334			17	0.02334							12.6377	1							8.19462	0.316109		1.51967	0.328267		-0.679089	0.316109
				-0.994925	0.00175388		-0.994925	0.00584628			-0.994925	-0.00526165		-0.994925	-0.0192927			17	0.01944			17	0.01944							Inf	1							8.19876	0.316109		1.52381	0.328267		-0.654244	0.316109
				-0.9949	0.00467702		-0.9949	0.00116926			-0.9949	0.00448215		-0.9949	-0.0161747			17	-0.18071			17	-0.18071															8.19876	0.319149		1.52381	0.334347		-0.654244	0.319149
				-0.994875	0.00467702		-0.994875	-0.00331289			-0.994875	0.00701554		-0.994875	-0.0105233			17	-0.20691			17	-0.20691															8.21532	0.319149		1.53209	0.334347		-0.650103	0.319149
				-0.99485	0.00311802		-0.99485	-0.000584628			-0.99485	0.0056514		-0.99485	-0.00428727			17	-0.577485			17	-0.577485															8.21532	0.322188		1.53209	0.337386		-0.650103	0.322188
				-0.994825	0.00194876		-0.994825	0.00194876			-0.994825	0		-0.994825	-0.00798992			17	-0.58276			17	-0.58276															8.26087	0.322188		1.53623	0.337386		-0.600414	0.322188
				-0.9948	0.00467702		-0.9948	0.00233851			-0.9948	0.000584628		-0.9948	-0.0103284			17	-0.61726			17	-0.61726															8.26087	0.325228		1.53623	0.340426		-0.600414	0.325228
				-0.994775	0.00584628		-0.994775	0.00214364			-0.994775	-0.000779504		-0.994775	-0.00389752			17	-0.72631			17	-0.72631															8.29814	0.325228		1.66046	0.340426		-0.596273	0.325228
				-0.99475	-0.000389752		-0.99475	0.00233851			-0.99475	-0.000584628		-0.99475	-0.00136413			17	-0.75551			17	-0.75551															8.29814	0.328267		1.66046	0.343465		-0.596273	0.328267
				-0.994725	-0.00584628		-0.994725	0.000584628			-0.994725	-0.00467702		-0.994725	-0.0056514			17	-0.75746			17	-0.75746															8.30228	0.328267		1.67288	0.343465		-0.554865	0.328267
				-0.9947	-0.00467702		-0.9947	0.00272826			-0.9947	-0.00818479		-0.9947	-0.0144208			17	-0.788135			17	-0.788135															8.30228	0.331307		1.67288	0.346505		-0.554865	0.331307
				-0.994675	-0.00370264		-0.994675	0.00253339			-0.994675	-0.00760016		-0.994675	-0.020462			17	-0.79756			17	-0.79756															8.35611	0.331307		1.67702	0.346505		-0.546584	0.331307
				-0.99465	-0.00506678		-0.99465	-0.000389752			-0.99465	-0.00467702		-0.99465	-0.026698			17	-0.817285			17	-0.817285															8.35611	0.334347		1.67702	0.349544		-0.546584	0.334347
				-0.994625	-0.00467702		-0.994625	-0.00428727			-0.994625	-0.00584628		-0.994625	-0.0233851			17	-0.87151			17	-0.87151															8.49275	0.334347		1.6853	0.349544		-0.513458	0.334347
				-0.9946	0.000194876		-0.9946	-0.00389752			-0.9946	-0.000389752		-0.9946	-0.0179286			17	-0.90056			17	-0.90056															8.49275	0.337386		1.6853	0.352584		-0.513458	0.337386
				-0.994575	0.00194876		-0.994575	-0.00370264			-0.994575	-0.00194876		-0.994575	-0.0200722			17	-0.92056			17	-0.92056															8.53416	0.337386		1.69358	0.352584		-0.467909	0.337386
				-0.99455	-0.00311802		-0.99455	-0.0048719			-0.99455	-0.00136413		-0.99455	-0.02358			16	1.98996			16	1.98996															8.53416	0.340426		1.69358	0.355623		-0.467909	0.340426
				-0.994525	-0.00467702		-0.994525	-0.00292314			-0.994525	-0.00214364		-0.994525	-0.0185132			16	1.98489			16	1.98489															8.64182	0.340426		1.69772	0.355623		-0.426501	0.340426
				-0.9945	-0.00175388		-0.9945	0.00233851			-0.9945	-0.00545653		-0.9945	-0.00993867			16	1.74521			16	1.74521															8.64182	0.343465		1.69772	0.358663		-0.426501	0.343465
				-0.994475	0		-0.994475	0.0097438			-0.994475	-0.00584628		-0.994475	-0.00428727			16	1.51399			16	1.51399															8.69565	0.343465		1.70186	0.358663		-0.401656	0.343465
				-0.99445	-0.00526165		-0.99445	0.00448215			-0.99445	-0.0105233		-0.99445	0.00643091			16	1.50834			16	1.50834															8.69565	0.346505		1.70186	0.361702		-0.401656	0.346505
				-0.994425	-0.00935405		-0.994425	-0.00155901			-0.994425	-0.0111079		-0.994425	0.0103284			16	1.47574			16	1.47574															8.7619	0.346505		1.706	0.361702		-0.376812	0.346505
				-0.9944	-0.0040924		-0.9944	-0.00311802			-0.9944	-0.0130567		-0.9944	0.00876942			16	1.46839			16	1.46839															8.7619	0.349544		1.706	0.367781		-0.376812	0.349544
				-0.994375	0.000779504		-0.994375	-0.00155901			-0.994375	-0.00662578		-0.994375	0.00935405			16	1.43319			16	1.43319															8.78261	0.349544		1.71014	0.367781		-0.339545	0.349544
				-0.99435	0.000389752		-0.99435	-0.00526165			-0.99435	-0.00682066		-0.99435	0.00604116			16	1.39899			16	1.39899															8.78261	0.355623		1.71014	0.370821		-0.339545	0.352584
				-0.994325	-0.00233851		-0.994325	-0.00760016			-0.994325	-0.0126669		-0.994325	0.00760016			16	1.35914			16	1.35914															8.82816	0.355623		1.71429	0.370821		-0.298137	0.352584
				-0.9943	-0.00292314		-0.9943	-0.0056514			-0.9943	-0.0142259		-0.9943	0.00721041			16	1.17384			16	1.17384															8.82816	0.358663		1.71429	0.37386		-0.298137	0.355623
				-0.994275	-0.00896429		-0.994275	0.000194876			-0.994275	-0.00935405		-0.994275	0.00545653			16	1.05464			16	1.05464															8.88613	0.358663		1.75569	0.37386		-0.269151	0.355623
				-0.99425	-0.00837967		-0.99425	-0.00136413			-0.99425	-0.00389752		-0.99425	0.00584628			16	0.963465			16	0.963465															8.88613	0.361702		1.75569	0.3769		-0.269151	0.358663
				-0.994225	-0.00682066		-0.994225	0.000779504			-0.994225	0.00155901		-0.994225	0.0120823			16	0.95499			16	0.95499															8.93168	0.361702		1.75983	0.3769		-0.190476	0.358663
				-0.9942	-0.00253339		-0.9942	0.00233851			-0.9942	0.0107182		-0.9942	0.0177337			16	0.92324			16	0.92324															8.93168	0.364742		1.75983	0.379939		-0.190476	0.364742
				-0.994175	0.00097438		-0.994175	0.00448215			-0.994175	0.00779504		-0.994175	0.0196825			16	0.91699			16	0.91699															9.03106	0.364742		1.76812	0.379939		-0.182195	0.364742
				-0.99415	0.00136413		-0.99415	0.00526165			-0.99415	0.00584628		-0.99415	0.0222159			16	0.90394			16	0.90394															9.03106	0.367781		1.76812	0.382979		-0.182195	0.367781
				-0.994125	0.00097438		-0.994125	0.00662578			-0.994125	0.00428727		-0.994125	0.0255288			16	0.80499			16	0.80499															9.08903	0.367781		1.86335	0.382979		-0.144927	0.367781
				-0.9941	0.00097438		-0.9941	0.00837967			-0.9941	0.0107182		-0.9941	0.0255288			16	0.77999			16	0.77999															9.08903	0.370821		1.86335	0.386018		-0.144927	0.370821
				-0.994075	0.00214364		-0.994075	0.00935405			-0.994075	0.00818479		-0.994075	0.0210466			16	0.72914			16	0.72914															9.10145	0.370821		1.87992	0.386018		-0.140787	0.370821
				-0.99405	0.00448215		-0.99405	0.0111079			-0.99405	0.00740529		-0.99405	0.0153952			16	0.70889			16	0.70889															9.10145	0.37386		1.87992	0.389058		-0.140787	0.37386
				-0.994025	0.0048719		-0.994025	0.00682066			-0.994025	0.00370264		-0.994025	0.0152003			16	0.663415			16	0.663415															9.12215	0.37386		1.96273	0.389058		-0.0786749	0.37386
				-0.994	0.00214364		-0.994	0.00604116			-0.994	0.00350777		-0.994	0.0134464			16	0.657515			16	0.657515															9.12215	0.3769		1.96273	0.392097		-0.0786749	0.3769
				-0.993975	-0.00292314		-0.993975	-0.000584628			-0.993975	0.0056514		-0.993975	0.0114977			16	0.62219			16	0.62219															9.14286	0.3769		2.05383	0.392097		-0.0538302	0.3769
				-0.99395	-0.00272826		-0.99395	-0.00370264			-0.99395	0.00779504		-0.99395	0.0111079			16	0.61959			16	0.61959															9.14286	0.379939		2.05383	0.395137		-0.0538302	0.379939
				-0.993925	-0.00136413		-0.993925	-0.00779504			-0.993925	0.00428727		-0.993925	0.0120823			16	0.60784			16	0.60784															9.19255	0.379939		2.08282	0.395137		-0.0372671	0.379939
				-0.9939	0.00292314		-0.9939	-0.00721041			-0.9939	-0.00155901		-0.9939	0.0122772			16	0.58029			16	0.58029															9.19255	0.382979		2.08282	0.398176		-0.0372671	0.382979
				-0.993875	0.00389752		-0.993875	-0.00311802			-0.993875	-0.00721041		-0.993875	0.0103284			16	0.55844			16	0.55844															9.25052	0.382979		2.25673	0.398176		0.0289855	0.382979
				-0.99385	0.000779504		-0.99385	0			-0.99385	-0.00721041		-0.99385	0.00370264			16	0.51469			16	0.51469															9.25052	0.386018		2.25673	0.401216		0.0289855	0.386018
				-0.993825	-0.00272826		-0.993825	0.00097438			-0.993825	-0.00311802		-0.993825	-0.00389752			16	0.46419			16	0.46419															9.26294	0.386018		2.34369	0.401216		0.0372671	0.386018
				-0.9938	-0.00097438		-0.9938	0.00175388			-0.9938	0.00311802		-0.9938	-0.00272826			16	0.41854			16	0.41854															9.26294	0.389058		2.34369	0.404255		0.0372671	0.389058
				-0.993775	-0.000194876		-0.993775	0.00253339			-0.993775	0.00175388		-0.993775	0.0048719			16	0.40924			16	0.40924															9.33747	0.389058		2.35611	0.404255		0.0538302	0.389058
				-0.99375	-0.00136413		-0.99375	0.00331289			-0.99375	0.00097438		-0.99375	0.0132516			16	0.375615			16	0.375615															9.33747	0.392097		2.35611	0.410334		0.0538302	0.395137
				-0.993725	-0.00389752		-0.993725	0.00311802			-0.993725	-0.00370264		-0.993725	0.0118874			16	0.369415			16	0.369415															9.36232	0.392097		2.4265	0.410334		0.10766	0.395137
				-0.9937	-0.0097438		-0.9937	-0.00526165			-0.9937	-0.00682066		-0.9937	0.00818479			16	0.309015			16	0.309015															9.36232	0.395137		2.4265	0.413374		0.10766	0.398176
				-0.993675	-0.0126669		-0.993675	-0.0124721			-0.993675	-0.00331289		-0.993675	0.0056514			16	0.259065			16	0.259065															9.59006	0.395137		2.45549	0.413374		0.144928	0.398176
				-0.99365	-0.00584628		-0.99365	-0.0109131			-0.99365	-0.00292314		-0.99365	0.0040924			16	0.11744			16	0.11744															9.59006	0.398176		2.45549	0.416413		0.144928	0.401216
				-0.993625	0.00506678		-0.993625	-0.000584628			-0.993625	-0.00857454		-0.993625	0.00604116			16	0.106965			16	0.106965															9.6853	0.398176		2.47619	0.416413		0.15735	0.401216
				-0.9936	0.00740529		-0.9936	0.00331289			-0.9936	-0.00584628		-0.9936	0.0122772			16	0.099965			16	0.099965															9.6853	0.401216		2.47619	0.422492		0.15735	0.404255
				-0.993575	0.00623603		-0.993575	0.00896429			-0.993575	-0.000779504		-0.993575	0.0122772			16	0.08449			16	0.08449															9.85921	0.401216		2.49275	0.422492		0.194617	0.404255
				-0.99355	0.00311802		-0.99355	0.00779504			-0.99355	0.00331289		-0.99355	0.0114977			16	0.06084			16	0.06084															9.85921	0.404255		2.49275	0.425532		0.194617	0.407295
				-0.993525	0.00175388		-0.993525	0.00253339			-0.993525	-0.000194876		-0.993525	0.00643091			16	0.05899			16	0.05899															9.92133	0.404255		2.49689	0.425532		0.207039	0.407295
				-0.9935	0.00292314		-0.9935	-0.000584628			-0.9935	-0.00643091		-0.9935	0.00350777			16	0.05669			16	0.05669															9.92133	0.410334		2.49689	0.428571		0.207039	0.410334
				-0.993475	0.00389752		-0.993475	-0.00097438			-0.993475	-0.0107182		-0.993475	-0.000584628			16	0.04629			16	0.04629															10.029	0.410334		2.54658	0.428571		0.21118	0.410334
				-0.99345	0.00389752		-0.99345	-0.000194876			-0.99345	-0.0146157		-0.99345	-0.00643091			16	0.01799			16	0.01799															10.029	0.413374		2.54658	0.431611		0.21118	0.413374
				-0.993425	0.00701554		-0.993425	0.00292314			-0.993425	-0.00837967		-0.993425	-0.00935405			16	-0.25571			16	-0.25571															10.2899	0.413374		2.55072	0.431611		0.269151	0.413374
				-0.9934	0.0111079		-0.9934	-0.00194876			-0.9934	-0.000584628		-0.9934	-0.00915917			16	-0.33961			16	-0.33961															10.2899	0.416413		2.55072	0.43465		0.269151	0.416413
				-0.993375	0.0136413		-0.993375	-0.00175388			-0.993375	0.00311802		-0.993375	-0.0107182			16	-0.39516			16	-0.39516															10.4265	0.416413		2.58799	0.43465		0.339545	0.416413
				-0.99335	0.00604116		-0.99335	0.00350777			-0.99335	0.00448215		-0.99335	-0.00623603			16	-0.456135			16	-0.456135															10.4265	0.419453		2.58799	0.43769		0.339545	0.419453
				-0.993325	0.00272826		-0.993325	0.0101336			-0.993325	0.00292314		-0.993325	0.00097438			16	-0.516485			16	-0.516485															10.6046	0.419453		2.6294	0.43769		0.364389	0.419453
				-0.9933	0.000389752		-0.9933	0.00584628			-0.9933	0.00292314		-0.9933	0.00233851			16	-0.58066			16	-0.58066															10.6046	0.422492		2.6294	0.440729		0.364389	0.422492
				-0.993275	-0.000779504		-0.993275	0.00428727			-0.993275	0.00194876		-0.993275	-0.00428727			16	-0.58696			16	-0.58696															10.7619	0.422492		2.68323	0.440729		0.401656	0.422492
				-0.99325	-0.000389752		-0.99325	0.00467702			-0.99325	0.00389752		-0.99325	-0.0103284			16	-0.64991			16	-0.64991															10.7619	0.428571		2.68323	0.443769		0.401656	0.425532
				-0.993225	0.00175388		-0.993225	0.00662578			-0.993225	0.00253339		-0.993225	-0.00818479			16	-0.70411			16	-0.70411															11.0062	0.428571		2.71636	0.443769		0.414079	0.425532
				-0.9932	0.00233851		-0.9932	0.00155901			-0.9932	0.00448215		-0.9932	-0.00721041			16	-0.821285			16	-0.821285															11.0062	0.431611		2.71636	0.446809		0.414079	0.428571
				-0.993175	0.00311802		-0.993175	-0.00448215			-0.993175	0.00194876		-0.993175	-0.00545653			16	-0.91536			16	-0.91536															11.4451	0.431611		2.74948	0.446809		0.426501	0.428571
				-0.99315	0.00272826		-0.99315	-0.00721041			-0.99315	0.00272826		-0.99315	-0.00935405			16	-0.91891			16	-0.91891															11.4451	0.43465		2.74948	0.452888		0.426501	0.431611
				-0.993125	0.00311802		-0.993125	-0.0101336			-0.993125	0.00350777		-0.993125	-0.00876942			15	1.89434			15	1.89434															11.4783	0.43465		2.79089	0.452888		0.47205	0.431611
				-0.9931	0.00428727		-0.9931	-0.0126669			-0.9931	0.00428727		-0.9931	-0.0146157			15	1.75374			15	1.75374															11.4783	0.43769		2.79089	0.458967		0.47205	0.43465
				-0.993075	0.00526165		-0.993075	-0.0124721			-0.993075	0.000194876		-0.993075	-0.0179286			15	1.72004			15	1.72004															11.5611	0.43769		2.79917	0.458967		0.571429	0.43465
				-0.99305	0.0040924		-0.99305	-0.00682066			-0.99305	0.000389752		-0.99305	-0.0194876			15	1.62942			15	1.62942															11.5611	0.440729		2.79917	0.462006		0.571429	0.43769
				-0.993025	0.00584628		-0.993025	0			-0.993025	0.00506678		-0.993025	-0.0118874			15	1.46337			15	1.46337															11.6605	0.440729		2.81573	0.462006		0.608696	0.43769
				-0.993	0.0056514		-0.993	0.00194876			-0.993	0.0109131		-0.993	-0.0120823			15	1.37334			15	1.37334															11.6605	0.443769		2.81573	0.465046		0.608696	0.440729
				-0.992975	0.00428727		-0.992975	0			-0.992975	0.0101336		-0.992975	-0.0138362			15	1.33447			15	1.33447															11.6936	0.443769		2.86542	0.465046		0.621118	0.440729
				-0.99295	0.00097438		-0.99295	0.00272826			-0.99295	0.00721041		-0.99295	-0.0181235			15	1.30954			15	1.30954															11.6936	0.446809		2.86542	0.468085		0.621118	0.443769
				-0.992925	-0.00272826		-0.992925	0.00292314			-0.992925	0.0040924		-0.992925	-0.0109131			15	1.30751			15	1.30751															11.706	0.446809		2.87785	0.468085		0.662526	0.443769
				-0.9929	-0.000584628		-0.9929	-0.0040924			-0.9929	0.00194876		-0.9929	-0.00428727			15	1.11109			15	1.11109															11.706	0.449848		2.87785	0.471125		0.662526	0.446809
				-0.992875	-0.000584628		-0.992875	-0.0113028			-0.992875	0.00292314		-0.992875	-0.00155901			15	1.09419			15	1.09419															11.7433	0.449848		2.94824	0.471125		0.674948	0.446809
				-0.99285	-0.000584628		-0.99285	-0.00915917			-0.99285	0.00331289		-0.99285	-0.00331289			15	0.98704			15	0.98704															11.7433	0.452888		2.94824	0.474164		0.674948	0.449848
				-0.992825	-0.00155901		-0.992825	-0.00311802			-0.992825	0.0056514		-0.992825	-0.00389752			15	0.98049			15	0.98049															11.971	0.452888		2.96066	0.474164		0.695652	0.449848
				-0.9928	0		-0.9928	-0.0056514			-0.9928	0.00798992		-0.9928	-0.0128618			15	0.95319			15	0.95319															11.971	0.455927		2.96066	0.477204		0.695652	0.452888
				-0.992775	0.00194876		-0.992775	-0.00604116			-0.992775	0.00896429		-0.992775	-0.0148106			15	0.91789			15	0.91789															11.9917	0.455927		2.98137	0.477204		0.73706	0.452888
				-0.99275	0.000389752		-0.99275	-0.00331289			-0.99275	0.00643091		-0.99275	-0.0159798			15	0.90034			15	0.90034															11.9917	0.458967		2.98137	0.480243		0.73706	0.455927
				-0.992725	0.00136413		-0.992725	0.00350777			-0.992725	0.00350777		-0.992725	-0.00779504			15	0.866165			15	0.866165															12.0828	0.458967		3.04348	0.480243		0.761905	0.455927
				-0.9927	0.00896429		-0.9927	-0.00175388			-0.9927	-0.00116926		-0.9927	0.00292314			15	0.860715			15	0.860715															12.0828	0.462006		3.04348	0.483283		0.761905	0.458967
				-0.992675	0.0150055		-0.992675	-0.00292314			-0.992675	-0.00311802		-0.992675	0.00584628			15	0.859715			15	0.859715															12.1201	0.462006		3.05176	0.483283		0.766046	0.458967
				-0.99265	0.00818479		-0.99265	0.00136413			-0.99265	-0.00545653		-0.99265	0.00584628			15	0.822015			15	0.822015															12.1201	0.465046		3.05176	0.486322		0.766046	0.462006
				-0.992625	0.00214364		-0.992625	0.00467702			-0.992625	-0.00604116		-0.992625	0.00448215			15	0.808915			15	0.808915															12.1325	0.465046		3.06832	0.486322		0.770186	0.462006
				-0.9926	0.00097438		-0.9926	-0.00194876			-0.9926	-0.00798992		-0.9926	0.00584628			15	0.76514			15	0.76514															12.1325	0.468085		3.06832	0.489362		0.770186	0.465046
				-0.992575	0.000389752		-0.992575	-0.00857454			-0.992575	-0.00876942		-0.992575	0.00857454			15	0.758865			15	0.758865															12.1905	0.468085		3.10559	0.489362		0.782609	0.465046
				-0.99255	-0.00155901		-0.99255	-0.00331289			-0.99255	-0.0056514		-0.99255	0.0163696			15	0.70904			15	0.70904															12.1905	0.474164		3.10559	0.492401		0.782609	0.468085
				-0.992525	-0.00331289		-0.992525	0.00214364			-0.992525	0.000389752		-0.992525	0.0146157			15	0.691915			15	0.691915															12.3561	0.474164		3.12215	0.492401		0.786749	0.468085
				-0.9925	-0.00623603		-0.9925	-0.00194876			-0.9925	0.00526165		-0.9925	0.00643091			15	0.67134			15	0.67134															12.3561	0.480243		3.12215	0.495441		0.786749	0.471125
				-0.992475	-0.00798992		-0.992475	-0.00896429			-0.992475	0.00721041		-0.992475	0			15	0.62344			15	0.62344															12.3602	0.480243		3.13458	0.495441		0.795031	0.471125
				-0.99245	-0.00233851		-0.99245	-0.00662578			-0.99245	0.0097438		-0.99245	-0.00233851			15	0.611765			15	0.611765															12.3602	0.483283		3.13458	0.49848		0.795031	0.474164
				-0.992425	0.00350777		-0.992425	-0.000584628			-0.992425	0.00915917		-0.992425	0.00272826			15	0.57344			15	0.57344															12.3685	0.483283		3.15528	0.49848		0.832298	0.474164
				-0.9924	0.00331289		-0.9924	-0.00155901			-0.9924	0.00584628		-0.9924	0.00896429			15	0.55709			15	0.55709															12.3685	0.486322		3.15528	0.50152		0.832298	0.477204
				-0.992375	0.000779504		-0.992375	-0.00116926			-0.992375	0.00350777		-0.992375	0.00837967			15	0.554365			15	0.554365															12.3975	0.486322		3.23395	0.50152		0.84472	0.477204
				-0.99235	0.000584628		-0.99235	0.00116926			-0.99235	0.00350777		-0.99235	0.00311802			15	0.527065			15	0.527065															12.3975	0.489362		3.23395	0.507599		0.84472	0.480243
				-0.992325	-0.000389752		-0.992325	0.00428727			-0.992325	0.00292314		-0.992325	0.00175388			15	0.47709			15	0.47709															12.4555	0.489362		3.27536	0.507599		0.853002	0.480243
				-0.9923	-0.00272826		-0.9923	0.0048719			-0.9923	0.000194876		-0.9923	0.00272826			15	0.47519			15	0.47519															12.4555	0.492401		3.27536	0.510638		0.853002	0.483283
				-0.992275	-0.00331289		-0.992275	0.00370264			-0.992275	-0.00350777		-0.992275	0.0116926			15	0.42454			15	0.42454															12.4803	0.492401		3.2795	0.510638		0.956522	0.483283
				-0.99225	-0.00155901		-0.99225	0.00116926			-0.99225	-0.00175388		-0.99225	0.0167593			15	0.364265			15	0.364265															12.4803	0.495441		3.2795	0.513678		0.956522	0.486322
				-0.992225	-0.000194876		-0.992225	0.00097438			-0.992225	0.00506678		-0.992225	0.0177337			15	0.36209			15	0.36209															12.7039	0.495441		3.33333	0.513678		0.964803	0.486322
				-0.9922	-0.00272826		-0.9922	0.00253339			-0.9922	0.00876942		-0.9922	0.0179286			15	0.33924			15	0.33924															12.7039	0.49848		3.33333	0.516717		0.964803	0.489362
				-0.992175	-0.00662578		-0.992175	0.00428727			-0.992175	0.00915917		-0.992175	0.0194876			15	0.31774			15	0.31774															12.795	0.49848		3.34161	0.516717		1.00621	0.489362
				-0.99215	-0.00954892		-0.99215	0.00798992			-0.99215	0.00545653		-0.99215	0.0196825			15	0.31474			15	0.31474															12.795	0.50152		3.34161	0.519757		1.00621	0.492401
				-0.992125	-0.00993867		-0.992125	0.00993867			-0.992125	0.00292314		-0.992125	0.0153952			15	0.26354			15	0.26354															12.9275	0.50152		3.35404	0.519757		1.01863	0.492401
				-0.9921	-0.00428727		-0.9921	0.0103284			-0.9921	0.000779504		-0.9921	0.0144208			15	0.162515			15	0.162515															12.9275	0.504559		3.35404	0.522796		1.01863	0.495441
				-0.992075	0.00097438		-0.992075	0.00740529			-0.992075	0.00272826		-0.992075	0.0177337			15	0.125165			15	0.125165															12.9814	0.504559		3.39545	0.522796		1.02277	0.495441
				-0.99205	-0.00467702		-0.99205	0.00526165			-0.99205	0.0048719		-0.99205	0.0150055			15	0.116415			15	0.116415															12.9814	0.507599		3.39545	0.525836		1.02277	0.49848
				-0.992025	-0.00662578		-0.992025	-0.000584628			-0.992025	0.00428727		-0.992025	0.00467702			15	0.11289			15	0.11289															13.1097	0.507599		3.49896	0.525836		1.02692	0.49848
				-0.992	-0.00214364		-0.992	0.000779504			-0.992	0.00136413		-0.992	-0.00428727			15	0.06404			15	0.06404															13.1097	0.510638		3.49896	0.528875		1.02692	0.50152
				-0.991975	0.00311802		-0.991975	0.00214364			-0.991975	0.000389752		-0.991975	-0.00837967			15	0.00824			15	0.00824															13.1387	0.510638		3.5735	0.528875		1.04348	0.50152
				-0.99195	0.00350777		-0.99195	0.00506678			-0.99195	-0.00370264		-0.99195	-0.0118874			15	-0.010935			15	-0.010935															13.1387	0.513678		3.5735	0.531915		1.04348	0.504559
				-0.991925	0.00331289		-0.991925	0.0056514			-0.991925	-0.00467702		-0.991925	-0.0124721			15	-0.089085			15	-0.089085															13.1677	0.513678		3.65217	0.531915		1.06418	0.504559
				-0.9919	-0.000779504		-0.9919	-0.00214364			-0.9919	-0.0056514		-0.9919	-0.0159798			15	-0.38336			15	-0.38336															13.1677	0.516717		3.65217	0.534954		1.06418	0.507599
				-0.991875	0		-0.991875	-0.00857454			-0.991875	-0.00467702		-0.991875	-0.0187081			15	-0.39951			15	-0.39951															13.4783	0.516717		3.67288	0.534954		1.06832	0.507599
				-0.99185	0		-0.99185	-0.00662578			-0.99185	-0.0040924		-0.99185	-0.0208517			15	-0.44571			15	-0.44571															13.4783	0.519757		3.67288	0.537994		1.06832	0.510638
				-0.991825	-0.000584628		-0.991825	-0.00194876			-0.991825	-0.00428727		-0.991825	-0.0190978			15	-0.58336			15	-0.58336															13.5611	0.519757		3.69772	0.537994		1.07246	0.510638
				-0.9918	-0.0056514		-0.9918	-0.00428727			-0.9918	-0.00760016		-0.9918	-0.0159798			15	-0.586535			15	-0.586535															13.5611	0.522796		3.69772	0.541033		1.07246	0.516717
				-0.991775	-0.00798992		-0.991775	-0.00389752			-0.991775	-0.00993867		-0.991775	-0.0116926			15	-0.69011			15	-0.69011															13.5901	0.522796		3.73499	0.541033		1.0766	0.516717
				-0.99175	-0.00623603		-0.99175	-0.00116926			-0.99175	-0.0111079		-0.99175	-0.0124721			15	-0.74621			15	-0.74621															13.5901	0.525836		3.73499	0.544073		1.0766	0.519757
				-0.991725	-0.00292314		-0.991725	0.00467702			-0.991725	-0.0113028		-0.991725	-0.00545653			15	-0.79606			15	-0.79606															13.6232	0.525836		3.90476	0.544073		1.08489	0.519757
				-0.9917	-0.00214364		-0.9917	0.00389752			-0.9917	-0.0118874		-0.9917	0.00194876			15	-0.822035			15	-0.822035															13.6232	0.528875		3.90476	0.547112		1.08489	0.522796
				-0.991675	-0.000779504		-0.991675	0.00155901			-0.991675	-0.0111079		-0.991675	0.00506678			15	-0.999335			15	-0.999335															13.8261	0.528875		3.96273	0.547112		1.08903	0.522796
				-0.99165	-0.00175388		-0.99165	-0.00155901			-0.99165	-0.0109131		-0.99165	0.00331289			14	1.96994			14	1.96994															13.8261	0.531915		3.96273	0.550152		1.08903	0.525836
				-0.991625	-0.00526165		-0.991625	-0.00194876			-0.991625	-0.0114977		-0.991625	-0.00116926			14	1.96814			14	1.96814															13.8468	0.531915		3.96687	0.550152		1.12215	0.525836
				-0.9916	-0.00448215		-0.9916	0.00097438			-0.9916	-0.0113028		-0.9916	-0.00798992			14	1.83084			14	1.83084															13.8468	0.534954		3.96687	0.553191		1.12215	0.528875
				-0.991575	-0.00136413		-0.991575	0.00136413			-0.991575	-0.00448215		-0.991575	-0.00721041			14	1.68664			14	1.68664															13.9586	0.534954		4.07453	0.553191		1.147	0.528875
				-0.99155	0.00526165		-0.99155	0.000194876			-0.99155	-0.000389752		-0.99155	-0.00818479			14	1.53884			14	1.53884															13.9586	0.537994		4.07453	0.556231		1.147	0.531915
				-0.991525	0.00779504		-0.991525	-0.000779504			-0.991525	-0.00136413		-0.991525	-0.0130567			14	1.43864			14	1.43864															14.1118	0.537994		4.08696	0.556231		1.15114	0.531915
				-0.9915	-0.00233851		-0.9915	-0.000389752			-0.9915	-0.000194876		-0.9915	-0.0181235			14	1.38359			14	1.38359															14.1118	0.541033		4.08696	0.559271		1.15114	0.534954
				-0.991475	-0.0118874		-0.991475	-0.00136413			-0.991475	0.00272826		-0.991475	-0.0198773			14	1.37534			14	1.37534															14.5383	0.541033		4.19048	0.559271		1.17598	0.534954
				-0.99145	-0.0118874		-0.99145	-0.00292314			-0.99145	0.00331289		-0.99145	-0.018903			14	1.34994			14	1.34994															14.5383	0.544073		4.19048	0.56231		1.17598	0.537994
				-0.991425	-0.00798992		-0.991425	0.000194876			-0.991425	0.00233851		-0.991425	-0.0134464			14	1.32391			14	1.32391															14.5756	0.544073		4.2029	0.56231		1.25466	0.537994
				-0.9914	-0.00623603		-0.9914	0.000584628			-0.9914	-0.00370264		-0.9914	-0.0097438			14	1.29676			14	1.29676															14.5756	0.547112		4.2029	0.56535		1.25466	0.541033
				-0.991375	-0.000779504		-0.991375	-0.00097438			-0.991375	-0.00350777		-0.991375	-0.00701554			14	1.29322			14	1.29322															14.94	0.547112		4.36025	0.56535		1.28364	0.541033
				-0.99135	0.00311802		-0.99135	0.000584628			-0.99135	-0.000389752		-0.99135	-0.00876942			14	1.21309			14	1.21309															14.94	0.550152		4.36025	0.568389		1.28364	0.544073
				-0.991325	0.00350777		-0.991325	-0.00155901			-0.991325	-0.00272826		-0.991325	-0.00837967			14	1.21179			14	1.21179															15.1014	0.550152		4.47619	0.568389		1.29193	0.544073
				-0.9913	-0.000389752		-0.9913	-0.00136413			-0.9913	-0.00545653		-0.9913	-0.0105233			14	1.19894			14	1.19894															15.1014	0.553191		4.47619	0.571429		1.29193	0.547112
				-0.991275	-0.00194876		-0.991275	-0.00350777			-0.991275	-0.00545653		-0.991275	-0.00233851			14	1.11304			14	1.11304															15.1843	0.553191		4.53002	0.571429		1.31263	0.547112
				-0.99125	0.000194876		-0.99125	-0.00272826			-0.99125	-0.00331289		-0.99125	0.00623603			14	0.99909			14	0.99909															15.1843	0.556231		4.53002	0.574468		1.31263	0.550152
				-0.991225	0.00116926		-0.991225	-0.00194876			-0.991225	0.00116926		-0.991225	0.0128618			14	0.96099			14	0.96099															15.7847	0.556231		4.56729	0.574468		1.33747	0.550152
				-0.9912	-0.00448215		-0.9912	0.00116926			-0.9912	0.0048719		-0.9912	0.0165645			14	0.913065			14	0.913065															15.7847	0.559271		4.56729	0.580547		1.33747	0.553191
				-0.991175	-0.00935405		-0.991175	0.00097438			-0.991175	0.0056514		-0.991175	0.0165645			14	0.83194			14	0.83194															15.9089	0.559271		4.60455	0.580547		1.34576	0.553191
				-0.99115	-0.00448215		-0.99115	0.00272826			-0.99115	0.00526165		-0.99115	0.0118874			14	0.81639			14	0.81639															15.9089	0.56231		4.60455	0.583587		1.34576	0.556231
				-0.991125	0.00272826		-0.991125	0.00350777			-0.991125	0.00233851		-0.991125	0.0146157			14	0.757765			14	0.757765															16.0207	0.56231		4.7619	0.583587		1.35818	0.556231
				-0.9911	0.00506678		-0.9911	0.000779504			-0.9911	0.00155901		-0.9911	0.0177337			14	0.72229			14	0.72229															16.0207	0.56535		4.7619	0.586626		1.35818	0.56231
				-0.991075	0.00623603		-0.991075	-0.00292314			-0.991075	0.00467702		-0.991075	0.0175388			14	0.71099			14	0.71099															16.8489	0.56535		4.84886	0.586626		1.38716	0.56231
				-0.99105	0.00701554		-0.99105	0.0040924			-0.99105	0.00857454		-0.99105	0.0134464			14	0.66524			14	0.66524															16.8489	0.568389		4.84886	0.589666		1.38716	0.56535
				-0.991025	0.00428727		-0.991025	0.00545653			-0.991025	0.00798992		-0.991025	0.0048719			14	0.661415			14	0.661415															16.8986	0.568389		4.95238	0.589666		1.44513	0.56535
				-0.991	-0.00292314		-0.991	-0.00116926			-0.991	0.00643091		-0.991	-0.000584628			14	0.620415			14	0.620415															16.8986	0.571429		4.95238	0.592705		1.44513	0.568389
				-0.990975	-0.00837967		-0.990975	-0.00915917			-0.990975	0.00448215		-0.990975	0.00155901			14	0.605815			14	0.605815															16.9482	0.571429		4.97723	0.592705		1.53209	0.568389
				-0.99095	-0.00623603		-0.99095	-0.0101336			-0.99095	0.00175388		-0.99095	0.00272826			14	0.57524			14	0.57524															16.9482	0.574468		4.97723	0.595745		1.53209	0.571429
				-0.990925	0.00097438		-0.990925	-0.00545653			-0.990925	0.00136413		-0.990925	0.0048719			14	0.49299			14	0.49299															17.0766	0.574468		5.04348	0.595745		1.53623	0.571429
				-0.9909	0.00331289		-0.9909	-0.00253339			-0.9909	0.00136413		-0.9909	0.0048719			14	0.46394			14	0.46394															17.0766	0.577508		5.04348	0.598784		1.53623	0.574468
				-0.990875	0.00604116		-0.990875	-0.00175388			-0.990875	0		-0.990875	0.00136413			14	0.45794			14	0.45794															17.9006	0.577508		5.13872	0.598784		1.56936	0.574468
				-0.99085	0.00760016		-0.99085	-0.00292314			-0.99085	-0.000389752		-0.99085	0.00350777			14	0.447265			14	0.447265															17.9006	0.580547		5.13872	0.601824		1.56936	0.580547
				-0.990825	0.00818479		-0.990825	-0.00428727			-0.990825	0.00331289		-0.990825	0.0136413			14	0.32779			14	0.32779															18.0414	0.580547		5.2381	0.601824		1.5735	0.580547
				-0.9908	0.00350777		-0.9908	-0.000389752			-0.9908	0.00428727		-0.9908	0.0237749			14	0.316065			14	0.316065															18.0414	0.583587		5.2381	0.604863		1.5735	0.583587
				-0.990775	-0.00136413		-0.990775	0.00175388			-0.990775	0.00253339		-0.990775	0.0268929			14	0.305865			14	0.305865															18.0621	0.583587		5.25052	0.604863		1.57764	0.583587
				-0.99075	-0.000389752		-0.99075	0.00175388			-0.99075	0.00233851		-0.99075	0.020462			14	0.29534			14	0.29534															18.0621	0.586626		5.25052	0.607903		1.57764	0.586626
				-0.990725	0.00662578		-0.990725	0.00292314			-0.990725	0.00915917		-0.990725	0.0130567			14	0.267665			14	0.267665															18.3644	0.586626		5.2795	0.607903		1.5942	0.586626
				-0.9907	0.0113028		-0.9907	0.00428727			-0.9907	0.0132516		-0.9907	0.00292314			14	0.25604			14	0.25604															18.3644	0.589666		5.2795	0.610942		1.5942	0.589666
				-0.990675	0.0120823		-0.990675	0.00233851			-0.990675	0.0122772		-0.990675	0.000584628			14	0.20694			14	0.20694															19.1553	0.589666		5.28778	0.610942		1.63147	0.589666
				-0.99065	0.00721041		-0.99065	0			-0.99065	0.00837967		-0.99065	0.00116926			14	0.156665			14	0.156665															19.1553	0.592705		5.28778	0.613982		1.63147	0.592705
				-0.990625	0.00097438		-0.990625	-0.00214364			-0.990625	0.00116926		-0.990625	0.00253339			14	0.15474			14	0.15474															19.4783	0.592705		5.56936	0.613982		1.71014	0.592705
				-0.9906	0		-0.9906	-0.00155901			-0.9906	-0.00643091		-0.9906	0.00136413			14	0.13274			14	0.13274															19.4783	0.595745		5.56936	0.617021		1.71014	0.595745
				-0.990575	0.00155901		-0.990575	-0.00155901			-0.990575	-0.00448215		-0.990575	-0.00837967			14	0.114965			14	0.114965															20.0911	0.595745		5.60248	0.617021		1.71429	0.595745
				-0.99055	0.00272826		-0.99055	0.00116926			-0.99055	0.00097438		-0.99055	-0.0214364			14	0.10369			14	0.10369															20.0911	0.598784		5.60248	0.620061		1.71429	0.598784
				-0.990525	0.00331289		-0.990525	0.000194876			-0.990525	0.00662578		-0.990525	-0.0214364			14	0.10214			14	0.10214															20.1532	0.598784		5.65217	0.620061		1.75983	0.598784
				-0.9905	-0.00292314		-0.9905	-0.00253339			-0.9905	0.00760016		-0.9905	-0.0200722			14	0.065665			14	0.065665															20.1532	0.601824		5.65217	0.6231		1.75983	0.601824
				-0.990475	-0.00701554		-0.990475	-0.00857454			-0.990475	0.00370264		-0.990475	-0.0140311			14	0.063365			14	0.063365															20.3023	0.601824		5.75569	0.6231		1.7764	0.601824
				-0.99045	-0.00467702		-0.99045	-0.00818479			-0.99045	-0.00233851		-0.99045	-0.00662578			14	0.05289			14	0.05289															20.3023	0.604863		5.75569	0.62614		1.7764	0.604863
				-0.990425	-0.000779504		-0.990425	-0.00779504			-0.990425	-0.00662578		-0.990425	-0.000194876			14	0.02039			14	0.02039															20.8282	0.604863		5.7971	0.62614		1.7971	0.604863
				-0.9904	0.000389752		-0.9904	-0.00292314			-0.9904	-0.0118874		-0.9904	0.00136413			14	0.01684			14	0.01684															20.8282	0.607903		5.7971	0.629179		1.7971	0.607903
				-0.990375	0.000194876		-0.990375	0.00389752			-0.990375	-0.0103284		-0.990375	-0.00448215			14	0.008565			14	0.008565															20.9896	0.607903		5.86749	0.629179		1.82609	0.607903
				-0.99035	-0.00214364		-0.99035	0.00526165			-0.99035	-0.00682066		-0.99035	-0.0120823			14	-0.041185			14	-0.041185															20.9896	0.610942		5.86749	0.632219		1.82609	0.610942
				-0.990325	-0.00272826		-0.990325	0.00097438			-0.990325	-0.0040924		-0.990325	-0.0150055			14	-0.070535			14	-0.070535															21.0104	0.610942		6.10352	0.632219		1.83437	0.610942
				-0.9903	-0.00136413		-0.9903	-0.0040924			-0.9903	-0.00331289		-0.9903	-0.00935405			14	-0.09296			14	-0.09296															21.0104	0.613982		6.10352	0.635258		1.83437	0.613982
				-0.990275	-0.00311802		-0.990275	-0.00545653			-0.990275	-0.00448215		-0.990275	-0.00116926			14	-0.15781			14	-0.15781															21.3499	0.613982		6.16977	0.635258		1.86335	0.613982
				-0.99025	-0.00682066		-0.99025	-0.000584628			-0.99025	-0.00175388		-0.99025	0.00740529			14	-0.35781			14	-0.35781															21.3499	0.617021		6.16977	0.638298		1.86335	0.617021
				-0.990225	-0.00857454		-0.990225	0.00506678			-0.990225	0.00331289		-0.990225	0.0040924			14	-0.37066			14	-0.37066															21.4037	0.617021		6.23602	0.638298		1.93375	0.617021
				-0.9902	-0.00370264		-0.9902	0.00428727			-0.9902	0.0056514		-0.9902	0.00331289			14	-0.40141			14	-0.40141															21.4037	0.620061		6.23602	0.641337		1.93375	0.620061
				-0.990175	0.00272826		-0.990175	0.00350777			-0.990175	0.00097438		-0.990175	0.0159798			14	-0.59851			14	-0.59851															22.0828	0.620061		6.26501	0.641337		1.97101	0.620061
				-0.99015	0.00311802		-0.99015	0.00350777			-0.99015	-0.00155901		-0.99015	0.0280621			14	-0.70726			14	-0.70726															22.0828	0.6231		6.26501	0.644377		1.97101	0.6231
				-0.990125	0.00292314		-0.990125	0.00545653			-0.990125	-0.00253339		-0.990125	0.0233851			14	-0.81806			14	-0.81806															22.2277	0.6231		6.28157	0.644377		1.99172	0.6231
				-0.9901	0.00194876		-0.9901	0.00253339			-0.9901	-0.0056514		-0.9901	0.0169542			14	-0.90741			14	-0.90741															22.2277	0.62614		6.28157	0.647416		1.99172	0.62614
				-0.990075	-0.000389752		-0.990075	0.00097438			-0.990075	-0.00682066		-0.990075	0.0114977			14	-0.91701			14	-0.91701															22.501	0.62614		6.56729	0.647416		2.01656	0.62614
				-0.99005	-0.00311802		-0.99005	0.00136413			-0.99005	-0.00915917		-0.99005	0.00448215			14	-0.92616			14	-0.92616															22.501	0.629179		6.56729	0.650456		2.01656	0.632219
				-0.990025	-0.00604116		-0.990025	0.0048719			-0.990025	-0.00896429		-0.990025	0.00214364			14	-0.96411			14	-0.96411															23.0683	0.629179		6.63768	0.650456		2.12422	0.632219
				-0.99	-0.00623603		-0.99	0.00272826			-0.99	-0.0048719		-0.99	-0.00389752			13	1.84009			13	1.84009															23.0683	0.632219		6.63768	0.653495		2.12422	0.635258
				-0.989975	-0.00350777		-0.989975	0.00311802			-0.989975	0		-0.989975	-0.0105233			13	1.83591			13	1.83591															23.1843	0.632219		6.78261	0.653495		2.14079	0.635258
				-0.98995	-0.00136413		-0.98995	0.00526165			-0.98995	0.00623603		-0.98995	-0.0109131			13	1.74419			13	1.74419															23.1843	0.635258		6.78261	0.656535		2.14079	0.638298
				-0.989925	-0.000194876		-0.989925	0.00604116			-0.989925	0.00623603		-0.989925	-0.0040924			13	1.71494			13	1.71494															23.2754	0.635258		6.88199	0.656535		2.20704	0.638298
				-0.9899	-0.00253339		-0.9899	0.00779504			-0.9899	0.00526165		-0.9899	0			13	1.66309			13	1.66309															23.2754	0.638298		6.88199	0.659574		2.20704	0.641337
				-0.989875	-0.0040924		-0.989875	0.00545653			-0.989875	0.00214364		-0.989875	-0.00604116			13	1.59874			13	1.59874															23.2919	0.638298		6.98965	0.659574		2.294	0.641337
				-0.98985	-0.00311802		-0.98985	0.00467702			-0.98985	0.00097438		-0.98985	-0.0152003			13	1.58947			13	1.58947															23.2919	0.641337		6.98965	0.662614		2.294	0.644377
				-0.989825	-0.00272826		-0.989825	-0.00175388			-0.989825	0.000584628		-0.989825	-0.0105233			13	1.58054			13	1.58054															24.0207	0.641337		7.21739	0.662614		2.36439	0.644377
				-0.9898	-0.00448215		-0.9898	-0.00253339			-0.9898	-0.00097438		-0.9898	-0.00584628			13	1.52084			13	1.52084															24.0207	0.644377		7.21739	0.668693		2.36439	0.647416
				-0.989775	-0.00526165		-0.989775	-0.00370264			-0.989775	-0.000779504		-0.989775	-0.00233851			13	1.49597			13	1.49597															24.087	0.644377		7.25466	0.668693		2.40994	0.647416
				-0.98975	-0.00448215		-0.98975	-0.00194876			-0.98975	-0.00389752		-0.98975	0			13	1.35884			13	1.35884															24.087	0.647416		7.25466	0.671733		2.40994	0.650456
				-0.989725	-0.00194876		-0.989725	0.00097438			-0.989725	0.00155901		-0.989725	-0.00253339			13	1.29324			13	1.29324															24.4182	0.647416		7.38302	0.671733		2.49275	0.650456
				-0.9897	-0.00350777		-0.9897	0.00136413			-0.9897	-0.00097438		-0.9897	-0.00370264			13	1.25874			13	1.25874															24.4182	0.650456		7.38302	0.674772		2.49275	0.653495
				-0.989675	-0.00506678		-0.989675	-0.000584628			-0.989675	-0.00545653		-0.989675	-0.00116926			13	1.21549			13	1.21549															24.472	0.650456		7.47412	0.674772		2.50104	0.653495
				-0.98965	-0.00311802		-0.98965	-0.00389752			-0.98965	-0.0103284		-0.98965	-0.00097438			13	1.20652			13	1.20652															24.472	0.653495		7.47412	0.677812		2.50104	0.656535
				-0.989625	-0.00175388		-0.989625	-0.00526165			-0.989625	-0.00701554		-0.989625	0.00253339			13	1.15287			13	1.15287															24.4886	0.653495		7.4824	0.677812		2.53002	0.656535
				-0.9896	-0.00350777		-0.9896	-0.00370264			-0.9896	-0.00116926		-0.9896	0.00701554			13	1.06617			13	1.06617															24.4886	0.659574		7.4824	0.680851		2.53002	0.659574
				-0.989575	-0.00253339		-0.989575	-0.000584628			-0.989575	0.00506678		-0.989575	0.00818479			13	0.94924			13	0.94924															24.6667	0.659574		7.6853	0.680851		2.5383	0.659574
				-0.98955	0		-0.98955	-0.00214364			-0.98955	0.00701554		-0.98955	0.0116926			13	0.91714			13	0.91714															24.6667	0.662614		7.6853	0.683891		2.5383	0.662614
				-0.989525	0.00292314		-0.989525	-0.00467702			-0.989525	0.000389752		-0.989525	0.0113028			13	0.872715			13	0.872715															24.6708	0.662614		7.74741	0.683891		2.55072	0.662614
				-0.9895	0.000779504		-0.9895	-0.00389752			-0.9895	-0.00604116		-0.9895	0.00701554			13	0.85109			13	0.85109															24.6708	0.665653		7.74741	0.68693		2.55072	0.665653
				-0.989475	0.00584628		-0.989475	-0.00136413			-0.989475	-0.00311802		-0.989475	0.00311802			13	0.809065			13	0.809065															24.9524	0.665653		7.81781	0.68693		2.62526	0.665653
				-0.98945	0.0128618		-0.98945	0.00175388			-0.98945	0.00155901		-0.98945	-0.00292314			13	0.67154			13	0.67154															24.9524	0.668693		7.81781	0.68997		2.62526	0.668693
				-0.989425	0.0128618		-0.989425	0.0048719			-0.989425	0.00584628		-0.989425	-0.00311802			13	0.62444			13	0.62444															25.0269	0.668693		7.95859	0.68997		2.67495	0.668693
				-0.9894	0.00194876		-0.9894	0.00545653			-0.9894	0.0056514		-0.9894	-0.00136413			13	0.60374			13	0.60374															25.0269	0.671733		7.95859	0.693009		2.67495	0.671733
				-0.989375	-0.0056514		-0.989375	0.00643091			-0.989375	-0.00116926		-0.989375	0.00116926			13	0.59994			13	0.59994															25.2961	0.671733		7.99172	0.693009		2.71222	0.671733
				-0.98935	0.00097438		-0.98935	0.00448215			-0.98935	-0.0105233		-0.98935	0.00428727			13	0.57254			13	0.57254															25.2961	0.674772		7.99172	0.696049		2.71222	0.674772
				-0.989325	0.0097438		-0.989325	0.000779504			-0.989325	-0.00818479		-0.989325	0.00253339			13	0.56844			13	0.56844															25.5321	0.674772		8.27329	0.696049		2.74948	0.674772
				-0.9893	0.0056514		-0.9893	-0.00214364			-0.9893	-0.00389752		-0.9893	-0.00097438			13	0.566915			13	0.566915															25.5321	0.677812		8.27329	0.699088		2.74948	0.677812
				-0.989275	0.000779504		-0.989275	-0.00682066			-0.989275	-0.00526165		-0.989275	-0.00876942			13	0.55139			13	0.55139															26.3395	0.677812		9.2381	0.699088		2.95652	0.677812
				-0.98925	0.00136413		-0.98925	-0.0056514			-0.98925	0.000584628		-0.98925	-0.00935405			13	0.51634			13	0.51634															26.3395	0.680851		9.2381	0.702128		2.95652	0.680851
				-0.989225	0.00467702		-0.989225	-0.00467702			-0.989225	0.00448215		-0.989225	-0.00292314			13	0.50714			13	0.50714															26.381	0.680851		9.36232	0.702128		2.98137	0.680851
				-0.9892	0.00155901		-0.9892	-0.00311802			-0.9892	0.00798992		-0.9892	0.00155901			13	0.463065			13	0.463065															26.381	0.683891		9.36232	0.705167		2.98137	0.683891
				-0.989175	-0.000194876		-0.989175	0.00428727			-0.989175	0.0109131		-0.989175	-0.00643091			13	0.41784			13	0.41784															26.5176	0.683891		9.71014	0.705167		2.98965	0.683891
				-0.98915	0.000584628		-0.98915	0.00331289			-0.98915	0.0152003		-0.98915	-0.0116926			13	0.407515			13	0.407515															26.5176	0.68693		9.71014	0.708207		2.98965	0.68693
				-0.989125	0.000779504		-0.989125	0.00253339			-0.989125	0.0208517		-0.989125	-0.0103284			13	0.378415			13	0.378415															26.7867	0.68693		10.0124	0.708207		2.99379	0.68693
				-0.9891	-0.00175388		-0.9891	-0.000584628			-0.9891	0.0212415		-0.9891	-0.0109131			13	0.366165			13	0.366165															26.7867	0.68997		10.0124	0.711246		2.99379	0.68997
				-0.989075	-0.00506678		-0.989075	-0.00233851			-0.989075	0.0138362		-0.989075	-0.00682066			13	0.33609			13	0.33609															26.8323	0.68997		10.4886	0.711246		3.0559	0.68997
				-0.98905	-0.00331289		-0.98905	-0.00370264			-0.98905	0.00896429		-0.98905	0.00292314			13	0.307315			13	0.307315															26.8323	0.693009		10.4886	0.714286		3.0559	0.693009
				-0.989025	0.00116926		-0.989025	-0.00370264			-0.989025	0.0105233		-0.989025	0.00798992			13	0.265815			13	0.265815															26.9524	0.693009		10.5217	0.714286		3.147	0.693009
				-0.989	0.00097438		-0.989	-0.00175388			-0.989	0.0120823		-0.989	0.00837967			13	0.26274			13	0.26274															26.9524	0.696049		10.5217	0.717325		3.147	0.696049
				-0.988975	0.00194876		-0.988975	0.00194876			-0.988975	0.00857454		-0.988975	0.00760016			13	0.25474			13	0.25474															27.118	0.696049		10.617	0.717325		3.22981	0.696049
				-0.98895	-0.00097438		-0.98895	0.00233851			-0.98895	-0.00272826		-0.98895	0.00701554			13	0.23449			13	0.23449															27.118	0.699088		10.617	0.720365		3.22981	0.699088
				-0.988925	-0.00331289		-0.988925	0.00097438			-0.988925	-0.0109131		-0.988925	0.00993867			13	0.22659			13	0.22659															27.412	0.699088		12.1284	0.720365		3.25466	0.699088
				-0.9889	-0.0040924		-0.9889	0.00233851			-0.9889	-0.020462		-0.9889	0.00682066			13	0.21704			13	0.21704															27.412	0.702128		12.1284	0.723404		3.25466	0.702128
				-0.988875	-0.00097438		-0.988875	0.00292314			-0.988875	-0.0247492		-0.988875	-0.000389752			13	0.163365			13	0.163365															27.8592	0.702128		12.1325	0.723404		3.31263	0.702128
				-0.98885	0.00175388		-0.98885	-0.00097438			-0.98885	-0.0210466		-0.98885	-0.0114977			13	0.15399			13	0.15399															27.8592	0.705167		12.1325	0.726444		3.31263	0.705167
				-0.988825	0.00779504		-0.988825	-0.00253339			-0.988825	-0.0155901		-0.988825	-0.0163696			13	0.145865			13	0.145865															27.9296	0.705167		12.2981	0.726444		3.44513	0.705167
				-0.9888	0.00662578		-0.9888	0.00175388			-0.9888	-0.0056514		-0.9888	-0.017344			13	0.117815			13	0.117815															27.9296	0.708207		12.2981	0.729483		3.44513	0.708207
				-0.988775	0.00584628		-0.988775	0.00779504			-0.988775	-0.00292314		-0.988775	-0.0107182			13	0.116315			13	0.116315															29.2588	0.708207		12.6253	0.729483		3.49068	0.708207
				-0.98875	0.00175388		-0.98875	0.00350777			-0.98875	0.00097438		-0.98875	-0.00701554			13	0.06389			13	0.06389															29.2588	0.711246		12.6253	0.732523		3.49068	0.711246
				-0.988725	-0.000389752		-0.988725	-0.00331289			-0.988725	0.00155901		-0.988725	-0.00584628			13	0.06244			13	0.06244															29.8758	0.711246		12.7743	0.732523		3.52795	0.711246
				-0.9887	0.000779504		-0.9887	-0.00136413			-0.9887	-0.000779504		-0.9887	-0.00233851			13	0.03534			13	0.03534															29.8758	0.714286		12.7743	0.735562		3.52795	0.714286
				-0.988675	0.00233851		-0.988675	0.000389752			-0.988675	-0.00155901		-0.988675	0.000194876			13	0.027015			13	0.027015															30.087	0.714286		13.2008	0.735562		3.61077	0.714286
				-0.98865	-0.000389752		-0.98865	0			-0.98865	-0.00233851		-0.98865	0.00350777			13	0.02284			13	0.02284															30.087	0.717325		13.2008	0.738602		3.61077	0.717325
				-0.988625	-0.00214364		-0.988625	-0.00233851			-0.988625	0.00253339		-0.988625	0.00253339			13	-0.15431			13	-0.15431															30.2692	0.717325		13.7516	0.738602		3.66046	0.717325
				-0.9886	0.00253339		-0.9886	0.00292314			-0.9886	0.0040924		-0.9886	-0.000194876			13	-0.18551			13	-0.18551															30.2692	0.720365		13.7516	0.741641		3.66046	0.720365
				-0.988575	0.00526165		-0.988575	0.00740529			-0.988575	0.00350777		-0.988575	-0.00097438			13	-0.34486			13	-0.34486															30.6957	0.720365		14.4928	0.741641		3.69358	0.720365
				-0.98855	0.00136413		-0.98855	0.00116926			-0.98855	-0.00311802		-0.98855	-0.000194876			13	-0.365085			13	-0.365085															30.6957	0.723404		14.4928	0.744681		3.69358	0.723404
				-0.988525	0.00331289		-0.988525	-0.00643091			-0.988525	-0.00798992		-0.988525	-0.000389752			13	-0.62441			13	-0.62441															30.8447	0.723404		14.911	0.744681		3.74327	0.723404
				-0.9885	0.00526165		-0.9885	-0.000779504			-0.9885	-0.00896429		-0.9885	-0.000779504			13	-0.934585			13	-0.934585															30.8447	0.726444		14.911	0.74772		3.74327	0.726444
				-0.988475	0.00876942		-0.988475	0.00662578			-0.988475	-0.00155901		-0.988475	-0.00292314			12	1.90029			12	1.90029															31.6977	0.726444		14.9524	0.74772		3.74741	0.726444
				-0.98845	0.00506678		-0.98845	0.00253339			-0.98845	0.000389752		-0.98845	-0.000389752			12	1.89129			12	1.89129															31.6977	0.729483		14.9524	0.75076		3.74741	0.729483
				-0.988425	0.00467702		-0.988425	-0.000389752			-0.988425	-0.0056514		-0.988425	0.00545653			12	1.85896			12	1.85896															31.7267	0.729483		15.9793	0.75076		3.75983	0.729483
				-0.9884	0.00545653		-0.9884	0.00136413			-0.9884	-0.0120823		-0.9884	0.0124721			12	1.64259			12	1.64259															31.7267	0.732523		15.9793	0.753799		3.75983	0.732523
				-0.988375	0.00545653		-0.988375	0.00370264			-0.988375	-0.00448215		-0.988375	0.0097438			12	1.60597			12	1.60597															31.7598	0.732523		16.0166	0.753799		3.80538	0.732523
				-0.98835	0.000194876		-0.98835	-0.00253339			-0.98835	0.00253339		-0.98835	0.0109131			12	1.59204			12	1.59204															31.7598	0.735562		16.0166	0.756839		3.80538	0.735562
				-0.988325	-0.0122772		-0.988325	-0.00837967			-0.988325	0.00214364		-0.988325	0.00604116			12	1.39169			12	1.39169															31.8841	0.735562		16.2857	0.756839		3.87992	0.735562
				-0.9883	-0.0245544		-0.9883	-0.00643091			-0.9883	0.00253339		-0.9883	-0.000194876			12	1.38904			12	1.38904															31.8841	0.738602		16.2857	0.759878		3.87992	0.738602
				-0.988275	-0.0362469		-0.988275	0.000389752			-0.988275	0.00428727		-0.988275	-0.00116926			12	1.38267			12	1.38267															32.0331	0.738602		17.7184	0.759878		3.89648	0.738602
				-0.98825	-0.0261134		-0.98825	0.00155901			-0.98825	0.00526165		-0.98825	-0.0048719			12	1.26004			12	1.26004															32.0331	0.741641		17.7184	0.762918		3.89648	0.741641
				-0.988225	-0.0109131		-0.988225	0.00350777			-0.988225	0.00506678		-0.988225	-0.000779504			12	1.09989			12	1.09989															32.0455	0.741641		19.1718	0.762918		3.91718	0.741641
				-0.9882	-0.00350777		-0.9882	0.00798992			-0.9882	0.00389752		-0.9882	0.00097438			12	1.04304			12	1.04304															32.0455	0.744681		19.1718	0.765957		3.91718	0.744681
				-0.988175	0.00233851		-0.988175	0.00623603			-0.988175	0.00233851		-0.988175	0.00155901			12	0.96669			12	0.96669															32.8323	0.744681		19.2919	0.765957		3.99172	0.744681
				-0.98815	0.00506678		-0.98815	-0.00350777			-0.98815	0.000584628		-0.98815	0.00311802			12	0.92439			12	0.92439															32.8323	0.74772		19.2919	0.768997		3.99172	0.74772
				-0.988125	0.00857454		-0.988125	-0.0138362			-0.988125	0.000779504		-0.988125	0.000389752			12	0.916665			12	0.916665															33.3416	0.74772		19.7805	0.768997		4.05797	0.74772
				-0.9881	0.00837967		-0.9881	-0.00760016			-0.9881	-0.00155901		-0.9881	0.00272826			12	0.89424			12	0.89424															33.3416	0.75076		19.7805	0.772036		4.05797	0.75076
				-0.988075	0.00721041		-0.988075	-0.000779504			-0.988075	-0.00233851		-0.988075	0.00701554			12	0.87214			12	0.87214															33.6025	0.75076		19.8716	0.772036		4.13251	0.75076
				-0.98805	0.0116926		-0.98805	-0.00389752			-0.98805	-0.000779504		-0.98805	0.00721041			12	0.836515			12	0.836515															33.6025	0.753799		19.8716	0.775076		4.13251	0.753799
				-0.988025	0.0159798		-0.988025	-0.00876942			-0.988025	0.00389752		-0.988025	-0.000389752			12	0.82239			12	0.82239															34.0166	0.753799		20.5756	0.775076		4.14907	0.753799
				-0.988	0.0114977		-0.988	-0.000584628			-0.988	0.00954892		-0.988	-0.00116926			12	0.81559			12	0.81559															34.0166	0.756839		20.5756	0.778116		4.14907	0.756839
				-0.987975	0.00448215		-0.987975	0.00604116			-0.987975	0.0109131		-0.987975	-0.00155901			12	0.813615			12	0.813615															34.0497	0.756839		20.7495	0.778116		4.19876	0.756839
				-0.98795	0.000389752		-0.98795	0.00584628			-0.98795	0.0122772		-0.98795	0.00292314			12	0.758115			12	0.758115															34.0497	0.759878		20.7495	0.781155		4.19876	0.759878
				-0.987925	0		-0.987925	0.00175388			-0.987925	0.00954892		-0.987925	0.00350777			12	0.66669			12	0.66669															34.3561	0.759878		21.0932	0.781155		4.29814	0.759878
				-0.9879	0.00233851		-0.9879	0.00779504			-0.9879	0.00331289		-0.9879	0.00389752			12	0.622565			12	0.622565															34.3561	0.762918		21.0932	0.784195		4.29814	0.765957
				-0.987875	0.00428727		-0.987875	0.00915917			-0.987875	-0.000194876		-0.987875	0.00253339			12	0.60824			12	0.60824															34.588	0.762918		21.1387	0.784195		4.4265	0.765957
				-0.98785	0.00467702		-0.98785	0.00896429			-0.98785	-0.00584628		-0.98785	0.000194876			12	0.571115			12	0.571115															34.588	0.765957		21.1387	0.787234		4.4265	0.768997
				-0.987825	0.00643091		-0.987825	0			-0.987825	-0.00662578		-0.987825	-0.00448215			12	0.56104			12	0.56104															34.7702	0.765957		21.2919	0.787234		4.48861	0.768997
				-0.9878	0.00545653		-0.9878	-0.00136413			-0.9878	-0.0040924		-0.9878	-0.00954892			12	0.55624			12	0.55624															34.7702	0.768997		21.2919	0.790274		4.48861	0.772036
				-0.987775	0.00389752		-0.987775	-0.00545653			-0.987775	0.00214364		-0.987775	-0.00701554			12	0.52694			12	0.52694															34.8737	0.768997		21.3333	0.790274		4.53416	0.772036
				-0.98775	0.00350777		-0.98775	-0.00604116			-0.98775	0.00389752		-0.98775	-0.00662578			12	0.51834			12	0.51834															34.8737	0.772036		21.3333	0.793313		4.53416	0.775076
				-0.987725	0.00545653		-0.987725	-0.00545653			-0.987725	-0.00136413		-0.987725	-0.00740529			12	0.51664			12	0.51664															34.9896	0.772036		21.7391	0.793313		4.60041	0.775076
				-0.9877	0.00682066		-0.9877	0.00097438			-0.9877	-0.00740529		-0.9877	-0.00876942			12	0.51374			12	0.51374															34.9896	0.775076		21.7391	0.796353		4.60041	0.778116
				-0.987675	0.00818479		-0.987675	0.00896429			-0.987675	-0.00584628		-0.987675	-0.00662578			12	0.511165			12	0.511165															35.3499	0.775076		22.4472	0.796353		4.61698	0.778116
				-0.98765	0.00233851		-0.98765	0.00857454			-0.98765	-0.000584628		-0.98765	0.00155901			12	0.415415			12	0.415415															35.3499	0.778116		22.4472	0.799392		4.61698	0.781155
				-0.987625	0		-0.987625	0.00837967			-0.987625	-0.00214364		-0.987625	0.00545653			12	0.36059			12	0.36059															35.4824	0.778116		22.6004	0.799392		4.63354	0.781155
				-0.9876	0.00175388		-0.9876	0.00896429			-0.9876	-0.000194876		-0.9876	0.00545653			12	0.26604			12	0.26604															35.4824	0.781155		22.6004	0.802432		4.63354	0.784195
				-0.987575	0.00370264		-0.987575	0.00993867			-0.987575	0.00350777		-0.987575	0			12	0.20494			12	0.20494															36.4224	0.781155		22.7081	0.802432		4.67081	0.784195
				-0.98755	-0.000779504		-0.98755	0.00448215			-0.98755	0.00448215		-0.98755	-0.00214364			12	0.16644			12	0.16644															36.4224	0.784195		22.7081	0.805471		4.67081	0.787234
				-0.987525	-0.00545653		-0.987525	-0.00175388			-0.987525	-0.000389752		-0.987525	-0.000194876			12	0.162715			12	0.162715															36.7453	0.784195		22.8613	0.805471		4.69565	0.787234
				-0.9875	-0.00467702		-0.9875	-0.000584628			-0.9875	-0.00467702		-0.9875	0.00370264			12	0.118765			12	0.118765															36.7453	0.787234		22.8613	0.808511		4.69565	0.790274
				-0.987475	-0.000194876		-0.987475	0.00136413			-0.987475	-0.00292314		-0.987475	0			12	0.11729			12	0.11729															36.766	0.787234		23.1139	0.808511		4.84058	0.790274
				-0.98745	-0.00272826		-0.98745	0.00253339			-0.98745	-0.00331289		-0.98745	-0.00701554			12	0.11584			12	0.11584															36.766	0.790274		23.1139	0.81155		4.84058	0.793313
				-0.987425	-0.00253339		-0.987425	-0.00097438			-0.987425	-0.00545653		-0.987425	-0.00837967			12	0.11249			12	0.11249															37.5445	0.790274		23.3913	0.81155		4.86128	0.793313
				-0.9874	-0.000194876		-0.9874	-0.00545653			-0.9874	-0.0111079		-0.9874	-0.00506678			12	0.08574			12	0.08574															37.5445	0.793313		23.3913	0.81459		4.86128	0.796353
				-0.987375	0.00370264		-0.987375	-0.0101336			-0.987375	-0.0111079		-0.987375	0.000389752			12	0.05849			12	0.05849															37.6977	0.793313		24.1159	0.81459		4.9441	0.796353
				-0.98735	0.00155901		-0.98735	-0.00584628			-0.98735	-0.0122772		-0.98735	0.00798992			12	0.05649			12	0.05649															37.6977	0.796353		24.1159	0.817629		4.9441	0.799392
				-0.987325	-0.000389752		-0.987325	-0.00175388			-0.987325	-0.00818479		-0.987325	0.00896429			12	0.05474			12	0.05474															38.058	0.796353		24.4431	0.817629		4.95652	0.799392
				-0.9873	0.000389752		-0.9873	-0.00428727			-0.9873	-0.00545653		-0.9873	0.0103284			12	0.018265			12	0.018265															38.058	0.799392		24.4431	0.820669		4.95652	0.802432
				-0.987275	0.00097438		-0.987275	-0.00155901			-0.987275	-0.00253339		-0.987275	0.0113028			12	0.01514			12	0.01514															38.236	0.799392		24.5093	0.820669		5.03106	0.802432
				-0.98725	-0.00175388		-0.98725	0.00175388			-0.98725	0.00116926		-0.98725	0.0105233			12	0.009565			12	0.009565															38.236	0.802432		24.5093	0.823708		5.03106	0.805471
				-0.987225	-0.00292314		-0.987225	0.00701554			-0.987225	0.00779504		-0.987225	0.0097438			12	0.00044			12	0.00044															38.6335	0.802432		24.559	0.823708		5.29607	0.805471
				-0.9872	-0.000779504		-0.9872	0.0048719			-0.9872	0.00954892		-0.9872	0.00662578			12	-0.004085			12	-0.004085															38.6335	0.805471		24.559	0.826748		5.29607	0.808511
				-0.987175	0.000584628		-0.987175	0.000194876			-0.987175	0.00682066		-0.987175	0.00506678			12	-0.01606			12	-0.01606															38.9814	0.805471		24.824	0.826748		5.36232	0.808511
				-0.98715	-0.00350777		-0.98715	-0.0056514			-0.98715	0.000389752		-0.98715	0.0040924			12	-0.19426			12	-0.19426															38.9814	0.808511		24.824	0.829787		5.36232	0.81155
				-0.987125	-0.00467702		-0.987125	-0.00643091			-0.987125	-0.00272826		-0.987125	-0.00116926			12	-0.22336			12	-0.22336															40.1077	0.808511		25.0807	0.829787		5.51139	0.81155
				-0.9871	-0.00311802		-0.9871	-0.00545653			-0.9871	0.00136413		-0.9871	-0.00779504			12	-0.32056			12	-0.32056															40.1077	0.81155		25.0807	0.832827		5.51139	0.81459
				-0.987075	-0.00253339		-0.987075	-0.00194876			-0.987075	0.0048719		-0.987075	-0.00993867			12	-0.33236			12	-0.33236															40.7867	0.81155		25.5569	0.832827		5.51967	0.81459
				-0.98705	-0.0040924		-0.98705	0.000389752			-0.98705	0.00740529		-0.98705	-0.0111079			12	-0.38211			12	-0.38211															40.7867	0.81459		25.5569	0.835866		5.51967	0.817629
				-0.987025	-0.00311802		-0.987025	0.00194876			-0.987025	0.00370264		-0.987025	-0.0128618			12	-0.41841			12	-0.41841															41.5735	0.81459		25.8012	0.835866		5.54451	0.817629
				-0.987	-0.00272826		-0.987	0.00506678			-0.987	0.000779504		-0.987	-0.0111079			12	-0.57201			12	-0.57201															41.5735	0.817629		25.8012	0.838906		5.54451	0.820669
				-0.986975	-0.00116926		-0.986975	0.00662578			-0.986975	0.00448215		-0.986975	-0.00662578			12	-0.70946			12	-0.70946															42.0166	0.817629		25.8882	0.838906		5.56108	0.820669
				-0.98695	-0.00175388		-0.98695	0.00857454			-0.98695	0.00954892		-0.98695	-0.00682066			12	-0.728735			12	-0.728735															42.0166	0.820669		25.8882	0.841945		5.56108	0.823708
				-0.986925	-0.00136413		-0.986925	0.00604116			-0.986925	0.0116926		-0.986925	-0.0138362			12	-0.95441			12	-0.95441															42.1408	0.820669		26.3271	0.841945		5.63147	0.823708
				-0.9869	0.00097438		-0.9869	0.00623603			-0.9869	0.00896429		-0.9869	-0.0177337			11	1.98559			11	1.98559															42.1408	0.823708		26.3271	0.844985		5.63147	0.826748
				-0.986875	0.00097438		-0.986875	0.00350777			-0.986875	0.00253339		-0.986875	-0.0116926			11	1.87189			11	1.87189															42.1491	0.823708		26.6046	0.844985		5.65631	0.826748
				-0.98685	-0.00097438		-0.98685	0			-0.98685	-0.00272826		-0.98685	-0.00798992			11	1.76579			11	1.76579															42.1491	0.826748		26.6046	0.848024		5.65631	0.829787
				-0.986825	-0.00350777		-0.986825	-0.00643091			-0.986825	-0.00175388		-0.986825	-0.0097438			11	1.69124			11	1.69124															42.3975	0.826748		26.6584	0.848024		5.72257	0.829787
				-0.9868	-0.00584628		-0.9868	-0.0056514			-0.9868	-0.000389752		-0.9868	-0.0105233			11	1.55139			11	1.55139															42.3975	0.829787		26.6584	0.851064		5.72257	0.832827
				-0.986775	-0.00643091		-0.986775	-0.00194876			-0.986775	0.000584628		-0.986775	-0.0056514			11	1.53394			11	1.53394															43.1925	0.829787		27.2795	0.851064		5.7764	0.832827
				-0.98675	-0.00682066		-0.98675	0			-0.98675	-0.000779504		-0.98675	-0.000779504			11	1.37649			11	1.37649															43.1925	0.832827		27.2795	0.854103		5.7764	0.835866
				-0.986725	-0.00116926		-0.986725	0.00272826			-0.986725	0.00116926		-0.986725	0.00701554			11	1.27664			11	1.27664															43.2961	0.832827		27.7226	0.854103		5.83023	0.835866
				-0.9867	0.00233851		-0.9867	0.00155901			-0.9867	-0.000584628		-0.9867	0.0109131			11	1.17449			11	1.17449															43.2961	0.835866		27.7226	0.857143		5.83023	0.838906
				-0.986675	0.00370264		-0.986675	0.00370264			-0.986675	0.0040924		-0.986675	0.00779504			11	1.02724			11	1.02724															43.3085	0.835866		28.4472	0.857143		5.9089	0.838906
				-0.98665	0.00136413		-0.98665	0.00097438			-0.98665	0.00233851		-0.98665	0.0048719			11	0.97149			11	0.97149															43.3085	0.838906		28.4472	0.860182		5.9089	0.841945
				-0.986625	-0.00155901		-0.986625	0.00097438			-0.986625	-0.00136413		-0.986625	0.00253339			11	0.91249			11	0.91249															43.3251	0.838906		28.6874	0.860182		5.92961	0.841945
				-0.9866	-0.000779504		-0.9866	0.000779504			-0.9866	-0.00526165		-0.9866	0.00233851			11	0.862165			11	0.862165															43.3251	0.841945		28.6874	0.863222		5.92961	0.844985
				-0.986575	-0.000389752		-0.986575	0.00233851			-0.986575	0.000779504		-0.986575	0.00448215			11	0.85619			11	0.85619															44.853	0.841945		28.8447	0.863222		5.98344	0.844985
				-0.98655	-0.00389752		-0.98655	0.00116926			-0.98655	0.00389752		-0.98655	-0.00155901			11	0.72464			11	0.72464															44.853	0.844985		28.8447	0.866261		5.98344	0.848024
				-0.986525	-0.00623603		-0.986525	-0.00272826			-0.986525	0.00292314		-0.986525	-0.00740529			11	0.70809			11	0.70809															45.1884	0.844985		29.0973	0.866261		6.0911	0.848024
				-0.9865	-0.00798992		-0.9865	-0.00292314			-0.9865	0.00214364		-0.9865	-0.0103284			11	0.61389			11	0.61389															45.1884	0.848024		29.0973	0.869301		6.0911	0.851064
				-0.986475	-0.0120823		-0.986475	-0.00155901			-0.986475	0.00272826		-0.986475	-0.00467702			11	0.57114			11	0.57114															45.3789	0.848024		29.5735	0.869301		6.14079	0.851064
				-0.98645	-0.0140311		-0.98645	-0.000584628			-0.98645	0.00389752		-0.98645	0.00097438			11	0.56629			11	0.56629															45.3789	0.851064		29.5735	0.87234		6.14079	0.854103
				-0.986425	-0.0116926		-0.986425	0.00194876			-0.986425	0.00389752		-0.986425	-0.00214364			11	0.52254			11	0.52254															45.9296	0.851064		29.7184	0.87234		6.26915	0.854103
				-0.9864	-0.00818479		-0.9864	0.0048719			-0.9864	0.00272826		-0.9864	-0.00623603			11	0.51864			11	0.51864															45.9296	0.854103		29.7184	0.87538		6.26915	0.857143
				-0.986375	-0.00331289		-0.986375	0.00604116			-0.986375	0.000779504		-0.986375	-0.00467702			11	0.50889			11	0.50889															46.3313	0.854103		29.9545	0.87538		6.33126	0.857143
				-0.98635	-0.00194876		-0.98635	0.00233851			-0.98635	-0.00311802		-0.98635	0.000584628			11	0.50809			11	0.50809															46.3313	0.857143		29.9545	0.878419		6.33126	0.860182
				-0.986325	-0.00253339		-0.986325	-0.00272826			-0.986325	-0.00526165		-0.986325	0.00623603			11	0.415365			11	0.415365															46.7536	0.857143		29.9876	0.878419		6.42236	0.860182
				-0.9863	-0.00389752		-0.9863	-0.00116926			-0.9863	-0.0056514		-0.9863	0.0105233			11	0.40899			11	0.40899															46.7536	0.860182		29.9876	0.881459		6.42236	0.863222
				-0.986275	-0.0040924		-0.986275	0.000584628			-0.986275	-0.00623603		-0.986275	0.00818479			11	0.40734			11	0.40734															47.1511	0.860182		30.1532	0.881459		6.47205	0.863222
				-0.98625	-0.00194876		-0.98625	0.00292314			-0.98625	-0.0040924		-0.98625	0.0056514			11	0.37619			11	0.37619															47.1511	0.863222		30.1532	0.884498		6.47205	0.866261
				-0.986225	0.00311802		-0.986225	0.000194876			-0.986225	-0.0040924		-0.986225	0.00194876			11	0.32044			11	0.32044															49.3623	0.863222		30.6335	0.884498		6.56729	0.866261
				-0.9862	0.00253339		-0.9862	-0.00136413			-0.9862	0		-0.9862	-0.000779504			11	0.267265			11	0.267265															49.3623	0.866261		30.6335	0.887538		6.56729	0.869301
				-0.986175	0.00506678		-0.986175	-0.00136413			-0.986175	0		-0.986175	-0.00194876			11	0.26599			11	0.26599															49.528	0.866261		31.0518	0.887538		6.60455	0.869301
				-0.98615	0.00682066		-0.98615	0.0048719			-0.98615	0.00116926		-0.98615	-0.00136413			11	0.212965			11	0.212965															49.528	0.869301		31.0518	0.890578		6.60455	0.87234
				-0.986125	0.00682066		-0.986125	0.00701554			-0.986125	-0.000779504		-0.986125	-0.00136413			11	0.20754			11	0.20754															52.6294	0.869301		31.2505	0.890578		6.64596	0.87234
				-0.9861	0.000194876		-0.9861	0.00155901			-0.9861	-0.00116926		-0.9861	-0.000389752			11	0.20429			11	0.20429															52.6294	0.87234		31.2505	0.893617		6.64596	0.87538
				-0.986075	-0.00506678		-0.986075	-0.00760016			-0.986075	-0.00233851		-0.986075	0.00389752			11	0.16259			11	0.16259															52.9565	0.87234		31.5859	0.893617		6.65424	0.87538
				-0.98605	-0.00233851		-0.98605	-0.00857454			-0.98605	-0.00370264		-0.98605	0.00876942			11	0.122465			11	0.122465															52.9565	0.87538		31.5859	0.896657		6.65424	0.878419
				-0.986025	0		-0.986025	-0.00526165			-0.986025	-0.00428727		-0.986025	0.00701554			11	0.116215			11	0.116215															54.7412	0.87538		31.6605	0.896657		6.67081	0.878419
				-0.986	-0.00194876		-0.986	0.00097438			-0.986	-0.00253339		-0.986	0.00682066			11	0.07134			11	0.07134															54.7412	0.878419		31.6605	0.899696		6.67081	0.881459
				-0.985975	-0.00272826		-0.985975	0.00467702			-0.985975	-0.00155901		-0.985975	0.00896429			11	-0.01036			11	-0.01036															55.5445	0.878419		31.6853	0.899696		6.80331	0.881459
				-0.98595	-0.000779504		-0.98595	0.00097438			-0.98595	0		-0.98595	0.00740529			11	-0.05226			11	-0.05226															55.5445	0.881459		31.6853	0.902736		6.80331	0.884498
				-0.985925	0.00097438		-0.985925	-0.00701554			-0.985925	-0.00233851		-0.985925	0.000584628			11	-0.09021			11	-0.09021															56.1781	0.881459		31.7888	0.902736		6.86128	0.884498
				-0.9859	-0.00097438		-0.9859	-0.00662578			-0.9859	-0.00253339		-0.9859	-0.000584628			11	-0.22456			11	-0.22456															56.1781	0.884498		31.7888	0.905775		6.86128	0.887538
				-0.985875	-0.00214364		-0.985875	-0.00331289			-0.985875	-0.00292314		-0.985875	0.00506678			11	-0.444585			11	-0.444585															58.1366	0.884498		32.3644	0.905775		7.09317	0.887538
				-0.98585	0.00155901		-0.98585	-0.00155901			-0.98585	0		-0.98585	0.0122772			11	-0.45426			11	-0.45426															58.1366	0.887538		32.3644	0.908815		7.09317	0.890578
				-0.985825	0.00779504		-0.985825	0.00116926			-0.985825	0.00915917		-0.985825	0.0116926			11	-0.78141			11	-0.78141															58.207	0.887538		33.2795	0.908815		7.18012	0.890578
				-0.9858	0.00779504		-0.9858	0.00253339			-0.9858	0.0161747		-0.9858	0.0114977			11	-0.98576			11	-0.98576															58.207	0.890578		33.2795	0.911854		7.18012	0.893617
				-0.985775	0.00701554		-0.985775	0.00467702			-0.985775	0.00954892		-0.985775	0.0097438			10	1.81702			10	1.81702															58.5052	0.890578		33.6108	0.911854		7.3499	0.893617
				-0.98575	0.00876942		-0.98575	0.000389752			-0.98575	0.00097438		-0.98575	0.00428727			10	1.76474			10	1.76474															58.5052	0.893617		33.6108	0.914894		7.3499	0.896657
				-0.985725	0.00643091		-0.985725	-0.0048719			-0.985725	0.00155901		-0.985725	-0.00097438			10	1.75274			10	1.75274															58.5756	0.893617		33.8012	0.914894		7.42443	0.896657
				-0.9857	0.00311802		-0.9857	-0.0056514			-0.9857	0.00604116		-0.9857	-0.00818479			10	1.32814			10	1.32814															58.5756	0.896657		33.8012	0.917933		7.42443	0.899696
				-0.985675	-0.00253339		-0.985675	-0.00467702			-0.985675	0.0048719		-0.985675	-0.0134464			10	1.21379			10	1.21379															58.6377	0.896657		34.0663	0.917933		7.72671	0.899696
				-0.98565	0.000389752		-0.98565	-0.00448215			-0.98565	0		-0.98565	-0.0124721			10	0.91849			10	0.91849															58.6377	0.899696		34.0663	0.920973		7.72671	0.902736
				-0.985625	0.00526165		-0.985625	-0.00467702			-0.985625	-0.00194876		-0.985625	-0.00740529			10	0.916315			10	0.916315															58.911	0.899696		34.1532	0.920973		7.81366	0.902736
				-0.9856	0.00643091		-0.9856	-0.00467702			-0.9856	-0.00701554		-0.9856	0.000584628			10	0.90824			10	0.90824															58.911	0.902736		34.1532	0.924012		7.81366	0.905775
				-0.985575	0.00682066		-0.985575	-0.00506678			-0.985575	-0.0120823		-0.985575	-0.00155901			10	0.87439			10	0.87439															59.9876	0.902736		34.1739	0.924012		8.07867	0.905775
				-0.98555	0.00370264		-0.98555	-0.00272826			-0.98555	-0.0146157		-0.98555	-0.00448215			10	0.87309			10	0.87309															59.9876	0.905775		34.1739	0.927052		8.07867	0.908815
				-0.985525	0.00292314		-0.985525	-0.00214364			-0.985525	-0.00740529		-0.985525	-0.00155901			10	0.86904			10	0.86904															61.9876	0.905775		34.7702	0.927052		8.50104	0.908815
				-0.9855	0.00272826		-0.9855	-0.00272826			-0.9855	-0.000584628		-0.9855	-0.000779504			10	0.83539			10	0.83539															61.9876	0.908815		34.7702	0.930091		8.50104	0.911854
				-0.985475	0.00155901		-0.985475	-0.00389752			-0.985475	0		-0.985475	-0.0040924			10	0.82184			10	0.82184															62.6832	0.908815		34.7785	0.930091		8.82816	0.911854
				-0.98545	-0.00311802		-0.98545	-0.00214364			-0.98545	-0.00272826		-0.98545	0.00272826			10	0.80709			10	0.80709															62.6832	0.911854		34.7785	0.933131		8.82816	0.914894
				-0.985425	-0.00350777		-0.985425	-0.00350777			-0.985425	-0.00467702		-0.985425	0.0056514			10	0.76284			10	0.76284															62.8696	0.911854		35.1967	0.933131		9.86749	0.914894
				-0.9854	0.000194876		-0.9854	-0.00467702			-0.9854	-0.0040924		-0.9854	0.00428727			10	0.76104			10	0.76104															62.8696	0.914894		35.1967	0.93617		9.86749	0.917933
				-0.985375	0.00760016		-0.985375	-0.00662578			-0.985375	-0.00389752		-0.985375	-0.0048719			10	0.749265			10	0.749265															65.5031	0.914894		35.2836	0.93617		9.90476	0.917933
				-0.98535	0.00954892		-0.98535	-0.00428727			-0.98535	-0.00389752		-0.98535	-0.0118874			10	0.61909			10	0.61909															65.5031	0.917933		35.2836	0.93921		9.90476	0.920973
				-0.985325	0.0111079		-0.985325	-0.00155901			-0.985325	-0.00253339		-0.985325	-0.00837967			10	0.60644			10	0.60644															65.8634	0.917933		35.5445	0.93921		10.3768	0.920973
				-0.9853	0.00837967		-0.9853	0.000584628			-0.9853	-0.00097438		-0.9853	-0.000779504			10	0.56704			10	0.56704															65.8634	0.920973		35.5445	0.942249		10.3768	0.924012
				-0.985275	0.00643091		-0.985275	0			-0.985275	0.000779504		-0.985275	0.000389752			10	0.56129			10	0.56129															66.1656	0.920973		35.8551	0.942249		10.9275	0.924012
				-0.98525	0.00389752		-0.98525	-0.000779504			-0.98525	-0.000584628		-0.98525	-0.00155901			10	0.54679			10	0.54679															66.1656	0.924012		35.8551	0.945289		10.9275	0.927052
				-0.985225	0.00214364		-0.985225	-0.00233851			-0.985225	-0.00155901		-0.985225	-0.00428727			10	0.51099			10	0.51099															66.8116	0.924012		37.5404	0.945289		11.1387	0.927052
				-0.9852	0.00331289		-0.9852	-0.00116926			-0.9852	-0.00370264		-0.9852	-0.00721041			10	0.46684			10	0.46684															66.8116	0.927052		37.5404	0.948328		11.1387	0.930091
				-0.985175	0.00350777		-0.985175	-0.00136413			-0.985175	-0.000389752		-0.985175	-0.00798992			10	0.44389			10	0.44389															67.5569	0.927052		38.2277	0.948328		11.2008	0.930091
				-0.98515	-0.00350777		-0.98515	-0.00350777			-0.98515	0.00253339		-0.98515	-0.00604116			10	0.416615			10	0.416615															67.5569	0.930091		38.2277	0.951368		11.2008	0.933131
				-0.985125	-0.0103284		-0.985125	-0.00740529			-0.985125	0.00272826		-0.985125	0.000194876			10	0.40749			10	0.40749															67.6356	0.930091		38.7992	0.951368		11.4493	0.933131
				-0.9851	-0.0056514		-0.9851	-0.00233851			-0.9851	0.00389752		-0.9851	0.00545653			10	0.40609			10	0.40609															67.6356	0.933131		38.7992	0.954407		11.4493	0.93617
				-0.985075	0.00272826		-0.985075	0.00428727			-0.985075	0.00331289		-0.985075	0.000584628			10	0.30834			10	0.30834															68.2112	0.933131		39.2422	0.954407		11.8219	0.93617
				-0.98505	0.00370264		-0.98505	0.00506678			-0.98505	0.00448215		-0.98505	0.00350777			10	0.30679			10	0.30679															68.2112	0.93617		39.2422	0.957447		11.8219	0.93921
				-0.985025	0.00214364		-0.985025	0.00175388			-0.985025	0.00506678		-0.985025	0.00584628			10	0.267215			10	0.267215															69.1014	0.93617		39.6108	0.957447		13.0725	0.93921
				-0.985	0.00506678		-0.985	-0.000194876			-0.985	0.0056514		-0.985	0.0105233			10	0.25669			10	0.25669															69.1014	0.93921		39.6108	0.960486		13.0725	0.942249
				-0.984975	0.00623603		-0.984975	-0.000584628			-0.984975	0.00194876		-0.984975	0.00682066			10	0.20849			10	0.20849															69.1967	0.93921		40.2774	0.960486		13.4203	0.942249
				-0.98495	-0.000584628		-0.98495	0.00097438			-0.98495	-0.00370264		-0.98495	0.00545653			10	0.17769			10	0.17769															69.1967	0.942249		40.2774	0.963526		13.4203	0.945289
				-0.984925	-0.00428727		-0.984925	0.00389752			-0.984925	-0.00545653		-0.984925	0.00701554			10	0.16654			10	0.16654															69.412	0.942249		40.4224	0.963526		13.4451	0.945289
				-0.9849	0.000389752		-0.9849	0.00779504			-0.9849	-0.00350777		-0.9849	0.00604116			10	0.16089			10	0.16089															69.412	0.945289		40.4224	0.966565		13.4451	0.948328
				-0.984875	0.0056514		-0.984875	0.00584628			-0.984875	-0.00350777		-0.984875	0.0040924			10	0.11954			10	0.11954															69.9752	0.945289		40.853	0.966565		13.9834	0.948328
				-0.98485	-0.00253339		-0.98485	-0.00233851			-0.98485	-0.00467702		-0.98485	0.00194876			10	0.117565			10	0.117565															69.9752	0.948328		40.853	0.969605		13.9834	0.951368
				-0.984825	-0.00662578		-0.984825	-0.00993867			-0.984825	-0.00779504		-0.984825	-0.00155901			10	0.09394			10	0.09394															72.5135	0.948328		42.588	0.969605		14.2981	0.951368
				-0.9848	-0.00136413		-0.9848	-0.00623603			-0.9848	-0.00604116		-0.9848	-0.00136413			10	0.07234			10	0.07234															72.5135	0.951368		42.588	0.972644		14.2981	0.954407
				-0.984775	0.00175388		-0.984775	-0.00214364			-0.984775	-0.00116926		-0.984775	0.00526165			10	0.062315			10	0.062315															72.9027	0.951368		44.7412	0.972644		15.0932	0.954407
				-0.98475	-0.00194876		-0.98475	-0.00389752			-0.98475	0.00331289		-0.98475	0.00798992			10	0.02084			10	0.02084															72.9027	0.954407		44.7412	0.975684		15.0932	0.957447
				-0.984725	-0.00721041		-0.984725	-0.00818479			-0.984725	-0.00214364		-0.984725	-0.00526165			10	0.00894			10	0.00894															73.2381	0.954407		46.2692	0.975684		15.971	0.957447
				-0.9847	-0.00448215		-0.9847	-0.00915917			-0.9847	-0.00194876		-0.9847	-0.0153952			10	-0.243685			10	-0.243685															73.2381	0.957447		46.2692	0.978723		15.971	0.960486
				-0.984675	-0.00253339		-0.984675	-0.00584628			-0.984675	0.00116926		-0.984675	-0.0124721			10	-0.27631			10	-0.27631															74.2567	0.957447		46.4845	0.978723		16.3685	0.960486
				-0.98465	-0.00214364		-0.98465	-0.000779504			-0.98465	0.000389752		-0.98465	-0.00584628			10	-0.29906			10	-0.29906															74.2567	0.960486		46.4845	0.981763		16.3685	0.963526
				-0.984625	-0.00389752		-0.984625	0.00623603			-0.984625	-0.00155901		-0.984625	-0.00331289			10	-0.40256			10	-0.40256															75.4079	0.960486		46.9441	0.981763		16.8737	0.963526
				-0.9846	-0.0048719		-0.9846	0.00798992			-0.9846	-0.00311802		-0.9846	0			10	-0.41276			10	-0.41276															75.4079	0.963526		46.9441	0.984802		16.8737	0.966565
				-0.984575	-0.00682066		-0.984575	0.00643091			-0.984575	-0.00136413		-0.984575	0.00233851			10	-0.49086			10	-0.49086															77.0849	0.963526		48.4472	0.984802		18.2153	0.966565
				-0.98455	-0.00896429		-0.98455	0.00272826			-0.98455	0.00194876		-0.98455	0.0048719			10	-0.633035			10	-0.633035															77.0849	0.966565		48.4472	0.987842		18.2153	0.969605
				-0.984525	-0.00662578		-0.984525	-0.00155901			-0.984525	0.00623603		-0.984525	0.0056514			10	-0.66391			10	-0.66391															81.4286	0.966565		54.766	0.987842		18.9689	0.969605
				-0.9845	-0.000194876		-0.9845	0.000194876			-0.9845	0.00643091		-0.9845	0.00467702			10	-0.74686			10	-0.74686															81.4286	0.969605		54.766	0.990881		18.9689	0.972644
				-0.984475	0.00370264		-0.984475	0.00311802			-0.984475	0.00370264		-0.984475	0.000779504			10	-0.97306			10	-0.97306															81.8841	0.969605		55.1346	0.990881		19.6812	0.972644
				-0.98445	-0.000584628		-0.98445	0.00233851			-0.98445	-0.00292314		-0.98445	-0.000389752			9	1.90739			9	1.90739															81.8841	0.972644		55.1346	0.993921		19.6812	0.975684
				-0.984425	-0.00584628		-0.984425	-0.000194876			-0.984425	-0.00272826		-0.984425	0.00194876			9	1.78524			9	1.78524															82.323	0.972644		61.7516	0.993921		19.7888	0.975684
				-0.9844	-0.00175388		-0.9844	-0.00467702			-0.9844	0.00194876		-0.9844	0.00545653			9	1.73649			9	1.73649															82.323	0.975684		61.7516	0.99696		19.7888	0.978723
				-0.984375	0.00097438		-0.984375	-0.0097438			-0.984375	0.00526165		-0.984375	0.00760016			9	1.43907			9	1.43907															88.53	0.975684		66.6584	0.99696		20.8986	0.978723
				-0.98435	-0.00233851		-0.98435	-0.00837967			-0.98435	0.00896429		-0.98435	0.00662578			9	1.42169			9	1.42169															88.53	0.978723		66.6584	1		20.8986	0.981763
				-0.984325	-0.00604116		-0.984325	-0.00584628			-0.984325	0.0126669		-0.984325	0.00506678			9	1.38139			9	1.38139															89.3913	0.978723		Inf	1		21.0269	0.981763
				-0.9843	-0.00272826		-0.9843	-0.00331289			-0.9843	0.0103284		-0.9843	0.00350777			9	1.01469			9	1.01469															89.3913	0.981763					21.0269	0.984802
				-0.984275	0.00389752		-0.984275	-0.000389752			-0.984275	0.00857454		-0.984275	0.00506678			9	0.96229			9	0.96229															90.3768	0.981763					21.176	0.984802
				-0.98425	0.00272826		-0.98425	0.00175388			-0.98425	0.00233851		-0.98425	0.00467702			9	0.95859			9	0.95859															90.3768	0.984802					21.176	0.987842
				-0.984225	0.00155901		-0.984225	0.00155901			-0.984225	0.00175388		-0.984225	-0.00214364			9	0.90729			9	0.90729															90.6004	0.984802					21.4369	0.987842
				-0.9842	-0.000779504		-0.9842	0.00233851			-0.9842	0.00097438		-0.9842	-0.00233851			9	0.818065			9	0.818065															90.6004	0.987842					21.4369	0.990881
				-0.984175	0.000779504		-0.984175	0.00214364			-0.984175	-0.00233851		-0.984175	-0.00136413			9	0.771915			9	0.771915															95.2712	0.987842					21.4451	0.990881
				-0.98415	0.00194876		-0.98415	0.00233851			-0.98415	-0.00623603		-0.98415	0.000779504			9	0.763165			9	0.763165															95.2712	0.990881					21.4451	0.993921
				-0.984125	0.00623603		-0.984125	0.00097438			-0.984125	-0.00545653		-0.984125	0.00350777			9	0.68199			9	0.68199															96.2774	0.990881					22.2692	0.993921
				-0.9841	0.00448215		-0.9841	-0.00136413			-0.9841	0.000584628		-0.9841	0.00662578			9	0.67189			9	0.67189															96.2774	0.993921					22.2692	0.99696
				-0.984075	0.00526165		-0.984075	-0.00292314			-0.984075	0.00467702		-0.984075	0.00876942			9	0.66729			9	0.66729															102.588	0.993921					26.3106	0.99696
				-0.98405	0.00272826		-0.98405	-0.000194876			-0.98405	0.00467702		-0.98405	0.00584628			9	0.66309			9	0.66309															102.588	0.99696					26.3106	1
				-0.984025	0.00370264		-0.984025	0.00194876			-0.984025	0.00194876		-0.984025	-0.000584628			9	0.66164			9	0.66164															123.135	0.99696					Inf	1
				-0.984	0.00389752		-0.984	0.00467702			-0.984	-0.00662578		-0.984	-0.00915917			9	0.65249			9	0.65249															123.135	1
				-0.983975	0.00448215		-0.983975	0.00623603			-0.983975	-0.00721041		-0.983975	-0.0126669			9	0.63679			9	0.63679															Inf	1
				-0.98395	0.00194876		-0.98395	0.00370264			-0.98395	-0.00643091		-0.98395	-0.0183183			9	0.61289			9	0.61289
				-0.983925	-0.000389752		-0.983925	0.00214364			-0.983925	-0.00097438		-0.983925	-0.0196825			9	0.56064			9	0.56064
				-0.9839	0.0048719		-0.9839	0.00526165			-0.9839	0.00331289		-0.9839	-0.0165645			9	0.55749			9	0.55749
				-0.983875	0.00623603		-0.983875	0.00935405			-0.983875	0.00760016		-0.983875	-0.0113028			9	0.52539			9	0.52539
				-0.98385	0.00116926		-0.98385	0.00623603			-0.98385	0.0048719		-0.98385	-0.0048719			9	0.48604			9	0.48604
				-0.983825	-0.00370264		-0.983825	0.00292314			-0.983825	0.00175388		-0.983825	-0.00604116			9	0.47244			9	0.47244
				-0.9838	-0.00175388		-0.9838	0.0040924			-0.9838	-0.00604116		-0.9838	-0.00876942			9	0.374265			9	0.374265
				-0.983775	0.00233851		-0.983775	0.00350777			-0.983775	-0.00857454		-0.983775	-0.0111079			9	0.26894			9	0.26894
				-0.98375	-0.000194876		-0.98375	0.00155901			-0.98375	-0.00915917		-0.98375	-0.00311802			9	0.25704			9	0.25704
				-0.983725	-0.00175388		-0.983725	0.000779504			-0.983725	-0.00155901		-0.983725	0.00682066			9	0.254065			9	0.254065
				-0.9837	-0.00175388		-0.9837	-0.00292314			-0.9837	0.00428727		-0.9837	0.0185132			9	0.17034			9	0.17034
				-0.983675	0.000194876		-0.983675	-0.00311802			-0.983675	0.00097438		-0.983675	0.0130567			9	0.11414			9	0.11414
				-0.98365	-0.00272826		-0.98365	0.00272826			-0.98365	-0.00331289		-0.98365	0.0126669			9	0.10354			9	0.10354
				-0.983625	-0.0040924		-0.983625	0.00740529			-0.983625	-0.000779504		-0.983625	0.0113028			9	0.06794			9	0.06794
				-0.9836	0.000779504		-0.9836	0.00194876			-0.9836	0.00467702		-0.9836	0.0116926			9	0.017465			9	0.017465
				-0.983575	0.00721041		-0.983575	-0.00915917			-0.983575	0.00896429		-0.983575	0.00214364			9	0.014165			9	0.014165
				-0.98355	0.00428727		-0.98355	-0.00896429			-0.98355	0.00896429		-0.98355	-0.00194876			9	-0.08491			9	-0.08491
				-0.983525	0.000389752		-0.983525	-0.00837967			-0.983525	0.00194876		-0.983525	0.00331289			9	-0.19896			9	-0.19896
				-0.9835	0.00662578		-0.9835	-0.00721041			-0.9835	-0.00155901		-0.9835	0.0122772			9	-0.47396			9	-0.47396
				-0.983475	0.00896429		-0.983475	-0.00233851			-0.983475	0.000389752		-0.983475	0.0136413			9	-0.47861			9	-0.47861
				-0.98345	0.00428727		-0.98345	0.00467702			-0.98345	0.00214364		-0.98345	0.0153952			9	-0.52521			9	-0.52521
				-0.983425	-0.0040924		-0.983425	0.0148106			-0.983425	0.00253339		-0.983425	0.00915917			9	-0.54476			9	-0.54476
				-0.9834	-0.00097438		-0.9834	0.0163696			-0.9834	0.00331289		-0.9834	0.00194876			9	-0.584835			9	-0.584835
				-0.983375	0.00214364		-0.983375	0.0126669			-0.983375	-0.00233851		-0.983375	0.000584628			9	-0.72296			9	-0.72296
				-0.98335	-0.00370264		-0.98335	0.00682066			-0.98335	-0.00604116		-0.98335	-0.00233851			8	1.81894			8	1.81894
				-0.983325	-0.00740529		-0.983325	0.00097438			-0.983325	-0.00760016		-0.983325	-0.00116926			8	1.79981			8	1.79981
				-0.9833	-0.00584628		-0.9833	0.00116926			-0.9833	-0.00389752		-0.9833	0.00311802			8	1.77807			8	1.77807
				-0.983275	0.000389752		-0.983275	0.00116926			-0.983275	0.000584628		-0.983275	0.00506678			8	1.75439			8	1.75439
				-0.98325	0.0040924		-0.98325	0.0040924			-0.98325	0.00175388		-0.98325	0.00915917			8	1.73669			8	1.73669
				-0.983225	0.0056514		-0.983225	0.00331289			-0.983225	0.00097438		-0.983225	0.00760016			8	1.57849			8	1.57849
				-0.9832	0.00272826		-0.9832	-0.00662578			-0.9832	-0.000194876		-0.9832	0.00253339			8	1.51064			8	1.51064
				-0.983175	-0.00194876		-0.983175	-0.0144208			-0.983175	0.00194876		-0.983175	-0.00136413			8	1.42744			8	1.42744
				-0.98315	-0.00506678		-0.98315	-0.00643091			-0.98315	0.00272826		-0.98315	-0.00545653			8	1.35224			8	1.35224
				-0.983125	-0.00779504		-0.983125	0.00448215			-0.983125	0.00370264		-0.983125	-0.00662578			8	0.99434			8	0.99434
				-0.9831	-0.00760016		-0.9831	0.00292314			-0.9831	0.00272826		-0.9831	-0.0040924			8	0.93639			8	0.93639
				-0.983075	-0.00682066		-0.983075	0			-0.983075	0.00311802		-0.983075	-0.00350777			8	0.90704			8	0.90704
				-0.98305	-0.00662578		-0.98305	0.00331289			-0.98305	0.00467702		-0.98305	-0.00272826			8	0.87479			8	0.87479
				-0.983025	-0.00467702		-0.983025	0.00350777			-0.983025	0.00506678		-0.983025	-0.0114977			8	0.86554			8	0.86554
				-0.983	0.000194876		-0.983	0.000389752			-0.983	0.00428727		-0.983	-0.0153952			8	0.847665			8	0.847665
				-0.982975	0.00604116		-0.982975	-0.00097438			-0.982975	0.00175388		-0.982975	-0.0111079			8	0.81074			8	0.81074
				-0.98295	0.00662578		-0.98295	0.00292314			-0.98295	-0.00253339		-0.98295	-0.00545653			8	0.77054			8	0.77054
				-0.982925	0.00506678		-0.982925	0.00526165			-0.982925	-0.000779504		-0.982925	-0.0040924			8	0.73609			8	0.73609
				-0.9829	0.00370264		-0.9829	0.00116926			-0.9829	0.00097438		-0.9829	-0.00662578			8	0.707965			8	0.707965
				-0.982875	0.00097438		-0.982875	-0.00389752			-0.982875	-0.00155901		-0.982875	-0.0132516			8	0.65779			8	0.65779
				-0.98285	0.00116926		-0.98285	-0.00253339			-0.98285	0.00194876		-0.98285	-0.0152003			8	0.65084			8	0.65084
				-0.982825	0.00233851		-0.982825	0.00155901			-0.982825	0.00818479		-0.982825	-0.0150055			8	0.63069			8	0.63069
				-0.9828	0.00331289		-0.9828	0.00116926			-0.9828	0.0146157		-0.9828	-0.0107182			8	0.61694			8	0.61694
				-0.982775	0.0048719		-0.982775	0.00292314			-0.982775	0.0126669		-0.982775	-0.00506678			8	0.566015			8	0.566015
				-0.98275	0.000779504		-0.98275	0.00448215			-0.98275	0.00662578		-0.98275	0.00448215			8	0.56414			8	0.56414
				-0.982725	-0.00428727		-0.982725	0.0056514			-0.982725	0.000779504		-0.982725	-0.000194876			8	0.52544			8	0.52544
				-0.9827	-0.00545653		-0.9827	0.00311802			-0.9827	-0.00448215		-0.9827	-0.00584628			8	0.49454			8	0.49454
				-0.982675	-0.00350777		-0.982675	-0.00116926			-0.982675	-0.00779504		-0.982675	-0.00721041			8	0.475765			8	0.475765
				-0.98265	-0.0040924		-0.98265	-0.00136413			-0.98265	-0.00662578		-0.98265	-0.0114977			8	0.46339			8	0.46339
				-0.982625	-0.00643091		-0.982625	-0.00370264			-0.982625	-0.00779504		-0.982625	-0.0192927			8	0.40869			8	0.40869
				-0.9826	-0.00604116		-0.9826	-0.00643091			-0.9826	-0.00584628		-0.9826	-0.0208517			8	0.39479			8	0.39479
				-0.982575	-0.00428727		-0.982575	-0.00954892			-0.982575	-0.00097438		-0.982575	-0.0109131			8	0.31274			8	0.31274
				-0.98255	-0.000584628		-0.98255	-0.00837967			-0.98255	-0.00233851		-0.98255	-0.00194876			8	0.30839			8	0.30839
				-0.982525	0.00311802		-0.982525	-0.00233851			-0.982525	-0.0103284		-0.982525	-0.000584628			8	0.30564			8	0.30564
				-0.9825	0.00233851		-0.9825	0.00331289			-0.9825	-0.0126669		-0.9825	0.00233851			8	0.257015			8	0.257015
				-0.982475	0.00116926		-0.982475	0.00448215			-0.982475	-0.00604116		-0.982475	0.00506678			8	0.216215			8	0.216215
				-0.98245	0.00350777		-0.98245	0.00116926			-0.98245	0.00155901		-0.98245	0.00798992			8	0.167215			8	0.167215
				-0.982425	0.00682066		-0.982425	-0.00233851			-0.982425	0.000389752		-0.982425	0.00798992			8	0.156815			8	0.156815
				-0.9824	0.00604116		-0.9824	-0.000194876			-0.9824	-0.00175388		-0.9824	0.00467702			8	0.11274			8	0.11274
				-0.982375	0.00428727		-0.982375	0.00350777			-0.982375	-0.00214364		-0.982375	0.00526165			8	0.07504			8	0.07504
				-0.98235	0.00233851		-0.98235	0.00545653			-0.98235	-0.00214364		-0.98235	0.00253339			8	0.063515			8	0.063515
				-0.982325	0.000584628		-0.982325	0.00701554			-0.982325	0.00175388		-0.982325	0.00214364			8	0.04594			8	0.04594
				-0.9823	0.000584628		-0.9823	0.00233851			-0.9823	0		-0.9823	0.0040924			8	0.02134			8	0.02134
				-0.982275	-0.00272826		-0.982275	-0.00350777			-0.982275	-0.00779504		-0.982275	0.00740529			8	0.019965			8	0.019965
				-0.98225	-0.00954892		-0.98225	-0.000389752			-0.98225	-0.00896429		-0.98225	0.0116926			8	0.01354			8	0.01354
				-0.982225	-0.0148106		-0.982225	0.00643091			-0.982225	-0.00682066		-0.982225	0.00779504			8	-0.04831			8	-0.04831
				-0.9822	-0.0118874		-0.9822	0.00311802			-0.9822	-0.00233851		-0.9822	0.00428727			8	-0.08891			8	-0.08891
				-0.982175	-0.00370264		-0.982175	-0.00350777			-0.982175	-0.000389752		-0.982175	0.00604116			8	-0.37811			8	-0.37811
				-0.98215	-0.00136413		-0.98215	-0.000779504			-0.98215	0.00194876		-0.98215	0.00837967			8	-0.542935			8	-0.542935
				-0.982125	0		-0.982125	0.00370264			-0.982125	0.00097438		-0.982125	0.0128618			8	-0.66301			8	-0.66301
				-0.9821	-0.00194876		-0.9821	0.00136413			-0.9821	0.000194876		-0.9821	0.0187081			8	-0.695735			8	-0.695735
				-0.982075	-0.00467702		-0.982075	-0.00311802			-0.982075	0.00292314		-0.982075	0.0150055			8	-0.80341			8	-0.80341
				-0.98205	-0.0040924		-0.98205	-0.00155901			-0.98205	0.00721041		-0.98205	0.015785			8	-0.83956			8	-0.83956
				-0.982025	-0.00097438		-0.982025	0.0040924			-0.982025	0.00643091		-0.982025	0.0181235			8	-0.89466			8	-0.89466
				-0.982	-0.00116926		-0.982	0.0101336			-0.982	0.00526165		-0.982	0.0185132			7	1.95249			7	1.95249
				-0.981975	0.000389752		-0.981975	0.0103284			-0.981975	-0.000194876		-0.981975	0.0111079			7	1.94814			7	1.94814
				-0.98195	0.00292314		-0.98195	0.00545653			-0.98195	-0.00467702		-0.98195	0.00155901			7	1.94579			7	1.94579
				-0.981925	0.00526165		-0.981925	-0.000584628			-0.981925	-0.00155901		-0.981925	-0.00194876			7	1.93314			7	1.93314
				-0.9819	0.00389752		-0.9819	-0.00175388			-0.9819	0		-0.9819	-0.00837967			7	1.84301			7	1.84301
				-0.981875	0.00136413		-0.981875	-0.00604116			-0.981875	-0.00155901		-0.981875	-0.00954892			7	1.75694			7	1.75694
				-0.98185	0.000194876		-0.98185	-0.00682066			-0.98185	-0.0048719		-0.98185	-0.0155901			7	1.68624			7	1.68624
				-0.981825	0.00155901		-0.981825	-0.00584628			-0.981825	-0.0056514		-0.981825	-0.0218261			7	1.65739			7	1.65739
				-0.9818	0.00311802		-0.9818	-0.00253339			-0.9818	-0.00545653		-0.9818	-0.0259185			7	1.31529			7	1.31529
				-0.981775	0.00214364		-0.981775	0.00116926			-0.981775	-0.00604116		-0.981775	-0.0276724			7	1.11509			7	1.11509
				-0.98175	-0.00136413		-0.98175	0.000584628			-0.98175	-0.0048719		-0.98175	-0.0280621			7	1.01729			7	1.01729
				-0.981725	-0.00448215		-0.981725	0.000779504			-0.981725	-0.00116926		-0.981725	-0.0231902			7	0.95079			7	0.95079
				-0.9817	-0.00467702		-0.9817	-0.00253339			-0.9817	0.000194876		-0.9817	-0.0163696			7	0.928315			7	0.928315
				-0.981675	-0.00311802		-0.981675	-0.00701554			-0.981675	0.00136413		-0.981675	-0.0153952			7	0.90869			7	0.90869
				-0.98165	-0.00116926		-0.98165	-0.00526165			-0.98165	0.00155901		-0.98165	-0.0142259			7	0.81419			7	0.81419
				-0.981625	0.00467702		-0.981625	-0.00194876			-0.981625	0.00155901		-0.981625	-0.00740529			7	0.780415			7	0.780415
				-0.9816	0.00272826		-0.9816	-0.00272826			-0.9816	-0.000584628		-0.9816	-0.00136413			7	0.77129			7	0.77129
				-0.981575	-0.00116926		-0.981575	-0.00584628			-0.981575	-0.00136413		-0.981575	0.00155901			7	0.71034			7	0.71034
				-0.98155	-0.00116926		-0.98155	-0.00292314			-0.98155	0		-0.98155	0.0126669			7	0.662965			7	0.662965
				-0.981525	-0.00292314		-0.981525	0.00448215			-0.981525	0.00136413		-0.981525	0.0155901			7	0.66084			7	0.66084
				-0.9815	-0.00623603		-0.9815	0.00389752			-0.9815	0.0040924		-0.9815	0.0239697			7	0.61204			7	0.61204
				-0.981475	-0.00701554		-0.981475	0.00272826			-0.981475	0.00272826		-0.981475	0.0229954			7	0.61109			7	0.61109
				-0.98145	-0.00311802		-0.98145	0.00662578			-0.98145	0.00526165		-0.98145	0.0196825			7	0.57029			7	0.57029
				-0.981425	0.000779504		-0.981425	0.00837967			-0.981425	0.00506678		-0.981425	0.0179286			7	0.567665			7	0.567665
				-0.9814	0.00214364		-0.9814	0.00194876			-0.9814	0.00623603		-0.9814	0.0163696			7	0.56309			7	0.56309
				-0.981375	0.00116926		-0.981375	-0.00701554			-0.981375	0.00662578		-0.981375	0.0152003			7	0.50609			7	0.50609
				-0.98135	0.00214364		-0.98135	-0.00584628			-0.98135	0.00682066		-0.98135	0.0107182			7	0.43644			7	0.43644
				-0.981325	0.00194876		-0.981325	-0.00155901			-0.981325	0.00370264		-0.981325	0.00428727			7	0.41259			7	0.41259
				-0.9813	0.00272826		-0.9813	-0.000584628			-0.9813	0		-0.9813	-0.00389752			7	0.35114			7	0.35114
				-0.981275	0.00194876		-0.981275	0			-0.981275	-0.00584628		-0.981275	-0.00701554			7	0.29914			7	0.29914
				-0.98125	0		-0.98125	0.00097438			-0.98125	-0.00954892		-0.98125	-0.00292314			7	0.26689			7	0.26689
				-0.981225	-0.000194876		-0.981225	-0.000194876			-0.981225	-0.0103284		-0.981225	0.00116926			7	0.21254			7	0.21254
				-0.9812	-0.000194876		-0.9812	-0.00682066			-0.9812	-0.00798992		-0.9812	0.00740529			7	0.15734			7	0.15734
				-0.981175	0.00311802		-0.981175	-0.0128618			-0.981175	0		-0.981175	0.00662578			7	0.103515			7	0.103515
				-0.98115	0.00116926		-0.98115	-0.00682066			-0.98115	0.00584628		-0.98115	0.00389752			7	0.078565			7	0.078565
				-0.981125	0.00233851		-0.981125	0.00136413			-0.981125	0.00506678		-0.981125	0.00155901			7	0.05689			7	0.05689
				-0.9811	0.000779504		-0.9811	-0.00155901			-0.9811	-0.00136413		-0.9811	0.00701554			7	0.05484			7	0.05484
				-0.981075	-0.000194876		-0.981075	-0.0105233			-0.981075	-0.00389752		-0.981075	0.0161747			7	0.02624			7	0.02624
				-0.98105	0.00155901		-0.98105	-0.00876942			-0.98105	-0.00545653		-0.98105	0.0259185			7	0.01834			7	0.01834
				-0.981025	0.00467702		-0.981025	-0.00214364			-0.981025	-0.00721041		-0.981025	0.0222159			7	-0.19381			7	-0.19381
				-0.981	0.00662578		-0.981	0.0040924			-0.981	-0.00857454		-0.981	0.0159798			7	-0.20296			7	-0.20296
				-0.980975	0.00467702		-0.980975	0.00993867			-0.980975	-0.00837967		-0.980975	0.0155901			7	-0.21406			7	-0.21406
				-0.98095	0.00292314		-0.98095	0.0107182			-0.98095	-0.00350777		-0.98095	0.0132516			7	-0.255885			7	-0.255885
				-0.980925	-0.000389752		-0.980925	0.00954892			-0.980925	-0.00331289		-0.980925	0.00701554			7	-0.31846			7	-0.31846
				-0.9809	0.000584628		-0.9809	-0.00155901			-0.9809	-0.000389752		-0.9809	0.00331289			7	-0.35436			7	-0.35436
				-0.980875	0.00311802		-0.980875	-0.0122772			-0.980875	0		-0.980875	0.00350777			7	-0.58271			7	-0.58271
				-0.98085	0.00954892		-0.98085	-0.00857454			-0.98085	0.00370264		-0.98085	0.000389752			7	-0.69951			7	-0.69951
				-0.980825	0.0128618		-0.980825	0.00175388			-0.980825	-0.000194876		-0.980825	-0.00467702			7	-0.76536			7	-0.76536
				-0.9808	0.00954892		-0.9808	0.0040924			-0.9808	-0.00194876		-0.9808	-0.00837967			7	-0.80551			7	-0.80551
				-0.980775	-0.00136413		-0.980775	0.00292314			-0.980775	-0.00526165		-0.980775	-0.00740529			7	-0.89856			7	-0.89856
				-0.98075	-0.00701554		-0.98075	0.000194876			-0.98075	-0.00233851		-0.98075	-0.00448215			7	-0.91621			7	-0.91621
				-0.980725	-0.00837967		-0.980725	0.00136413			-0.980725	0.000584628		-0.980725	-0.00545653			7	-0.95091			7	-0.95091
				-0.9807	-0.00448215		-0.9807	0.00760016			-0.9807	-0.000389752		-0.9807	-0.00526165			6	1.94674			6	1.94674
				-0.980675	0		-0.980675	0.0101336			-0.980675	-0.00526165		-0.980675	-0.00721041			6	1.93779			6	1.93779
				-0.98065	-0.00448215		-0.98065	0.00584628			-0.98065	-0.00623603		-0.98065	-0.00506678			6	1.90477			6	1.90477
				-0.980625	-0.00623603		-0.980625	-0.00233851			-0.980625	-0.00428727		-0.980625	-0.00389752			6	1.89614			6	1.89614
				-0.9806	-0.00526165		-0.9806	-0.00721041			-0.9806	-0.00292314		-0.9806	0.000194876			6	1.87719			6	1.87719
				-0.980575	-0.00389752		-0.980575	-0.0140311			-0.980575	-0.00331289		-0.980575	0.00155901			6	1.81349			6	1.81349
				-0.98055	-0.0048719		-0.98055	-0.0167593			-0.98055	-0.00467702		-0.98055	0.0040924			6	1.48464			6	1.48464
				-0.980525	-0.00428727		-0.980525	-0.015785			-0.980525	-0.00155901		-0.980525	0.00214364			6	1.44434			6	1.44434
				-0.9805	-0.00448215		-0.9805	-0.0126669			-0.9805	0.00233851		-0.9805	-0.000779504			6	1.21144			6	1.21144
				-0.980475	-0.00331289		-0.980475	-0.00448215			-0.980475	0.00136413		-0.980475	-0.00370264			6	1.16069			6	1.16069
				-0.98045	-0.000779504		-0.98045	0.00292314			-0.98045	0.00370264		-0.98045	-0.00467702			6	1.08571			6	1.08571
				-0.980425	-0.00097438		-0.980425	0.00915917			-0.980425	0.00935405		-0.980425	-0.00506678			6	0.97089			6	0.97089
				-0.9804	-0.00682066		-0.9804	0.00760016			-0.9804	0.0120823		-0.9804	-0.00760016			6	0.96889			6	0.96889
				-0.980375	-0.00935405		-0.980375	0.00389752			-0.980375	0.00915917		-0.980375	-0.0107182			6	0.95759			6	0.95759
				-0.98035	-0.00311802		-0.98035	0.00526165			-0.98035	0.00798992		-0.98035	-0.0113028			6	0.95254			6	0.95254
				-0.980325	0.00253339		-0.980325	0.00545653			-0.980325	0.0105233		-0.980325	-0.0107182			6	0.913865			6	0.913865
				-0.9803	-0.000194876		-0.9803	0.0040924			-0.9803	0.0126669		-0.9803	-0.0107182			6	0.868765			6	0.868765
				-0.980275	-0.0048719		-0.980275	-0.000194876			-0.980275	0.00935405		-0.980275	-0.0126669			6	0.78479			6	0.78479
				-0.98025	-0.00623603		-0.98025	-0.00253339			-0.98025	0.00662578		-0.98025	-0.00876942			6	0.75874			6	0.75874
				-0.980225	-0.00370264		-0.980225	-0.00506678			-0.980225	0.00233851		-0.980225	-0.00389752			6	0.74209			6	0.74209
				-0.9802	0.00350777		-0.9802	0.000779504			-0.9802	0.000389752		-0.9802	0.00467702			6	0.73944			6	0.73944
				-0.980175	0.0111079		-0.980175	0.0097438			-0.980175	0.00155901		-0.980175	0.00760016			6	0.736115			6	0.736115
				-0.98015	0.0105233		-0.98015	0.00467702			-0.98015	0.00584628		-0.98015	0.00915917			6	0.71684			6	0.71684
				-0.980125	0.00545653		-0.980125	-0.00331289			-0.980125	0.00760016		-0.980125	0.00818479			6	0.67649			6	0.67649
				-0.9801	0.00233851		-0.9801	-0.00116926			-0.9801	0.0126669		-0.9801	0.00779504			6	0.667065			6	0.667065
				-0.980075	-0.00370264		-0.980075	0.00253339			-0.980075	0.0144208		-0.980075	0.00993867			6	0.64149			6	0.64149
				-0.98005	-0.00448215		-0.98005	0.00233851			-0.98005	0.015785		-0.98005	0.00760016			6	0.61669			6	0.61669
				-0.980025	-0.00448215		-0.980025	0.00214364			-0.980025	0.0148106		-0.980025	0.00389752			6	0.59459			6	0.59459
				-0.98	-0.00331289		-0.98	0.00272826			-0.98	0.00993867		-0.98	-0.0040924			6	0.57239			6	0.57239
				-0.979975	0.000194876		-0.979975	0.00155901			-0.979975	0.00292314		-0.979975	-0.00701554			6	0.56279			6	0.56279
				-0.97995	0.0040924		-0.97995	0.000584628			-0.97995	-0.00214364		-0.97995	-0.00311802			6	0.55854			6	0.55854
				-0.979925	0.00818479		-0.979925	-0.00448215			-0.979925	-0.00331289		-0.979925	0.00136413			6	0.55144			6	0.55144
				-0.9799	0.00682066		-0.9799	-0.0048719			-0.9799	-0.00272826		-0.9799	0.00467702			6	0.52894			6	0.52894
				-0.979875	0.00253339		-0.979875	-0.00311802			-0.979875	0.000194876		-0.979875	0.00467702			6	0.52204			6	0.52204
				-0.97985	0.00097438		-0.97985	-0.00526165			-0.97985	0.00233851		-0.97985	0.00272826			6	0.51934			6	0.51934
				-0.979825	-0.00097438		-0.979825	-0.00428727			-0.979825	0.00740529		-0.979825	0.00272826			6	0.45854			6	0.45854
				-0.9798	-0.000194876		-0.9798	-0.00331289			-0.9798	0.00798992		-0.9798	0.00370264			6	0.41719			6	0.41719
				-0.979775	0.00136413		-0.979775	-0.000584628			-0.979775	0.00155901		-0.979775	0.00194876			6	0.362865			6	0.362865
				-0.97975	0.00623603		-0.97975	-0.000194876			-0.97975	-0.00798992		-0.97975	-0.000194876			6	0.312765			6	0.312765
				-0.979725	0.00643091		-0.979725	0.00116926			-0.979725	-0.0169542		-0.979725	-0.00292314			6	0.27284			6	0.27284
				-0.9797	0.000779504		-0.9797	0.00331289			-0.9797	-0.0208517		-0.9797	-0.00740529			6	0.25764			6	0.25764
				-0.979675	-0.00526165		-0.979675	0.00370264			-0.979675	-0.015785		-0.979675	-0.0134464			6	0.21724			6	0.21724
				-0.97965	-0.00214364		-0.97965	-0.000584628			-0.97965	-0.00760016		-0.97965	-0.0155901			6	0.15709			6	0.15709
				-0.979625	0.00233851		-0.979625	-0.00370264			-0.979625	-0.00857454		-0.979625	-0.0105233			6	0.118915			6	0.118915
				-0.9796	0.000194876		-0.9796	-0.00097438			-0.9796	-0.00292314		-0.9796	-0.00175388			6	0.00909			6	0.00909
				-0.979575	-0.000194876		-0.979575	0.00292314			-0.979575	0.00136413		-0.979575	-0.00097438			6	0.00429			6	0.00429
				-0.97955	0.00214364		-0.97955	0.00175388			-0.97955	0.00428727		-0.97955	-0.00311802			6	-0.03696			6	-0.03696
				-0.979525	0.00292314		-0.979525	-0.00233851			-0.979525	0.00272826		-0.979525	-0.00643091			6	-0.05141			6	-0.05141
				-0.9795	-0.000584628		-0.9795	-0.0048719			-0.9795	-0.00292314		-0.9795	-0.0116926			6	-0.18046			6	-0.18046
				-0.979475	-0.00331289		-0.979475	-0.00389752			-0.979475	-0.00935405		-0.979475	-0.0101336			6	-0.22631			6	-0.22631
				-0.97945	0.000194876		-0.97945	-0.00116926			-0.97945	-0.0105233		-0.97945	-0.00701554			6	-0.24521			6	-0.24521
				-0.979425	0.0040924		-0.979425	0.000389752			-0.979425	-0.00993867		-0.979425	-0.00818479			6	-0.45011			6	-0.45011
				-0.9794	0.00194876		-0.9794	0.00155901			-0.9794	-0.0040924		-0.9794	-0.0132516			6	-0.531035			6	-0.531035
				-0.979375	-0.00331289		-0.979375	0.00370264			-0.979375	0		-0.979375	-0.0150055			6	-0.59176			6	-0.59176
				-0.97935	-0.00214364		-0.97935	0.00272826			-0.97935	0.00311802		-0.97935	-0.0126669			6	-0.621285			6	-0.621285
				-0.979325	-0.00116926		-0.979325	-0.000194876			-0.979325	0.000194876		-0.979325	-0.00545653			6	-0.70966			6	-0.70966
				-0.9793	0.000194876		-0.9793	0.00116926			-0.9793	0.00097438		-0.9793	-0.00136413			6	-0.831635			6	-0.831635
				-0.979275	0.00155901		-0.979275	0.00584628			-0.979275	0.00350777		-0.979275	-0.00526165			6	-0.83766			6	-0.83766
				-0.97925	0.00175388		-0.97925	0.00662578			-0.97925	0.00389752		-0.97925	-0.00506678			6	-0.95011			6	-0.95011
				-0.979225	0.00253339		-0.979225	0.00662578			-0.979225	0.00350777		-0.979225	-0.000584628			5	1.79104			5	1.79104
				-0.9792	-0.000389752		-0.9792	0.00545653			-0.9792	0.00155901		-0.9792	-0.000779504			5	1.74399			5	1.74399
				-0.979175	-0.00370264		-0.979175	0.00311802			-0.979175	-0.00097438		-0.979175	-0.00311802			5	1.67774			5	1.67774
				-0.97915	-0.00097438		-0.97915	-0.000584628			-0.97915	-0.00740529		-0.97915	-0.00370264			5	1.55129			5	1.55129
				-0.979125	0.00253339		-0.979125	-0.00623603			-0.979125	-0.0126669		-0.979125	0.00253339			5	1.50676			5	1.50676
				-0.9791	-0.000194876		-0.9791	-0.00331289			-0.9791	-0.0140311		-0.9791	0.00760016			5	1.46649			5	1.46649
				-0.979075	-0.00194876		-0.979075	-0.000584628			-0.979075	-0.0105233		-0.979075	0.00370264			5	1.44494			5	1.44494
				-0.97905	0.00214364		-0.97905	-0.00604116			-0.97905	-0.000389752		-0.97905	-0.000779504			5	1.44239			5	1.44239
				-0.979025	0.00175388		-0.979025	-0.0116926			-0.979025	0.00467702		-0.979025	-0.00370264			5	1.38169			5	1.38169
				-0.979	0.00194876		-0.979	-0.0105233			-0.979	0.0118874		-0.979	-0.0040924			5	1.08084			5	1.08084
				-0.978975	-0.00350777		-0.978975	-0.00623603			-0.978975	0.0126669		-0.978975	-0.00798992			5	1.04479			5	1.04479
				-0.97895	-0.00428727		-0.97895	-0.00545653			-0.97895	0.00896429		-0.97895	-0.0140311			5	0.97144			5	0.97144
				-0.978925	-0.00506678		-0.978925	-0.00370264			-0.978925	0.00682066		-0.978925	-0.0194876			5	0.96634			5	0.96634
				-0.9789	-0.00292314		-0.9789	-0.000194876			-0.9789	0.00448215		-0.9789	-0.0212415			5	0.92649			5	0.92649
				-0.978875	0.000194876		-0.978875	0.00311802			-0.978875	0.0048719		-0.978875	-0.017344			5	0.92289			5	0.92289
				-0.97885	0		-0.97885	0.00389752			-0.97885	0.00311802		-0.97885	-0.0128618			5	0.90394			5	0.90394
				-0.978825	-0.00116926		-0.978825	0.00233851			-0.978825	-0.00097438		-0.978825	-0.00876942			5	0.87434			5	0.87434
				-0.9788	-0.00448215		-0.9788	0			-0.9788	-0.00701554		-0.9788	-0.00604116			5	0.82274			5	0.82274
				-0.978775	-0.00818479		-0.978775	0.00331289			-0.978775	-0.00682066		-0.978775	-0.00233851			5	0.79099			5	0.79099
				-0.97875	-0.00818479		-0.97875	0.00506678			-0.97875	-0.0048719		-0.97875	-0.00272826			5	0.75049			5	0.75049
				-0.978725	-0.00643091		-0.978725	0.00370264			-0.978725	-0.00643091		-0.978725	-0.00233851			5	0.71289			5	0.71289
				-0.9787	-0.00448215		-0.9787	0.00136413			-0.9787	-0.00175388		-0.9787	-0.000194876			5	0.69569			5	0.69569
				-0.978675	-0.00253339		-0.978675	0.000194876			-0.978675	0.000389752		-0.978675	0.00740529			5	0.57529			5	0.57529
				-0.97865	-0.00350777		-0.97865	0.00253339			-0.97865	-0.00116926		-0.97865	0.0134464			5	0.55864			5	0.55864
				-0.978625	-0.00370264		-0.978625	0.0040924			-0.978625	-0.00798992		-0.978625	0.0136413			5	0.55739			5	0.55739
				-0.9786	-0.00292314		-0.9786	0.00448215			-0.9786	-0.0113028		-0.9786	0.00876942			5	0.55179			5	0.55179
				-0.978575	-0.000389752		-0.978575	0.00233851			-0.978575	-0.0114977		-0.978575	0.00428727			5	0.513615			5	0.513615
				-0.97855	-0.00253339		-0.97855	-0.000584628			-0.97855	-0.0040924		-0.97855	0.00194876			5	0.41959			5	0.41959
				-0.978525	-0.00526165		-0.978525	-0.00506678			-0.978525	-0.000584628		-0.978525	0.00526165			5	0.37529			5	0.37529
				-0.9785	-0.00311802		-0.9785	-0.0040924			-0.9785	0.00506678		-0.9785	0.00915917			5	0.26099			5	0.26099
				-0.978475	-0.00272826		-0.978475	-0.00116926			-0.978475	0.00350777		-0.978475	0.00584628			5	0.08484			5	0.08484
				-0.97845	-0.0056514		-0.97845	-0.00116926			-0.97845	-0.000584628		-0.97845	0.0048719			5	0.067815			5	0.067815
				-0.978425	-0.00467702		-0.978425	-0.00155901			-0.978425	-0.00545653		-0.978425	0.00857454			5	0.02484			5	0.02484
				-0.9784	0.00214364		-0.9784	0.00350777			-0.9784	-0.00935405		-0.9784	0.0107182			5	0.02119			5	0.02119
				-0.978375	0.00798992		-0.978375	0.00837967			-0.978375	-0.00389752		-0.978375	0.0126669			5	0.01924			5	0.01924
				-0.97835	0.00428727		-0.97835	0.00272826			-0.97835	0.00311802		-0.97835	0.0107182			5	-0.018435			5	-0.018435
				-0.978325	0.00292314		-0.978325	-0.00526165			-0.978325	0.00740529		-0.978325	0.00389752			5	-0.08506			5	-0.08506
				-0.9783	0.00915917		-0.9783	-0.00467702			-0.9783	0.00662578		-0.9783	-0.00389752			5	-0.104835			5	-0.104835
				-0.978275	0.0128618		-0.978275	0.000194876			-0.978275	-0.000779504		-0.978275	-0.00604116			5	-0.16701			5	-0.16701
				-0.97825	0.00643091		-0.97825	0.0040924			-0.97825	-0.0048719		-0.97825	-0.00311802			5	-0.20506			5	-0.20506
				-0.978225	0.000584628		-0.978225	0.00506678			-0.978225	-0.00194876		-0.978225	0.00526165			5	-0.20931			5	-0.20931
				-0.9782	-0.000389752		-0.9782	0.00721041			-0.9782	0.0048719		-0.9782	0.0142259			5	-0.62836			5	-0.62836
				-0.978175	0.00350777		-0.978175	0.00721041			-0.978175	0.00331289		-0.978175	0.018903			5	-0.84836			5	-0.84836
				-0.97815	0.00545653		-0.97815	0.00526165			-0.97815	0.00116926		-0.97815	0.0183183			5	-0.86071			5	-0.86071
				-0.978125	0.00798992		-0.978125	0.000584628			-0.978125	-0.00155901		-0.978125	0.0120823			4	1.92247			4	1.92247
				-0.9781	0.00798992		-0.9781	-0.00155901			-0.9781	-0.00194876		-0.9781	0.0126669			4	1.89574			4	1.89574
				-0.978075	0.00896429		-0.978075	0.000584628			-0.978075	0.00233851		-0.978075	0.0198773			4	1.81049			4	1.81049
				-0.97805	0.00682066		-0.97805	0.00253339			-0.97805	0.00506678		-0.97805	0.0247492			4	1.77401			4	1.77401
				-0.978025	0.00389752		-0.978025	0.00389752			-0.978025	0.0040924		-0.978025	0.0190978			4	1.66219			4	1.66219
				-0.978	0.00662578		-0.978	0.00428727			-0.978	0.00214364		-0.978	0.0097438			4	1.49744			4	1.49744
				-0.977975	0.00604116		-0.977975	0.00389752			-0.977975	0.00311802		-0.977975	0.00935405			4	1.49151			4	1.49151
				-0.97795	0.00798992		-0.97795	0.00311802			-0.97795	0.00370264		-0.97795	0.0103284			4	1.45957			4	1.45957
				-0.977925	0.00623603		-0.977925	0.00331289			-0.977925	-0.00136413		-0.977925	0.0103284			4	1.43247			4	1.43247
				-0.9779	0.00428727		-0.9779	-0.000584628			-0.9779	-0.00214364		-0.9779	0.00837967			4	1.28064			4	1.28064
				-0.977875	-0.00155901		-0.977875	-0.00350777			-0.977875	0.00194876		-0.977875	0.00272826			4	1.22654			4	1.22654
				-0.97785	0.000389752		-0.97785	-0.00545653			-0.97785	0.00798992		-0.97785	-0.00175388			4	1.18691			4	1.18691
				-0.977825	0		-0.977825	-0.00643091			-0.977825	0.0101336		-0.977825	-0.0056514			4	1.02274			4	1.02274
				-0.9778	0.000194876		-0.9778	-0.00331289			-0.9778	0.00993867		-0.9778	-0.00643091			4	0.990365			4	0.990365
				-0.977775	0.00136413		-0.977775	0.00214364			-0.977775	0.00604116		-0.977775	-0.00136413			4	0.97124			4	0.97124
				-0.97775	0.00233851		-0.97775	-0.00155901			-0.97775	0.00292314		-0.97775	0.00370264			4	0.91794			4	0.91794
				-0.977725	0.00311802		-0.977725	-0.00662578			-0.977725	0.00292314		-0.977725	-0.000194876			4	0.907765			4	0.907765
				-0.9777	0.000584628		-0.9777	-0.00682066			-0.9777	0.00253339		-0.9777	-0.00760016			4	0.85754			4	0.85754
				-0.977675	-0.00214364		-0.977675	-0.00584628			-0.977675	0.00233851		-0.977675	-0.0122772			4	0.820415			4	0.820415
				-0.97765	-0.00292314		-0.97765	-0.00876942			-0.97765	0.00584628		-0.97765	-0.0163696			4	0.81274			4	0.81274
				-0.977625	-0.00116926		-0.977625	-0.00896429			-0.977625	0.00428727		-0.977625	-0.017344			4	0.77279			4	0.77279
				-0.9776	0.00253339		-0.9776	-0.00526165			-0.9776	-0.000194876		-0.9776	-0.0159798			4	0.76264			4	0.76264
				-0.977575	0.00662578		-0.977575	0.000779504			-0.977575	-0.0056514		-0.977575	-0.0142259			4	0.71614			4	0.71614
				-0.97755	0.00467702		-0.97755	0.00272826			-0.97755	-0.00954892		-0.97755	-0.00779504			4	0.708015			4	0.708015
				-0.977525	0.00214364		-0.977525	0.00214364			-0.977525	-0.00779504		-0.977525	-0.00428727			4	0.70684			4	0.70684
				-0.9775	0.0048719		-0.9775	0.00155901			-0.9775	-0.00389752		-0.9775	-0.00526165			4	0.65814			4	0.65814
				-0.977475	0.00779504		-0.977475	0.000779504			-0.977475	-0.00292314		-0.977475	-0.00604116			4	0.65649			4	0.65649
				-0.97745	0.00604116		-0.97745	0.00136413			-0.97745	-0.00350777		-0.97745	-0.00993867			4	0.574315			4	0.574315
				-0.977425	0.00389752		-0.977425	-0.00136413			-0.977425	-0.00116926		-0.977425	-0.0153952			4	0.53164			4	0.53164
				-0.9774	0.00175388		-0.9774	0.000779504			-0.9774	0.000194876		-0.9774	-0.0206569			4	0.51719			4	0.51719
				-0.977375	-0.00272826		-0.977375	0.00643091			-0.977375	0.00584628		-0.977375	-0.0161747			4	0.412915			4	0.412915
				-0.97735	-0.00448215		-0.97735	0.00623603			-0.97735	0.00682066		-0.97735	-0.0109131			4	0.40829			4	0.40829
				-0.977325	-0.00701554		-0.977325	0.00584628			-0.977325	0.00915917		-0.977325	-0.0056514			4	0.40744			4	0.40744
				-0.9773	-0.00779504		-0.9773	0.00818479			-0.9773	0.00370264		-0.9773	0.00155901			4	0.37104			4	0.37104
				-0.977275	-0.0114977		-0.977275	0.00935405			-0.977275	-0.000779504		-0.977275	0.00155901			4	0.366715			4	0.366715
				-0.97725	-0.0132516		-0.97725	0.00623603			-0.97725	-0.00467702		-0.97725	-0.00311802			4	0.360865			4	0.360865
				-0.977225	-0.00798992		-0.977225	-0.00155901			-0.977225	-0.0056514		-0.977225	-0.000389752			4	0.35769			4	0.35769
				-0.9772	-0.00350777		-0.9772	-0.00740529			-0.9772	-0.00623603		-0.9772	0.00272826			4	0.30734			4	0.30734
				-0.977175	0.00292314		-0.977175	-0.0101336			-0.977175	-0.00701554		-0.977175	0.00721041			4	0.260415			4	0.260415
				-0.97715	0.0040924		-0.97715	-0.00604116			-0.97715	-0.00526165		-0.97715	0.00818479			4	0.211965			4	0.211965
				-0.977125	0.00545653		-0.977125	-0.000389752			-0.977125	-0.00233851		-0.977125	0.00760016			4	0.20619			4	0.20619
				-0.9771	0.00545653		-0.9771	0.00136413			-0.9771	0.000584628		-0.9771	0.0101336			4	0.19689			4	0.19689
				-0.977075	0.00370264		-0.977075	0.00448215			-0.977075	0.00194876		-0.977075	0.0111079			4	0.12289			4	0.12289
				-0.97705	-0.00467702		-0.97705	0.00526165			-0.97705	0.00292314		-0.97705	0.0109131			4	0.06064			4	0.06064
				-0.977025	-0.0109131		-0.977025	0.00584628			-0.977025	-0.00097438		-0.977025	0.00837967			4	0.05924			4	0.05924
				-0.977	-0.00935405		-0.977	0.00214364			-0.977	-0.000194876		-0.977	0.00584628			4	0.04154			4	0.04154
				-0.976975	-0.00779504		-0.976975	-0.00097438			-0.976975	0.00662578		-0.976975	0.00896429			4	0.01084			4	0.01084
				-0.97695	-0.0132516		-0.97695	-0.00389752			-0.97695	0.0122772		-0.97695	0.0132516			4	0.00384			4	0.00384
				-0.976925	-0.0124721		-0.976925	-0.00331289			-0.976925	0.00954892		-0.976925	0.00993867			4	-0.03821			4	-0.03821
				-0.9769	-0.0040924		-0.9769	0.000779504			-0.9769	0.00798992		-0.9769	0.0056514			4	-0.16936			4	-0.16936
				-0.976875	0.00292314		-0.976875	0.00584628			-0.976875	0.00857454		-0.976875	0.0122772			4	-0.265335			4	-0.265335
				-0.97685	-0.00155901		-0.97685	0.00194876			-0.97685	0.00993867		-0.97685	0.0159798			4	-0.31396			4	-0.31396
				-0.976825	-0.00779504		-0.976825	0.000194876			-0.976825	0.00740529		-0.976825	0.0130567			4	-0.38931			4	-0.38931
				-0.9768	-0.00214364		-0.9768	0.00272826			-0.9768	0.0056514		-0.9768	0.00993867			4	-0.42626			4	-0.42626
				-0.976775	-0.00311802		-0.976775	0.00721041			-0.976775	0.0048719		-0.976775	0.00721041			4	-0.46501			4	-0.46501
				-0.97675	-0.00097438		-0.97675	0.0040924			-0.97675	0.00448215		-0.97675	0.00097438			4	-0.47271			4	-0.47271
				-0.976725	-0.00292314		-0.976725	0.00097438			-0.976725	0.00194876		-0.976725	0.00389752			4	-0.48071			4	-0.48071
				-0.9767	0.00428727		-0.9767	-0.00311802			-0.9767	-0.00311802		-0.9767	0.00623603			4	-0.83971			4	-0.83971
				-0.976675	0.00331289		-0.976675	-0.00506678			-0.976675	-0.0040924		-0.976675	0.00798992			3	1.91794			3	1.91794
				-0.97665	0.00545653		-0.97665	-0.00701554			-0.97665	-0.00331289		-0.97665	0.0109131			3	1.90374			3	1.90374
				-0.976625	-0.00214364		-0.976625	-0.00662578			-0.976625	-0.000389752		-0.976625	0.00993867			3	1.86024			3	1.86024
				-0.9766	-0.00311802		-0.9766	-0.00331289			-0.9766	0.00331289		-0.9766	0.00623603			3	1.83014			3	1.83014
				-0.976575	-0.00428727		-0.976575	0.00467702			-0.976575	0.000584628		-0.976575	0.00331289			3	1.72709			3	1.72709
				-0.97655	0.00331289		-0.97655	0.00837967			-0.97655	-0.00272826		-0.97655	0.00097438			3	1.72229			3	1.72229
				-0.976525	0.00993867		-0.976525	0.00915917			-0.976525	-0.00526165		-0.976525	-0.00155901			3	1.70219			3	1.70219
				-0.9765	0.00818479		-0.9765	0.00370264			-0.9765	-0.00526165		-0.9765	-0.00448215			3	1.69432			3	1.69432
				-0.976475	0.00292314		-0.976475	0.00214364			-0.976475	-0.00428727		-0.976475	-0.0107182			3	1.60607			3	1.60607
				-0.97645	0		-0.97645	0.0040924			-0.97645	-0.00116926		-0.97645	-0.0116926			3	1.44754			3	1.44754
				-0.976425	-0.000194876		-0.976425	0.00662578			-0.976425	-0.00370264		-0.976425	-0.00915917			3	1.26459			3	1.26459
				-0.9764	-0.00155901		-0.9764	0.00721041			-0.9764	-0.00993867		-0.9764	-0.00682066			3	1.21459			3	1.21459
				-0.976375	-0.00350777		-0.976375	0.0048719			-0.976375	-0.0161747		-0.976375	-0.00604116			3	1.13109			3	1.13109
				-0.97635	-0.0040924		-0.97635	-0.000779504			-0.97635	-0.0183183		-0.97635	-0.00545653			3	1.11054			3	1.11054
				-0.976325	-0.00311802		-0.976325	-0.00604116			-0.976325	-0.0101336		-0.976325	-0.00428727			3	1.02896			3	1.02896
				-0.9763	-0.00136413		-0.9763	-0.000584628			-0.9763	0.00233851		-0.9763	-0.00876942			3	0.91664			3	0.91664
				-0.976275	0.00194876		-0.976275	0.00350777			-0.976275	0.00818479		-0.976275	-0.0105233			3	0.913115			3	0.913115
				-0.97625	-0.000779504		-0.97625	0.000389752			-0.97625	0.0101336		-0.97625	-0.0111079			3	0.85784			3	0.85784
				-0.976225	-0.00448215		-0.976225	-0.00292314			-0.976225	0.00682066		-0.976225	-0.00779504			3	0.85659			3	0.85659
				-0.9762	-0.00506678		-0.9762	-0.00448215			-0.9762	0.00370264		-0.9762	-0.00798992			3	0.82154			3	0.82154
				-0.976175	-0.00428727		-0.976175	-0.00370264			-0.976175	0.00194876		-0.976175	-0.00954892			3	0.76404			3	0.76404
				-0.97615	0		-0.97615	-0.00350777			-0.97615	-0.00350777		-0.97615	-0.0116926			3	0.74004			3	0.74004
				-0.976125	0.00253339		-0.976125	-0.00389752			-0.976125	-0.00331289		-0.976125	-0.00876942			3	0.707115			3	0.707115
				-0.9761	-0.00292314		-0.9761	-0.00253339			-0.9761	-0.00214364		-0.9761	-0.00467702			3	0.68954			3	0.68954
				-0.976075	-0.0056514		-0.976075	-0.00292314			-0.976075	-0.00116926		-0.976075	0.00155901			3	0.67669			3	0.67669
				-0.97605	0		-0.97605	-0.00526165			-0.97605	0.000194876		-0.97605	0.00175388			3	0.658365			3	0.658365
				-0.976025	0.00740529		-0.976025	-0.0097438			-0.976025	-0.00097438		-0.976025	-0.00428727			3	0.65364			3	0.65364
				-0.976	0.00584628		-0.976	-0.0097438			-0.976	-0.00311802		-0.976	-0.0107182			3	0.61229			3	0.61229
				-0.975975	0.00331289		-0.975975	-0.00662578			-0.975975	-0.00876942		-0.975975	-0.00643091			3	0.55894			3	0.55894
				-0.97595	0.00682066		-0.97595	-0.00272826			-0.97595	-0.0150055		-0.97595	0.00272826			3	0.55819			3	0.55819
				-0.975925	0.00448215		-0.975925	0.000389752			-0.975925	-0.0187081		-0.975925	0.00857454			3	0.55339			3	0.55339
				-0.9759	-0.000194876		-0.9759	0.00097438			-0.9759	-0.0171491		-0.9759	0.0146157			3	0.52459			3	0.52459
				-0.975875	-0.0040924		-0.975875	0.00292314			-0.975875	-0.0140311		-0.975875	0.0134464			3	0.52014			3	0.52014
				-0.97585	-0.00272826		-0.97585	0.00214364			-0.97585	-0.0097438		-0.97585	0.00721041			3	0.50764			3	0.50764
				-0.975825	0.000584628		-0.975825	0.00389752			-0.975825	-0.0097438		-0.975825	-0.00155901			3	0.46704			3	0.46704
				-0.9758	0.00253339		-0.9758	0.0056514			-0.9758	-0.0105233		-0.9758	-0.00760016			3	0.40014			3	0.40014
				-0.975775	0.00350777		-0.975775	0.0048719			-0.975775	-0.0118874		-0.975775	-0.00721041			3	0.35804			3	0.35804
				-0.97575	0.00292314		-0.97575	-0.00097438			-0.97575	-0.00876942		-0.97575	-0.00331289			3	0.34584			3	0.34584
				-0.975725	0.00311802		-0.975725	-0.00292314			-0.975725	-0.00175388		-0.975725	0.00798992			3	0.29439			3	0.29439
				-0.9757	0.00428727		-0.9757	-0.000194876			-0.9757	0.00779504		-0.9757	0.00876942			3	0.28019			3	0.28019
				-0.975675	0.00331289		-0.975675	0.00467702			-0.975675	0.0120823		-0.975675	-0.00116926			3	0.24389			3	0.24389
				-0.97565	0.00311802		-0.97565	0.00253339			-0.97565	0.0120823		-0.97565	-0.0118874			3	0.21099			3	0.21099
				-0.975625	0.000779504		-0.975625	0.00292314			-0.975625	0.00798992		-0.975625	-0.00682066			3	0.15829			3	0.15829
				-0.9756	-0.00194876		-0.9756	0.00214364			-0.9756	0.00448215		-0.9756	0.000389752			3	0.02139			3	0.02139
				-0.975575	-0.00389752		-0.975575	-0.00175388			-0.975575	0.00604116		-0.975575	0.00233851			3	0.01474			3	0.01474
				-0.97555	-0.00331289		-0.97555	-0.0103284			-0.97555	0.00935405		-0.97555	0.00097438			3	-0.23366			3	-0.23366
				-0.975525	-0.00779504		-0.975525	-0.0126669			-0.975525	0.0111079		-0.975525	0.00175388			3	-0.27116			3	-0.27116
				-0.9755	-0.00896429		-0.9755	-0.00448215			-0.9755	0.0136413		-0.9755	0.00389752			3	-0.47381			3	-0.47381
				-0.975475	-0.0105233		-0.975475	0.00857454			-0.975475	0.0132516		-0.975475	0.00331289			3	-0.491435			3	-0.491435
				-0.97545	-0.0107182		-0.97545	0.00876942			-0.97545	0.0128618		-0.97545	0.00136413			3	-0.522685			3	-0.522685
				-0.975425	-0.00798992		-0.975425	0.00740529			-0.975425	0.0107182		-0.975425	-0.00233851			3	-0.58001			3	-0.58001
				-0.9754	-0.00253339		-0.9754	0.000779504			-0.9754	0.00604116		-0.9754	-0.00370264			3	-0.71741			3	-0.71741
				-0.975375	0.0048719		-0.975375	-0.00545653			-0.975375	0.00253339		-0.975375	-0.00331289			3	-0.92636			3	-0.92636
				-0.97535	0.00467702		-0.97535	-0.00604116			-0.97535	-0.000584628		-0.97535	-0.00740529			2	1.98739			2	1.98739
				-0.975325	0.00253339		-0.975325	-0.00116926			-0.975325	-0.00370264		-0.975325	-0.00935405			2	1.66369			2	1.66369
				-0.9753	0.00467702		-0.9753	0.00331289			-0.9753	-0.000779504		-0.9753	-0.0103284			2	1.62439			2	1.62439
				-0.975275	0.00682066		-0.975275	0.00584628			-0.975275	-0.00097438		-0.975275	-0.0048719			2	1.60339			2	1.60339
				-0.97525	0.00740529		-0.97525	0.00311802			-0.97525	0.00467702		-0.97525	-0.00116926			2	1.44814			2	1.44814
				-0.975225	0.00604116		-0.975225	0.000194876			-0.975225	0.00506678		-0.975225	-0.00155901			2	1.43929			2	1.43929
				-0.9752	0.0056514		-0.9752	-0.00116926			-0.9752	0.00760016		-0.9752	-0.00214364			2	1.23139			2	1.23139
				-0.975175	0.00584628		-0.975175	-0.00155901			-0.975175	0.00760016		-0.975175	-0.00253339			2	1.19484			2	1.19484
				-0.97515	0.00526165		-0.97515	-0.00097438			-0.97515	0.00331289		-0.97515	-0.00116926			2	1.17709			2	1.17709
				-0.975125	-0.00175388		-0.975125	0.000779504			-0.975125	-0.00097438		-0.975125	0.00292314			2	1.12729			2	1.12729
				-0.9751	-0.0048719		-0.9751	0.000584628			-0.9751	-0.00370264		-0.9751	0.0056514			2	1.07532			2	1.07532
				-0.975075	-0.00584628		-0.975075	0.000779504			-0.975075	-0.00428727		-0.975075	0.00506678			2	1.05699			2	1.05699
				-0.97505	-0.00155901		-0.97505	0.00136413			-0.97505	-0.00311802		-0.97505	0.00701554			2	0.82784			2	0.82784
				-0.975025	0.00116926		-0.975025	0.000194876			-0.975025	-0.00175388		-0.975025	0.0114977			2	0.821015			2	0.821015
				-0.975	0.00272826		-0.975	-0.00194876			-0.975	0.000194876		-0.975	0.0167593			2	0.80844			2	0.80844
				-0.974975	-0.00116926		-0.974975	-0.0048719			-0.974975	-0.00331289		-0.974975	0.0161747			2	0.65924			2	0.65924
				-0.97495	-0.00311802		-0.97495	-0.00467702			-0.97495	-0.00876942		-0.97495	0.0114977			2	0.60804			2	0.60804
				-0.974925	-0.00467702		-0.974925	-0.00545653			-0.974925	-0.00682066		-0.974925	0.00721041			2	0.46574			2	0.46574
				-0.9749	-0.00350777		-0.9749	-0.0048719			-0.9749	0.00175388		-0.9749	0.00915917			2	0.461465			2	0.461465
				-0.974875	-0.00136413		-0.974875	-0.000779504			-0.974875	0.00311802		-0.974875	0.0146157			2	0.41119			2	0.41119
				-0.97485	0.00233851		-0.97485	0.00272826			-0.97485	0.00272826		-0.97485	0.0175388			2	0.40879			2	0.40879
				-0.974825	0.00350777		-0.974825	0.00623603			-0.974825	-0.00350777		-0.974825	0.0130567			2	0.354865			2	0.354865
				-0.9748	0.0040924		-0.9748	0.00701554			-0.9748	-0.00662578		-0.9748	0.00136413			2	0.33174			2	0.33174
				-0.974775	0.00643091		-0.974775	0.00623603			-0.974775	-0.00448215		-0.974775	-0.00662578			2	0.30964			2	0.30964
				-0.97475	0.00331289		-0.97475	0.00253339			-0.97475	-0.00175388		-0.97475	-0.0146157			2	0.30864			2	0.30864
				-0.974725	0.000194876		-0.974725	0.00097438			-0.974725	0.00623603		-0.974725	-0.0146157			2	0.262215			2	0.262215
				-0.9747	-0.00175388		-0.9747	0.00311802			-0.9747	0.0097438		-0.9747	-0.00837967			2	0.216715			2	0.216715
				-0.974675	0.000779504		-0.974675	0.00526165			-0.974675	0.00643091		-0.974675	-0.00136413			2	0.16374			2	0.16374
				-0.97465	-0.00155901		-0.97465	-0.00272826			-0.97465	0.000194876		-0.97465	0.00467702			2	0.11189			2	0.11189
				-0.974625	-0.00194876		-0.974625	-0.00993867			-0.974625	0.00175388		-0.974625	0.00526165			2	0.09919			2	0.09919
				-0.9746	-0.00155901		-0.9746	-0.00682066			-0.9746	0.00448215		-0.9746	0.00233851			2	0.06254			2	0.06254
				-0.974575	-0.00116926		-0.974575	0.00194876			-0.974575	-0.000389752		-0.974575	-0.00370264			2	0.06094			2	0.06094
				-0.97455	-0.00604116		-0.97455	0.00623603			-0.97455	-0.00389752		-0.97455	-0.00643091			2	0.05174			2	0.05174
				-0.974525	-0.00701554		-0.974525	0.00643091			-0.974525	-0.00506678		-0.974525	0.00116926			2	0.02244			2	0.02244
				-0.9745	-0.00155901		-0.9745	0.00253339			-0.9745	-0.00818479		-0.9745	0.00194876			2	0.012965			2	0.012965
				-0.974475	0.00545653		-0.974475	-0.00194876			-0.974475	-0.00896429		-0.974475	-0.00584628			2	0.00669			2	0.00669
				-0.97445	0.0040924		-0.97445	-0.00214364			-0.97445	-0.0097438		-0.97445	-0.0136413			2	-0.00091			2	-0.00091
				-0.974425	-0.000194876		-0.974425	-0.00448215			-0.974425	-0.00428727		-0.974425	-0.00740529			2	-0.04061			2	-0.04061
				-0.9744	0.00097438		-0.9744	-0.00857454			-0.9744	0.00175388		-0.9744	-0.00272826			2	-0.068035			2	-0.068035
				-0.974375	0		-0.974375	-0.00896429			-0.974375	0.00526165		-0.974375	-0.000779504			2	-0.10316			2	-0.10316
				-0.97435	0.000194876		-0.97435	-0.00253339			-0.97435	0.000389752		-0.97435	0.000584628			2	-0.20666			2	-0.20666
				-0.974325	0.00097438		-0.974325	0.00194876			-0.974325	-0.00760016		-0.974325	0.00272826			2	-0.25496			2	-0.25496
				-0.9743	0.00760016		-0.9743	-0.00311802			-0.9743	-0.0132516		-0.9743	-0.000194876			2	-0.330985			2	-0.330985
				-0.974275	0.0103284		-0.974275	-0.00779504			-0.974275	-0.00876942		-0.974275	0.00116926			2	-0.40781			2	-0.40781
				-0.97425	0.00448215		-0.97425	-0.00389752			-0.97425	-0.00701554		-0.97425	0.00623603			2	-0.44276			2	-0.44276
				-0.974225	-0.00350777		-0.974225	0.00370264			-0.974225	-0.0056514		-0.974225	0.0105233			2	-0.49746			2	-0.49746
				-0.9742	-0.00467702		-0.9742	0.00526165			-0.9742	-0.00721041		-0.9742	0.0118874			2	-0.51116			2	-0.51116
				-0.974175	-0.000779504		-0.974175	0.00623603			-0.974175	0.00116926		-0.974175	0.00662578			2	-0.54201			2	-0.54201
				-0.97415	0.000389752		-0.97415	0.00311802			-0.97415	0.00136413		-0.97415	-0.000584628			2	-0.746535			2	-0.746535
				-0.974125	-0.00292314		-0.974125	-0.00214364			-0.974125	0.00175388		-0.974125	-0.00136413			2	-0.99916			2	-0.99916
				-0.9741	-0.00779504		-0.9741	-0.00116926			-0.9741	0.00175388		-0.9741	-0.000389752			1	1.94109			1	1.94109
				-0.974075	-0.00954892		-0.974075	-0.00116926			-0.974075	0.000389752		-0.974075	0.00292314			1	1.88744			1	1.88744
				-0.97405	-0.00954892		-0.97405	-0.00175388			-0.97405	-0.000389752		-0.97405	-0.00214364			1	1.85207			1	1.85207
				-0.974025	-0.00526165		-0.974025	-0.00292314			-0.974025	0.00214364		-0.974025	-0.00760016			1	1.62629			1	1.62629
				-0.974	-0.000389752		-0.974	-0.00233851			-0.974	0.00584628		-0.974	-0.00915917			1	1.62279			1	1.62279
				-0.973975	0.00506678		-0.973975	0.000584628			-0.973975	0.00545653		-0.973975	-0.00643091			1	1.18629			1	1.18629
				-0.97395	0.00233851		-0.97395	-0.00272826			-0.97395	0.00721041		-0.97395	-0.00623603			1	0.964265			1	0.964265
				-0.973925	-0.00545653		-0.973925	-0.00584628			-0.973925	0.00701554		-0.973925	-0.00837967			1	0.90834			1	0.90834
				-0.9739	-0.00272826		-0.9739	-0.00837967			-0.9739	0.0122772		-0.9739	-0.00876942			1	0.90344			1	0.90344
				-0.973875	0.00214364		-0.973875	-0.00311802			-0.973875	0.00857454		-0.973875	-0.00954892			1	0.90099			1	0.90099
				-0.97385	0.00389752		-0.97385	0.0040924			-0.97385	-0.000194876		-0.97385	-0.00896429			1	0.85864			1	0.85864
				-0.973825	0.0040924		-0.973825	0.0148106			-0.973825	-0.00194876		-0.973825	-0.00896429			1	0.82639			1	0.82639
				-0.9738	0.00701554		-0.9738	0.0128618			-0.9738	0.00272826		-0.9738	-0.0103284			1	0.811765			1	0.811765
				-0.973775	0.00584628		-0.973775	0.00526165			-0.973775	0.00214364		-0.973775	-0.00604116			1	0.721015			1	0.721015
				-0.97375	0.00857454		-0.97375	-0.00311802			-0.97375	-0.000779504		-0.97375	-0.00116926			1	0.70374			1	0.70374
				-0.973725	0.00253339		-0.973725	-0.00818479			-0.973725	-0.00194876		-0.973725	0.00331289			1	0.61739			1	0.61739
				-0.9737	0.00253339		-0.9737	-0.00331289			-0.9737	-0.00253339		-0.9737	0.00370264			1	0.60864			1	0.60864
				-0.973675	-0.00214364		-0.973675	0			-0.973675	-0.00506678		-0.973675	0.00682066			1	0.45294			1	0.45294
				-0.97365	-0.00370264		-0.97365	0.00136413			-0.97365	-0.00915917		-0.97365	0.00623603			1	0.307565			1	0.307565
				-0.973625	-0.00584628		-0.973625	0.00350777			-0.973625	-0.0107182		-0.973625	-0.00311802			1	0.24154			1	0.24154
				-0.9736	-0.00370264		-0.9736	-0.00350777			-0.9736	-0.00818479		-0.9736	-0.0097438			1	0.14959			1	0.14959
				-0.973575	-0.00370264		-0.973575	-0.0111079			-0.973575	-0.00545653		-0.973575	-0.00116926			1	0.077315			1	0.077315
				-0.97355	-0.00623603		-0.97355	-0.00798992			-0.97355	-0.00662578		-0.97355	0.0103284			1	0.066965			1	0.066965
				-0.973525	-0.00876942		-0.973525	0.00097438			-0.973525	-0.00857454		-0.973525	0.0136413			1	0.064565			1	0.064565
				-0.9735	-0.00233851		-0.9735	0.000389752			-0.9735	-0.00993867		-0.9735	0.0161747			1	0.03589			1	0.03589
				-0.973475	0.00662578		-0.973475	-0.000389752			-0.973475	-0.00604116		-0.973475	0.0152003			1	0.017115			1	0.017115
				-0.97345	0.00448215		-0.97345	0.00467702			-0.97345	-0.000779504		-0.97345	0.00954892			1	-0.01281			1	-0.01281
				-0.973425	0.00136413		-0.973425	0.0097438			-0.973425	0.00448215		-0.973425	0.00331289			1	-0.13801			1	-0.13801
				-0.9734	0.00311802		-0.9734	0.00428727			-0.9734	0.00506678		-0.9734	-0.00643091			1	-0.25121			1	-0.25121
				-0.973375	0.0040924		-0.973375	-0.0040924			-0.973375	0.00662578		-0.973375	-0.00272826			1	-0.33381			1	-0.33381
				-0.97335	0.00545653		-0.97335	-0.00233851			-0.97335	0.00506678		-0.97335	-0.000389752			1	-0.47211			1	-0.47211
				-0.973325	0.00740529		-0.973325	0.0048719			-0.973325	0.00526165		-0.973325	-0.00272826			1	-0.68516			1	-0.68516
				-0.9733	0.00545653		-0.9733	0.00233851			-0.9733	0.00584628		-0.9733	-0.0056514			1	-0.72026			1	-0.72026
				-0.973275	0.00331289		-0.973275	-0.00272826			-0.973275	0.0111079		-0.973275	-0.00526165			1	-0.86951			1	-0.86951
				-0.97325	-0.000194876		-0.97325	-0.00272826			-0.97325	0.0134464		-0.97325	-0.0116926
				-0.973225	-0.00350777		-0.973225	0.00097438			-0.973225	0.0111079		-0.973225	-0.00818479
				-0.9732	0.00097438		-0.9732	-0.000389752			-0.9732	0.00857454		-0.9732	-0.00993867
				-0.973175	0.00253339		-0.973175	-0.00370264			-0.973175	0.00253339		-0.973175	-0.00935405
				-0.97315	0.00116926		-0.97315	-0.00292314			-0.97315	0.000584628		-0.97315	-0.00915917
				-0.973125	-0.00116926		-0.973125	0.00097438			-0.973125	0.00584628		-0.973125	-0.00389752
				-0.9731	-0.0056514		-0.9731	-0.000779504			-0.9731	0.0114977		-0.9731	0
				-0.973075	-0.00682066		-0.973075	-0.00428727			-0.973075	0.00662578		-0.973075	-0.000779504
				-0.97305	-0.00350777		-0.97305	-0.00175388			-0.97305	0.00116926		-0.97305	-0.00467702
				-0.973025	-0.00233851		-0.973025	0.00545653			-0.973025	0.00350777		-0.973025	-0.00545653
				-0.973	-0.00389752		-0.973	0.00214364			-0.973	0.00331289		-0.973	-0.00155901
				-0.972975	-0.00292314		-0.972975	-0.00779504			-0.972975	-0.000389752		-0.972975	0.000779504
				-0.97295	-0.00253339		-0.97295	-0.00779504			-0.97295	-0.00389752		-0.97295	-0.000194876
				-0.972925	-0.000584628		-0.972925	-0.00662578			-0.972925	-0.00292314		-0.972925	-0.00253339
				-0.9729	-0.000389752		-0.9729	-0.0116926			-0.9729	-0.00155901		-0.9729	-0.00370264
				-0.972875	0.00545653		-0.972875	-0.0138362			-0.972875	-0.00116926		-0.972875	-0.00253339
				-0.97285	0.00760016		-0.97285	-0.00604116			-0.97285	-0.00136413		-0.97285	-0.0048719
				-0.972825	0.0101336		-0.972825	0.00545653			-0.972825	0.00292314		-0.972825	-0.00604116
				-0.9728	0.0118874		-0.9728	-0.000194876			-0.9728	0.00506678		-0.9728	-0.0109131
				-0.972775	0.0136413		-0.972775	-0.00740529			-0.972775	0.00253339		-0.972775	-0.0103284
				-0.97275	0.0097438		-0.97275	-0.00389752			-0.97275	0.00136413		-0.97275	-0.0107182
				-0.972725	0.00428727		-0.972725	0.00350777			-0.972725	0.00155901		-0.972725	-0.0097438
				-0.9727	0.000779504		-0.9727	0.00331289			-0.9727	0.00292314		-0.9727	-0.00721041
				-0.972675	-0.00448215		-0.972675	0.000779504			-0.972675	0.00292314		-0.972675	-0.00643091
				-0.97265	-0.00740529		-0.97265	0.00604116			-0.97265	0.00370264		-0.97265	-0.00233851
				-0.972625	-0.00935405		-0.972625	0.00857454			-0.972625	0.00837967		-0.972625	0.00526165
				-0.9726	-0.00545653		-0.9726	0.00506678			-0.9726	0.00779504		-0.9726	0.00350777
				-0.972575	-0.000779504		-0.972575	-0.00370264			-0.972575	0.00428727		-0.972575	-0.00136413
				-0.97255	-0.000584628		-0.97255	0.000779504			-0.97255	-0.00311802		-0.97255	-0.00604116
				-0.972525	-0.00350777		-0.972525	0.00837967			-0.972525	-0.00194876		-0.972525	0.00253339
				-0.9725	-0.00604116		-0.9725	-0.000389752			-0.9725	0.00253339		-0.9725	0.0114977
				-0.972475	-0.0114977		-0.972475	-0.00760016			-0.972475	0.00389752		-0.972475	0.0103284
				-0.97245	-0.0128618		-0.97245	0.00233851			-0.97245	0.00915917		-0.97245	0.00604116
				-0.972425	-0.0122772		-0.972425	0.0163696			-0.972425	0.0109131		-0.972425	0.00155901
				-0.9724	-0.0101336		-0.9724	0.00993867			-0.9724	0.0107182		-0.9724	-0.000389752
				-0.972375	-0.00214364		-0.972375	0.00155901			-0.972375	0.00740529		-0.972375	0.00292314
				-0.97235	0.00506678		-0.97235	0.00506678			-0.97235	0.00604116		-0.97235	0.00272826
				-0.972325	0.00857454		-0.972325	0.0097438			-0.972325	0.00506678		-0.972325	0.000584628
				-0.9723	0.00857454		-0.9723	0.00643091			-0.9723	-0.000194876		-0.9723	-0.00116926
				-0.972275	0.00506678		-0.972275	-0.00311802			-0.972275	-0.0048719		-0.972275	0.00097438
				-0.97225	0.00350777		-0.97225	-0.00175388			-0.97225	-0.00915917		-0.97225	0.0056514
				-0.972225	-0.00097438		-0.972225	0.00253339			-0.972225	-0.00526165		-0.972225	0.00876942
				-0.9722	-0.00097438		-0.9722	0.00233851			-0.9722	-0.00506678		-0.9722	0.0097438
				-0.972175	0.0048719		-0.972175	0.00155901			-0.972175	-0.00350777		-0.972175	0.00798992
				-0.97215	0.00428727		-0.97215	0.00623603			-0.97215	-0.00233851		-0.97215	0.00448215
				-0.972125	0.00448215		-0.972125	0.0146157			-0.972125	-0.00272826		-0.972125	0.00116926
				-0.9721	0.00682066		-0.9721	0.0126669			-0.9721	-0.0040924		-0.9721	-0.00136413
				-0.972075	0.0118874		-0.972075	0.00584628			-0.972075	-0.00604116		-0.972075	0.00136413
				-0.97205	0.00760016		-0.97205	-0.00097438			-0.97205	-0.0120823		-0.97205	0.00350777
				-0.972025	0.00331289		-0.972025	-0.00311802			-0.972025	-0.0169542		-0.972025	0.00253339
				-0.972	-0.000194876		-0.972	-0.000584628			-0.972	-0.0142259		-0.972	0.00155901
				-0.971975	-0.00155901		-0.971975	-0.00155901			-0.971975	-0.00837967		-0.971975	-0.000194876
				-0.97195	-0.00175388		-0.97195	-0.00584628			-0.97195	0.000194876		-0.97195	-0.00467702
				-0.971925	-0.00214364		-0.971925	-0.00545653			-0.971925	-0.00350777		-0.971925	-0.00935405
				-0.9719	-0.00350777		-0.9719	-0.000779504			-0.9719	-0.0097438		-0.9719	-0.00837967
				-0.971875	-0.00682066		-0.971875	0.00370264			-0.971875	-0.0056514		-0.971875	0.00155901
				-0.97185	-0.00467702		-0.97185	0.00604116			-0.97185	0		-0.97185	0.00604116
				-0.971825	-0.000584628		-0.971825	0.0101336			-0.971825	-0.00194876		-0.971825	0.00935405
				-0.9718	-0.00272826		-0.9718	0.00721041			-0.9718	-0.00584628		-0.9718	0.00604116
				-0.971775	-0.00136413		-0.971775	-0.00428727			-0.971775	-0.00896429		-0.971775	0
				-0.97175	0.00272826		-0.97175	-0.0118874			-0.97175	-0.00682066		-0.97175	-0.00370264
				-0.971725	0.00857454		-0.971725	-0.0126669			-0.971725	0.000194876		-0.971725	-0.00155901
				-0.9717	0.00740529		-0.9717	-0.00896429			-0.9717	0.00779504		-0.9717	-0.00097438
				-0.971675	0.00760016		-0.971675	-0.00428727			-0.971675	0.00779504		-0.971675	0.00370264
				-0.97165	0.00545653		-0.97165	0.00116926			-0.97165	0.00428727		-0.97165	0.00467702
				-0.971625	0.0056514		-0.971625	0.0056514			-0.971625	0		-0.971625	0.00272826
				-0.9716	0.00467702		-0.9716	0.000389752			-0.9716	-0.00467702		-0.9716	-0.00136413
				-0.971575	0.00467702		-0.971575	-0.0097438			-0.971575	0.00136413		-0.971575	-0.000584628
				-0.97155	0.00721041		-0.97155	-0.0101336			-0.97155	0.0111079		-0.97155	0.00428727
				-0.971525	0.0107182		-0.971525	-0.00584628			-0.971525	0.00954892		-0.971525	0.00876942
				-0.9715	0.0118874		-0.9715	-0.00097438			-0.9715	0.00526165		-0.9715	0.0109131
				-0.971475	0.00779504		-0.971475	0.00233851			-0.971475	0.00253339		-0.971475	0.00876942
				-0.97145	0.00545653		-0.97145	0.00428727			-0.97145	0.00331289		-0.97145	0.00467702
				-0.971425	-0.00331289		-0.971425	0.00779504			-0.971425	0.00097438		-0.971425	0.00331289
				-0.9714	-0.00760016		-0.9714	0.00467702			-0.9714	0.00311802		-0.9714	0.00350777
				-0.971375	-0.018903		-0.971375	0.000584628			-0.971375	0.00116926		-0.971375	0.0056514
				-0.97135	-0.0140311		-0.97135	0.00506678			-0.97135	-0.00253339		-0.97135	0.00954892
				-0.971325	-0.0120823		-0.971325	0.0152003			-0.971325	-0.00136413		-0.971325	0.00779504
				-0.9713	-0.0128618		-0.9713	0.0161747			-0.9713	-0.00876942		-0.9713	0.00526165
				-0.971275	-0.0183183		-0.971275	0.00935405			-0.971275	-0.0138362		-0.971275	0.00233851
				-0.97125	-0.0179286		-0.97125	0.00389752			-0.97125	-0.0183183		-0.97125	-0.000584628
				-0.971225	-0.0130567		-0.971225	-0.00857454			-0.971225	-0.0118874		-0.971225	0.00233851
				-0.9712	-0.0111079		-0.9712	-0.0274775			-0.9712	-0.00643091		-0.9712	0.0056514
				-0.971175	-0.00896429		-0.971175	-0.0434573			-0.971175	-0.00350777		-0.971175	0.00604116
				-0.97115	-0.00662578		-0.97115	-0.0327392			-0.97115	-0.00760016		-0.97115	0.00448215
				-0.971125	-0.000194876		-0.971125	-0.00935405			-0.971125	-0.0113028		-0.971125	0.00331289
				-0.9711	0.00136413		-0.9711	0.000194876			-0.9711	-0.0118874		-0.9711	-0.00721041
				-0.971075	0.00526165		-0.971075	0.00545653			-0.971075	-0.00175388		-0.971075	-0.0136413
				-0.97105	0.00272826		-0.97105	0.00428727			-0.97105	0.0056514		-0.97105	-0.017344
				-0.971025	0.00253339		-0.971025	0.00272826			-0.971025	0.00136413		-0.971025	-0.0128618
				-0.971	0.0048719		-0.971	0.000584628			-0.971	-0.00584628		-0.971	-0.00526165
				-0.970975	0.00584628		-0.970975	-0.00194876			-0.970975	-0.00915917		-0.970975	-0.00175388
				-0.97095	0.00311802		-0.97095	0.000584628			-0.97095	-0.00740529		-0.97095	-0.00506678
				-0.970925	0.00545653		-0.970925	0.00448215			-0.970925	-0.00467702		-0.970925	-0.0105233
				-0.9709	0.00857454		-0.9709	0.00467702			-0.9709	-0.00116926		-0.9709	-0.0142259
				-0.970875	0.00915917		-0.970875	0.00428727			-0.970875	0.00292314		-0.970875	-0.0118874
				-0.97085	0.0040924		-0.97085	0.00760016			-0.97085	0.00175388		-0.97085	-0.00662578
				-0.970825	0.00194876		-0.970825	0.0134464			-0.970825	-0.000389752		-0.970825	-0.0040924
				-0.9708	-0.00272826		-0.9708	0.0113028			-0.9708	-0.00350777		-0.9708	-0.00233851
				-0.970775	-0.00448215		-0.970775	0.00389752			-0.970775	-0.0040924		-0.970775	-0.00311802
				-0.97075	0.00097438		-0.97075	0.00331289			-0.97075	-0.00116926		-0.97075	0
				-0.970725	0.00798992		-0.970725	0.00623603			-0.970725	0.00643091		-0.970725	0.00428727
				-0.9707	0.0048719		-0.9707	0.00350777			-0.9707	0.00798992		-0.9707	0.0056514
				-0.970675	0.00214364		-0.970675	0			-0.970675	0.0048719		-0.970675	0.00623603
				-0.97065	0.00214364		-0.97065	-0.00194876			-0.97065	0.00331289		-0.97065	0.00331289
				-0.970625	0.00253339		-0.970625	-0.000584628			-0.970625	0.00506678		-0.970625	-0.000779504
				-0.9706	0.00097438		-0.9706	-0.00272826			-0.9706	0.0120823		-0.9706	-0.00721041
				-0.970575	-0.00214364		-0.970575	-0.00701554			-0.970575	0.0134464		-0.970575	-0.00837967
				-0.97055	-0.00233851		-0.97055	-0.00604116			-0.97055	0.00837967		-0.97055	-0.00643091
				-0.970525	-0.00175388		-0.970525	-0.00253339			-0.970525	0.00116926		-0.970525	0.000389752
				-0.9705	-0.00233851		-0.9705	-0.00155901			-0.9705	-0.00915917		-0.9705	0.00292314
				-0.970475	-0.00292314		-0.970475	0.000194876			-0.970475	-0.0103284		-0.970475	-0.00331289
				-0.97045	0.00253339		-0.97045	0.00175388			-0.97045	-0.0116926		-0.97045	-0.00604116
				-0.970425	0.00682066		-0.970425	0.00448215			-0.970425	-0.00837967		-0.970425	-0.00175388
				-0.9704	0.00194876		-0.9704	0.0048719			-0.9704	-0.00467702		-0.9704	0.00682066
				-0.970375	-0.00116926		-0.970375	0.00350777			-0.970375	0.000389752		-0.970375	0.00701554
				-0.97035	0.00272826		-0.97035	0.000389752			-0.97035	0.00331289		-0.97035	0.00506678
				-0.970325	0.00643091		-0.970325	-0.00506678			-0.970325	0.00604116		-0.970325	0.00292314
				-0.9703	0.00604116		-0.9703	-0.00604116			-0.9703	0.00740529		-0.9703	0.00136413
				-0.970275	0.00428727		-0.970275	-0.00389752			-0.970275	0.0056514		-0.970275	0.00467702
				-0.97025	0.0048719		-0.97025	-0.00175388			-0.97025	0.00779504		-0.97025	0.00857454
				-0.970225	0.00350777		-0.970225	-0.00116926			-0.970225	0.0097438		-0.970225	0.00857454
				-0.9702	0.00175388		-0.9702	-0.000194876			-0.9702	0.00896429		-0.9702	0.0107182
				-0.970175	-0.000779504		-0.970175	0.00155901			-0.970175	0.0040924		-0.970175	0.0120823
				-0.97015	-0.000584628		-0.97015	0.000779504			-0.97015	0.00194876		-0.97015	0.0120823
				-0.970125	0.000389752		-0.970125	-0.000779504			-0.970125	0.00662578		-0.970125	0.00740529
				-0.9701	-0.00175388		-0.9701	0.000194876			-0.9701	0.00896429		-0.9701	0.00682066
				-0.970075	-0.00506678		-0.970075	0.000779504			-0.970075	0.00097438		-0.970075	0.0109131
				-0.97005	-0.00370264		-0.97005	0.00272826			-0.97005	-0.0107182		-0.97005	0.0128618
				-0.970025	-0.00214364		-0.970025	0.000194876			-0.970025	-0.0116926		-0.970025	0.00662578
				-0.97	-0.00311802		-0.97	-0.00175388			-0.97	-0.00818479		-0.97	0.00428727
				-0.969975	-0.0056514		-0.969975	-0.0048719			-0.969975	0.00097438		-0.969975	0.00760016
				-0.96995	-0.00623603		-0.96995	-0.00311802			-0.96995	0.00682066		-0.96995	0.00935405
				-0.969925	-0.00682066		-0.969925	-0.000584628			-0.969925	0.00292314		-0.969925	0.00818479
				-0.9699	-0.00760016		-0.9699	-0.000389752			-0.9699	-0.00233851		-0.9699	0.00389752
				-0.969875	-0.00760016		-0.969875	0.00175388			-0.969875	-0.00233851		-0.969875	0.000389752
				-0.96985	-0.00428727		-0.96985	0.00253339			-0.96985	-0.0040924		-0.96985	-0.0056514
				-0.969825	0.000779504		-0.969825	0.00136413			-0.969825	-0.00623603		-0.969825	-0.0140311
				-0.9698	-0.00253339		-0.9698	-0.00116926			-0.9698	-0.00526165		-0.9698	-0.0190978
				-0.969775	-0.00526165		-0.969775	-0.00389752			-0.969775	-0.00155901		-0.969775	-0.0118874
				-0.96975	-0.0048719		-0.96975	-0.00701554			-0.96975	0.0048719		-0.96975	-0.00194876
				-0.969725	-0.00272826		-0.969725	-0.00798992			-0.969725	0.00760016		-0.969725	0.00175388
				-0.9697	-0.00604116		-0.9697	-0.00214364			-0.9697	0.00818479		-0.9697	0.00214364
				-0.969675	-0.00818479		-0.969675	0.00526165			-0.969675	0.00896429		-0.969675	-0.000389752
				-0.96965	-0.00272826		-0.96965	0.00155901			-0.96965	0.00662578		-0.96965	-0.00272826
				-0.969625	0.00292314		-0.969625	-0.00428727			-0.969625	0.00682066		-0.969625	-0.00721041
				-0.9696	0		-0.9696	-0.000389752			-0.9696	0.00896429		-0.9696	-0.00857454
				-0.969575	-0.00292314		-0.969575	0.00448215			-0.969575	0.0130567		-0.969575	-0.00643091
				-0.96955	-0.00331289		-0.96955	-0.00272826			-0.96955	0.0144208		-0.96955	-0.00233851
				-0.969525	-0.00253339		-0.969525	-0.00915917			-0.969525	0.00935405		-0.969525	0.00311802
				-0.9695	-0.00623603		-0.9695	-0.00428727			-0.9695	0.00292314		-0.9695	0.00272826
				-0.969475	-0.00506678		-0.969475	0.00389752			-0.969475	0.00253339		-0.969475	-0.00155901
				-0.96945	-0.00116926		-0.96945	0.00311802			-0.96945	0.00155901		-0.96945	-0.00682066
				-0.969425	0.00175388		-0.969425	0.00116926			-0.969425	-0.000779504		-0.969425	-0.0048719
				-0.9694	0.00194876		-0.9694	-0.000194876			-0.9694	-0.00136413		-0.9694	-0.000584628
				-0.969375	0.000194876		-0.969375	-0.000779504			-0.969375	-0.000584628		-0.969375	0.00136413
				-0.96935	0.0048719		-0.96935	-0.000194876			-0.96935	0.00233851		-0.96935	0.000584628
				-0.969325	0.00740529		-0.969325	-0.000584628			-0.969325	0.00253339		-0.969325	-0.000389752
				-0.9693	0.00779504		-0.9693	0.00155901			-0.9693	0.00214364		-0.9693	-0.00389752
				-0.969275	0.00467702		-0.969275	0.00682066			-0.969275	0.00194876		-0.969275	-0.0103284
				-0.96925	0.0040924		-0.96925	0.0056514			-0.96925	0.00194876		-0.96925	-0.0196825
				-0.969225	-0.000584628		-0.969225	0.00448215			-0.969225	0.00389752		-0.969225	-0.0243595
				-0.9692	-0.000194876		-0.9692	0.00740529			-0.9692	-0.000584628		-0.9692	-0.0280621
				-0.969175	-0.00233851		-0.969175	0.00643091			-0.969175	-0.00506678		-0.969175	-0.0243595
				-0.96915	0.00467702		-0.96915	0.00233851			-0.96915	-0.0107182		-0.96915	-0.018903
				-0.969125	0.0111079		-0.969125	-0.00643091			-0.969125	-0.0105233		-0.969125	-0.0118874
				-0.9691	0.0097438		-0.9691	-0.00896429			-0.9691	-0.0146157		-0.9691	-0.00116926
				-0.969075	-0.000584628		-0.969075	-0.00662578			-0.969075	-0.0155901		-0.969075	0.00428727
				-0.96905	-0.00584628		-0.96905	-0.00116926			-0.96905	-0.0114977		-0.96905	0.00623603
				-0.969025	-0.00915917		-0.969025	0.00253339			-0.969025	-0.00194876		-0.969025	0.00155901
				-0.969	-0.00915917		-0.969	0.00194876			-0.969	0.00448215		-0.969	0.00175388
				-0.968975	-0.00935405		-0.968975	0.000194876			-0.968975	0.000584628		-0.968975	0.00993867
				-0.96895	-0.00798992		-0.96895	-0.00311802			-0.96895	-0.00097438		-0.96895	0.0140311
				-0.968925	-0.00623603		-0.968925	-0.00623603			-0.968925	0.0056514		-0.968925	0.0101336
				-0.9689	-0.00584628		-0.9689	-0.000584628			-0.9689	0.0097438		-0.9689	0.00350777
				-0.968875	-0.00389752		-0.968875	0.00526165			-0.968875	0.00506678		-0.968875	0.00194876
				-0.96885	-0.00272826		-0.96885	0.00175388			-0.96885	0.000194876		-0.96885	0.00175388
				-0.968825	0.000779504		-0.968825	-0.00233851			-0.968825	0.00253339		-0.968825	0.000584628
				-0.9688	0.00116926		-0.9688	0.00194876			-0.9688	0.00097438		-0.9688	-0.00194876
				-0.968775	0.0048719		-0.968775	0.0105233			-0.968775	-0.00116926		-0.968775	-0.00350777
				-0.96875	0.00584628		-0.96875	0.00954892			-0.96875	-0.00370264		-0.96875	-0.000389752
				-0.968725	0.00876942		-0.968725	0.00701554			-0.968725	-0.00311802		-0.968725	0.00682066
				-0.9687	0.00311802		-0.9687	0.00662578			-0.9687	0.00350777		-0.9687	0.0132516
				-0.968675	0.000194876		-0.968675	0.00701554			-0.968675	0.00837967		-0.968675	0.0113028
				-0.96865	0.00467702		-0.96865	0.00370264			-0.96865	0.0132516		-0.96865	0.00818479
				-0.968625	0.00526165		-0.968625	0.000389752			-0.968625	0.0114977		-0.968625	0.00779504
				-0.9686	0.00272826		-0.9686	0.00116926			-0.9686	0.00721041		-0.9686	0.00389752
				-0.968575	0.00155901		-0.968575	0.00857454			-0.968575	0.00721041		-0.968575	0
				-0.96855	0.00721041		-0.96855	0.00643091			-0.96855	0.00662578		-0.96855	-0.00389752
				-0.968525	0.0116926		-0.968525	0.00253339			-0.968525	0.0103284		-0.968525	-0.00272826
				-0.9685	0.00857454		-0.9685	0.00506678			-0.9685	0.0136413		-0.9685	0.00155901
				-0.968475	0.00214364		-0.968475	0.00526165			-0.968475	0.00760016		-0.968475	0.00545653
				-0.96845	-0.00389752		-0.96845	-0.00194876			-0.96845	-0.00389752		-0.96845	0.0101336
				-0.968425	-0.00876942		-0.968425	-0.00954892			-0.968425	-0.0132516		-0.968425	0.00935405
				-0.9684	-0.00760016		-0.9684	-0.00331289			-0.9684	-0.0270878		-0.9684	0.00857454
				-0.968375	-0.00506678		-0.968375	0.00682066			-0.968375	-0.0364418		-0.968375	0.00760016
				-0.96835	-0.00389752		-0.96835	0.00779504			-0.96835	-0.0442368		-0.96835	0.00545653
				-0.968325	-0.00175388		-0.968325	0.0048719			-0.968325	-0.0378059		-0.968325	0.0040924
				-0.9683	0.000389752		-0.9683	0.00623603			-0.9683	-0.0374162		-0.9683	0.000194876
				-0.968275	0.00370264		-0.968275	0.00545653			-0.968275	-0.0348828		-0.968275	0.00350777
				-0.96825	0.0056514		-0.96825	0.00194876			-0.96825	-0.0296211		-0.96825	0.00760016
				-0.968225	0.00506678		-0.968225	-0.00448215			-0.968225	-0.0177337		-0.968225	0.00643091
				-0.9682	0.00350777		-0.9682	0			-0.9682	-0.00662578		-0.9682	0.00584628
				-0.968175	0.000389752		-0.968175	0.0048719			-0.968175	-0.00214364		-0.968175	0.00682066
				-0.96815	-0.00331289		-0.96815	-0.00253339			-0.96815	0.00350777		-0.96815	0.00448215
				-0.968125	-0.00643091		-0.968125	-0.0128618			-0.968125	0.00662578		-0.968125	0.00428727
				-0.9681	-0.00584628		-0.9681	-0.00954892			-0.9681	0.0109131		-0.9681	0.00331289
				-0.968075	-0.0040924		-0.968075	-0.00292314			-0.968075	0.0107182		-0.968075	0.000584628
				-0.96805	-0.00370264		-0.96805	-0.00233851			-0.96805	0.0138362		-0.96805	-0.00370264
				-0.968025	-0.00214364		-0.968025	-0.0048719			-0.968025	0.0150055		-0.968025	-0.00876942
				-0.968	-0.00331289		-0.968	-0.00155901			-0.968	0.0138362		-0.968	-0.0132516
				-0.967975	-0.00370264		-0.967975	0.00233851			-0.967975	0.00954892		-0.967975	-0.0107182
				-0.96795	-0.00136413		-0.96795	0.000389752			-0.96795	0.00136413		-0.96795	-0.00915917
				-0.967925	0.00116926		-0.967925	-0.00526165			-0.967925	-0.00721041		-0.967925	-0.0130567
				-0.9679	-0.00136413		-0.9679	-0.00331289			-0.9679	-0.00935405		-0.9679	-0.0128618
				-0.967875	-0.0040924		-0.967875	-0.00155901			-0.967875	-0.00253339		-0.967875	-0.0103284
				-0.96785	-0.000389752		-0.96785	-0.00175388			-0.96785	0.00175388		-0.96785	-0.00331289
				-0.967825	0.00448215		-0.967825	-0.00272826			-0.967825	-0.00214364		-0.967825	-0.000584628
				-0.9678	0.00682066		-0.9678	-0.00175388			-0.9678	-0.00428727		-0.9678	0.00136413
				-0.967775	0.00643091		-0.967775	0.00272826			-0.967775	0.00292314		-0.967775	0.00097438
				-0.96775	0.00233851		-0.96775	0.00214364			-0.96775	0.0116926		-0.96775	0.00428727
				-0.967725	-0.00311802		-0.967725	-0.000389752			-0.967725	0.0142259		-0.967725	0.00779504
				-0.9677	0.000194876		-0.9677	-0.000389752			-0.9677	0.0113028		-0.9677	0.00896429
				-0.967675	0.00155901		-0.967675	0.00253339			-0.967675	0.0109131		-0.967675	0.0040924
				-0.96765	0.00370264		-0.96765	0.00194876			-0.96765	0.00993867		-0.96765	0.000779504
				-0.967625	0.00350777		-0.967625	-0.000584628			-0.967625	0.0146157		-0.967625	0.000779504
				-0.9676	0.00331289		-0.9676	0.000194876			-0.9676	0.00837967		-0.9676	0.00097438
				-0.967575	0.00233851		-0.967575	0.0040924			-0.967575	0.00370264		-0.967575	-0.00272826
				-0.96755	-0.000194876		-0.96755	0.000779504			-0.96755	-0.000194876		-0.96755	-0.00448215
				-0.967525	-0.00116926		-0.967525	-0.00136413			-0.967525	0.00837967		-0.967525	-0.00448215
				-0.9675	-0.00097438		-0.9675	0.000584628			-0.9675	0.0130567		-0.9675	-0.00506678
				-0.967475	0.00155901		-0.967475	0.00253339			-0.967475	0.0116926		-0.967475	-0.0040924
				-0.96745	0.00194876		-0.96745	-0.00116926			-0.96745	0.00448215		-0.96745	-0.00370264
				-0.967425	0		-0.967425	-0.00935405			-0.967425	0.00272826		-0.967425	-0.00428727
				-0.9674	-0.00370264		-0.9674	-0.00935405			-0.9674	0.000194876		-0.9674	-0.00272826
				-0.967375	-0.00604116		-0.967375	-0.0048719			-0.967375	-0.00214364		-0.967375	0.000584628
				-0.96735	-0.00448215		-0.96735	-0.00253339			-0.96735	-0.00818479		-0.96735	0.00662578
				-0.967325	0.00194876		-0.967325	-0.00253339			-0.967325	-0.00682066		-0.967325	0.00662578
				-0.9673	0.00155901		-0.9673	-0.00428727			-0.9673	0.00116926		-0.9673	0.00448215
				-0.967275	0.00233851		-0.967275	-0.00389752			-0.967275	0.00876942		-0.967275	0.00740529
				-0.96725	-0.000194876		-0.96725	-0.000779504			-0.96725	0.0140311		-0.96725	0.0056514
				-0.967225	-0.000779504		-0.967225	0.000584628			-0.967225	0.0107182		-0.967225	0.00467702
				-0.9672	0.00194876		-0.9672	-0.00272826			-0.9672	0.00857454		-0.9672	0.000779504
				-0.967175	0.00292314		-0.967175	-0.00545653			-0.967175	0.00467702		-0.967175	-0.00428727
				-0.96715	0.000389752		-0.96715	-0.00136413			-0.96715	0.00350777		-0.96715	-0.0040924
				-0.967125	-0.00370264		-0.967125	0.00370264			-0.967125	0.00467702		-0.967125	-0.00097438
				-0.9671	-0.000389752		-0.9671	0.00448215			-0.9671	0.0040924		-0.9671	0.00448215
				-0.967075	0.00253339		-0.967075	0.00526165			-0.967075	0.00331289		-0.967075	0.00292314
				-0.96705	0.00350777		-0.96705	0.00428727			-0.96705	0.00214364		-0.96705	0.00175388
				-0.967025	0.00331289		-0.967025	0.00116926			-0.967025	0.000779504		-0.967025	0.00175388
				-0.967	0.00448215		-0.967	-0.00116926			-0.967	0.00214364		-0.967	0.00721041
				-0.966975	0.00701554		-0.966975	-0.00214364			-0.966975	-0.00214364		-0.966975	0.00993867
				-0.96695	0.00194876		-0.96695	0.000584628			-0.96695	-0.00526165		-0.96695	0.0130567
				-0.966925	-0.00311802		-0.966925	0.00448215			-0.966925	-0.00448215		-0.966925	0.00954892
				-0.9669	-0.00584628		-0.9669	0.00604116			-0.9669	-0.00896429		-0.9669	0.00798992
				-0.966875	-0.00545653		-0.966875	0.00623603			-0.966875	-0.0124721		-0.966875	0.00448215
				-0.96685	-0.00175388		-0.96685	0.00175388			-0.96685	-0.0150055		-0.96685	-0.00214364
				-0.966825	0.00097438		-0.966825	-0.00370264			-0.966825	-0.00993867		-0.966825	-0.00682066
				-0.9668	-0.000779504		-0.9668	-0.00370264			-0.9668	-0.00604116		-0.9668	-0.00779504
				-0.966775	-0.00272826		-0.966775	-0.00272826			-0.966775	-0.00428727		-0.966775	-0.00643091
				-0.96675	-0.00116926		-0.96675	-0.00311802			-0.96675	-0.00116926		-0.96675	-0.00311802
				-0.966725	0.000584628		-0.966725	-0.00292314			-0.966725	0.00915917		-0.966725	-0.00292314
				-0.9667	0.00233851		-0.9667	-0.00272826			-0.9667	0.0138362		-0.9667	-0.00214364
				-0.966675	0.00214364		-0.966675	-0.00194876			-0.966675	0.0109131		-0.966675	0.000584628
				-0.96665	0.000194876		-0.96665	0.00097438			-0.96665	0.00389752		-0.96665	0.00253339
				-0.966625	-0.000584628		-0.966625	0.00350777			-0.966625	0.00116926		-0.966625	0
				-0.9666	-0.00097438		-0.9666	0.00214364			-0.9666	0		-0.9666	-0.00467702
				-0.966575	0.00350777		-0.966575	0.00233851			-0.966575	0.00389752		-0.966575	-0.00370264
				-0.96655	0.00740529		-0.96655	0.00662578			-0.96655	0.00389752		-0.96655	0.000584628
				-0.966525	0.0111079		-0.966525	0.0103284			-0.966525	0.00545653		-0.966525	-0.000389752
				-0.9665	0.00623603		-0.9665	0.00623603			-0.9665	0.00545653		-0.9665	0.00389752
				-0.966475	0.00155901		-0.966475	-0.000779504			-0.966475	0.00370264		-0.966475	0.00428727
				-0.96645	0.000584628		-0.96645	-0.00584628			-0.96645	0.00467702		-0.96645	0.00779504
				-0.966425	0.00370264		-0.966425	-0.00857454			-0.966425	0.00623603		-0.966425	0.00993867
				-0.9664	0.00526165		-0.9664	-0.00662578			-0.9664	0.0101336		-0.9664	0.00954892
				-0.966375	0.00350777		-0.966375	-0.00136413			-0.966375	0.00740529		-0.966375	0.00233851
				-0.96635	0.00136413		-0.96635	0.000194876			-0.96635	0.0048719		-0.96635	-0.00721041
				-0.966325	-0.000389752		-0.966325	0.00311802			-0.966325	0.00448215		-0.966325	-0.0114977
				-0.9663	0		-0.9663	0.00311802			-0.9663	0.000779504		-0.9663	-0.0101336
				-0.966275	-0.00097438		-0.966275	0.000779504			-0.966275	-0.00253339		-0.966275	-0.00584628
				-0.96625	-0.00116926		-0.96625	-0.00350777			-0.96625	-0.0103284		-0.96625	-0.00194876
				-0.966225	-0.000194876		-0.966225	-0.00760016			-0.966225	-0.00584628		-0.966225	0.000779504
				-0.9662	-0.000194876		-0.9662	-0.00545653			-0.9662	-0.00155901		-0.9662	0
				-0.966175	-0.000779504		-0.966175	-0.00370264			-0.966175	-0.00155901		-0.966175	-0.00292314
				-0.96615	0.00097438		-0.96615	-0.00467702			-0.96615	-0.00389752		-0.96615	-0.00662578
				-0.966125	0.00389752		-0.966125	-0.00448215			-0.966125	-0.000779504		-0.966125	-0.00526165
				-0.9661	0.00194876		-0.9661	-0.00253339			-0.9661	-0.000389752		-0.9661	0.000584628
				-0.966075	-0.00311802		-0.966075	0.00155901			-0.966075	-0.000779504		-0.966075	0.00526165
				-0.96605	-0.0113028		-0.96605	0.00097438			-0.96605	-0.00798992		-0.96605	0.0097438
				-0.966025	-0.0150055		-0.966025	-0.00097438			-0.966025	-0.0132516		-0.966025	0.00857454
				-0.966	-0.0103284		-0.966	-0.00097438			-0.966	-0.0171491		-0.966	0.00721041
				-0.965975	0.00097438		-0.965975	0.00253339			-0.965975	-0.0097438		-0.965975	0.00662578
				-0.96595	0.00292314		-0.96595	0.00837967			-0.96595	-0.00526165		-0.96595	0.00370264
				-0.965925	0.00292314		-0.965925	0.0114977			-0.965925	-0.00389752		-0.965925	0
				-0.9659	0.00155901		-0.9659	0.00467702			-0.9659	-0.00701554		-0.9659	-0.0048719
				-0.965875	-0.000779504		-0.965875	-0.00331289			-0.965875	-0.00935405		-0.965875	-0.00954892
				-0.96585	0.000389752		-0.96585	-0.00155901			-0.96585	-0.0153952		-0.96585	-0.00857454
				-0.965825	0.000194876		-0.965825	0.00097438			-0.965825	-0.0161747		-0.965825	-0.00818479
				-0.9658	0.00155901		-0.9658	0.00233851			-0.9658	-0.0105233		-0.9658	-0.00370264
				-0.965775	-0.00136413		-0.965775	0.00155901			-0.965775	-0.000194876		-0.965775	-0.00233851
				-0.96575	-0.00428727		-0.96575	-0.00331289			-0.96575	0.00604116		-0.96575	0.000389752
				-0.965725	-0.00682066		-0.965725	-0.00740529			-0.965725	0.00623603		-0.965725	0.000779504
				-0.9657	-0.00701554		-0.9657	-0.0048719			-0.9657	0.00233851		-0.9657	-0.00116926
				-0.965675	-0.00721041		-0.965675	-0.000194876			-0.965675	-0.00526165		-0.965675	-0.00662578
				-0.96565	-0.00116926		-0.96565	0.00311802			-0.96565	-0.00935405		-0.96565	-0.0132516
				-0.965625	0.00798992		-0.965625	0.00350777			-0.965625	-0.00545653		-0.965625	-0.0134464
				-0.9656	0.0118874		-0.9656	-0.00253339			-0.9656	0.00214364		-0.9656	-0.0167593
				-0.965575	0.0136413		-0.965575	-0.00837967			-0.965575	0.00428727		-0.965575	-0.0259185
				-0.96555	0.0114977		-0.96555	-0.00837967			-0.96555	0.00506678		-0.96555	-0.0296211
				-0.965525	0.00604116		-0.965525	-0.0040924			-0.965525	0.00604116		-0.965525	-0.0214364
				-0.9655	-0.00331289		-0.9655	-0.00136413			-0.9655	0.0105233		-0.9655	-0.0109131
				-0.965475	-0.0148106		-0.965475	-0.00467702			-0.965475	0.0124721		-0.965475	-0.00935405
				-0.96545	-0.0136413		-0.96545	-0.00896429			-0.96545	0.00740529		-0.96545	-0.0113028
				-0.965425	-0.0103284		-0.965425	-0.0130567			-0.965425	0.00526165		-0.965425	-0.0124721
				-0.9654	-0.0097438		-0.9654	-0.00896429			-0.9654	0.0097438		-0.9654	-0.0118874
				-0.965375	-0.00993867		-0.965375	-0.00214364			-0.965375	0.0132516		-0.965375	-0.00701554
				-0.96535	-0.00896429		-0.96535	0.00097438			-0.96535	0.00798992		-0.96535	-0.000584628
				-0.965325	-0.00545653		-0.965325	0.00155901			-0.965325	-0.00643091		-0.965325	0.000779504
				-0.9653	-0.00116926		-0.9653	-0.00116926			-0.9653	-0.00818479		-0.9653	0.00292314
				-0.965275	0.00175388		-0.965275	-0.0048719			-0.965275	0		-0.965275	0.00292314
				-0.96525	0.00389752		-0.96525	-0.00272826			-0.96525	0.00760016		-0.96525	0.00506678
				-0.965225	0.00526165		-0.965225	0.000779504			-0.965225	0.00876942		-0.965225	0.00623603
				-0.9652	0.00584628		-0.9652	0.00311802			-0.9652	0.00760016		-0.9652	0.0101336
				-0.965175	0.00896429		-0.965175	0.00389752			-0.965175	0.00701554		-0.965175	0.00701554
				-0.96515	0.0128618		-0.96515	0.00253339			-0.96515	0.00370264		-0.96515	0.000194876
[truncated: 118,606 more rows]
[truncated: 7 more columns]

## Sheet: Fig.7
Fig.7k			Fig.7l
Non-ischemic area	Ischemic area		Non-ischemic area	Ischemic area
0.078	0.274		0.095	0.452
0.064	0.243		0.054	0.561
0.032	0.167		0.015	0.389
0.022	0.206		0.034	0.496
0.047	0.145		0.062	0.357
0.056	0.269		0.071	0.498
0.059	0.314		0.031	0.322
0.032	0.292		0.026	0.457
0.041	0.261		0.011	0.387
0.067	0.325		0.017	0.422
Fig.7n

## Sheet: Fig.8
Fig.8a
Time spent on left paw relative to right paw (%)
Days after stroke	Sham					Stroke					Stroke + AAV-Scr + Cotadutide + RGFP966					Stroke + AAV-ATAD3A K134E + Cotadutide + RGFP966
0	0.2	0	0.39	0	0	0.09	0	0	0	0	0	0.58	0	0.09	0	0.67	0	0	0.19	0
4	2	3	2.3	3.2	2.2	33	29.89	27.34	31.98	31.18	29	26.4	26.31	31.91	31.04	29.67	26.07	26.95	31.04	31.04
12	2	1.3	1.2	3.4	3.5	26.22	23.13	26.19	29.99	23.33	16.67	15	19	19.22	14.44	14.23	22	22.67	23	24.33
19	3.4	3.6	3.7	3.8	3.6	25.28	29.34	27.55	29.94	28.89	13.33	15.34	14	17	11.23	19.22	20.5	20.5	22.67	20.33
26	1.5	1.2	3.9	3.1	2.3	24.48	25.54	24.56	23.96	18.55	10.56	14.45	13.67	12.32	10.33	16.15	16	16.5	20.23	18.67
33	1.5	5.21	1.91	2.7	2.4	22	21	23.33	24	19.67	10.27	15	14.22	9.56	13.67	17.05	15.67	16	14	16
Fig.8b
ΔF/F (%)
Time (s)	Sham			Stroke			Stroke + AAV-Scr + Cotadutide + RGFP966			Stroke + AAV-ATAD3A K134E + Cotadutide + RGFP966
-1	0.057215	-0.0578	0.17223	0.088102	0.048215	0.127989	0.078215	-0.04854	0.204968	0.137385	-0.04021	0.314986
-0.96667	0.144715	0.058476	0.230954	0.039954	-0.00076	0.080666	-0.0249	-0.12354	0.073749	0.13305	-0.04958	0.315684
-0.93333	0.161586	0.090487	0.232684	0.027739	0.000381	0.055096	-0.08324	-0.13677	-0.0297	0.136373	-0.04512	0.317869
-0.9	0.151236	0.108484	0.193989	0.042216	0.006592	0.07784	-0.10066	-0.12783	-0.07349	0.123561	-0.07189	0.319014
-0.86667	0.200711	0.150595	0.250827	-0.02204	-0.09472	0.050633	-0.14144	-0.2018	-0.08108	0.117302	-0.04946	0.284068
-0.83333	0.159827	0.124816	0.194838	-0.07562	-0.15748	0.006249	-0.20337	-0.31096	-0.09578	0.113952	-0.03505	0.262959
-0.8	0.108027	0.070713	0.145341	-0.04319	-0.11704	0.030659	-0.22467	-0.37038	-0.07895	0.084202	-0.0449	0.213303
-0.76667	0.087411	0.019305	0.155517	-0.04623	-0.11928	0.026817	-0.27726	-0.43821	-0.11631	0.09344	-0.00364	0.190521
-0.73333	0.082761	0.02115	0.144373	-0.05401	-0.0831	-0.02492	-0.32502	-0.51742	-0.13262	0.03387	-0.02277	0.090512
-0.7	0.02673	-0.05778	0.111239	-0.06377	-0.09318	-0.03436	-0.32971	-0.56744	-0.09197	-0.035	-0.07875	0.008756
-0.66667	-0.00737	-0.09809	0.083344	-0.05076	-0.0946	-0.00692	-0.36949	-0.61183	-0.12715	-0.07743	-0.15321	-0.00166
-0.63333	-0.00408	-0.11386	0.105706	-0.11106	-0.1175	-0.10462	-0.37016	-0.62511	-0.11521	-0.069	-0.15316	0.015155
-0.6	-0.0206	-0.17616	0.134963	-0.12358	-0.17326	-0.07391	-0.37197	-0.61258	-0.13136	-0.10065	-0.20399	0.002689
-0.56667	-0.00928	-0.19415	0.175583	-0.07077	-0.12668	-0.01485	-0.35692	-0.58347	-0.13037	-0.09543	-0.19732	0.006457
-0.53333	0.040366	-0.11924	0.199975	-0.03191	-0.12284	0.059025	-0.37723	-0.60309	-0.15137	-0.11467	-0.24413	0.014789
-0.5	0.11579	-0.03242	0.264003	-0.03485	-0.16884	0.09915	-0.32697	-0.53499	-0.11895	-0.14216	-0.25953	-0.02479
-0.46667	0.087195	-0.04636	0.22075	0.011149	-0.14576	0.168062	-0.33284	-0.49436	-0.17132	-0.19342	-0.30842	-0.07842
-0.43333	0.107848	0.025781	0.189915	0.038833	-0.05858	0.136244	-0.29246	-0.41855	-0.16638	-0.23923	-0.37672	-0.10173
-0.4	0.134148	0.108885	0.15941	0.013767	-0.05707	0.0846	-0.27217	-0.38524	-0.1591	-0.22953	-0.36405	-0.09502
-0.36667	0.093784	0.080024	0.107544	0.014038	-0.04262	0.070691	-0.25791	-0.30368	-0.21214	-0.19272	-0.31057	-0.07488
-0.33333	0.041399	0.008264	0.074533	0.017471	-0.04163	0.076569	-0.1908	-0.24613	-0.13548	-0.13712	-0.2474	-0.02685
-0.3	0.073725	0.015035	0.132415	0.043295	-0.06033	0.146923	-0.06351	-0.13071	0.003697	-0.09027	-0.21024	0.029691
-0.26667	0.035013	-0.03718	0.107205	0.05768	-0.03491	0.150271	0.024091	-0.06815	0.116336	-0.01392	-0.11943	0.091593
-0.23333	-0.04255	-0.10335	0.018257	0.061962	0.048945	0.074978	0.139801	-0.06254	0.342142	0.02112	-0.08221	0.124454
-0.2	-0.11598	-0.17863	-0.05334	0.051203	-0.01554	0.117941	0.31047	0.082729	0.538212	0.092757	0.022715	0.162799
-0.16667	-0.18908	-0.25402	-0.12415	0.048512	-0.03332	0.13035	0.436778	0.20437	0.669187	0.075706	-0.00427	0.155678
-0.13333	-0.29088	-0.34457	-0.2372	0.016191	-0.059	0.091381	0.574743	0.303211	0.846274	0.083463	0.013613	0.153313
-0.1	-0.31887	-0.40031	-0.23743	-0.00581	-0.09302	0.081401	0.70878	0.391196	1.02636	0.083209	0.018695	0.147724
-0.06667	-0.29428	-0.43033	-0.15823	0.038736	-0.0842	0.16167	0.866142	0.568827	1.16346	0.135098	0.053606	0.216591
-0.03333	-0.30019	-0.51305	-0.08733	0.059164	-0.07596	0.194288	1.01391	0.668789	1.35904	0.138116	0.026804	0.249429
0	-0.31631	-0.5958	-0.03682	0.063583	-0.04612	0.17329	1.13977	0.696641	1.58289	0.127968	-0.00756	0.263491
0.033333	-0.26278	-0.63627	0.110717	0.049394	-0.09401	0.1928	1.26266	0.766075	1.75926	0.093959	-0.03484	0.222755
0.066667	-0.262	-0.63189	0.107891	-0.00737	-0.13211	0.11738	1.42443	0.818484	2.03038	0.08258	-0.05988	0.225043
0.1	-0.31285	-0.67981	0.054117	-0.11132	-0.17381	-0.04883	1.60822	0.878387	2.33805	0.032139	-0.17155	0.235827
0.133333	-0.3023	-0.68851	0.083918	-0.18802	-0.26223	-0.1138	1.75572	0.975005	2.53644	-0.02831	-0.2445	0.187882
0.166667	-0.31219	-0.69016	0.065788	-0.18016	-0.25349	-0.10683	1.93215	1.13331	2.731	-0.03704	-0.25278	0.178698
0.2	-0.35423	-0.70174	-0.00672	-0.1874	-0.22712	-0.14768	2.08334	1.18369	2.98298	-0.06816	-0.29223	0.15591
0.233333	-0.29506	-0.67048	0.080367	-0.16779	-0.20215	-0.13343	2.18149	1.24715	3.11583	-0.1035	-0.38286	0.17586
0.266667	-0.27586	-0.69956	0.147836	-0.15378	-0.1799	-0.12766	2.25903	1.3092	3.20886	-0.09335	-0.39767	0.210976
0.3	-0.28771	-0.72483	0.149405	-0.17997	-0.25136	-0.10858	2.3504	1.32701	3.3738	-0.08756	-0.40292	0.227795
0.333333	-0.21992	-0.66781	0.227962	-0.24383	-0.3399	-0.14775	2.41215	1.31837	3.50593	-0.06969	-0.39017	0.250788
0.366667	-0.16929	-0.64188	0.303304	-0.27309	-0.36546	-0.18072	2.47088	1.36206	3.57971	-0.07193	-0.43461	0.290746
0.4	-0.21608	-0.68195	0.249785	-0.33553	-0.47173	-0.19932	2.54488	1.41967	3.67009	-0.00182	-0.38444	0.380793
0.433333	-0.18266	-0.58426	0.218936	-0.34958	-0.54023	-0.15894	2.55808	1.383	3.73317	-0.00199	-0.38856	0.384575
0.466667	-0.11649	-0.4829	0.249911	-0.34548	-0.52545	-0.16551	2.54202	1.36123	3.72281	0.034787	-0.32956	0.399135
0.5	-0.07458	-0.40289	0.25373	-0.37653	-0.55783	-0.19524	2.47791	1.23745	3.71838	0.018543	-0.36631	0.403398
0.533333	-0.04994	-0.34711	0.247227	-0.4331	-0.62245	-0.24375	2.40823	1.11655	3.69992	0.047398	-0.31541	0.410207
0.566667	-0.03027	-0.36566	0.305126	-0.42452	-0.5631	-0.28594	2.38466	1.04564	3.72369	0.006365	-0.34565	0.35838
0.6	-0.03291	-0.40124	0.335431	-0.44168	-0.54621	-0.33714	2.39196	0.995403	3.78852	-0.04905	-0.3964	0.298293
0.633333	-0.05292	-0.42603	0.320186	-0.44447	-0.57633	-0.31262	2.38776	0.953523	3.82199	-0.16321	-0.51964	0.193214
0.666667	-0.06582	-0.44091	0.30927	-0.44409	-0.57999	-0.3082	2.44443	0.986582	3.90228	-0.2105	-0.53849	0.117481
0.7	-0.03559	-0.40043	0.329239	-0.40817	-0.5181	-0.29823	2.57645	1.06441	4.08849	-0.30495	-0.60853	-0.00136
0.733333	-0.03657	-0.36626	0.293128	-0.39503	-0.46653	-0.32354	2.67164	1.11554	4.22774	-0.34122	-0.63063	-0.05182
0.766667	-0.03524	-0.32745	0.256972	-0.41815	-0.42697	-0.40933	2.72193	1.13007	4.3138	-0.30673	-0.57626	-0.03721
0.8	-0.02218	-0.29226	0.247903	-0.43487	-0.47543	-0.39431	2.78997	1.0975	4.48243	-0.20446	-0.4527	0.043776
0.833333	-0.00946	-0.26685	0.247924	-0.3735	-0.41688	-0.33013	2.91464	1.19841	4.63087	-0.17918	-0.39255	0.034189
0.866667	-0.03119	-0.28097	0.218576	-0.33267	-0.38153	-0.2838	3.01708	1.25632	4.77783	-0.11913	-0.33728	0.099015
0.9	-0.00463	-0.24301	0.233755	-0.32912	-0.46573	-0.19251	3.00789	1.17809	4.83769	-0.07039	-0.26769	0.126915
0.933333	-0.01056	-0.25255	0.23143	-0.28358	-0.51303	-0.05412	3.07502	1.18966	4.96038	-0.0689	-0.30174	0.163945
0.966667	-0.01308	-0.24737	0.221213	-0.24816	-0.53787	0.041554	3.19813	1.30818	5.08808	-0.06888	-0.35953	0.221778
1	-0.02165	-0.21619	0.172881	-0.22993	-0.56944	0.109584	3.25446	1.31386	5.19506	-0.00788	-0.35143	0.335679
1.03333	-0.03363	-0.17992	0.112663	-0.18365	-0.53984	0.172532	3.22549	1.26169	5.1893	0.063225	-0.36443	0.490884
1.06667	-0.06965	-0.2155	0.076202	-0.1355	-0.50208	0.231073	3.28232	1.27301	5.29164	0.102305	-0.37341	0.578017
1.1	-0.07642	-0.22666	0.073821	-0.11871	-0.44207	0.204648	3.29905	1.26411	5.33398	0.167802	-0.37755	0.713157
1.13333	-0.03903	-0.18133	0.10326	-0.07197	-0.38379	0.239856	3.29672	1.23297	5.36047	0.187339	-0.41716	0.791843
1.16667	0.00925	-0.16188	0.180377	-0.06844	-0.34719	0.210301	3.28483	1.17787	5.39179	0.240008	-0.4458	0.925813
1.2	0.106237	-0.09923	0.311702	-0.07224	-0.31513	0.170644	3.28669	1.11516	5.45822	0.32953	-0.41956	1.07862
1.23333	0.234133	0.005791	0.462475	-0.04492	-0.2594	0.169564	3.31326	1.16363	5.4629	0.456029	-0.36575	1.2778
1.26667	0.445528	0.132282	0.758774	0.029296	-0.1884	0.246987	3.33554	1.13809	5.53299	0.556429	-0.33071	1.44357
1.3	0.679982	0.256036	1.10393	-0.00326	-0.17863	0.172111	3.29556	1.10514	5.48597	0.654677	-0.30529	1.61465
1.33333	0.947815	0.379657	1.51597	-0.05144	-0.17418	0.0713	3.30316	1.1589	5.44743	0.744967	-0.23226	1.72219
1.36667	1.1388	0.451444	1.82615	-0.08216	-0.21036	0.046034	3.37587	1.32176	5.42997	0.818777	-0.16579	1.80335
1.4	1.31906	0.522082	2.11603	-0.10611	-0.23718	0.024954	3.42336	1.37084	5.47588	0.854361	-0.09822	1.80694
1.43333	1.49788	0.594477	2.40127	-0.21637	-0.2855	-0.14725	3.45987	1.49083	5.42891	0.864468	-0.05596	1.7849
1.46667	1.71405	0.701545	2.72655	-0.24245	-0.30248	-0.18242	3.54707	1.60888	5.48526	0.869132	-0.01452	1.75279
1.5	1.87652	0.79882	2.95423	-0.26919	-0.29456	-0.24382	3.58216	1.63099	5.53333	0.840598	-0.06189	1.74309
1.53333	2.12638	0.969972	3.28278	-0.33772	-0.36162	-0.31381	3.56373	1.578	5.54945	0.806473	-0.11847	1.73142
1.56667	2.39171	1.18452	3.59891	-0.41427	-0.5092	-0.31933	3.5331	1.56503	5.50117	0.76169	-0.17317	1.69655
1.6	2.68483	1.43414	3.93552	-0.41128	-0.52835	-0.29422	3.53795	1.51785	5.55803	0.715284	-0.25556	1.68613
1.63333	2.86853	1.54397	4.19308	-0.43134	-0.56993	-0.29276	3.57432	1.52811	5.62054	0.720152	-0.28477	1.72507
1.66667	3.03763	1.68508	4.39018	-0.44091	-0.63518	-0.24663	3.68683	1.63769	5.73598	0.737456	-0.27194	1.74685
1.7	3.08543	1.72891	4.44196	-0.407	-0.62064	-0.19335	3.78079	1.7516	5.80999	0.746545	-0.27868	1.77177
1.73333	3.17528	1.78531	4.56524	-0.38042	-0.59716	-0.16368	3.92264	1.85407	5.99122	0.817628	-0.26472	1.89997
1.76667	3.27888	1.82359	4.73416	-0.39381	-0.56978	-0.21785	4.06532	2.02136	6.10928	0.915781	-0.17977	2.01133
1.8	3.43788	1.95246	4.9233	-0.38566	-0.52606	-0.24525	4.17147	2.1774	6.16553	1.02384	-0.08355	2.13123
1.83333	3.61788	2.02692	5.20885	-0.40319	-0.52553	-0.28084	4.1959	2.27294	6.11886	1.12291	-0.00482	2.25063
1.86667	3.94147	2.20421	5.67873	-0.43893	-0.57645	-0.30141	4.30147	2.43244	6.1705	1.27099	0.147697	2.39429
1.9	4.31249	2.40867	6.21631	-0.43367	-0.58576	-0.28158	4.33081	2.53384	6.12778	1.32104	0.249247	2.39284
1.93333	4.60454	2.55808	6.65099	-0.45823	-0.58978	-0.32667	4.28427	2.52215	6.04639	1.40037	0.346306	2.45443
1.96667	4.85102	2.6328	7.06923	-0.50835	-0.63771	-0.37898	4.21056	2.48941	5.93172	1.46433	0.416614	2.51205
2	5.10855	2.74422	7.47288	-0.52151	-0.64358	-0.39943	4.15726	2.49665	5.81788	1.55291	0.583074	2.52275
2.03333	5.33071	2.86617	7.79525	-0.50348	-0.61127	-0.39569	4.03981	2.40314	5.67649	1.61389	0.678841	2.54894
2.06667	5.52834	2.97859	8.0781	-0.56005	-0.63901	-0.48109	4.01449	2.39385	5.63513	1.76702	0.818793	2.71524
2.1	5.70953	3.12614	8.29291	-0.5301	-0.61103	-0.44917	3.98454	2.41536	5.55372	1.86523	0.933873	2.79659
2.13333	5.84477	3.30711	8.38242	-0.5136	-0.5959	-0.4313	3.95001	2.37843	5.52159	2.00404	1.08414	2.92393
2.16667	5.9505	3.53084	8.37016	-0.52713	-0.56917	-0.4851	3.9364	2.34385	5.52896	2.13968	1.20031	3.07906
2.2	6.09295	3.79302	8.39288	-0.51706	-0.56456	-0.46955	3.95998	2.35901	5.56094	2.25217	1.31515	3.1892
2.23333	6.21742	4.04211	8.39273	-0.49673	-0.57972	-0.41373	3.93809	2.32724	5.54894	2.34861	1.41815	3.27906
2.26667	6.3392	4.27723	8.40118	-0.49941	-0.62814	-0.37067	3.94417	2.3515	5.53683	2.49568	1.56777	3.42359
2.3	6.461	4.50001	8.42198	-0.46774	-0.62212	-0.31337	3.96131	2.36205	5.56056	2.59462	1.66992	3.51931
2.33333	6.60661	4.70077	8.51244	-0.3325	-0.53872	-0.12628	3.99503	2.33509	5.65496	2.6773	1.75666	3.59794
2.36667	6.71394	4.84484	8.58304	-0.22182	-0.51725	0.073603	4.00221	2.26992	5.73449	2.84628	1.89645	3.79611
2.4	6.78814	4.97763	8.59866	-0.09683	-0.44291	0.24925	4.04143	2.27264	5.81022	3.01171	2.00941	4.01402
2.43333	6.87564	5.16204	8.58925	0.070983	-0.31628	0.458246	4.10871	2.22885	5.98856	3.17777	2.11345	4.2421
2.46667	6.99224	5.32487	8.6596	0.290693	-0.09522	0.676604	4.18675	2.21459	6.15892	3.40913	2.24549	4.57277
2.5	7.15712	5.46448	8.84976	0.482147	0.088996	0.875297	4.30956	2.28417	6.33496	3.65665	2.40857	4.90472
2.53333	7.39889	5.70082	9.09696	0.684709	0.33641	1.03301	4.46049	2.34459	6.57638	3.77793	2.45811	5.09775
2.56667	7.70114	5.99084	9.41144	0.927422	0.545488	1.30936	4.52812	2.37489	6.68134	3.9092	2.56799	5.25041
2.6	7.9115	6.09903	9.72398	1.11189	0.689324	1.53446	4.54093	2.40644	6.67543	3.96994	2.59997	5.33991
2.63333	8.14277	6.24555	10.04	1.32419	0.920562	1.72782	4.52829	2.45664	6.59995	3.99724	2.64021	5.35426
2.66667	8.25178	6.33782	10.1657	1.57806	1.22548	1.93064	4.50014	2.55136	6.44891	3.97269	2.63121	5.31417
2.7	8.21053	6.26424	10.1568	1.83461	1.52938	2.13983	4.43696	2.67002	6.20389	4.03722	2.69895	5.37549
2.73333	8.11554	6.15759	10.0735	2.09704	1.88527	2.30881	4.43895	2.81094	6.06696	4.08736	2.709	5.46573
2.76667	8.04051	6.15229	9.92873	2.32473	2.176	2.47345	4.47863	2.9562	6.00106	4.18761	2.73858	5.63665
2.8	7.9417	6.02975	9.85365	2.40616	2.25052	2.5618	4.61522	3.17659	6.05386	4.30478	2.81773	5.79182
2.83333	7.91658	5.9621	9.87105	2.44905	2.28053	2.61756	4.74158	3.34984	6.13333	4.53711	3.00087	6.07335
2.86667	8.00314	6.02901	9.97728	2.41685	2.21929	2.6144	4.79488	3.53497	6.05479	4.83431	3.23394	6.43468
2.9	8.01122	5.97854	10.0439	2.40067	2.23117	2.57017	4.84936	3.7118	5.98692	5.11227	3.38468	6.83987
2.93333	8.06517	5.97081	10.1595	2.45168	2.28436	2.61901	4.95979	3.92742	5.99215	5.46533	3.66801	7.26265
2.96667	8.15391	6.06257	10.2453	2.54028	2.34917	2.7314	5.09734	4.18375	6.01092	5.83035	3.97813	7.68257
3	8.30249	6.23938	10.3656	2.61122	2.38461	2.83783	5.22632	4.41035	6.04229	6.13604	4.19509	8.07699
3.03333	8.36389	6.30856	10.4192	2.74592	2.48327	3.00858	5.42929	4.61717	6.2414	6.32454	4.30071	8.34838
3.06667	8.54648	6.50577	10.5872	2.84298	2.56579	3.12016	5.6287	4.84516	6.41224	6.48877	4.45159	8.52594
3.1	8.72155	6.65476	10.7883	2.86838	2.5613	3.17546	5.86722	5.12325	6.61119	6.5595	4.52003	8.59896
3.13333	8.92007	6.87858	10.9616	2.89624	2.55605	3.23642	5.98808	5.25232	6.72384	6.52987	4.49528	8.56447
3.16667	9.12306	7.07221	11.1739	2.88124	2.53739	3.2251	6.11257	5.40767	6.81747	6.52307	4.49307	8.55306
3.2	9.38955	7.30938	11.4697	2.85744	2.47486	3.24001	6.32544	5.64643	7.00445	6.50898	4.51269	8.50526
3.23333	9.55076	7.45282	11.6487	2.85567	2.43846	3.27288	6.6306	5.9443	7.31689	6.5062	4.56301	8.4494
3.26667	9.76319	7.71834	11.808	2.95476	2.60235	3.30717	6.85616	6.17276	7.53956	6.55593	4.71085	8.40101
3.3	9.95591	7.90048	12.0113	3.08158	2.80098	3.36218	7.09823	6.42734	7.76911	6.64654	4.82787	8.46521
3.33333	9.99237	7.93392	12.0508	3.18134	2.93413	3.42855	7.31655	6.6575	7.97559	6.7317	4.93435	8.52905
3.36667	9.97307	7.92506	12.0211	3.2343	3.03217	3.43643	7.51552	6.86698	8.16406	6.7691	5.01355	8.52465
3.4	10.0543	8.04411	12.0646	3.31681	3.12896	3.50465	7.58703	6.93212	8.24195	6.79609	5.08783	8.50436
3.43333	10.0435	8.04594	12.041	3.31323	3.08018	3.54628	7.62184	6.93518	8.3085	6.78549	5.09163	8.47936
3.46667	10.0061	8.07155	11.9406	3.24677	3.07266	3.42089	7.68394	6.94724	8.42065	6.76456	5.14826	8.38086
3.5	10.0415	8.16342	11.9196	3.22807	3.07584	3.3803	7.76616	6.98498	8.54734	6.67802	5.18549	8.17056
3.53333	10.0858	8.2674	11.9041	3.28079	3.11087	3.45071	7.76022	6.95911	8.56133	6.60373	5.19258	8.01488
3.56667	10.0831	8.26096	11.9052	3.28843	3.11774	3.45913	7.85355	6.98761	8.71949	6.48385	5.12258	7.84512
3.6	10.0951	8.24348	11.9467	3.31295	3.07777	3.54812	7.96031	7.05394	8.86668	6.43252	5.12032	7.74471
3.63333	10.1233	8.1854	12.0612	3.38729	3.05236	3.72222	8.00954	7.1348	8.88428	6.34848	5.04006	7.65689
3.66667	10.107	8.16699	12.0471	3.47719	3.08958	3.8648	8.08144	7.15463	9.00824	6.23593	4.9016	7.57025
3.7	10.0743	8.18723	11.9613	3.56311	3.1045	4.02173	8.23788	7.29242	9.18334	6.14552	4.77716	7.51387
3.73333	9.96469	8.10496	11.8244	3.6223	3.09289	4.15171	8.31684	7.38375	9.24993	6.12089	4.68907	7.5527
3.76667	9.87503	8.04652	11.7035	3.66685	3.11105	4.22265	8.36421	7.40695	9.32146	6.07287	4.56412	7.58162
3.8	9.77853	8.01782	11.5392	3.7285	3.16071	4.29629	8.49582	7.46073	9.53092	6.04355	4.47981	7.60729
3.83333	9.79236	8.0361	11.5486	3.70943	3.07809	4.34076	8.63398	7.60314	9.66483	6.09012	4.39406	7.78618
3.86667	9.80992	7.96072	11.6591	3.61443	2.9481	4.28076	8.76505	7.73405	9.79606	6.14017	4.30314	7.9772
3.9	9.84445	7.87843	11.8105	3.51254	2.84214	4.18294	8.82623	7.79286	9.85961	6.15016	4.21036	8.08996
3.93333	9.9739	7.88886	12.0589	3.41119	2.72056	4.10182	9.0656	8.09336	10.0378	6.13828	4.07312	8.20344
3.96667	10.1346	7.89919	12.3699	3.28523	2.58792	3.98254	9.28453	8.41154	10.1575	6.18672	3.98201	8.39143
4	10.2457	7.85166	12.6398	3.18559	2.48631	3.88487	9.47764	8.67012	10.2852	6.21554	3.94594	8.48515
4.03333	10.3313	7.8286	12.8341	3.12713	2.41038	3.84387	9.70008	8.96206	10.4381	6.21564	3.94865	8.48263
4.06667	10.4767	7.91523	13.0381	3.05041	2.31117	3.78964	9.91944	9.30114	10.5377	6.22217	3.95168	8.49267
4.1	10.5632	7.97652	13.15	2.97923	2.25346	3.705	10.0248	9.46947	10.5802	6.18172	3.93431	8.42913
4.13333	10.5388	7.90904	13.1685	2.96717	2.25975	3.67458	10.1163	9.59604	10.6365	6.09056	3.89874	8.28237
4.16667	10.4496	7.77181	13.1273	2.95127	2.23982	3.66273	10.1938	9.75475	10.6328	6.05319	3.92488	8.18151
4.2	10.4394	7.70905	13.1698	2.88019	2.1855	3.57488	10.2281	9.82532	10.6309	5.99009	3.90191	8.07826
4.23333	10.4345	7.65762	13.2113	2.88227	2.22203	3.54251	10.3549	9.95678	10.753	6.02143	3.94882	8.09403
4.26667	10.3867	7.53662	13.2368	2.88776	2.25915	3.51637	10.5138	10.1204	10.9071	6.03208	3.98194	8.08223
4.3	10.3528	7.45721	13.2484	2.78375	2.11828	3.44923	10.6601	10.3235	10.9967	6.05376	4.02863	8.0789
4.33333	10.4286	7.54566	13.3115	2.69304	2.05595	3.33013	10.8323	10.5474	11.1172	5.9741	3.98671	7.9615
4.36667	10.4853	7.62899	13.3415	2.66977	2.04793	3.29161	10.9374	10.6541	11.2206	5.97955	4.00276	7.95634
4.4	10.5019	7.68998	13.3138	2.60146	1.9746	3.22832	11.0031	10.6981	11.3082	5.954	3.9805	7.92749
4.43333	10.5871	7.79884	13.3753	2.48635	1.83061	3.14209	10.9819	10.6327	11.3311	5.96662	4.01128	7.92196
4.46667	10.7296	8.03891	13.4204	2.39903	1.75554	3.04252	10.9241	10.4747	11.3734	5.97992	4.02642	7.93343
4.5	10.8795	8.32068	13.4382	2.32903	1.67391	2.98414	10.8563	10.3034	11.4093	6.08006	4.06156	8.09855
4.53333	11.1317	8.68861	13.5747	2.23139	1.56022	2.90257	10.7298	10.1148	11.3448	6.18485	4.11855	8.25116
4.56667	11.3697	9.03582	13.7036	2.14471	1.47621	2.81321	10.6336	9.9526	11.3146	6.22041	4.12398	8.31683
4.6	11.5317	9.31574	13.7477	2.03402	1.39196	2.67608	10.5655	9.84609	11.285	6.2792	4.09907	8.45933
4.63333	11.701	9.55732	13.8447	1.94628	1.30864	2.58393	10.528	9.79558	11.2604	6.34336	4.12348	8.56324
4.66667	11.8404	9.77045	13.9104	1.87421	1.24476	2.50366	10.4394	9.65985	11.219	6.37329	4.1321	8.61447
4.7	11.7757	9.82814	13.7233	1.76466	1.18101	2.34831	10.4077	9.54913	11.2662	6.4016	4.14208	8.66113
4.73333	11.6934	9.892	13.4948	1.62784	1.05794	2.19774	10.3865	9.49718	11.2758	6.47583	4.181	8.77065
4.76667	11.6438	10.0084	13.2791	1.5396	0.965052	2.11415	10.3814	9.44562	11.3172	6.51658	4.22196	8.8112
4.8	11.5089	10.0721	12.9458	1.44446	0.912628	1.9763	10.3283	9.3022	11.3544	6.52167	4.20223	8.84111
4.83333	11.278	9.95761	12.5985	1.34736	0.826079	1.86863	10.2484	9.14721	11.3496	6.52309	4.19717	8.84901
4.86667	11.1247	9.86002	12.3893	1.29383	0.746576	1.84109	10.201	9.04801	11.3539	6.49943	4.12474	8.87412
4.9	11.0524	9.84454	12.2603	1.20937	0.685118	1.73363	10.0998	8.90226	11.2972	6.45592	4.0757	8.83615
4.93333	10.9776	9.74427	12.2109	1.14371	0.627793	1.65963	9.97276	8.75883	11.1867	6.37715	4.01459	8.73972
4.96667	10.9677	9.62709	12.3083	1.08838	0.561299	1.61546	9.86358	8.5936	11.1335	6.23316	3.91408	8.55223
5	10.9693	9.55023	12.3883	0.997266	0.467728	1.5268	9.73278	8.47469	10.9909	6.13218	3.81343	8.45094
5.03333	10.9317	9.4168	12.4466	0.893942	0.377959	1.40992	9.56535	8.3553	10.7754	5.98452	3.71102	8.25803
5.06667	10.8781	9.23537	12.5209	0.861245	0.334321	1.38817	9.42952	8.24229	10.6168	5.82233	3.5882	8.05647
5.1	10.7896	9.1133	12.4658	0.810438	0.286692	1.33418	9.24742	8.06295	10.4319	5.65805	3.48106	7.83503
5.13333	10.6419	8.95103	12.3327	0.740105	0.231537	1.24867	9.04988	7.9053	10.1945	5.6242	3.47743	7.77097
5.16667	10.5185	8.80901	12.2279	0.694873	0.230183	1.15956	8.94426	7.8238	10.0647	5.59465	3.48974	7.69955
5.2	10.4146	8.69451	12.1346	0.631606	0.192759	1.07045	8.84598	7.70638	9.98558	5.61019	3.52728	7.6931
5.23333	10.3011	8.54797	12.0543	0.51908	0.084156	0.954005	8.75501	7.54052	9.96951	5.61151	3.52898	7.69404
5.26667	10.2667	8.4444	12.089	0.436622	0.025464	0.84778	8.72754	7.44632	10.0088	5.65513	3.51211	7.79815
5.3	10.2096	8.3847	12.0346	0.382992	-0.03795	0.803933	8.7044	7.37739	10.0314	5.63935	3.46658	7.81212
5.33333	10.1006	8.26584	11.9353	0.324996	-0.1203	0.770291	8.69913	7.29779	10.1005	5.58102	3.38934	7.77271
5.36667	10.0242	8.22058	11.8279	0.283606	-0.17246	0.739668	8.66548	7.23426	10.0967	5.47612	3.25888	7.69337
5.4	9.9396	8.17848	11.7007	0.283247	-0.13611	0.702608	8.5391	7.13375	9.94444	5.38861	3.18398	7.59324
5.43333	9.7916	8.08755	11.4956	0.284199	-0.1228	0.691197	8.45131	7.13419	9.76843	5.29958	3.12049	7.47866
5.46667	9.77829	8.10354	11.453	0.271604	-0.11737	0.660578	8.41048	7.18486	9.6361	5.2298	3.0255	7.43411
5.5	9.81412	8.21612	11.4121	0.235152	-0.15146	0.621763	8.36004	7.21317	9.50691	5.13095	2.97293	7.28896
5.53333	9.86214	8.24846	11.4758	0.244313	-0.14403	0.632652	8.32318	7.19684	9.44951	5.05549	2.95198	7.159
5.56667	9.96262	8.2791	11.6462	0.261957	-0.15228	0.67619	8.35624	7.27074	9.44175	4.96822	2.86966	7.06677
5.6	10.0792	8.30915	11.8491	0.220195	-0.2024	0.642794	8.30641	7.24563	9.36719	4.85525	2.79517	6.91534
5.63333	10.1906	8.30677	12.0744	0.179487	-0.22543	0.584402	8.26343	7.16983	9.35703	4.74699	2.75166	6.74233
5.66667	10.3229	8.29536	12.3504	0.205067	-0.19639	0.606523	8.12915	6.99681	9.26149	4.66738	2.69674	6.63803
5.7	10.4155	8.31216	12.5189	0.214963	-0.17964	0.609561	8.06942	6.94187	9.19696	4.67818	2.7547	6.60166
5.73333	10.4468	8.33691	12.5566	0.200905	-0.17166	0.573471	8.05014	6.93238	9.16791	4.62955	2.77761	6.4815
5.76667	10.4391	8.28702	12.5911	0.216548	-0.16102	0.59412	7.96801	6.81223	9.12379	4.57819	2.74327	6.41312
5.8	10.4469	8.27769	12.616	0.242795	-0.17374	0.659328	7.91317	6.74588	9.08045	4.52692	2.75771	6.29614
5.83333	10.429	8.26568	12.5924	0.232924	-0.20676	0.672607	7.87538	6.73507	9.01568	4.48835	2.78713	6.18957
5.86667	10.462	8.29718	12.6268	0.25578	-0.16434	0.675902	7.73959	6.58725	8.89194	4.35452	2.69865	6.01039
5.9	10.4936	8.33195	12.6553	0.25008	-0.16122	0.661378	7.53431	6.35963	8.70899	4.29215	2.63502	5.94928
5.93333	10.5307	8.41848	12.6429	0.241419	-0.18644	0.669283	7.40926	6.23804	8.58048	4.2854	2.65412	5.91668
5.96667	10.5336	8.42757	12.6397	0.256233	-0.1572	0.669663	7.25652	6.08229	8.43074	4.24732	2.64803	5.84662
6	10.5492	8.42303	12.6754	0.307983	-0.04791	0.663872	7.20705	5.99593	8.41818	4.15286	2.61134	5.69438
6.03333	10.4539	8.34173	12.5661	0.26966	-0.0782	0.617515	7.1808	5.887	8.4746	4.10986	2.59203	5.62769
6.06667	10.4084	8.29943	12.5174	0.284709	-0.07228	0.641694	7.14478	5.7683	8.52127	4.0928	2.60887	5.57673
6.1	10.4096	8.28958	12.5297	0.301832	-0.02788	0.631545	7.20861	5.77262	8.64461	4.07156	2.66488	5.47824
6.13333	10.3408	8.22464	12.457	0.320854	-0.0053	0.647006	7.212	5.72643	8.69757	4.03423	2.65221	5.41625
6.16667	10.2926	8.16815	12.417	0.302676	-0.04486	0.650215	7.12932	5.62788	8.63075	4.01797	2.62558	5.41037
6.2	10.4053	8.27829	12.5323	0.327502	-0.04496	0.699967	7.10505	5.60306	8.60704	4.02252	2.65787	5.38718
6.23333	10.465	8.3665	12.5636	0.328952	-0.05443	0.712337	7.07682	5.57572	8.57792	3.9693	2.66311	5.27549
6.26667	10.5467	8.43432	12.6591	0.37942	-0.00843	0.767269	7.04514	5.52465	8.56564	3.84204	2.57967	5.10441
6.3	10.6352	8.53897	12.7314	0.372521	0.004776	0.740265	7.06904	5.52574	8.61235	3.76307	2.54225	4.98389
6.33333	10.7377	8.67665	12.7987	0.359598	-0.03053	0.749731	7.08447	5.47239	8.69655	3.72057	2.49294	4.94819
6.36667	10.774	8.74134	12.8067	0.344754	-0.03798	0.72749	7.0891	5.44762	8.73057	3.61288	2.41359	4.81217
6.4	10.8487	8.82428	12.8732	0.335406	-0.00787	0.678685	7.16573	5.48656	8.84489	3.53722	2.37661	4.69784
6.43333	10.8618	8.86973	12.8538	0.327293	-0.00076	0.655341	7.13537	5.39368	8.87707	3.5443	2.36965	4.71895
6.46667	10.9578	8.94684	12.9687	0.351195	-0.00448	0.706867	7.15058	5.39233	8.90884	3.52796	2.31625	4.73966
6.5	11.0866	9.05333	13.1198	0.371683	0.046614	0.696752	7.21302	5.41685	9.00918	3.51829	2.2996	4.73698
6.53333	11.1882	9.08172	13.2946	0.396159	0.119675	0.672643	7.28075	5.46459	9.09691	3.46913	2.23486	4.70341
6.56667	11.2671	9.04894	13.4852	0.370068	0.071288	0.668848	7.33911	5.50097	9.17726	3.48292	2.18313	4.78272
6.6	11.297	8.97013	13.6238	0.351894	0.03887	0.664918	7.38507	5.57135	9.19879	3.42534	2.1176	4.73308
6.63333	11.2753	8.85864	13.692	0.342739	0.040763	0.644716	7.35976	5.57137	9.14815	3.37685	2.10439	4.64931
6.66667	11.1947	8.72146	13.668	0.289381	-0.0326	0.611368	7.34682	5.56432	9.12931	3.33433	2.08226	4.58641
6.7	11.1647	8.68952	13.6399	0.250827	-0.1029	0.604555	7.31699	5.53013	9.10384	3.33499	2.02691	4.64307
6.73333	11.1124	8.67702	13.5477	0.306158	-0.02846	0.640775	7.26536	5.46681	9.06391	3.27427	1.91432	4.63421
6.76667	11.1014	8.66624	13.5366	0.309512	-0.00703	0.626049	7.25859	5.4374	9.07978	3.22019	1.75375	4.68662
6.8	11.0919	8.6749	13.5088	0.285347	-0.05136	0.622058	7.289	5.39939	9.1786	3.19931	1.63849	4.76013
6.83333	11.1123	8.65503	13.5697	0.329749	0.000576	0.658923	7.35979	5.46005	9.25953	3.10969	1.47362	4.74576
6.86667	11.0475	8.4766	13.6185	0.32089	0.016197	0.625583	7.38392	5.46954	9.29829	3.02671	1.40577	4.64765
6.9	10.931	8.28732	13.5747	0.255879	-0.03391	0.545673	7.4137	5.50497	9.32243	2.98038	1.40898	4.55178
6.93333	10.8	8.16124	13.4387	0.231046	-0.03762	0.499714	7.4862	5.56686	9.40554	2.92596	1.43119	4.42072
6.96667	10.7114	8.05424	13.3687	0.251089	0.004102	0.498076	7.52862	5.63067	9.42657	2.84929	1.4442	4.25438
7	10.6272	7.96959	13.2848	0.251991	0.037913	0.466069	7.40368	5.52667	9.28068	2.83901	1.49167	4.18636
7.03333	10.5751	7.95389	13.1963	0.287796	0.057104	0.518487	7.32993	5.454	9.20586	2.80006	1.48416	4.11597
7.06667	10.5997	8.00564	13.1938	0.313032	0.107741	0.518323	7.28399	5.37124	9.19674	2.66216	1.35077	3.97356
7.1	10.6442	8.0957	13.1927	0.295041	0.047208	0.542874	7.20907	5.23609	9.18205	2.55874	1.29856	3.81892
7.13333	10.6032	8.1013	13.1051	0.283195	-0.00822	0.574606	7.16627	5.13699	9.19555	2.47941	1.23929	3.71953
7.16667	10.5652	8.11683	13.0136	0.242753	-0.04382	0.529328	7.16757	5.07934	9.25579	2.31158	1.15516	3.46799
7.2	10.5519	8.18891	12.9149	0.210112	-0.04314	0.463366	7.15012	5.03401	9.26623	2.20069	1.11451	3.28687
7.23333	10.6038	8.32067	12.8869	0.232961	-0.03705	0.502969	7.06872	4.91388	9.22356	2.15793	1.12061	3.19525
7.26667	10.6987	8.41995	12.9773	0.26924	0.007991	0.530489	6.92849	4.79823	9.05876	2.11429	1.11255	3.11602
7.3	10.8681	8.62952	13.1066	0.278411	0.036943	0.519879	6.7545	4.64915	8.85985	2.0501	1.1012	2.999
7.33333	10.9364	8.79891	13.0739	0.382185	0.108272	0.656098	6.66604	4.63201	8.70007	2.07208	1.10473	3.03944
7.36667	11.0022	8.92923	13.0752	0.4634	0.123615	0.803185	6.57304	4.60688	8.53919	2.02733	1.07862	2.97603
7.4	11.012	9.03744	12.9866	0.501804	0.113302	0.890307	6.46094	4.60306	8.31883	1.97209	1.03279	2.91139
7.43333	10.9995	9.14032	12.8587	0.543267	0.135654	0.950881	6.32946	4.56234	8.09659	2.02181	1.05113	2.99249
7.46667	10.8846	9.13938	12.6298	0.572123	0.113693	1.03055	6.21258	4.54127	7.88389	2.06286	1.03069	3.09503
7.5	10.8331	9.17503	12.4913	0.500889	0.008142	0.993635	6.0376	4.39823	7.67696	2.07209	1.05762	3.08657
7.53333	10.7629	9.18341	12.3423	0.464792	-0.02436	0.953945	5.85547	4.28352	7.42742	2.12453	1.07165	3.17741
7.56667	10.6922	9.08803	12.2964	0.499728	0.03379	0.965666	5.71041	4.19592	7.2249	2.16016	1.09787	3.22245
7.6	10.6315	9.012	12.251	0.540929	0.077106	1.00475	5.60028	4.10472	7.09584	2.07096	0.98868	3.15323
7.63333	10.6321	8.9853	12.2788	0.519949	0.093073	0.946826	5.45317	3.99387	6.91248	2.05556	0.958212	3.15291
[truncated: 120,835 more rows]
[truncated: 5 more columns]

## Sheet: Extended Data Fig. 1
Extended Data Fig. 1d									Extended Data Fig. 1g					Extended Data Fig. 1k		Extended Data Fig. 1l
[truncated: 8 more rows]

[truncated: 9 more sheets: Extended Data Fig. 3, Extended Data Fig. 4, Extended Data Fig. 5, Extended Data Fig. 6, Extended Data Fig. 7, Extended Data Fig. 8, Extended Data Fig. 9, Extended Data Fig. 10, Extended Data Fig. 11]
