# Supplementary material for: Astrocytic glycogen aggregates induce ATAD3A oligomerization mediated mitochondrial fragmentation and impede stroke recovery
Source: Research Square preprint supplement (doi:10.21203/rs.3.rs-6650856/v1), 2026-02-03
Supplement: Supplementary file 2 [file Supplementary table1.xlsx]

## Sheet: glycogen enriched proteins01
Glycogen enriched proteins
Gene name
Nova2
Slc9a6
Cul4b
Arfgef2
Chd5
Ptprf
Ckap5
Rap1gap
Shroom2
Plch2
Scn1a
Skt
Agrn
Slc25a25
Arid1a
Mtr
Armt1
Itih4
Nlgn4l
Ptprs
Grik3
Scn2a
Nfx1
Dlgap4
Gnai1
Apba1
Plxnb2
Ildr2
Clip3
Cttnbp2
Ptprz1
H2ac4
Akap5
Safb
Shank1
Rbm24
Gls
Prrt2
Fga
Pi4ka
Ryr2
Arid1b
Dsp
Nolc1
Numa1
Heg1
Nrxn2
Dnah1
Rap1gds1
Dlg5
Syngap1
Tpr
Farp1
Atp2b1
Ank3
Hk2
Capn2
S1pr1
Cacna2d1
Bin1
Sec22b
Dpysl2
Emd
Alyref
Clta
Pten
Stxbp1
Endog
Mttp
Myh11
Sema3a
HDAC3
Kng1
Ngp
Prdx6
Casp6
Ampd3
Unc5c
Dld
Hsd17b10
Ube3a
Tcof1
Dctn1
Prkcsh
Prdx4
Diaph1
Eftud2
Gfra2
RO60
Pik3r2
Faah
Aip
Flot1
Numbl
Cyth3
Sdcbp
Pex5
Psmb1
Ptgds
Ntn1
Sema4d
Gsto1
Man2b1
Sod3
Gclm
Amacr
Agpat1
Scarb2
Phb2
Ncam2
Atp5if1
Terf2
Col15a1
Cenpa
Psmd4
Exoc7
Dhx15
Purb
Srsf5
Kpna4
Capn1
Nrp2
Anp32a
Exoc4
Efnb3
Pld3
Folh1
Dhodh
Prrt1
Fkbp8
Slc27a2
Cdk14
Stx1a
Rabep1
Psmd14
Adam10
Npc1
Bmpr2
Scamp3
Pmm1
Slc32a1
Anxa3
Ap1b1
C1qbp
Hap1
Mgll
Syt3
Nudc
Bcat2
Cops5
Slc1a4
Cdk5r2
Ctnnd2
Fxn
Aldh1a7
Pitpnm1
Psmb10
Sdc4
Cavin1
Aox1
Ap3d1
Srpk2
Rgs7
Csnk2a2
Hmgb3
Itgb3
Cd200
Reps1
Pakap
Smarce1
Dnajb6
Sema6b
Crym
Slk
Prom1
Cntnap1
Bnip3
Trappc3
Cacna1b
Pgrmc1
Impa1
Entpd2
Copb2
Nck2
Snca
Tpmt
Impact
Syngr1
Bloc1s1
Strn
Septin7
Eif6
Acot1
Rpl35a
Atp2a2
Pja1
Cd59a
Supt5h
Psmb5
Dhx9
Pip5k1c
Fcn1
Stmn3
Pip4k2a
Eif3d
Aif1
Atp9a
Pgam2
Hmox2
Sgce
Ptp4a2
Grk6
Itgb5
Nmt1
Epb41l2
Gpx4
Per3
Gpld1
Pdlim1
Fzd1
Fhl2
Psma3
Stx7
Gnaz
Slc16a7
Sfn
Vamp4
Snx3
Hsd17b12
Srpk1
Dtnb
Cask
Cfdp1
Sorl1
Nid2
Wdr1
Slc4a4
Vti1b
Adcy1
Klc1
Klc2
Capns1
Dync1i1
Dync1i2
Pde8a
Cntfr
Ppt1
Ddc
Cops3
Hnrnpa2b1
Lrp6
Slc6a20b
Comt
Becn1
Cacng2
Gosr1
Pak1
Emp2
Clpp
Hcn2
Ctbp1
Map7
Bsn
Gdap1
Tom1
F11r
Dcx
Stam2
Adam15
Idh1
Mpp3
Syn1
Lin7c
Gnpda1
Stx8
Olfm1
Cpd
Afm
Robo1
Mkln1
Itm2b
Coro1a
Pde4a
Rbm3
Fhit
Lancl1
Vti1a
Mt-Cyb
Mtco1
Hprt1
Ca2
C3
C4b
Jchain
Thy1
Ighg2b
Ighg1
Ighm
B2m
H2-L
H2-Q10
H2-K1
Hba
Hbb-b1
Hbb-b2
Hbb-y
H3-5
Lamc1
Lamb1
Krt10
Mt2
Gfap
Krt1
Cfb
Mb
Mbp
Araf
Slc4a1
Prnp
Aldoc
Aldoa
Got1
Got2
Tuba1b
Src
Itgam
Ldha
C5
Apoa4
Gpi
Ctsl
Ptprc
Me1
Enpp1
Gap43
Cfh
Anxa2
Klk1b8
Alb
Serpina1a
Serpina3k
Hsp90aa1
Pdia4
Aprt
Spta1
Ltf
Cbr2
Hsp90b1
Col4a2
Apoe
Sod1
Mdh2
Camk4
Fcgr3
Nefl
Nefm
Nras
Gnai2
Polr2a
Itgb1
P4hb
Alpl
Ncl
Pgk1
Ace
Fth1
Hmgn2
Sod2
Apoa2
Nudt10
Chmp6
H2az1
Lrrc4b
Nrxn1
Calm1
Lynx1
Anxa1
Eef1a1
Nid1
Alad
Ctsb
Mapt
Txn
Gstm1
Tcea1
Rras
Slc3a2
H2bc7
H1-0
Sub1
Mpo
Fn1
Gpx1
Fabp3
Lamp1
Hsp90ab1
Dmd
L1cam
Itga5
Camk2a
Itgb2
Agt
Itpr1
Tcp1
App
Mdk
Gusb
Prkar2a
Pfkl
Chrm1
Calb1
Pdcd6
Prkar1b
Cntn1
Rpl7a
Gsn
Ncam1
Gpd1
Dnmt1
Atp1b1
C1qb
Rpl27a
Rps16
Rpl7
Mdh1
Rpsa
Calr
Atp1b2
Srp54
Hspb1
Lmnb1
Anxa6
Crp
Rplp0
Map1b
Glul
Cdh2
Insr
Ntrk2
Bpgm
Cd44
Kcnc1
Sptb
Nme1
H1-2
Klk1b9
Lgals1
Prkce
Ldhb
Lcat
Cnp
Mmut
D1Pas1
Kcna1
Kcna3
Enpep
Ass1
Sptan1
Gapdh
Lamp2
Hmga1
Hspa2
Eno1
Eno2
Ptbp1
Ap2a1
Ap2a2
Gba1
Selenbp1
Hk1
Ppia
Tpi1
Slc2a1
Hspa1b
Ptpra
Ctsd
Bsg
Slc7a2
Cfl1
Phka1
Gnao1
Fasn
Lama1
Gstp1
F2
Nefh
Rpl13a
Hspa5
Hexb
Prdx3
Vim
F3
Map2
Prkca
Fcer1g
Mag
Plg
Tpm3
Gna11
Gnaq
Akr1b7
Abcb1a
Cst3
Eno3
Gc
Lmnb2
Pcsk2
Ache
Mfge8
Tgm2
Emb
Penk
Fech
Ptgs1
Serpina1b
Cbl
Gabrg2
Ap1g1
Gabrd
Eif3a
Cbx3
Gja1
Xrcc6
Pnp
Pcmt1
Gfus
Glb1
Gria1
Gria2
Cryab
Ces1c
Cat
Bcat1
Ppib
Capg
Gsta4
Lta4h
Th
Impdh2
Aldh1a1
M6pr
Ndn
Rps2
Timp2
Lyn
Ubtf
Tln1
Ezr
Msn
Rdx
Gabra3
Fcgr1
Ctnna1
Klkb1
Chga
Ptma
U2af2
Glud1
Pik3r1
Sars1
Marcks
Fkbp1a
Snrpb
Map4
Gna13
Plaa
Xrcc5
Rpl3
H2ax
Pdia3
Psmb8
Aco1
Apex1
Adh5
Dusp1
Slc6a9
Max
Adss1
Camk2b
Nap1l1
Nckap1
Septin4
Napb
Mug1
Marcksl1
Kif5c
Kif2a
Grn
Ptprm
Dpp4
Prkcd
Pabpc1
Nos2
Vcam1
Nedd8
Ahsg
Vtn
Ckmt1
Fkbp4
Hmgb2
Sstr2
C5ar1
Ctnnd1
Aimp1
Prkar2b
Slc6a1
Slc6a13
Slc6a11
S100a9
Dbi
Map2k1
Scp2
Slc2a3
Ssb
Serpinc1
Nectin2
Wars1
Kif1a
Apoc3
Ranbp1
Ptk2
Ephx2
Apoc1
Ptpn11
Rab3d
Rab5c
Rab6a
Rab21
Rab12
Rab23
Rab24
Rab18
Grin2a
Grin1
Pdha1
Fah
Fbl
Canx
Ap1m1
Prdx1
Cd81
Gpm6a
Gpm6b
Rpl12
Rpl18
Cpox
Ppm1b
Por
Hmgcl
Hspa9
Mbl1
Dnm1
Grik2
Man1a2
Tjp1
Fyn
Cap1
Tkt
Vps26a
Vhl
Tfam
Rpl28
Ltb
Cetn1
Acsl1
Eci1
Septin2
Eps15
Pura
Htt
Cct8
Slc1a2
H1-4
H1-1
H1-5
Itgav
Sdc2
Akr1b1
Cfl2
Man1a1
Acadm
Rangap1
Syt1
Syt2
Gpx3
Cdkn1b
Nsf
Vps4b
Psmc2
Rab11b
Ina
Nf2
Adss2
Brcc3
Nedd4
Yap1
Stt3a
Rph3a
Aldh2
Aldh3a1
Aldh3a2
Cnr1
Capza2
Capzb
Nsg2
Gsr
Map2k4
Pfkm
Igfbp4
Rpl6
Rpl29
Crat
Crkl
Rpl5
Rpl13
Rpl36
Anxa5
Epb41
Gad1
Gad2
Ppp3cb
Ppp3cc
Lmna
Cbr1
Gstm5
Slc25a4
Cit
Camlg
Hnrnpa1
Ppm1a
Ptpre
Pcyt1a
Cdk5
Psma2
Psen1
Tmod1
Cav1
Impdh1
S100b
Hsd17b8
Hsd11b1
Ahcy
Fmo1
Gdi1
Sts
Arsa
Arsb
Shmt1
Krt6a
Atp6v1a
Atp6v1e1
Acadvl
Gabrb1
Pa2g4
Tub
Rab7a
Acadl
Rpl9
Plcb3
Camp
Gla
Gpc4
Hsd17b4
Clcn3
Adcy9
Gss
Hdgf
Atp6v0d1
Fabp7
Slc25a5
Apod
Clgn
Tst
Pkm
Ube2e1
Ndufs6
Upp1
Rida
Efnb2
Cpt2
Tia1
Hmga2
Rpl10a
Dbt
Rabggtb
Pitpna
Pitpnb
Slc16a1
Rab2a
Cnbp
Idh2
Dnajc2
Stom
Stmn1
Cacnb3
Rad23b
Ephb3
Ephb2
Psmc4
Galc
Adsl
Ddx6
Slc12a2
Ncan
Aqp4
Tyro3
Rab8a
Cdh11
Lrpap1
Entpd1
Stmn2
Gfer
Rab4a
Cda
Cyb5a
Usp5
Atp5f1b
Cckbr
Cd38
Slc1a3
Wfs1
Bace1
Fus
Ncstn
Eef1d
Actn4
B3gat3
Smpdl3b
Eef2
Opa1
Ptpa
Strn4
Hrh3
Tpm1
Tpm2
Mrtfb
Dock4
Il1rapl1
Sst
Ruvbl1
Plp1
Eif3e
Pcbp1
Ppfia3
Pdxp
Gabarapl2
Nploc4
Actb
Mdga2
Nrgn
Morf4l1
Rac3
Cdc42
Cirbp
Lzts1
Rps20
Snap25
Dnajc5
Rab5b
Chp1
Rab10
Rab8b
Ube2d3
Ube2d1
Ube2k
Ube2n
Fgf1
Actr2
Cops2
Abce1
Rap2b
Rpl26
Stx1b
Psme3
Rab6b
Fgf12
Rpl27
Pcbd1
Rpl37a
Sec61a1
Arf4
Lpar1
Abat
Sumo2
Wdr5
Hnrnpk
Ywhag
Usp46
Rras2
Ppp1ca
Ppp1cb
Psmc1
Psmc5
Rps8
Rps15a
Ube2h
Ywhae
Rps18
Rps13
Snrpd1
Snrpd2
Snrpd3
Arf6
Selenot
Kcnab2
Abi2
Rab11a
Tsc22d1
Eef1a2
Ppp2cb
Rpl18a
Acta2
Ap2s1
Rhob
Rpl23a
Rps6
H4c1
Gabra1
Atp6v1b2
Rab1A
Rab3c
Ran
Rap1a
Rps15
Rps25
Rps28
Fau
Elob
Gnb1
Rbx1
Gnb2
Gnb5
Rpl30
Cycs
Rpl31
Rps3
Gtf2b
Rpl8
Ybx1
Pfn1
Rps27a
Tra2b
Tle5
Pafah1b1
Rab3a
Hspa8
Vamp3
Tpt1
Cyth2
Dnaja1
Hspd1
Cplx1
Vamp2
Eif4e
Gabrb3
Mapk1
Ppp1cc
Ptn
Gnas
Ywhaz
Gabrb2
Kcna2
Kcnab1
Hmgb1
Snrpn
Dynll1
Pcsk1
Kcnj3
Rps17
Ube2i
Selenow
Prkcg
Rala
Rps12
Rps10
Ppp3ca
Ppp2ca
Phb1
Csnk2b
Rpl22
Ube2l3
Rack1
Prkacb
Ywhaq
Tuba4a
Tubb4b
Prkcb
Cntn5
Ywhah
Ranbp9
Sbds
Kpnb1
Dlg3
Pip5k1a
Psmb7
Adcyap1r1
Plxna1
Plxna2
Dcc
Chl1
Ebp
Nfic
Pfkfb2
Selenop
Surf6
Vamp7
Hdac2
Mpp1
Pebp1
Stim1
Rock1
Rock2
Bcl2l2
Hint1
Ufd1
Elavl1
Usp9x
Tp53bp1
Cux1
Cdh10
Slc8a1
Slc7a3
Evl
Nherf1
Stx4
Ldb1
Sparcl1
Naca
Casp3
Urod
Gaa
Atp8a1
Uty
Cct7
Cct2
Cct4
Cct5
Cct6a
Cct3
Ptprn2
Nucb2
Atf1
Renbp
Tnik
Wnk1
Rpl36a
Eloc
Hpca
Arf5
Cplx2
Ap2m1
Rhog
Rpl19
Srsf3
Adcy5
Rpl10l
Serping1
Serpinf1
Nptn
Cdh6
Nrp1
Nxn
Rps3a
S100a13
Sptlc2
Atp1b3
Anxa11
Crmp1
Slc30a3
Cacna1a
Fhl1
Anpep
Rps5
Pam
Ppp4c
Coq7
Rgs14
Gclc
Wbp2
Grm1
Gfra1
Cxadr
Sirpa
Neo1
Fh
Anp32e
Lypla1
G3bp1
Casp7
Lama4
Scn1b
C1qa
Vldlr
Atp8a2
Tubb5
Psmb4
Prdx5
Stx2
Cpe
Xdh
Il6st
G6pdx
Apoa1
Itga4
Serpina1d
Serpina1e
Yy1
Rbp1
Pde1b
Grin2b
Egfr
Adra2a
Apoh
Sec23a
Nme2
Vcp
Aqp1
Uba1
C1qc
Ctnnb1
Jup
Ank1
Nucb1
Chat
Epha4
Aplp1
Enah
Atp5f1a
Scg2
Ckb
Smpd1
Nf1
Yes1
Top1
Sox8
Apoc2
Mark2
Hspg2
Fabp5
Pc
Eml1
Larp7
Eif5b
Aplp2
Clu
Anxa7
Igfbp5
Igf2r
Ambp
Tle3
Lyar
Kcnma1
Pecam1
Eps8
Padi2
Cd36
Fbln1
Ssrp1
Slc7a1
B4galnt1
Ubxn2b
Trio
Itgb8
Vgf
Npepps
Grm2
Phactr1
Psd3
Pi4k2a
Lrfn1
Slc39a7
Osbp
Emc10
Cul4a
Abraxas2
Plbd2
Rogdi
Stt3b
Hp1bp3
Lpcat1
Myl12b
Gtf2f1
Gmps
Mat2a
Ric8a
Pde12
Zc3h15
Smarca4
Tmem38a
Map9
Krt2
Ccdc136
Pbxip1
Pip4p1
Cnnm2
Srsf6
Slc17a7
Smyd5
Slc25a33
Esyt2
Ogfod1
Trappc9
Khsrp
Pag1
Ddb1
Tmem231
Rnf149
Rnf40
Lmf1
Cmpk2
Esyt1
Lbr
Ube2z
Nt5c3b
Nat8l
Dip2b
Wnk2
Plxnd1
Adgrb1
Snx27
Agap2
Aak1
Slc2a13
Tenm4
Mettl14
Rmdn3
Tax1bp1
Gpd1l
Parp3
Mcu
Hdgfl2
Eml4
Lclat1
Gprin1
Sec31a
Slmap
Ccdc51
Peg3
Plcl1
Sorbs2
Tbc1d24
Them4
Pgap1
Ermp1
Vps51
Slc30a10
Grm5
Macrod2
Elapor2
Tmem237
Endou
Nt5c2
Mthfd1l
Itga1
Carmil2
Shank3
Abl2
Oxr1
Unc13a
Ece1
Sez6l2
Tapt1
Maea
Ddx17
Phactr4
Srrm1
Thrap3
Scn2b
Spag9
Stxbp5l
Mypn
Slc4a10
Psd
Lrrc8b
Ermn
Taok1
Slc39a12
Cemip2
Xkr4
Taf3
Slc30a9
Dph1
Crppa
Brsk1
Islr2
Cyfip2
Fbxw11
Abr
Arhgap44
Psme4
Specc1
Myo1d
Lmtk3
Arcn1
Sema5b
Kif1b
Ogdh
Cttn
Kcnh1
Myl6
Adora1
Adora2a
Icam5
Epha5
Grb2
Flot2
Clpb
Hnrnpd
Ptprn
Lama2
Ppp5c
Psmb6
Samhd1
Slc27a1
Csnk2a1
Slc30a1
Bag1
Khdrbs1
Igf1r
Gcdh
Irgm1
Stxbp3
Cldn11
Gas7
Traf3
Ppp1r1b
Col12a1
Stip1
Caprin1
Reep5
Arhgef2
Eps15l1
Ggt1
Vdac2
Vdac3
Vdac1
Coq8a
Kpna1
Pla2g7
Rbbp4
Xiap
Cyp7b1
Ppp2r5c
Gng7
Asns
Tmpo
Pak3
Usf1
Ppm1g
Cdc37
Fzd7
Ksr1
Abcb7
Cfi
Prpf4b
Astn1
Cp
Ctcf
Slc9a1
Mapre1
Prdx2
Tsg101
Hcfc1
Pafah1b3
Psap
Dyrk1a
Lcp1
Fnta
Igbp1
Soat1
Acan
Cacna1e
Lamb2
Ctnna2
Slc6a3
Cntn2
Bcap31
Bad
Bcan
Cox7a2l
Mme
Hras
Hadh
Znf638
Smarcd1
Msi1
Pde1a
Alcam
Nt5e
Erbb4
Glg1
Ewsr1
Snap91
Fscn1
Igfbp7
Ktn1
Gdi2
Grid1
Pacsin1
Hp
Ddx5
Cbx5
Atrx
Hsph1
Elavl4
Il1rap
Cd47
Itga7
Itga6
Phgdh
Kif5b
Kif3b
Epha7
Pdcd4
Mrc1
Pzp
Myh10
Mog
Npm1
Pcbp2
Pdpn
Pea15
Vcan
Plcg1
Pick1
Nsg1
Srsf2
Dlg4
Ptprr
Dag1
Sema4a
Sema4b
Sema3c
Dpysl3
Rpa2
Sema5a
Sptbn1
Syp
Taf6
Tgoln1
Trim28
Tsn
Tfrc
Snrnp70
Supt6h
Zpr1
Tpd52
Epha6
Sorbs1
Dbnl
Sh3gl1
Sh3gl2
Sh3gl3
Ndrg1
Vamp1
Eif4g2
Itga3
Zyx
Ppp3r1
Mapk3
Nup62
Omg
Cavin2
Mef2d
Kcnc3
Crk
Raly
Gdpd5
Spr
Maoa
Sf1
Ccn3
Cd34
Myo6
Syn2
Tbr1
Sqstm1
Isg15
Bcl2l1
Atp4a
Sord
Ca4
Ptprj
Gapdhs
Ptprd
Tpp2
Gk
Sdc3
Guk1
Gpd2
H2ac20
H2bc21
Stx3
Zrsr1
Vcl
Cr1l
Gart
Ptpmt1
Slc13a5
Grm7
Grm4
Cltc
Atg9a
Git1
Pkp4
Ahcyl2
Cntn4
Brsk2
Gba2
Prex1
Nlgn2
Myof
Pnkd
Myorg
Sv2c
Kazn
Thsd7a
Ehbp1
Swap70
Atrnl1
Cep170
Cdc5l
Rftn1
Usp7
Arhgap21
Nop58
Atp11b
Megf10
Smarca2
Scaf8
Lemd2
Slc25a23
A2m
Ralgapa1
Gpsm1
Cltb
Retreg2
Cpsf6
Dpp10
Asic1
Sec23ip
Eif4g1
Hdac4
Sri
Sez6l
Ppp4r3a
Nudt16
Snrnp200
Uggt1
Dgkq
Sepsecs
Pnlip
Snx6
Ano6
Nrxn3
Fkbp15
Oxsr1
Atl2
Bcr
Prmt8
Ptpn23
Lrpprc
Galnt2
Ttbk1
Mff
Rgma
Ppp2r5a
Smarcc2
Srsf1
Mylk
Rnf220
Ado
Abhd10
Rrm2b
Mapre3
Pik3c3
Nup98
Tra2a
Washc2
Dclk2
Erc2
Rab35
Cacna2d2
Sort1
Camk2d
Atp1a3
Atp1a2
Rhbdf1
Atp2b4
Ppp1r9b
Vkorc1l1
Myh14
Sdk2
Ranbp10
Wdfy3
Ntrk3
Dagla
Slc44a1
Tacc1
Sbf1
Ube2o
Pitpnm2
Zc3h4
Cnot1
Larp1
Acap2
Rps9
Ppp2r2b
Syne1
Rps27
Rpl35
Eif2s1
Akap9
Cmya5
Tm7sf2
Cspg5
Kyat3
Ppp2r1a
Slc39a4
Msrb2
Fbxo22
Eci3
Snd1
Dnajc15
Brd2
Picalm
Rtn4rl2
Opalin
Cyfip1
Plppr4
Syncrip
Tubb2a
Abcg2
Huwe1
Cpeb3
Luc7l2
Inpp5a
Igsf21
Dek
Robo2
Actn1
C2cd5
Mybbp1a
Lnpk
Igsf1
Tppp
Amph
Otub1
Map6
Sez6
Ube2q1
Pgm2
Galnt17
Elp1
Rragd
Ahcyl1
Mib1
Gabbr2
Lrfn2
Gramd1b
Cadps
Ppm1e
Zdhhc17
Cyld
Adgrl1
Adgrl3
Clasp1
Fnbp1
Dnajc6
Pja2
Madd
Rimbp2
Usp8
Plxna4
Septin9
Rab3gap1
Sass6
Naa15
Dgkz
Slc20a2
Pgrmc2
Fbxo2
Kcmf1
Bpnt2
Tdrkh
Epn1
Aldh3b1
Ppp1r10
Wipi2
Zmpste24
Ntaq1
Lrrc8a
Mtdh
Hapln4
Jph4
Ubap2l
Tmem106b
C2cd2l
Flnb
Lrrtm4
Eif4g3
Pip4k2b
Nucks1
Lrfn4
Llgl1
Ddhd2
Ddhd1
Cnksr2
F12
Tnc
Astn2
Negr1
Shank2
Adgrb3
Lrsam1
Ankfy1
Slitrk5
Slitrk1
Nfasc
Nrcam
Dlg1
Arhgap32
Pcyt1b
Pdk1
Wdr82
Pcid2
Entpd3
Pef1
Psmd11
Sv2b
Cpt1c
Reep1
Enpp6
Vipas39
Aars1
Ostm1
Flrt3
Ccny
Mief1
Slc5a7
Pck2
Mfsd8
C8b
Wasf2
ARK2N
Wdr48
Slc25a12
Gopc
F13a1
Atl1
Napepld
Echs1
Dtd2
Nrdc
Ppm1l
Ganab
Armcx3
Mia3
Cd99l2
Dock9
Chtf18
Anks1b
Dlgap2
Nup93
Chmp2b
Slc6a17
Sun2
Sgta
Tspan9
Eif2a
Csnk1a1
Rcc2
Ipo5
Ift74
Ptk7
Baiap2
Slc25a29
Unk
Ablim2
Eea1
Srsf7
Slc17a6
Nceh1
Cadm2
Slc9a7
Tars3
Olfm2
Cdadc1
Slc25a24
Cbln4
Dlat
Gga3
Lars1
Ckap4
Qars1
Acbd3
Hadha
Coq3
Ncs1
Acp6
Metap1
Rpl24
Daam1
Dmxl2
Lypd6
Sgsm1
Rgs7bp
Bicd1
Kirrel3
Tmtc3
Man2a2
Clasp2
Slc18a2
Pbrm1
Ppfia2
Cnot4
Ndrg4
Enpp4
Flna
Exosc6
Kyat1
Slc4a7
Iars1
Hook3
Slc24a2
Gphn
Ldah
Aph1a
Dpp9
Stx16
Jakmip1
Csnk1g2
Nudt9
Pomgnt2
Maob
Camk1d
Aldh5a1
Arrb1
Slc38a7
Ptges2
Pithd1
Acaa2
Dip2a
Rbbp5
Pgam5
Gemin5
Agap1
Pigt
Slc7a14
Osbpl6
Usp47
Slc44a2
Poglut1
Tnr
Nlgn3
Cadps2
Dnm3
Pgm5
Anapc2
Wwp1
Lrrc4c
Camkk2
Vps26b
Agps
Atg16l1
Paox
Sipa1l1
Lnpep
Slc39a6
Prepl
Cers6
Septin11
Shisa7
Gpr158
Pex5l
Inpp5k
Clmn
Septin10
Peli1
Vps52
Crbn
Trim9
Uba6
Myef2
Uba3
Scai
Ank2
Elfn1
Tmem163
Pde10a
Immt
Cnst
Ephb1
Rnf170
Abi1
Synpo
Vps53
Prpf31
Macroh2a2
Bcas3
Nemf
Pabpn1
Tab1
Sulf2
Nedd4l
Cdc34
C1ql2
H6pd
C1ra
Adprs
Akr7a2
Ppm1f
Slc43a2
Eprs1
Wdr47
Tcerg1
Lonp1
Gnal
Slc24a4
Calcoco1
Ogt
Trim32
Synj1
Rapgef2
Septin8
Mboat7
Pgp
Dpyd
Aldh4a1
Ngef
Epn2
Eif2b5
Bag5
Dis3l2
Ca12
Fermt2
Copa
Prmt5
Ppat
Pak2
Mical3
Crocc
Trip10
Stau2
Ago3
Ago2
Ago1
Plxnb1
Thtpa
Dner
Cdc73
Acad9
Afg3l2
Eif3b
Slc4a8
Lin7a
Slc25a1
Bdh2
Aldh1l2
Fnbp1l
Bclaf1
Scamp1
Trhde
Cyp51a1
Fgb
Meak7
Rtn4rl1
Unc13c
Dcun1d3
Cnot3
Fez1
Kiaa0319l
Pdxk
Cc2d1a
Stx5
Trnt1
Dnm1l
Pnpla8
Pnpt1
Adgrg1
Pacs1
Mmgt1
Sdha
Sirt5
Os9
Hacd3
Lsm14a
Manba
Agfg1
Slc38a1
Shtn1
Matr3
Lrrtm1
Plcl2
Mepce
Ahi1
Appl1
Irf2bpl
[truncated: 2,335 more rows]

## Sheet: mitoproteome database 02
Mitoproteome Database (Select MITO_ID for details on gene/protein of interest)
MITO ID	Entrez Gene ID	Gene name	Symbol
MT001037	51166	aminoadipate aminotransferase	AADAT
MT001222	57505	alanyl-tRNA synthetase 2, mitochondrial	AARS2
MT000755	10157	aminoadipate-semialdehyde synthase	AASS
MT000001	18	4-aminobutyrate aminotransferase	ABAT
MT000939	26154	ATP-binding cassette, sub-family A (ABC1), member 12	ABCA12
MT000771	10351	ATP-binding cassette, sub-family A (ABC1), member 8	ABCA8
MT000770	10350	ATP-binding cassette, sub-family A (ABC1), member 9	ABCA9
MT000889	23456	ATP-binding cassette, sub-family B (MDR/TAP), member 10	ABCB10
MT000745	10058	ATP-binding cassette, sub-family B (MDR/TAP), member 6	ABCB6
MT000002	22	ATP-binding cassette, sub-family B (MDR/TAP), member 7	ABCB7
MT000843	11194	ATP-binding cassette, sub-family B (MDR/TAP), member 8	ABCB8
MT000025	215	ATP-binding cassette, sub-family D (ALD), member 1	ABCD1
MT000030	225	ATP-binding cassette, sub-family D (ALD), member 2	ABCD2
MT000522	5825	ATP-binding cassette, sub-family D (ALD), member 3	ABCD3
MT000538	6059	ATP-binding cassette, sub-family E (OABP), member 1	ABCE1
MT000747	10061	ATP-binding cassette, sub-family F (GCN20), member 2	ABCF2
MT000725	9619	ATP-binding cassette, sub-family G (WHITE), member 1	ABCG1
MT000707	9429	ATP-binding cassette, sub-family G (WHITE), member 2	ABCG2
MT001157	55347	abhydrolase domain containing 10	ABHD10
MT001375	83451	abhydrolase domain containing 11	ABHD11
MT001219	57406	abhydrolase domain containing 6	ABHD6
MT000003	25	ABL proto-oncogene 1, non-receptor tyrosine kinase	ABL1
MT000778	10449	acetyl-CoA acyltransferase 2	ACAA2
MT000004	31	acetyl-CoA carboxylase α	ACACA
MT000005	32	acetyl-CoA carboxylase β	ACACB
MT001358	80724	acyl-CoA dehydrogenase family, member 10	ACAD10
MT001390	84129	acyl-CoA dehydrogenase family, member 11	ACAD11
MT000954	27034	acyl-CoA dehydrogenase family, member 8	ACAD8
MT000979	28976	acyl-CoA dehydrogenase family, member 9	ACAD9
MT000006	33	acyl-CoA dehydrogenase, long chain	ACADL
MT000007	34	acyl-CoA dehydrogenase, C-4 to C-12 straight chain	ACADM
MT000008	35	acyl-CoA dehydrogenase, C-2 to C-3 short chain	ACADS
MT000009	36	acyl-CoA dehydrogenase, short/branched chain	ACADSB
MT000010	37	acyl-CoA dehydrogenase, very long chain	ACADVL
MT000011	38	acetyl-CoA acetyltransferase 1	ACAT1
MT001263	64746	acyl-CoA binding domain containing 3	ACBD3
MT000012	47	ATP citrate lyase	ACLY
MT001205	57001	ACN9 homolog (S. cerevisiae)	ACN9
MT000013	48	aconitase 1, soluble	ACO1
MT000014	50	aconitase 2, mitochondrial	ACO2
MT001183	55856	acyl-CoA thioesterase 13	ACOT13
MT000823	10965	acyl-CoA thioesterase 2	ACOT2
MT000852	11332	acyl-CoA thioesterase 7	ACOT7
MT000742	10005	acyl-CoA thioesterase 8	ACOT8
MT000900	23597	acyl-CoA thioesterase 9	ACOT9
MT000015	51	acyl-CoA oxidase 1, palmitoyl	ACOX1
MT000652	8310	acyl-CoA oxidase 3, pristanoyl	ACOX3
MT001039	51205	acid phosphatase 6, lysophosphatidic	ACP6
MT001363	81616	acyl-CoA synthetase bubblegum family member 2	ACSBG2
MT001347	80221	acyl-CoA synthetase family member 2	ACSF2
MT001585	197322	acyl-CoA synthetase family member 3	ACSF3
MT000216	2180	acyl-CoA synthetase long-chain family member 1	ACSL1
MT000217	2181	acyl-CoA synthetase long-chain family member 3	ACSL3
MT000218	2182	acyl-CoA synthetase long-chain family member 4	ACSL4
MT001070	51703	acyl-CoA synthetase long-chain family member 5	ACSL5
MT000879	23305	acyl-CoA synthetase long-chain family member 6	ACSL6
MT001497	116285	acyl-CoA synthetase medium-chain family member 1	ACSM1
MT001513	123876	acyl-CoA synthetase medium-chain family member 2A	ACSM2A
MT001644	348158	acyl-CoA synthetase medium-chain family member 2B	ACSM2B
MT000546	6296	acyl-CoA synthetase medium-chain family member 3	ACSM3
MT001640	341392	acyl-CoA synthetase medium-chain family member 4	ACSM4
MT001114	54988	acyl-CoA synthetase medium-chain family member 5	ACSM5
MT001555	142827	acyl-CoA synthetase medium-chain family member 6	ACSM6
MT001411	84532	acyl-CoA synthetase short-chain family member 1	ACSS1
MT001314	79611	acyl-CoA synthetase short-chain family member 3	ACSS3
MT000016	98	acylphosphatase 2, muscle type	ACYP2
MT000646	8038	ADAM metallopeptidase domain 12	ADAM12
MT001179	55803	ArfGAP with dual PH domains 2	ADAP2
MT001213	57143	aarF domain containing kinase 1	ADCK1
MT001456	90956	aarF domain containing kinase 2	ADCK2
MT001204	56997	aarF domain containing kinase 3	ADCK3
MT001335	79934	aarF domain containing kinase 4	ADCK4
MT001592	203054	aarF domain containing kinase 5	ADCK5
MT000017	128	alcohol dehydrogenase 5 (class III), chi polypeptide	ADH5
MT001545	137872	alcohol dehydrogenase, iron containing, 1	ADHFE1
MT001431	84890	2-aminoethanethiol (cysteamine) dioxygenase	ADO
MT001103	54936	ADP-ribosylhydrolase like 2	ADPRHL2
MT000961	27125	AF4/FMR2 family, member 4	AFF4
MT000819	10939	AFG3-like AAA ATPase 2	AFG3L2
MT001501	116986	ArfGAP with GTPase domain, ankyrin repeat and PH domain 2	AGAP2
MT001175	55750	acylglycerol kinase	AGK
MT001329	79814	agmatine ureohydrolase (agmatinase)	AGMAT
MT001154	55326	1-acylglycerol-3-phosphate O-acyltransferase 5	AGPAT5
MT000662	8540	alkylglycerone phosphate synthase	AGPS
MT000791	10551	anterior gradient 2	AGR2
MT000877	23287	ATP/GTP binding protein 1	AGTPBP1
MT000018	189	alanine-glyoxylate aminotransferase	AGXT
MT001271	64902	alanine--glyoxylate aminotransferase 2	AGXT2
MT000696	9131	apoptosis-inducing factor, mitochondrion-associated, 1	AIFM1
MT001430	84883	apoptosis-inducing factor, mitochondrion-associated, 2	AIFM2
MT001559	150209	apoptosis-inducing factor, mitochondrion-associated, 3	AIFM3
MT000693	9049	aryl hydrocarbon receptor interacting protein	AIP
MT000019	204	adenylate kinase 2	AK2
MT001005	50808	adenylate kinase 3	AK3
MT000020	205	adenylate kinase 4	AK4
MT000648	8165	A kinase (PRKA) anchor protein 1	AKAP1
MT000846	11216	A kinase (PRKA) anchor protein 10	AKAP10
MT000766	10270	A kinase (PRKA) anchor protein 8	AKAP8
MT000021	207	v-akt murine thymoma viral oncogene homolog 1	AKT1
MT000741	10000	v-akt murine thymoma viral oncogene homolog 3	AKT3
MT000022	211	5'-aminolevulinate synthase 1	ALAS1
MT000023	212	5'-aminolevulinate synthase 2	ALAS2
MT000024	213	albumin	ALB
MT000526	5832	aldehyde dehydrogenase 18 family, member A1	ALDH18A1
MT000027	219	aldehyde dehydrogenase 1 family, member B1	ALDH1B1
MT000808	10840	aldehyde dehydrogenase 1 family, member L1	ALDH1L1
MT001571	160428	aldehyde dehydrogenase 1 family, member L2	ALDH1L2
MT000026	217	aldehyde dehydrogenase 2 family (mitochondrial)	ALDH2
MT000029	224	aldehyde dehydrogenase 3 family, member A2	ALDH3A2
MT000668	8659	aldehyde dehydrogenase 4 family, member A1	ALDH4A1
MT000640	7915	aldehyde dehydrogenase 5 family, member A1	ALDH5A1
MT000361	4329	aldehyde dehydrogenase 6 family, member A1	ALDH6A1
MT000050	501	aldehyde dehydrogenase 7 family, member A1	ALDH7A1
MT000028	223	aldehyde dehydrogenase 9 family, member A1	ALDH9A1
MT000031	230	aldolase C, fructose-bisphosphate	ALDOC
MT000685	8846	alkB, alkylation repair homolog 1 (E. coli)	ALKBH1
MT001599	221120	alkB, alkylation repair homolog 3 (E. coli)	ALKBH3
MT001397	84266	alkB, alkylation repair homolog 7 (E. coli)	ALKBH7
MT000032	239	arachidonate 12-lipoxygenase	ALOX12
MT000901	23600	α-methylacyl-CoA racemase	AMACR
MT001166	55626	autophagy/beclin-1 regulator 1	AMBRA1
MT000033	275	aminomethyltransferase	AMT
MT000037	301	annexin A1	ANXA1
MT000844	11199	annexin A10	ANXA10
MT000121	1173	adaptor-related protein complex 2, mu 1 subunit	AP2M1
MT000039	328	APEX nuclease (multifunctional DNA repair enzyme) 1	APEX1
MT000969	27301	APEX nuclease (apurinic/apyrimidinic endonuclease) 2	APEX2
MT001524	128240	apolipoprotein A-I binding protein	APOA1BP
MT001307	79135	apolipoprotein O	APOO
MT001548	139322	apolipoprotein O-like	APOOL
MT001408	84334	apoptogenic 1, mitochondrial	APOPT1
MT000040	369	A-Raf proto-oncogene, serine/threonine kinase	ARAF
MT000041	384	arginase 2	ARG2
MT001131	55082	arginine and glutamate rich 1	ARGLU1
MT000042	402	ADP-ribosylation factor-like 2	ARL2
MT000896	23568	ADP-ribosylation factor-like 2 binding protein	ARL2BP
MT000790	10550	ADP-ribosylation factor-like 6 interacting protein 5	ARL6IP5
MT001137	55156	armadillo repeat containing 1	ARMC1
MT001382	83787	armadillo repeat containing 10	ARMC10
MT001061	51566	armadillo repeat containing, X-linked 3	ARMCX3
MT001653	387715	age-related maculopathy susceptibility 2	ARMS2
MT000043	409	arrestin, β 2	ARRB2
MT000044	411	arylsulfatase B	ARSB
MT001220	57412	arsenite methyltransferase	AS3MT
MT001193	56624	N-acylsphingosine amidohydrolase (non-lysosomal ceramidase)	ASAH2
MT001550	140462	ankyrin repeat and SOCS box containing 9	ASB9
MT000045	445	argininosuccinate synthase 1	ASS1
MT001432	84896	ATPase family, AAA domain containing 1	ATAD1
MT001145	55210	ATPase family, AAA domain containing 3A	ATAD3A
MT001384	83858	ATPase family, AAA domain containing 3B	ATAD3B
MT001441	85300	ataxia, cerebellar, Cayman type	ATCAY
MT000150	1386	activating transcription factor 2	ATF2
MT000697	9140	autophagy related 12	ATG12
MT000869	23130	autophagy related 2A	ATG2A
MT001133	55102	autophagy related 2B	ATG2B
MT001259	64422	autophagy related 3	ATG3
MT001490	115201	autophagy related 4A, cysteine peptidase	ATG4A
MT000872	23192	autophagy related 4B, cysteine peptidase	ATG4B
MT001435	84938	autophagy related 4C, cysteine peptidase	ATG4C
MT001438	84971	autophagy related 4D, cysteine peptidase	ATG4D
MT000711	9474	autophagy related 5	ATG5
MT000788	10533	autophagy related 7	ATG7
MT001303	79065	autophagy related 9A	ATG9A
MT000047	471	5-aminoimidazole-4-carboxamide ribonucleotide	ATIC
MT000048	487	ATPase, Ca++ transporting, cardiac muscle, fast twitch 1	ATP2A1
MT000049	498	ATP synthase, H+ transporting, mitochondrial F1 complex, α	ATP5A1
MT000051	506	ATP synthase, H+ transporting, mitochondrial F1 complex, β	ATP5B
MT000052	509	ATP synthase, H+ transporting, mitochondrial F1 complex, γ	ATP5C1
MT000053	513	ATP synthase, H+ transporting, mitochondrial F1 complex, δ	ATP5D
MT000054	514	ATP synthase, H+ transporting, mitochondrial F1 complex, ε	ATP5E
MT001670	432369	ATP synthase, H+ transporting, mitochondrial F1 complex, ε	ATP5EP2
MT000055	515	ATP synthase, H+ transporting, mitochondrial Fo complex,	ATP5F1
MT000056	516	ATP synthase, H+ transporting, mitochondrial Fo complex,	ATP5G1
MT000057	517	ATP synthase, H+ transporting, mitochondrial Fo complex,	ATP5G2
MT000058	518	ATP synthase, H+ transporting, mitochondrial Fo complex,	ATP5G3
MT000783	10476	ATP synthase, H+ transporting, mitochondrial Fo complex,	ATP5H
MT000059	521	ATP synthase, H+ transporting, mitochondrial Fo complex,	ATP5I
MT000060	522	ATP synthase, H+ transporting, mitochondrial Fo complex,	ATP5J
MT000720	9551	ATP synthase, H+ transporting, mitochondrial Fo complex,	ATP5J2
MT000798	10632	ATP synthase, H+ transporting, mitochondrial Fo complex,	ATP5L
MT001614	267020	ATP synthase, H+ transporting, mitochondrial Fo complex,	ATP5L2
MT000064	539	ATP synthase, H+ transporting, mitochondrial F1 complex, O	ATP5O
MT000959	27109	ATP synthase, H+ transporting, mitochondrial Fo complex,	ATP5S
MT001132	55101	ATP5S-like	ATP5SL
MT000368	4508	['ATP synthase F0 subunit 6']	ATP6
MT000061	523	ATPase, H+ transporting, lysosomal 70kDa, V1 subunit A	ATP6V1A
MT000062	529	ATPase, H+ transporting, lysosomal 31kDa, V1 subunit E1	ATP6V1E1
MT000063	538	ATPase, Cu++ transporting, α polypeptide	ATP7A
MT000065	540	ATPase, Cu++ transporting, β polypeptide	ATP7B
MT000369	4509	['ATP synthase F0 subunit 8']	ATP8
MT001265	64756	ATP synthase mitochondrial F1 complex assembly factor 1	ATPAF1
MT001462	91647	ATP synthase mitochondrial F1 complex assembly factor 2	ATPAF2
MT001476	93974	ATPase inhibitory factor 1	ATPIF1
MT000359	4287	ataxin 3	ATXN3
MT000066	549	AU RNA binding protein/enoyl-CoA hydratase	AUH
MT001117	54998	aurora kinase A interacting protein 1	AURKAIP1
MT000067	551	arginine vasopressin	AVP
MT001484	113451	antizyme inhibitor 2	AZIN2
MT000068	572	BCL2-associated agonist of cell death	BAD
MT000069	573	BCL2-associated athanogene	BAG1
MT000718	9529	BCL2-associated athanogene 5	BAG5
MT000070	578	BCL2-antagonist/killer 1	BAK1
MT000071	581	BCL2-associated X protein	BAX
MT000960	27113	BCL2 binding component 3	BBC3
MT000656	8424	butyroβine (γ), 2-oxoglutarate dioxygenase (γ-butyroβine	BBOX1
MT000754	10134	B-cell receptor-associated protein 31	BCAP31
MT000072	586	branched chain amino-acid transaminase 1, cytosolic	BCAT1
MT000073	587	branched chain amino-acid transaminase 2, mitochondrial	BCAT2
MT000074	593	branched chain keto acid dehydrogenase E1, α polypeptide	BCKDHA
MT000075	594	branched chain keto acid dehydrogenase E1, β polypeptide	BCKDHB
MT000767	10295	branched chain ketoacid dehydrogenase kinase	BCKDK
MT000076	596	B-cell CLL/lymphoma 2	BCL2
MT000077	597	BCL2-related protein A1	BCL2A1
MT000078	598	BCL2-like 1	BCL2L1
MT000743	10017	BCL2-like 10 (apoptosis facilitator)	BCL2L10
MT000744	10018	BCL2-like 11 (apoptosis facilitator)	BCL2L11
MT000908	23786	BCL2-like 13 (apoptosis facilitator)	BCL2L13
MT000079	599	BCL2-like 2	BCL2L2
MT001385	83875	β-carotene oxygenase 2	BCO2
MT000080	617	BC1 (ubiquinol-cytochrome c reductase) synthesis-like	BCS1L
MT000081	622	3-hydroxybutyrate dehydrogenase, type 1	BDH1
MT001195	56898	3-hydroxybutyrate dehydrogenase, type 2	BDH2
MT000082	627	brain-derived neurotrophic factor	BDNF
MT000670	8678	beclin 1, autophagy related	BECN1
MT000083	631	beaded filament structural protein 1, filensin	BFSP1
MT001578	168620	basic helix-loop-helix family, member a15	BHLHA15
MT000084	637	BH3 interacting domain death agonist	BID
MT000085	638	BCL2-interacting killer (apoptosis-inducing)	BIK
MT001669	414899	BH3-like motif containing, cell death inducer	BLID
MT000243	2647	biogenesis of lysosomal organelles complex-1, subunit 1	BLOC1S1
MT001616	282991	biogenesis of lysosomal organelles complex-1, subunit 2	BLOC1S2
MT001451	90427	Bcl2 modifying factor	BMF
MT000086	662	BCL2/adenovirus E1B 19kDa interacting protein 1	BNIP1
MT000087	664	BCL2/adenovirus E1B 19kDa interacting protein 3	BNIP3
MT000088	665	BCL2/adenovirus E1B 19kDa interacting protein 3-like	BNIP3L
MT000089	666	BCL2-related ovarian killer	BOK
MT001018	51027	bolA family member 1	BOLA1
MT001698	100294715	Polymicrogyria, bilateral occipital	BOP
MT000090	670	biphenyl hydrolase-like (serine hydrolase)	BPHL
MT000091	673	B-Raf proto-oncogene, serine/threonine kinase	BRAF
MT000816	10902	bromodomain containing 8	BRD8
MT001551	140707	BRI3 binding protein	BRI3BP
MT001636	339479	bone morphogenetic protein/retinoic acid inducible neural-	BRINP3
MT000703	9256	benzodiazepine receptor (peripheral) associated protein 1	BZRAP1
MT000836	11067	chromosome 10 open reading frame 10	C10orf10
MT001235	60314	chromosome 12 open reading frame 10	C12orf10
MT001461	91574	chromosome 12 open reading frame 65	C12orf65
MT001123	55017	chromosome 14 open reading frame 119	C14orf119
MT001338	80017	chromosome 14 open reading frame 159	C14orf159
MT000722	9556	chromosome 14 open reading frame 2	C14orf2
MT001682	643338	chromosome 15 open reading frame 62	C15orf62
MT001625	284184	chromosome 17 open reading frame 89	C17orf89
MT001377	83636	chromosome 19 open reading frame 12	C19orf12
MT001520	125988	chromosome 19 open reading frame 70	C19orf70
MT000095	708	complement component 1, q subcomponent binding protein	C1QBP
MT000650	8209	chromosome 21 open reading frame 33	C21orf33
MT001309	79568	chromosome 2 open reading frame 47	C2orf47
MT001665	401207	chromosome 5 open reading frame 63	C5orf63
MT001601	221545	chromosome 6 open reading frame 136	C6orf136
MT001042	51250	chromosome 6 open reading frame 203	C6orf203
MT001567	154791	chromosome 7 open reading frame 55	C7orf55
MT001399	84270	chromosome 9 open reading frame 89	C9orf89
MT000097	763	carbonic anhydrase VA, mitochondrial	CA5A
MT000849	11238	carbonic anhydrase VB, mitochondrial	CA5B
MT001639	340591	carbonic anhydrase VB pseudogene 1	CA5BP1
MT001442	85438	calcium-binding protein, spermatid-specific 1	CABS1
MT000099	815	calcium/calmodulin-dependent protein kinase II α	CAMK2A
MT000100	821	calnexin	CANX
MT000840	11132	calpain 10	CAPN10
MT001294	65981	caprin family member 2	CAPRIN2
MT001173	55739	carbohydrate kinase domain containing	CARKD
MT001311	79587	cysteinyl-tRNA synthetase 2, mitochondrial (putative)	CARS2
MT000101	834	caspase 1, apoptosis-related cysteine peptidase	CASP1
MT000102	835	caspase 2, apoptosis-related cysteine peptidase	CASP2
MT000103	836	caspase 3, apoptosis-related cysteine peptidase	CASP3
MT000104	837	caspase 4, apoptosis-related cysteine peptidase	CASP4
MT000105	840	caspase 7, apoptosis-related cysteine peptidase	CASP7
MT000106	841	caspase 8, apoptosis-related cysteine peptidase	CASP8
MT000739	9994	caspase 8 associated protein 2	CASP8AP2
MT000107	842	caspase 9, apoptosis-related cysteine peptidase	CASP9
MT000108	844	calsequestrin 1 (fast-twitch, skeletal muscle)	CASQ1
MT000109	847	catalase	CAT
MT000110	858	caveolin 2	CAV2
MT001428	84869	carbonyl reductase 4	CBR4
MT001230	57805	cell cycle and apoptosis regulator 2	CCAR2
MT001189	56267	cysteine conjugate-β lyase 2	CCBL2
MT001121	55013	coiled-coil domain containing 109B	CCDC109B
MT001264	64753	coiled-coil domain containing 136	CCDC136
MT001320	79714	coiled-coil domain containing 51	CCDC51
MT001531	131076	coiled-coil domain containing 58	CCDC58
MT001239	60492	coiled-coil domain containing 90B	CCDC90B
MT000112	885	cholecystokinin	CCK
MT000795	10574	chaperonin containing TCP1, subunit 7 (eta)	CCT7
MT001693	100133941	CD24 molecule	CD24
MT000810	10849	CD3e molecule, ε associated protein	CD3EAP
MT000113	983	cyclin-dependent kinase 1	CDK1
MT000114	1022	cyclin-dependent kinase 7	CDK7
MT000115	1029	cyclin-dependent kinase inhibitor 2A	CDKN2A
MT000676	8760	CDP-diacylglycerol synthase (phosphatidate	CDS2
MT000116	1050	CCAAT/enhancer binding protein (C/EBP), α	CEBPA
MT000974	27440	cat eye syndrome chromosome region, candidate 5	CECR5
MT001433	84902	centrosomal protein 89kDa	CEP89
MT001267	64781	ceramide kinase	CERK
MT000911	25790	cilia and flagella associated protein 45	CFAP45
MT000117	1103	choline O-acetyltransferase	CHAT
MT001503	118487	coiled-coil-helix-coiled-coil-helix domain containing 1	CHCHD1
MT001663	400916	coiled-coil-helix-coiled-coil-helix domain containing 10	CHCHD10
MT001036	51142	coiled-coil-helix-coiled-coil-helix domain containing 2	CHCHD2
MT001684	645345	coiled-coil-helix-coiled-coil-helix domain containing 2	CHCHD2P9
MT001101	54927	coiled-coil-helix-coiled-coil-helix domain containing 3	CHCHD3
MT001533	131474	coiled-coil-helix-coiled-coil-helix domain containing 4	CHCHD4
MT001398	84269	coiled-coil-helix-coiled-coil-helix domain containing 5	CHCHD5
MT001405	84303	coiled-coil-helix-coiled-coil-helix domain containing 6	CHCHD6
MT001308	79145	coiled-coil-helix-coiled-coil-helix domain containing 7	CHCHD7
MT001158	55349	choline dehydrogenase	CHDH
MT000928	25978	charged multivesicular body protein 2B	CHMP2B
MT001310	79586	chondroitin polymerizing factor	CHPF
MT001207	57019	cytokine induced apoptosis inhibitor 1	CIAPIN1
MT000118	1149	cell death-inducing DFFA-like effector a	CIDEA
MT001181	55847	CDGSH iron sulfur domain 1	CISD1
MT001678	493856	CDGSH iron sulfur domain 2	CISD2
MT001622	284106	CDGSH iron sulfur domain 3	CISD3
MT000119	1152	creatine kinase, brain	CKB
MT001679	548596	creatine kinase, mitochondrial 1A	CKMT1A
MT000120	1160	creatine kinase, mitochondrial 2 (sarcomeric)	CKMT2
MT000123	1192	chloride intracellular channel 1	CLIC1
MT000922	25932	chloride intracellular channel 4	CLIC4
MT000125	1201	ceroid-lipofuscinosis, neuronal 3	CLN3
MT000208	2055	ceroid-lipofuscinosis, neuronal 8 (epilepsy, progressive	CLN8
MT001362	81570	ClpB caseinolytic peptidase B homolog (E. coli)	CLPB
MT000649	8192	caseinolytic mitochondrial matrix peptidase proteolytic	CLPP
MT000809	10845	caseinolytic mitochondrial matrix peptidase chaperone	CLPX
MT000126	1213	clathrin, heavy chain (Hc)	CLTC
MT000876	23277	clustered mitochondria (cluA/CLU1) homolog	CLUH
MT001580	171425	citrate lyase β like	CLYBL
MT001563	152100	C-x(9)-C motif containing 1	CMC1
MT001198	56942	C-x(9)-C motif containing 2	CMC2
MT001696	100272147	C-x(9)-C motif containing 4	CMC4
MT001528	129607	cytidine monophosphate (UMP-CMP) kinase 2, mitochondrial	CMPK2
MT000127	1267	2',3'-cyclic nucleotide 3' phosphodiesterase	CNP
MT001174	55744	cytochrome c oxidase assembly factor 1 homolog (S.	COA1
MT000976	28958	cytochrome c oxidase assembly factor 3	COA3
MT001049	51287	cytochrome c oxidase assembly factor 4 homolog (S.	COA4
MT001677	493753	cytochrome c oxidase assembly factor 5	COA5
MT001656	388753	cytochrome c oxidase assembly factor 6	COA6
MT001293	65260	cytochrome c oxidase assembly factor 7 (putative)	COA7
MT001357	80347	CoA synthase	COASY
MT000749	10087	collagen, type IV, α 3 (Goodpasture antigen) binding	COL4A3BP
MT000128	1312	catechol-O-methyltransferase	COMT
MT001505	118881	catechol-O-methyltransferase domain containing 1	COMTD1
MT001474	93058	coenzyme Q10 homolog A (S. cerevisiae)	COQ10A
MT001346	80219	coenzyme Q10 homolog B (S. cerevisiae)	COQ10B
MT000966	27235	coenzyme Q2 4-hydroxybenzoate polyprenyltransferase	COQ2
MT001075	51805	coenzyme Q3 methyltransferase	COQ3
MT001035	51117	coenzyme Q4	COQ4
MT001401	84274	coenzyme Q5 homolog, methyltransferase (S. cerevisiae)	COQ5
MT001009	51004	coenzyme Q6 monooxygenase	COQ6
MT000760	10229	coenzyme Q7 homolog, ubiquinone (yeast)	COQ7
MT001206	57017	coenzyme Q9	COQ9
MT000370	4512	['cytochrome c oxidase subunit I']	COX1
MT000141	1352	COX10 heme A:farnesyltransferase cytochrome c oxidase	COX10
MT000142	1353	COX11 cytochrome c oxidase copper chaperone	COX11
MT001439	84987	COX14 cytochrome c oxidase assembly factor	COX14
MT000143	1355	cytochrome c oxidase assembly homolog 15 (yeast)	COX15
MT001041	51241	COX16 cytochrome c oxidase assembly homolog (S. cerevisiae)	COX16
MT000748	10063	COX17 cytochrome c oxidase copper chaperone	COX17
MT001632	285521	COX18 cytochrome c oxidase assembly factor	COX18
MT000371	4513	['cytochrome c oxidase subunit II']	COX2
MT001496	116228	COX20 cytochrome c oxidase assembly factor	COX20
MT000372	4514	cytochrome c oxidase III	COX3
MT000129	1327	cytochrome c oxidase subunit IV isoform 1	COX4I1
MT001419	84701	cytochrome c oxidase subunit IV isoform 2 (lung)	COX4I2
MT000705	9377	cytochrome c oxidase subunit Va	COX5A
MT000130	1329	cytochrome c oxidase subunit Vb	COX5B
MT000131	1337	cytochrome c oxidase subunit VIa polypeptide 1	COX6A1
MT000132	1339	cytochrome c oxidase subunit VIa polypeptide 2	COX6A2
MT000133	1340	cytochrome c oxidase subunit VIb polypeptide 1 (ubiquitous)	COX6B1
MT001519	125965	cytochrome c oxidase subunit VIb polypeptide 2 (testis)	COX6B2
MT000134	1345	cytochrome c oxidase subunit VIc	COX6C
MT000135	1346	cytochrome c oxidase subunit VIIa polypeptide 1 (muscle)	COX7A1
MT000136	1347	cytochrome c oxidase subunit VIIa polypeptide 2 (liver)	COX7A2
MT000699	9167	cytochrome c oxidase subunit VIIa polypeptide 2 like	COX7A2L
MT000137	1348	cytochrome c oxidase subunit VIIa polypeptide 2 (liver)	COX7A2P2
MT000138	1349	cytochrome c oxidase subunit VIIb	COX7B
MT001579	170712	cytochrome c oxidase subunit VIIb2	COX7B2
MT000139	1350	cytochrome c oxidase subunit VIIc	COX7C
MT000140	1351	cytochrome c oxidase subunit VIIIA (ubiquitous)	COX8A
MT001641	341947	cytochrome c oxidase subunit VIIIC	COX8C
MT000144	1371	coproporphyrinogen oxidase	CPOX
MT000145	1373	carbamoyl-phosphate synthase 1, mitochondrial	CPS1
MT000146	1374	carnitine palmitoyltransferase 1A (liver)	CPT1A
MT000147	1375	carnitine palmitoyltransferase 1B (muscle)	CPT1B
MT001521	126129	carnitine palmitoyltransferase 1C	CPT1C
MT000148	1376	carnitine palmitoyltransferase 2	CPT2
MT000149	1384	carnitine O-acetyltransferase	CRAT
MT001093	54675	cardiolipin synthase 1	CRLS1
MT001094	54677	carnitine O-octanoyltransferase	CROT
MT000151	1407	cryptochrome circadian clock 1	CRY1
MT000152	1410	crystallin, α B	CRYAB
MT000153	1428	crystallin, mu	CRYM
MT000154	1431	citrate synthase	CS
MT000638	7812	cold shock domain containing E1, RNA-binding	CSDE1
MT001191	56474	CTP synthase 2	CTPS2
MT000488	5476	cathepsin A	CTSA
MT000157	1508	cathepsin B	CTSB
MT001449	90353	cytosolic thiouridylase subunit 1	CTU1
MT001645	348180	cytosolic thiouridylase subunit 2 homolog (S. pombe)	CTU2
MT000158	1525	coxsackie virus and adenovirus receptor	CXADR
MT001612	256643	chromosome X open reading frame 23	CXorf23
MT000159	1528	cytochrome b5 type A (microsomal)	CYB5A
MT001360	80777	cytochrome b5 type B (outer mitochondrial membrane)	CYB5B
MT001071	51706	cytochrome b5 reductase 1	CYB5R1
MT001069	51700	cytochrome b5 reductase 2	CYB5R2
MT000183	1727	cytochrome b5 reductase 3	CYB5R3
MT000160	1535	cytochrome b-245, α polypeptide	CYBA
MT000161	1536	cytochrome b-245, β polypeptide	CYBB
MT000162	1537	cytochrome c-1	CYC1
MT001081	54205	cytochrome c, somatic	CYCS
MT000167	1583	cytochrome P450, family 11, subfamily A, polypeptide 1	CYP11A1
MT000168	1584	cytochrome P450, family 11, subfamily B, polypeptide 1	CYP11B1
MT000169	1585	cytochrome P450, family 11, subfamily B, polypeptide 2	CYP11B2
MT000170	1586	cytochrome P450, family 17, subfamily A, polypeptide 1	CYP17A1
MT000163	1543	cytochrome P450, family 1, subfamily A, polypeptide 1	CYP1A1
MT000164	1545	cytochrome P450, family 1, subfamily B, polypeptide 1	CYP1B1
MT000171	1591	cytochrome P450, family 24, subfamily A, polypeptide 1	CYP24A1
MT000172	1593	cytochrome P450, family 27, subfamily A, polypeptide 1	CYP27A1
MT000173	1594	cytochrome P450, family 27, subfamily B, polypeptide 1	CYP27B1
MT000165	1565	cytochrome P450, family 2, subfamily D, polypeptide 6	CYP2D6
MT000166	1571	cytochrome P450, family 2, subfamily E, polypeptide 1	CYP2E1
MT000374	4519	['cytochrome b']	CYTB
MT001686	728294	D-2-hydroxyglutarate dehydrogenase	D2HGDH
MT001577	168002	dishevelled-binding antagonist of β-catenin 2	DACT2
MT000174	1610	D-amino-acid oxidase	DAO
MT001613	267012	D-amino acid oxidase activator	DAOA
MT000639	7818	death associated protein 3	DAP3
MT001138	55157	aspartyl-tRNA synthetase 2, mitochondrial	DARS2
MT000175	1622	diazepam binding inhibitor (GABA receptor modulator, acyl-	DBI
MT000176	1629	dihydrolipoamide branched chain transacylase E2	DBT
MT000683	8816	DDB1 and CUL4 associated factor 5	DCAF5
MT001331	79877	dephospho-CoA kinase domain containing	DCAKD
MT000977	28960	decapping enzyme, scavenger	DCPS
MT000897	23576	dimethylarginine dimethylaminohydrolase 1	DDAH1
MT000895	23564	dimethylarginine dimethylaminohydrolase 2	DDAH2
MT001089	54541	DNA-damage-inducible transcript 4	DDIT4
MT000706	9416	DEAD (Asp-Glu-Ala-Asp) box polypeptide 23	DDX23
MT001178	55794	DEAD (Asp-Glu-Ala-Asp) box polypeptide 28	DDX28
MT000178	1654	DEAD (Asp-Glu-Ala-Asp) box helicase 3, X-linked	DDX3X
MT000179	1666	2,4-dienoyl CoA reductase 1, mitochondrial	DECR1
MT000663	8560	δ(4)-desaturase, sphingolipid 1	DEGS1
MT001416	84649	diacylglycerol O-acyltransferase 2	DGAT2
MT000181	1716	deoxyguanosine kinase	DGUOK
MT001587	200895	dihydrofolate reductase-like 1	DHFRL1
MT000182	1723	dihydroorotate dehydrogenase (quinone)	DHODH
MT001494	115817	dehydrogenase/reductase (SDR family) member 1	DHRS1
MT000759	10202	dehydrogenase/reductase (SDR family) member 2	DHRS2
MT000815	10901	dehydrogenase/reductase (SDR family) member 4	DHRS4
MT001163	55526	dehydrogenase E1 and transketolase domain containing 1	DHTKD1
MT001085	54505	DEAH (Asp-Glu-Ala-His) box polypeptide 29	DHX29
MT000861	22907	DEAH (Asp-Glu-Ala-His) box helicase 30	DHX30
MT001177	55760	DEAH (Asp-Glu-Ala-His) box polypeptide 32	DHX32
MT001457	90957	DEAH (Asp-Glu-Ala-Asp/His) box polypeptide 57	DHX57
MT001192	56616	diablo, IAP-binding mitochondrial protein	DIABLO
MT000184	1730	diaphanous-related formin 2	DIAPH2
MT000965	27185	disrupted in schizophrenia 1	DISC1
MT000185	1737	dihydrolipoamide S-acetyltransferase	DLAT
MT000186	1738	dihydrolipoamide dehydrogenase	DLD
MT000187	1743	dihydrolipoamide S-succinyltransferase (E2 component of 2-	DLST
MT000998	29958	dimethylglycine dehydrogenase	DMGDH
MT000189	1760	dystrophia myotonica-protein kinase	DMPK
MT000190	1763	DNA replication helicase/nuclease 2	DNA2
MT000297	3301	DnaJ (Hsp40) homolog, subfamily A, member 1	DNAJA1
MT000695	9093	DnaJ (Hsp40) homolog, subfamily A, member 3	DNAJA3
MT001172	55735	DnaJ (Hsp40) homolog, subfamily C, member 11	DNAJC11
MT000990	29103	DnaJ (Hsp40) homolog, subfamily C, member 15	DNAJC15
MT001532	131118	DnaJ (Hsp40) homolog, subfamily C, member 19	DNAJC19
MT001048	51277	DnaJ (Hsp40) homolog, subfamily C, member 27	DNAJC27
MT001403	84277	DnaJ (Hsp40) homolog, subfamily C, member 30	DNAJC30
MT000308	3338	DnaJ (Hsp40) homolog, subfamily C, member 4	DNAJC4
MT001356	80331	DnaJ (Hsp40) homolog, subfamily C, member 5	DNAJC5
MT001687	728489	DNL-type zinc finger	DNLZ
MT000746	10059	dynamin 1-like	DNM1L
MT000933	26052	dynamin 3	DNM3
MT000191	1808	dihydropyrimidinase-like 2	DPYSL2
MT000192	1819	developmentally regulated GTP binding protein 2	DRG2
MT000193	1832	desmoplakin	DSP
MT000194	1841	deoxythymidylate kinase (thymidylate kinase)	DTYMK
MT001100	54920	dihydrouridine synthase 2	DUS2
MT001245	63904	dual specificity phosphatase 21	DUSP21
MT001299	78986	dual specificity phosphatase 26 (putative)	DUSP26
MT000195	1854	deoxyuridine triphosphatase	DUT
MT000667	8655	dynein, light chain, LC8-type 1	DYNLL1
MT001552	140735	dynein, light chain, LC8-type 2	DYNLL2
MT000196	1869	E2F transcription factor 1	E2F1
MT001514	124454	glutamyl-tRNA synthetase 2, mitochondrial	EARS2
MT000198	1891	enoyl CoA hydratase 1, peroxisomal	ECH1
MT001149	55268	enoyl CoA hydratase domain containing 2	ECHDC2
MT001323	79746	enoyl CoA hydratase domain containing 3	ECHDC3
MT000199	1892	enoyl CoA hydratase, short chain, 1, mitochondrial	ECHS1
MT000177	1632	enoyl-CoA δ isomerase 1	ECI1
MT000780	10455	enoyl-CoA δ isomerase 2	ECI2
MT001050	51295	ECSIT signalling integrator	ECSIT
MT001243	60678	eukaryotic elongation factor, selenocysteine-tRNA-specific	EEFSEC
MT001352	80303	EF-hand domain family, member D1	EFHD1
MT000200	1962	enoyl-CoA, hydratase/3-hydroxyacyl CoA dehydrogenase	EHHADH
MT001241	60528	elaC ribonuclease Z 2	ELAC2
MT000201	2002	ELK1, member of ETS oncogene family	ELK1
MT000202	2004	ELK3, ETS-domain protein (SRF accessory protein 2)	ELK3
MT000203	2006	elastin	ELN
MT000730	9694	ER membrane protein complex subunit 2	EMC2
MT000769	10328	ER membrane protein complex subunit 8	EMC8
MT000205	2021	endonuclease G	ENDOG
MT001164	55556	enolase superfamily member 1	ENOSF1
MT000206	2034	endothelial PAS domain protein 1	EPAS1
MT000207	2043	EPH receptor A4	EPHA4
MT000945	26284	Era-like 12S mitochondrial rRNA chaperone 1	ERAL1
MT000209	2066	erb-b2 receptor tyrosine kinase 4	ERBB4
MT001649	375748	excision repair cross-complementation group 6-like 2	ERCC6L2
MT000210	2081	endoplasmic reticulum to nucleus signaling 1	ERN1
MT000211	2100	estrogen receptor 2 (ER β)	ESR2
MT000212	2108	electron-transfer-flavoprotein, α polypeptide	ETFA
MT000213	2109	electron-transfer-flavoprotein, β polypeptide	ETFB
MT000214	2110	electron-transferring-flavoprotein dehydrogenase	ETFDH
MT000891	23474	ethylmalonic encephalopathy 1	ETHE1
MT001270	64850	ethanolamine-phosphate phospho-lyase	ETNPPL
MT000738	9941	endo/exonuclease (5'-3'), endonuclease G-like	EXOG
MT000215	2139	EYA transcriptional coactivator and phosphatase 2	EYA2
MT000337	3992	fatty acid desaturase 1	FADS1
MT001369	81889	fumarylacetoacetate hydrolase domain containing 1	FAHD1
MT001450	90362	family with sequence similarity 110, member B	FAM110B
MT001434	84908	family with sequence similarity 136, member A	FAM136A
MT000947	26355	family with sequence similarity 162, member A	FAM162A
MT001518	125228	family with sequence similarity 210, member A	FAM210A
MT000931	26017	family with sequence similarity 32, member A	FAM32A
MT000731	9750	family with sequence similarity 65, member B	FAM65B
MT001688	729533	family with sequence similarity 72, member A	FAM72A
MT000219	2189	Fanconi anemia, complementation group G	FANCG
MT000802	10667	phenylalanyl-tRNA synthetase 2, mitochondrial	FARS2
MT000220	2194	fatty acid synthase	FASN
MT000817	10922	Fas-activated serine/threonine kinase	FASTK
MT001316	79675	FAST kinase domains 1	FASTKD1
MT000858	22868	FAST kinase domains 2	FASTKD2
MT001304	79072	FAST kinase domains 3	FASTKD3
MT001240	60493	FAST kinase domains 5	FASTKD5
MT000942	26235	F-box and leucine-rich repeat protein 4	FBXL4
MT000912	25793	F-box protein 7	FBXO7
MT000221	2224	farnesyl diphosphate synthase	FDPS
MT000222	2230	ferredoxin 1	FDX1
MT001481	112812	ferredoxin 1-like	FDX1L
MT000223	2232	ferredoxin reductase	FDXR
MT000224	2235	ferrochelatase	FECH
MT000225	2237	flap structure-specific endonuclease 1	FEN1
MT000726	9638	fasciculation and elongation protein zeta 1 (zygin I)	FEZ1
MT000226	2268	FGR proto-oncogene, Src family tyrosine kinase	FGR
MT000227	2271	fumarate hydratase	FH
MT000228	2272	fragile histidine triad	FHIT
MT000698	9158	fibroblast growth factor (acidic) intracellular binding	FIBP
MT001016	51024	fission 1 (mitochondrial outer membrane) homolog (S.	FIS1
MT001527	128486	fat storage-inducing transmembrane protein 2	FITM2
MT000229	2288	FK506 binding protein 4, 59kDa	FKBP4
MT000907	23770	FK506 binding protein 8, 38kDa	FKBP8
MT001353	80308	flavin adenine dinucleotide synthetase 1	FLAD1
MT001588	201163	folliculin	FLCN
MT000981	28982	feline leukemia virus subgroup C cellular receptor 1	FLVCR1
MT001414	84624	fibronectin type III domain containing 1	FNDC1
MT000230	2308	forkhead box O1	FOXO1
MT001165	55572	FAD-dependent oxidoreductase domain containing 1	FOXRED1
MT000231	2356	folylpolyglutamate synthase	FPGS
MT001664	401024	fibrous sheath interacting protein 2	FSIP2
MT000234	2495	ferritin, heavy polypeptide 1	FTH1
MT001477	94033	ferritin mitochondrial	FTMT
MT000999	29960	FtsJ RNA methyltransferase homolog 2 (E. coli)	FTSJ2
MT001549	139341	FUN14 domain containing 1	FUNDC1
MT001296	65991	FUN14 domain containing 2	FUNDC2
MT000232	2395	frataxin	FXN
MT000235	2534	FYN proto-oncogene, Src family tyrosine kinase	FYN
MT001003	50486	G0/G1 switch 2	G0S2
MT000854	11337	GABA(A) receptor-associated protein	GABARAP
MT000904	23710	GABA(A) receptor-associated protein like 1	GABARAPL1
MT000855	11345	GABA(A) receptor-associated protein-like 2	GABARAPL2
MT000906	23766	GABA(A) receptors associated protein like 3, pseudogene	GABARAPL3
MT001452	90480	growth arrest and DNA-damage-inducible, γ interacting	GADD45GIP1
MT000237	2617	glycyl-tRNA synthetase	GARS
MT000469	5188	glutamyl-tRNA(Gln) amidotransferase, subunit B	GATB
MT001619	283459	glutamyl-tRNA(Gln) amidotransferase, subunit C	GATC
MT000238	2628	glycine amidinotransferase (L-arginine:glycine	GATM
MT000239	2631	glioblastoma amplified sequence	GBAS
MT000672	8729	golgi brefeldin A resistant guanine nucleotide exchange	GBF1
MT000890	23464	glycine C-acetyltransferase	GCAT
MT000240	2639	glutaryl-CoA dehydrogenase	GCDH
MT000241	2645	glucokinase (hexokinase 4)	GCK
MT000242	2646	glucokinase (hexokinase 4) regulator	GCKR
MT000250	2729	glutamate-cysteine ligase, catalytic subunit	GCLC
MT000251	2730	glutamate-cysteine ligase, modifier subunit	GCLM
MT000244	2653	glycine cleavage system protein H (aminomethyl carrier)	GCSH
MT001082	54332	ganglioside induced differentiation associated protein 1	GDAP1
MT001680	554250	growth differentiation factor 5 opposite strand	GDF5OS
MT000245	2671	growth factor, augmenter of liver regeneration	GFER
MT001443	85476	G elongation factor, mitochondrial 1	GFM1
MT001409	84340	G elongation factor, mitochondrial 2	GFM2
MT001301	79017	γ-glutamylcyclotransferase	GGCT
MT001676	449520	gametogenetin binding protein 1 (pseudogene)	GGNBP1
MT000957	27069	growth hormone inducible transmembrane protein	GHITM
MT001156	55340	GTPase, IMAP family member 5	GIMAP5
MT001568	155038	GTPase, IMAP family member 8	GIMAP8
MT000246	2697	gap junction protein, α 1, 43kDa	GJA1
MT000247	2710	glycerol kinase	GK
MT000248	2712	glycerol kinase 2	GK2
MT000249	2713	glycerol kinase 3 pseudogene	GK3P
MT000252	2731	glycine dehydrogenase (decarboxylating)	GLDC
MT001019	51031	glyoxalase domain containing 4	GLOD4
MT000254	2745	glutaredoxin (thioltransferase)	GLRX
MT001014	51022	glutaredoxin 2	GLRX2
MT001040	51218	glutaredoxin 5	GLRX5
MT000253	2744	glutaminase	GLS
MT000963	27165	glutaminase 2 (liver, mitochondrial)	GLS2
MT000255	2746	glutamate dehydrogenase 1	GLUD1
MT000256	2747	glutamate dehydrogenase 2	GLUD2
MT000257	2752	glutamate-ammonia ligase	GLUL
MT000765	10249	glycine-N-acyltransferase	GLYAT
MT001469	92292	glycine-N-acyltransferase-like 1	GLYATL1
MT001598	219970	glycine-N-acyltransferase-like 2	GLYATL2
MT001657	389396	glycine-N-acyltransferase-like 3	GLYATL3
MT001535	132158	glycerate kinase	GLYCTK
MT000258	2760	GM2 ganglioside activator	GM2A
MT000995	29925	GDP-mannose pyrophosphorylase B	GMPPB
MT000774	10399	guanine nucleotide binding protein (G protein), β	GNB2L1
MT001091	54552	guanine nucleotide binding protein-like 3 (nucleolar)-like	GNL3L
MT000657	8443	glyceronephosphate O-acyltransferase	GNPAT
MT001253	64083	golgi phosphoprotein 3 (coat-protein)	GOLPH3
MT000259	2806	glutamic-oxaloacetic transaminase 2, mitochondrial	GOT2
MT001229	57678	glycerol-3-phosphate acyltransferase, mitochondrial	GPAM
MT001561	150763	glycerol-3-phosphate acyltransferase 2, mitochondrial	GPAT2
MT000261	2819	glycerol-3-phosphate dehydrogenase 1 (soluble)	GPD1
MT000262	2820	glycerol-3-phosphate dehydrogenase 2 (mitochondrial)	GPD2
MT000263	2852	G protein-coupled estrogen receptor 1	GPER1
MT001185	55890	G protein-coupled receptor, class C, group 5, member C	GPRC5C
MT001421	84706	glutamic pyruvate transaminase (alanine aminotransferase) 2	GPT2
MT000264	2876	glutathione peroxidase 1	GPX1
MT000265	2879	glutathione peroxidase 4	GPX4
MT000870	23151	GRAM domain containing 4	GRAMD4
MT000266	2896	granulin	GRN
MT001350	80273	GrpE-like 1, mitochondrial (E. coli)	GRPEL1
MT001541	134266	GrpE-like 2, mitochondrial (E. coli)	GRPEL2
MT000268	2926	G-rich RNA sequence binding factor 1	GRSF1
MT001188	56169	gasdermin C	GSDMC
MT000269	2931	glycogen synthase kinase 3 α	GSK3A
MT000270	2932	glycogen synthase kinase 3 β	GSK3B
MT000271	2936	glutathione reductase	GSR
MT001647	373156	glutathione S-transferase kappa 1	GSTK1
MT000272	2950	glutathione S-transferase pi 1	GSTP1
MT000273	2954	glutathione S-transferase zeta 1	GSTZ1
MT001444	85865	GTP-binding protein 10 (putative)	GTPBP10
MT001420	84705	GTP binding protein 3 (mitochondrial)	GTPBP3
MT000986	29083	GTP-binding protein 8 (putative)	GTPBP8
MT001242	60558	GUF1 GTPase homolog (S. cerevisiae)	GUF1
MT000274	3002	granzyme B (granzyme 2, cytotoxic T-lymphocyte-associated	GZMB
MT000723	9563	hexose-6-phosphate dehydrogenase (glucose 1-dehydrogenase)	H6PD
MT000893	23498	3-hydroxyanthranilate 3,4-dioxygenase	HAAO
MT000279	3033	hydroxyacyl-CoA dehydrogenase	HADH
MT000277	3030	hydroxyacyl-CoA dehydrogenase/3-ketoacyl-CoA	HADHA
		thiolase/enoyl-CoA hydratase (trifunctional protein), α
MT000278	3032	hydroxyacyl-CoA dehydrogenase/3-ketoacyl-CoA	HADHB
		thiolase/enoyl-CoA hydratase (trifunctional protein), β
MT000276	3029	hydroxyacylglutathione hydrolase	HAGH
MT000691	9001	huntingtin-associated protein 1	HAP1
MT000887	23438	histidyl-tRNA synthetase 2, mitochondrial	HARS2
MT000781	10456	HCLS1 associated protein X-1	HAX1
MT000280	3052	holocytochrome c synthase	HCCS
MT000281	3054	host cell factor C1	HCFC1
MT000282	3059	hematopoietic cell-specific Lyn substrate 1	HCLS1
MT001012	51020	HD domain containing 2	HDDC2
MT001423	84717	hepatoma-derived growth factor-related protein 2	HDGFRP2
MT001373	81932	haloacid dehalogenase-like hydrolase domain containing 3	HDHD3
MT001134	55127	HEAT repeat containing 1	HEATR1
MT001006	50865	heme binding protein 1	HEBP1
MT000899	23593	heme binding protein 2	HEBP2
MT001056	51409	HemK methyltransferase family member 1	HEMK1
MT000687	8924	HECT and RLD domain containing E3 ubiquitin protein ligase	HERC2
MT000284	3082	hepatocyte growth factor (hepapoietin A; scatter factor)	HGF
MT000839	11112	3-hydroxyisobutyrate dehydrogenase	HIBADH
MT000943	26275	3-hydroxyisobutyryl-CoA hydrolase	HIBCH
MT000285	3091	hypoxia inducible factor 1, α subunit (basic helix-loop-	HIF1A
MT000929	25994	HIG1 hypoxia inducible domain family, member 1A	HIGD1A
MT001582	192286	HIG1 hypoxia inducible domain family, member 2A	HIGD2A
MT001417	84681	histidine triad nucleotide binding protein 2	HINT2
MT001542	135114	histidine triad nucleotide binding protein 3	HINT3
MT000286	3096	human immunodeficiency virus type I enhancer binding	HIVEP1
MT000287	3098	hexokinase 1	HK1
MT000288	3099	hexokinase 2	HK2
MT000289	3101	hexokinase 3 (white cell)	HK3
MT000290	3141	holocarboxylase synthetase (biotin-(proprionyl-CoA-	HLCS
MT000291	3155	3-hydroxymethyl-3-methylglutaryl-CoA lyase	HMGCL
MT000292	3158	3-hydroxy-3-methylglutaryl-CoA synthase 2 (mitochondrial)	HMGCS2
MT001482	112817	4-hydroxy-2-oxoglutarate aldolase 1	HOGA1
MT000293	3219	homeobox B9	HOXB9
MT000674	8739	harakiri, BCL2 interacting protein	HRK
MT000763	10247	heat-responsive protein 12	HRSP12
MT001560	150274	HscB mitochondrial iron-sulfur cluster co-chaperone	HSCB
MT000275	3028	hydroxysteroid (17-β) dehydrogenase 10	HSD17B10
MT000296	3295	hydroxysteroid (17-β) dehydrogenase 4	HSD17B4
MT000641	7923	hydroxysteroid (17-β) dehydrogenase 8	HSD17B8
MT000294	3283	hydroxy-δ-5-steroid dehydrogenase, 3 β- and steroid δ-	HSD3B1
MT000295	3284	hydroxy-δ-5-steroid dehydrogenase, 3 β- and steroid δ-	HSD3B2
MT001380	83693	hydroxysteroid dehydrogenase like 1	HSDL1
MT001396	84263	hydroxysteroid dehydrogenase like 2	HSDL2
MT001436	84941	hematopoietic SH2 domain containing	HSH2D
MT000304	3320	heat shock protein 90kDa α (cytosolic), class A member 1	HSP90AA1
MT000305	3326	heat shock protein 90kDa α (cytosolic), class B member 1	HSP90AB1
MT000298	3303	heat shock 70kDa protein 1A	HSPA1A
MT000299	3305	heat shock 70kDa protein 1-like	HSPA1L
MT000300	3306	heat shock 70kDa protein 2	HSPA2
MT000301	3308	heat shock 70kDa protein 4	HSPA4
MT000302	3309	heat shock 70kDa protein 5 (glucose-regulated protein,	HSPA5
MT000303	3313	heat shock 70kDa protein 9 (mortalin)	HSPA9
MT000962	27129	heat shock 27kDa protein family, member 7 (cardiovascular)	HSPB7
MT000306	3329	heat shock 60kDa protein 1 (chaperonin)	HSPD1
MT000307	3336	heat shock 10kDa protein 1	HSPE1
MT000972	27429	HtrA serine peptidase 2	HTRA2
MT000283	3064	huntingtin	HTT
MT001171	55699	isoleucyl-tRNA synthetase 2, mitochondrial	IARS2
MT001586	200205	IBA57, iron-sulfur cluster assembly homolog (S. cerevisiae)	IBA57
MT000309	3396	immature colon carcinoma transcript 1	ICT1
MT000310	3416	insulin-degrading enzyme	IDE
MT000311	3417	isocitrate dehydrogenase 1 (NADP+), soluble	IDH1
MT000312	3418	isocitrate dehydrogenase 2 (NADP+), mitochondrial	IDH2
MT000313	3419	isocitrate dehydrogenase 3 (NAD+) α	IDH3A
MT000314	3420	isocitrate dehydrogenase 3 (NAD+) β	IDH3B
MT000315	3421	isocitrate dehydrogenase 3 (NAD+) γ	IDH3G
MT000316	3422	isopentenyl-diphosphate δ isomerase 1	IDI1
MT000686	8870	immediate early response 3	IER3
MT000317	3429	interferon, α-inducible protein 27	IFI27
MT000236	2537	interferon, α-inducible protein 6	IFI6
MT000318	3433	interferon-induced protein with tetratricopeptide repeats 2	IFIT2
MT000319	3437	interferon-induced protein with tetratricopeptide repeats 3	IFIT3
MT000320	3479	insulin-like growth factor 1 (somatomedin C)	IGF1
MT000321	3609	interleukin enhancer binding factor 3, 90kDa	ILF3
MT001583	196294	IMP1 inner mitochondrial membrane peptidase-like (S.	IMMP1L
MT001387	83943	IMP2 inner mitochondrial membrane peptidase-like (S.	IMMP2L
MT000827	10989	inner membrane protein, mitochondrial	IMMT
MT001260	64423	inverted formin, FH2 and WH2 domain containing	INF2
MT000878	23288	IQ motif containing E	IQCE
MT000322	3658	iron-responsive element binding protein 2	IREB2
MT001689	730249	immunoresponsive 1 homolog (mouse)	IRG1
MT001365	81689	iron-sulfur cluster assembly 1	ISCA1
MT001510	122961	iron-sulfur cluster assembly 2	ISCA2
MT000892	23479	iron-sulfur cluster assembly enzyme	ISCU
MT000323	3670	ISL LIM homeobox 1	ISL1
MT001325	79763	isochorismatase domain containing 2	ISOC2
MT000324	3712	isovaleryl-CoA dehydrogenase	IVD
MT000814	10899	jumping translocation breakpoint	JTB
MT000325	3725	jun proto-oncogene	JUN
MT000924	25959	KN motif and ankyrin repeat domains 2	KANK2
MT000326	3735	lysyl-tRNA synthetase	KARS
MT000328	3767	potassium inwardly-rectifying channel, subfamily J, member	KCNJ11
MT000327	3764	potassium inwardly-rectifying channel, subfamily J, member	KCNJ8
MT001295	65987	potassium channel tetramerization domain containing 14	KCTD14
MT000735	9812	KIAA0141	KIAA0141
MT000729	9692	KIAA0391	KIAA0391
MT000938	26128	KIAA1279	KIAA1279
MT001359	80726	KIAA1683	KIAA1683
MT000865	23095	kinesin family member 1B	KIF1B
MT001691	100130097	kinesin family member 28, pseudogene	KIF28P
MT000512	5653	kallikrein-related peptidase 6	KLK6
MT000664	8564	kynurenine 3-monooxygenase (kynurenine 3-hydroxylase)	KMO
MT000329	3845	Kirsten rat sarcoma viral oncogene homolog	KRAS
MT000330	3852	keratin 5	KRT5
MT000689	8942	kynureninase	KYNU
MT001336	79944	L-2-hydroxyglutarate dehydrogenase	L2HGDH
MT001603	246269	lactation elevated 1	LACE1
MT001486	114294	lactamase, β	LACTB
MT001032	51110	lactamase, β 2	LACTB2
MT001020	51056	leucine aminopeptidase 3	LAP3
MT000880	23395	leucyl-tRNA synthetase 2, mitochondrial	LARS2
MT000331	3939	lactate dehydrogenase A	LDHA
MT000332	3945	lactate dehydrogenase B	LDHB
MT001584	197257	lactate dehydrogenase D	LDHD
MT000333	3954	leucine zipper-EF-hand containing transmembrane protein 1	LETM1
MT001546	137994	leucine zipper-EF-hand containing transmembrane protein 2	LETM2
MT000918	25875	LETM1 domain containing 1	LETMD1
MT000334	3958	lectin, galactoside-binding, soluble, 3	LGALS3
MT000831	11019	lipoic acid synthetase	LIAS
MT000335	3978	ligase I, DNA, ATP-dependent	LIG1
MT000336	3980	ligase III, DNA, ATP-dependent	LIG3
MT001658	389421	lin-28 homolog B (C. elegans)	LIN28B
MT000661	8513	lipase, gastric	LIPF
MT001062	51601	lipoyltransferase 1	LIPT1
MT001654	387787	lipoyl(octanoyl) transferase 2 (putative)	LIPT2
MT000338	4000	lamin A/C	LMNA
MT001705	102723830	uncharacterized LOC102723830	LOC102723830
MT000704	9361	lon peptidase 1, mitochondrial	LONP1
MT000871	23175	lipin 1	LPIN1
MT000339	4041	low density lipoprotein receptor-related protein 5	LRP5
MT000752	10128	leucine-rich pentatricopeptide repeat containing	LRPPRC
MT001651	376132	leucine rich repeat containing 10	LRRC10
MT001160	55379	leucine rich repeat containing 59	LRRC59
MT001516	125144	LRRC75A antisense RNA 1	LRRC75A-AS1
MT001319	79705	leucine-rich repeat kinase 1	LRRK1
MT001508	120892	leucine-rich repeat kinase 2	LRRK2
MT000340	4067	LYN proto-oncogene, Src family tyrosine kinase	LYN
MT000776	10434	lysophospholipase I	LYPLA1
MT001215	57149	LYR motif containing 1	LYRM1
MT001217	57226	LYR motif containing 2	LYRM2
MT001211	57128	LYR motif containing 4	LYRM4
MT001557	144363	LYR motif containing 5	LYRM5
MT001454	90624	LYR motif containing 7	LYRM7
MT001447	89876	MYCBP-associated, testis expressed 1	MAATS1
MT000982	28992	MACRO domain containing 1	MACROD1
MT001493	115416	mitochondrial assembly of ribosomal large subunit 1	MALSU1
MT000341	4124	mannosidase, α, class 2A, member 1	MAN2A1
MT000342	4128	monoamine oxidase A	MAOA
MT000343	4129	monoamine oxidase B	MAOB
MT000344	4131	microtubule-associated protein 1B	MAP1B
MT001413	84557	microtubule-associated protein 1 light chain 3 α	MAP1LC3A
MT001364	81631	microtubule-associated protein 1 light chain 3 β	MAP1LC3B
MT001681	643246	microtubule-associated protein 1 light chain 3 β 2	MAP1LC3B2
MT001673	440738	microtubule-associated protein 1 light chain 3 γ	MAP1LC3C
MT001144	55201	microtubule-associated protein 1S	MAP1S
MT000508	5604	mitogen-activated protein kinase kinase 1	MAP2K1
MT000509	5605	mitogen-activated protein kinase kinase 2	MAP2K2
MT000356	4214	mitogen-activated protein kinase kinase kinase 1, E3	MAP3K1
		ubiquitin protein ligase
MT000503	5594	mitogen-activated protein kinase 1	MAPK1
MT000507	5602	mitogen-activated protein kinase 10	MAPK10
MT000547	6300	mitogen-activated protein kinase 12	MAPK12
MT000155	1432	mitogen-activated protein kinase 14	MAPK14
MT000504	5595	mitogen-activated protein kinase 3	MAPK3
MT000505	5599	mitogen-activated protein kinase 8	MAPK8
MT000712	9479	mitogen-activated protein kinase 8 interacting protein 1	MAPK8IP1
MT000506	5601	mitogen-activated protein kinase 9	MAPK9
MT000345	4137	microtubule-associated protein tau	MAPT
MT000204	2011	MAP/microtubule affinity-regulating kinase 2	MARK2
MT000346	4141	methionyl-tRNA synthetase	MARS
MT001473	92935	methionyl-tRNA synthetase 2, mitochondrial	MARS2
MT000973	27430	methionine adenosyltransferase II, β	MAT2B
MT001223	57506	mitochondrial antiviral signaling protein	MAVS
MT000971	27349	malonyl CoA:ACP acyltransferase (mitochondrial)	MCAT
MT001197	56922	methylcrotonoyl-CoA carboxylase 1 (α)	MCCC1
MT001254	64087	methylcrotonoyl-CoA carboxylase 2 (β)	MCCC2
MT001666	401250	mitochondrial coiled-coil domain 1	MCCD1
MT001418	84693	methylmalonyl CoA epimerase	MCEE
MT000347	4170	myeloid cell leukemia 1	MCL1
MT001453	90550	mitochondrial calcium uniporter	MCU
MT001249	63933	mitochondrial calcium uniporter regulator 1	MCUR1
MT000349	4190	malate dehydrogenase 1, NAD (soluble)	MDH1
MT000350	4191	malate dehydrogenase 2, NAD (mitochondrial)	MDH2
MT000351	4199	malic enzyme 1, NADP(+)-dependent, cytosolic	ME1
MT000352	4200	malic enzyme 2, NAD(+)-dependent, mitochondrial	ME2
MT000811	10873	malic enzyme 3, NADP(+)-dependent, mitochondrial	ME3
MT000353	4204	methyl CpG binding protein 2	MECP2
MT001029	51102	mitochondrial trans-2-enoyl-CoA reductase	MECR
MT000708	9443	mediator complex subunit 7	MED7
MT000354	4205	myocyte enhancer factor 2A	MEF2A
MT000355	4208	myocyte enhancer factor 2C	MEF2C
MT001608	254042	methionyl aminopeptidase type 1D (mitochondrial)	METAP1D
MT001690	751071	methyltransferase like 12	METTL12
MT001262	64745	methyltransferase like 17	METTL17
MT001607	254013	methyltransferase like 20	METTL20
MT001200	56947	mitochondrial fission factor	MFF
MT001168	55669	mitofusin 1	MFN1
MT000737	9927	mitofusin 2	MFN2
MT001422	84709	mitochondria-localized glutamic acid-rich protein	MGARP
MT000804	10724	meningioma expressed antigen 5 (hyaluronidase)	MGEA5
MT001472	92667	mitochondrial genome maintenance exonuclease 1	MGME1
MT000357	4257	microsomal glutathione S-transferase 1	MGST1
MT000773	10367	mitochondrial calcium uptake 1	MICU1
MT001600	221154	mitochondrial calcium uptake 2	MICU2
MT001633	286097	mitochondrial calcium uptake family, member 3	MICU3
MT001084	54471	mitochondrial elongation factor 1	MIEF1
MT001517	125170	mitochondrial elongation factor 2	MIEF2
MT001672	440574	mitochondrial inner membrane organizing system 1	MINOS1
MT001702	100532736	MINOS1-NBL1 readthrough	MINOS1-NBL1
MT000358	4285	mitochondrial intermediate peptidase	MIPEP
MT000822	10962	myeloid/lymphoid or mixed-lineage leukemia (trithorax	MLLT11
MT000859	22877	MLX interacting protein	MLXIP
MT000885	23417	malonyl-CoA decarboxylase	MLYCD
MT001575	166785	methylmalonic aciduria (cobalamin deficiency) cblA type	MMAA
MT001634	326625	methylmalonic aciduria (cobalamin deficiency) cblB type	MMAB
MT000927	25974	methylmalonic aciduria (cobalamin deficiency) cblC type,	MMACHC
MT000968	27249	methylmalonic aciduria (cobalamin deficiency) cblD type,	MMADHC
MT000360	4313	matrix metallopeptidase 2 (gelatinase A, 72kDa gelatinase,	MMP2
MT001255	64112	modulator of apoptosis 1	MOAP1
MT000362	4336	myelin-associated oligodendrocyte basic protein	MOBP
MT001068	51660	mitochondrial pyruvate carrier 1	MPC1
MT001643	347411	mitochondrial pyruvate carrier 1-like	MPC1L
MT000917	25874	mitochondrial pyruvate carrier 2	MPC2
MT000717	9526	mannose-P-dolichol utilization defect 1	MPDU1
MT000363	4350	N-methylpurine-DNA glycosylase	MPG
MT000364	4353	myeloperoxidase	MPO
MT001556	143098	membrane protein, palmitoylated 7 (MAGUK p55 subfamily	MPP7
MT000365	4357	mercaptopyruvate sulfurtransferase	MPST
MT000366	4358	MpV17 mitochondrial inner membrane protein	MPV17
MT001610	255027	MPV17 mitochondrial membrane protein-like	MPV17L
MT001425	84769	MPV17 mitochondrial membrane protein-like 2	MPV17L2
MT001334	79922	mitochondrial rRNA methyltransferase 1 homolog (S.	MRM1
MT001288	65008	mitochondrial ribosomal protein L1	MRPL1
MT001515	124995	mitochondrial ribosomal protein L10	MRPL10
MT001286	65003	mitochondrial ribosomal protein L11	MRPL11
MT000541	6182	mitochondrial ribosomal protein L12	MRPL12
MT000983	28998	mitochondrial ribosomal protein L13	MRPL13
MT001272	64928	mitochondrial ribosomal protein L14	MRPL14
MT000987	29088	mitochondrial ribosomal protein L15	MRPL15
MT001106	54948	mitochondrial ribosomal protein L16	MRPL16
MT001244	63875	mitochondrial ribosomal protein L17	MRPL17
MT000984	29074	mitochondrial ribosomal protein L18	MRPL18
MT000733	9801	mitochondrial ribosomal protein L19	MRPL19
MT001022	51069	mitochondrial ribosomal protein L2	MRPL2
MT001126	55052	mitochondrial ribosomal protein L20	MRPL20
MT001596	219927	mitochondrial ribosomal protein L21	MRPL21
MT000989	29093	mitochondrial ribosomal protein L22	MRPL22
MT000539	6150	mitochondrial ribosomal protein L23	MRPL23
MT001312	79590	mitochondrial ribosomal protein L24	MRPL24
MT001047	51264	mitochondrial ribosomal protein L27	MRPL27
MT000794	10573	mitochondrial ribosomal protein L28	MRPL28
MT000847	11222	mitochondrial ribosomal protein L3	MRPL3
MT001046	51263	mitochondrial ribosomal protein L30	MRPL30
MT001285	64983	mitochondrial ribosomal protein L32	MRPL32
MT000721	9553	mitochondrial ribosomal protein L33	MRPL33
MT001284	64981	mitochondrial ribosomal protein L34	MRPL34
MT001053	51318	mitochondrial ribosomal protein L35	MRPL35
MT001283	64979	mitochondrial ribosomal protein L36	MRPL36
MT001044	51253	mitochondrial ribosomal protein L37	MRPL37
MT001282	64978	mitochondrial ribosomal protein L38	MRPL38
MT001080	54148	mitochondrial ribosomal protein L39	MRPL39
MT001023	51073	mitochondrial ribosomal protein L4	MRPL4
MT001281	64976	mitochondrial ribosomal protein L40	MRPL40
MT001280	64975	mitochondrial ribosomal protein L41	MRPL41
MT000980	28977	mitochondrial ribosomal protein L42	MRPL42
MT001412	84545	mitochondrial ribosomal protein L43	MRPL43
MT001291	65080	mitochondrial ribosomal protein L44	MRPL44
MT001406	84311	mitochondrial ribosomal protein L45	MRPL45
MT000953	26589	mitochondrial ribosomal protein L46	MRPL46
MT001212	57129	mitochondrial ribosomal protein L47	MRPL47
MT001064	51642	mitochondrial ribosomal protein L48	MRPL48
MT000096	740	mitochondrial ribosomal protein L49	MRPL49
MT001087	54534	mitochondrial ribosomal protein L50	MRPL50
MT001045	51258	mitochondrial ribosomal protein L51	MRPL51
MT001509	122704	mitochondrial ribosomal protein L52	MRPL52
MT001499	116540	mitochondrial ribosomal protein L53	MRPL53
MT001500	116541	mitochondrial ribosomal protein L54	MRPL54
MT001525	128308	mitochondrial ribosomal protein L55	MRPL55
MT001300	78988	mitochondrial ribosomal protein L57	MRPL57
MT001287	65005	mitochondrial ribosomal protein L9	MRPL9
MT001140	55173	mitochondrial ribosomal protein S10	MRPS10
MT001276	64963	mitochondrial ribosomal protein S11	MRPS11
MT000542	6183	mitochondrial ribosomal protein S12	MRPS12
MT001248	63931	mitochondrial ribosomal protein S14	MRPS14
MT001275	64960	mitochondrial ribosomal protein S15	MRPS15
MT001013	51021	mitochondrial ribosomal protein S16	MRPS16
MT001054	51373	mitochondrial ribosomal protein S17	MRPS17
MT001139	55168	mitochondrial ribosomal protein S18A	MRPS18A
MT000978	28973	mitochondrial ribosomal protein S18B	MRPS18B
MT001015	51023	mitochondrial ribosomal protein S18C	MRPS18C
MT001034	51116	mitochondrial ribosomal protein S2	MRPS2
MT001083	54460	mitochondrial ribosomal protein S21	MRPS21
MT001199	56945	mitochondrial ribosomal protein S22	MRPS22
MT001065	51649	mitochondrial ribosomal protein S23	MRPS23
MT001274	64951	mitochondrial ribosomal protein S24	MRPS24
MT001261	64432	mitochondrial ribosomal protein S25	MRPS25
MT001273	64949	mitochondrial ribosomal protein S26	MRPS26
MT000867	23107	mitochondrial ribosomal protein S27	MRPS27
MT000975	28957	mitochondrial ribosomal protein S28	MRPS28
MT000812	10884	mitochondrial ribosomal protein S30	MRPS30
MT000761	10240	mitochondrial ribosomal protein S31	MRPS31
MT001066	51650	mitochondrial ribosomal protein S33	MRPS33
MT001297	65993	mitochondrial ribosomal protein S34	MRPS34
MT001237	60488	mitochondrial ribosomal protein S35	MRPS35
MT001468	92259	mitochondrial ribosomal protein S36	MRPS36
MT001279	64969	mitochondrial ribosomal protein S5	MRPS5
MT001278	64968	mitochondrial ribosomal protein S6	MRPS6
MT001025	51081	mitochondrial ribosomal protein S7	MRPS7
MT001277	64965	mitochondrial ribosomal protein S9	MRPS9
MT001470	92399	mitochondrial ribosome recycling factor	MRRF
MT001218	57380	MRS2 magnesium transporter	MRS2
MT000367	4482	methionine sulfoxide reductase A	MSRA
MT000862	22921	methionine sulfoxide reductase B2	MSRB2
MT001606	253827	methionine sulfoxide reductase B3	MSRB3
MT001136	55154	misato 1, mitochondrial distribution and morphology	MSTO1
MT000909	23787	mitochondrial carrier 1	MTCH1
MT000910	23788	mitochondrial carrier 2	MTCH2
MT000373	4515	mature T-cell proliferation 1	MTCP1
MT000643	7978	mitochondrial transcription termination factor 1	MTERF1
MT001351	80298	mitochondrial transcription termination factor 2	MTERF2
MT001008	51001	mitochondrial transcription termination factor 3	MTERF3
MT001530	130916	mitochondrial transcription termination factor 4	MTERF4
MT001512	123263	mitochondrial methionyl-tRNA formyltransferase	MTFMT
MT001059	51537	mitochondrial fission process 1	MTFP1
MT000727	9650	mitochondrial fission regulator 1	MTFR1
MT001483	113115	mitochondrial fission regulator 2	MTFR2
MT001467	92170	mitochondrial ribosome-associated GTPase 1	MTG1
MT000940	26164	mitochondrial ribosome-associated GTPase 2	MTG2
MT000376	4522	methylenetetrahydrofolate dehydrogenase (NADP+ dependent)	MTHFD1
MT000920	25902	methylenetetrahydrofolate dehydrogenase (NADP+ dependent)	MTHFD1L
MT000807	10797	methylenetetrahydrofolate dehydrogenase (NADP+ dependent)	MTHFD2
		2, methenyltetrahydrofolate cyclohydrolase
MT001675	441024	methylenetetrahydrofolate dehydrogenase (NADP+ dependent)	MTHFD2L
MT000377	4528	mitochondrial translational initiation factor 2	MTIF2
MT001595	219402	mitochondrial translational initiation factor 3	MTIF3
MT000378	4534	myotubularin 1	MTM1
MT000914	25821	mitochondrial tRNA translation optimization 1	MTO1
MT000233	2475	mechanistic target of rapamycin (serine/threonine kinase)	MTOR
MT001135	55149	mitochondrial poly(A) polymerase	MTPAP
MT000724	9617	mitochondrial translational release factor 1	MTRF1
MT001086	54516	mitochondrial translational release factor 1-like	MTRF1L
MT001224	57509	microtubule associated tumor suppressor 1	MTUS1
MT000387	4580	metaxin 1	MTX1
MT000800	10651	metaxin 2	MTX2
MT001642	345778	metaxin 3	MTX3
MT001313	79594	mitochondrial E3 ubiquitin protein ligase 1	MUL1
MT000388	4594	methylmalonyl CoA mutase	MUT
MT000389	4595	mutY homolog	MUTYH
MT000946	26292	MYC binding protein	MYCBP
MT000390	4628	myosin, heavy chain 10, non-muscle	MYH10
MT001327	79784	myosin, heavy chain 14, non-muscle	MYH14
MT001475	93408	myosin, light chain 10, regulatory	MYL10
MT001344	80179	myosin XIX	MYO19
MT000391	4641	myosin IC	MYO1C
MT000392	4653	myocilin, trabecular meshwork inducible glucocorticoid	MYOC
MT000700	9172	myomesin 2	MYOM2
MT001540	133686	NAD kinase 2, mitochondrial	NADK2
MT001573	162417	N-acetylglutamate synthase	NAGS
MT001593	203245	nuclear apoptosis inducing factor 1	NAIF1
MT000678	8774	N-ethylmaleimide-sensitive factor attachment protein, γ	NAPG
MT000393	4677	asparaginyl-tRNA synthetase	NARS
MT001321	79731	asparaginyl-tRNA synthetase 2, mitochondrial (putative)	NARS2
MT001637	339983	N-acetyltransferase 8-like (GCN5-related, putative)	NAT8L
MT000394	4686	nuclear cap binding protein subunit 1, 80kDa	NCBP1
MT000379	4535	NADH dehydrogenase, subunit 1 (complex I)	ND1
MT000380	4536	MTND2	ND2
MT000381	4537	NADH dehydrogenase, subunit 3 (complex I)	ND3
MT000382	4538	NADH dehydrogenase, subunit 4 (complex I)	ND4
MT000383	4539	NADH dehydrogenase, subunit 4L (complex I)	ND4L
MT000384	4540	NADH dehydrogenase, subunit 5 (complex I)	ND5
MT000385	4541	NADH dehydrogenase, subunit 6 (complex I)	ND6
MT001092	54602	Nedd4 family interacting protein 2	NDFIP2
MT000395	4694	NADH dehydrogenase (ubiquinone) 1 α subcomplex, 1, 7.5kDa	NDUFA1
MT000404	4705	NADH dehydrogenase (ubiquinone) 1 α subcomplex, 10, 42kDa	NDUFA10
MT001523	126328	NADH dehydrogenase (ubiquinone) 1 α subcomplex, 11, 14.7kDa	NDUFA11
MT001186	55967	NADH dehydrogenase (ubiquinone) 1 α subcomplex, 12	NDUFA12
MT001024	51079	NADH dehydrogenase (ubiquinone) 1 α subcomplex, 13	NDUFA13
MT000396	4695	NADH dehydrogenase (ubiquinone) 1 α subcomplex, 2, 8kDa	NDUFA2
MT000397	4696	NADH dehydrogenase (ubiquinone) 1 α subcomplex, 3, 9kDa	NDUFA3
MT000398	4697	NDUFA4, mitochondrial complex associated	NDUFA4
MT000399	4698	NADH dehydrogenase (ubiquinone) 1 α subcomplex, 5	NDUFA5
MT000400	4700	NADH dehydrogenase (ubiquinone) 1 α subcomplex, 6, 14kDa	NDUFA6
MT000401	4701	NADH dehydrogenase (ubiquinone) 1 α subcomplex, 7, 14.5kDa	NDUFA7
MT000402	4702	NADH dehydrogenase (ubiquinone) 1 α subcomplex, 8, 19kDa	NDUFA8
MT000403	4704	NADH dehydrogenase (ubiquinone) 1 α subcomplex, 9, 39kDa	NDUFA9
MT000405	4706	NADH dehydrogenase (ubiquinone) 1, α/β subcomplex, 1, 8kDa	NDUFAB1
MT001030	51103	NADH dehydrogenase (ubiquinone) complex I, assembly factor	NDUFAF1
MT001464	91942	NADH dehydrogenase (ubiquinone) complex I, assembly factor	NDUFAF2
MT000921	25915	NADH dehydrogenase (ubiquinone) complex I, assembly factor	NDUFAF3
MT000985	29078	NADH dehydrogenase (ubiquinone) complex I, assembly factor	NDUFAF4
MT001306	79133	NADH dehydrogenase (ubiquinone) complex I, assembly factor	NDUFAF5
MT001544	137682	NADH dehydrogenase (ubiquinone) complex I, assembly factor	NDUFAF6
MT001161	55471	NADH dehydrogenase (ubiquinone) complex I, assembly factor	NDUFAF7
MT000406	4707	NADH dehydrogenase (ubiquinone) 1 β subcomplex, 1, 7kDa	NDUFB1
MT000415	4716	NADH dehydrogenase (ubiquinone) 1 β subcomplex, 10, 22kDa	NDUFB10
MT001088	54539	NADH dehydrogenase (ubiquinone) 1 β subcomplex, 11, 17.3kDa	NDUFB11
MT000407	4708	NADH dehydrogenase (ubiquinone) 1 β subcomplex, 2, 8kDa	NDUFB2
MT000408	4709	NADH dehydrogenase (ubiquinone) 1 β subcomplex, 3, 12kDa	NDUFB3
MT000409	4710	NADH dehydrogenase (ubiquinone) 1 β subcomplex, 4, 15kDa	NDUFB4
MT000410	4711	NADH dehydrogenase (ubiquinone) 1 β subcomplex, 5, 16kDa	NDUFB5
MT000411	4712	NADH dehydrogenase (ubiquinone) 1 β subcomplex, 6, 17kDa	NDUFB6
MT000412	4713	NADH dehydrogenase (ubiquinone) 1 β subcomplex, 7, 18kDa	NDUFB7
MT000413	4714	NADH dehydrogenase (ubiquinone) 1 β subcomplex, 8, 19kDa	NDUFB8
MT000414	4715	NADH dehydrogenase (ubiquinone) 1 β subcomplex, 9, 22kDa	NDUFB9
MT000416	4717	NADH dehydrogenase (ubiquinone) 1, subcomplex unknown, 1,	NDUFC1
MT000417	4718	NADH dehydrogenase (ubiquinone) 1, subcomplex unknown, 2,	NDUFC2
MT001701	100532726	NDUFC2-KCTD14 readthrough	NDUFC2-KCTD14
MT000418	4719	NADH dehydrogenase (ubiquinone) Fe-S protein 1, 75kDa	NDUFS1
MT000419	4720	NADH dehydrogenase (ubiquinone) Fe-S protein 2, 49kDa	NDUFS2
MT000420	4722	NADH dehydrogenase (ubiquinone) Fe-S protein 3, 30kDa	NDUFS3
MT000422	4724	NADH dehydrogenase (ubiquinone) Fe-S protein 4, 18kDa	NDUFS4
MT000423	4725	NADH dehydrogenase (ubiquinone) Fe-S protein 5, 15kDa	NDUFS5
MT000424	4726	NADH dehydrogenase (ubiquinone) Fe-S protein 6, 13kDa	NDUFS6
MT001648	374291	NADH dehydrogenase (ubiquinone) Fe-S protein 7, 20kDa	NDUFS7
MT000425	4728	NADH dehydrogenase (ubiquinone) Fe-S protein 8, 23kDa	NDUFS8
MT000421	4723	NADH dehydrogenase (ubiquinone) flavoprotein 1, 51kDa	NDUFV1
MT000426	4729	NADH dehydrogenase (ubiquinone) flavoprotein 2, 24kDa	NDUFV2
MT000427	4731	NADH dehydrogenase (ubiquinone) flavoprotein 3, 10kDa	NDUFV3
MT000429	4744	neurofilament, heavy polypeptide	NEFH
MT000430	4747	neurofilament, light polypeptide	NEFL
MT000642	7936	negative elongation factor complex member E	NELFE
MT001529	129807	sialidase 4	NEU4
MT000431	4790	nuclear factor of kappa light polypeptide gene enhancer in	NFKB1
MT000694	9054	NFS1 cysteine desulfurase	NFS1
MT000967	27247	NFU1 iron-sulfur cluster scaffold	NFU1
MT001232	58157	neuroglobin	NGB
MT001238	60491	NIF3 NGG1 interacting factor 3-like 1 (S. cerevisiae)	NIF3L1
MT000660	8508	nipsnap homolog 1 (C. elegans)	NIPSNAP1
MT000432	4817	nitrilase 1	NIT1
MT001202	56954	nitrilase family, member 2	NIT2
MT001221	57486	neurolysin (metallopeptidase M3 family)	NLN
MT001522	126206	NLR family, pyrin domain containing 5	NLRP5
MT001315	79671	NLR family member X1	NLRX1
MT001685	654364	NME1-NME2 readthrough	NME1-NME2
MT000433	4832	NME/NM23 nucleoside diphosphate kinase 3	NME3
MT000434	4833	NME/NM23 nucleoside diphosphate kinase 4	NME4
MT000758	10201	NME/NM23 nucleoside diphosphate kinase 6	NME6
MT001646	349565	nicotinamide nucleotide adenylyltransferase 3	NMNAT3
MT000435	4836	N-myristoyltransferase 1	NMT1
MT000894	23530	nicotinamide nucleotide transhydrogenase	NNT
MT001400	84273	nitric oxide associated 1	NOA1
MT000690	8996	nucleolar protein 3 (apoptosis repressor with CARD domain)	NOL3
MT001292	65083	nucleolar protein 6 (RNA-associated)	NOL6
MT001055	51406	nucleolar protein 7, 27kDa	NOL7
MT000665	8602	NOP14 nucleolar protein	NOP14
MT000436	4842	nitric oxide synthase 1 (neuronal)	NOS1
MT000437	4846	nitric oxide synthase 3 (endothelial cell)	NOS3
MT001004	50507	NADPH oxidase 4	NOX4
MT000438	4884	neuronal pentraxin I	NPTX1
MT000267	2908	nuclear receptor subfamily 3, group C, member 1	NR3C1
MT000439	4898	nardilysin (N-arginine dibasic convertase)	NRD1
MT000440	4899	nuclear respiratory factor 1	NRF1
MT001652	387338	NOP2/Sun domain family, member 4	NSUN4
MT001000	30833	5', 3'-nucleotidase, cytosolic	NT5C
MT001043	51251	5'-nucleotidase, cytosolic IIIA	NT5C3A
MT001060	51559	5'-nucleotidase domain containing 3	NT5DC3
MT001201	56953	5',3'-nucleotidase, mitochondrial	NT5M
MT000441	4913	nth endonuclease III-like 1 (E. coli)	NTHL1
MT001349	80224	nucleotide binding protein-like	NUBPL
MT000375	4521	nudix (nucleoside diphosphate linked moiety X)-type motif 1	NUDT1
MT000925	25961	nudix (nucleoside diphosphate linked moiety X)-type motif	NUDT13
MT001659	390916	nudix (nucleoside diphosphate linked moiety X)-type motif	NUDT19
MT000038	318	nudix (nucleoside diphosphate linked moiety X)-type motif 2	NUDT2
MT000842	11162	nudix (nucleoside diphosphate linked moiety X)-type motif 6	NUDT6
MT001609	254552	nudix (nucleoside diphosphate linked moiety X)-type motif 8	NUDT8
MT001076	53343	nudix (nucleoside diphosphate linked moiety X)-type motif 9	NUDT9
MT000442	4931	nuclear VCP-like	NVL
MT001495	115861	nucleoredoxin-like 1	NXNL1
MT000443	4938	2'-5'-oligoadenylate synthetase 1, 40/46kDa	OAS1
MT000444	4939	2'-5'-oligoadenylate synthetase 2, 69/71kDa	OAS2
MT000445	4942	ornithine aminotransferase	OAT
MT001105	54940	OCIA domain containing 1	OCIAD1
MT001536	132299	OCIA domain containing 2	OCIAD2
MT000446	4967	oxoglutarate (α-ketoglutarate) dehydrogenase (lipoamide)	OGDH
MT001176	55753	oxoglutarate dehydrogenase-like	OGDHL
MT000447	4968	8-oxoguanine DNA glycosylase	OGG1
MT000658	8473	O-linked N-acetylglucosamine (GlcNAc) transferase	OGT
MT000792	10562	olfactomedin 4	OLFM4
MT001491	115209	OMA1 zinc metallopeptidase	OMA1
MT000448	4976	optic atrophy 1 (autosomal dominant)	OPA1
MT001345	80207	optic atrophy 3 (autosomal recessive, with chorea and	OPA3
MT000449	4985	opioid receptor, δ 1	OPRD1
MT001257	64172	O-sialoglycoprotein endopeptidase-like 1	OSGEPL1
MT000450	5009	ornithine carbamoyltransferase	OTC
MT000451	5018	oxidase (cytochrome c) assembly 1-like	OXA1L
MT000452	5019	3-oxoacid CoA transferase 1	OXCT1
MT001251	64064	3-oxoacid CoA transferase 2	OXCT2
MT001635	339229	oxidoreductase-like domain containing 1	OXLD1
MT001466	92106	oxidoreductase NAD-binding domain containing 1	OXNAD1
MT001129	55074	oxidation resistance 1	OXR1
MT001115	54995	3-oxoacyl-ACP synthase, mitochondrial	OXSM
MT000453	5028	purinergic receptor P2Y, G-protein coupled, 1	P2RY1
MT001269	64805	purinergic receptor P2Y, G-protein coupled, 12	P2RY12
MT000454	5033	prolyl 4-hydroxylase, α polypeptide I	P4HA1
MT001554	140886	poly(A) binding protein, cytoplasmic 5	PABPC5
MT001543	135138	PARK2 co-regulated	PACRG
MT000875	23241	phosphofurin acidic cluster sorting protein 2	PACS2
MT001214	57144	p21 protein (Cdc42/Rac)-activated kinase 7	PAK7
MT000863	23022	palladin, cytoskeletal associated protein	PALLD
MT001017	51025	presequence translocase-associated motor 16 homolog (S.	PAM16
MT001340	80025	pantothenate kinase 2	PANK2
MT000659	8505	poly (ADP-ribose) glycohydrolase	PARG
MT000456	5071	parkin RBR E3 ubiquitin protein ligase	PARK2
MT000850	11315	parkinson protein 7	PARK7
MT001162	55486	presenilin associated, rhomboid-like	PARL
MT000926	25973	prolyl-tRNA synthetase 2, mitochondrial (putative)	PARS2
MT000457	5091	pyruvate carboxylase	PC
MT001389	84105	pterin-4 α-carbinolamine dehydratase/dimerization cofactor	PCBD2
		of hepatocyte nuclear factor 1 α (TCF1) 2
MT000458	5095	propionyl CoA carboxylase, α polypeptide	PCCA
MT000459	5096	propionyl CoA carboxylase, β polypeptide	PCCB
MT000460	5106	phosphoenolpyruvate carboxykinase 2 (mitochondrial)	PCK2
MT001590	201626	phosphodiesterase 12	PDE12
MT000461	5138	phosphodiesterase 2A, cGMP-stimulated	PDE2A
MT001256	64146	peptide deformylase (mitochondrial)	PDF
MT000462	5160	pyruvate dehydrogenase (lipoamide) α 1	PDHA1
MT000463	5161	pyruvate dehydrogenase (lipoamide) α 2	PDHA2
MT000464	5162	pyruvate dehydrogenase (lipoamide) β	PDHB
MT000647	8050	pyruvate dehydrogenase complex, component X	PDHX
MT000465	5163	pyruvate dehydrogenase kinase, isozyme 1	PDK1
MT000466	5164	pyruvate dehydrogenase kinase, isozyme 2	PDK2
MT000467	5165	pyruvate dehydrogenase kinase, isozyme 3	PDK3
MT000468	5166	pyruvate dehydrogenase kinase, isozyme 4	PDK4
MT001095	54704	pyruvate dehyrogenase phosphatase catalytic subunit 1	PDP1
MT001225	57546	pyruvate dehyrogenase phosphatase catalytic subunit 2	PDP2
MT001128	55066	pyruvate dehydrogenase phosphatase regulatory subunit	PDPR
MT000898	23590	prenyl (decaprenyl) diphosphate synthase, subunit 1	PDSS1
MT001210	57107	prenyl (decaprenyl) diphosphate synthase, subunit 2	PDSS2
MT001180	55825	peroxisomal trans-2-enoyl-CoA reductase	PECR
MT000775	10400	phosphatidylethanolamine N-methyltransferase	PEMT
MT001252	64065	PERP, TP53 apoptosis effector	PERP
MT001692	100131801	PET100 homolog (S. cerevisiae)	PET100
MT001699	100303755	PET117 homolog (S. cerevisiae)	PET117
MT000679	8799	peroxisomal biogenesis factor 11 β	PEX11B
MT000524	5830	peroxisomal biogenesis factor 5	PEX5
MT000470	5202	prefoldin subunit 2	PFDN2
MT000471	5203	prefoldin subunit 4	PFDN4
MT001581	192111	phosphoglycerate mutase family member 5	PGAM5
MT000472	5241	progesterone receptor	PGR
MT000714	9489	phosphatidylglycerophosphate synthase 1	PGS1
MT000473	5245	prohibitin	PHB
MT000851	11331	prohibitin 2	PHB2
MT000475	5264	phytanoyl-CoA 2-hydroxylase	PHYH
MT001410	84457	phytanoyl-CoA 2-hydroxylase interacting protein-like	PHYHIPL
MT001440	85007	5-phosphohydroxy-L-lysine phospho-lyase	PHYKPL
MT001159	55361	phosphatidylinositol 4-kinase type 2 α	PI4K2A
MT000476	5298	phosphatidylinositol 4-kinase, catalytic, β	PI4KB
MT000709	9463	protein interacting with PRKCA 1	PICK1
MT001124	55022	phosphotyrosine interaction domain containing 1	PID1
MT001341	80119	PIF1 5'-to-3' DNA helicase	PIF1
MT000835	11040	Pim-2 proto-oncogene, serine/threonine kinase	PIM2
MT000477	5303	protein (peptidylprolyl cis/trans isomerase) NIMA-	PIN4
		interacting, 4 (parvulin)
MT001289	65018	PTEN induced putative kinase 1	PINK1
MT001113	54984	PIN2/TERF1 interacting, telomerase inhibitor 1	PINX1
MT000905	23761	phosphatidylserine decarboxylase	PISD
MT000787	10531	pitrilysin metallopeptidase 1	PITRM1
MT000478	5315	pyruvate kinase, muscle	PKM
MT000903	23659	phospholipase A2, group XV	PLA2G15
MT000479	5320	phospholipase A2, group IIA (platelets, synovial fluid)	PLA2G2A
MT000480	5321	phospholipase A2, group IVA (cytosolic, calcium-dependent)	PLA2G4A
MT001694	100137049	phospholipase A2, group IVB (cytosolic)	PLA2G4B
MT000653	8398	phospholipase A2, group VI (cytosolic, calcium-independent)	PLA2G6
MT001589	201164	phospholipase D family, member 6	PLD6
MT001182	55848	plasminogen receptor, C-terminal lysine transmembrane	PLGRKT
MT001671	440503	perilipin 5	PLIN5
MT000481	5350	phospholamban	PLN
MT001209	57048	phospholipid scramblase 3	PLSCR3
MT000482	5366	phorbol-12-myristate-13-acetate-induced protein 1	PMAIP1
MT000873	23203	peptidase (mitochondrial processing) α	PMPCA
MT000715	9512	peptidase (mitochondrial processing) β	PMPCB
MT000923	25953	paroxysmal nonkinesigenic dyskinesia	PNKD
MT001650	375775	patatin-like phospholipase domain containing 7	PNPLA7
MT001445	87178	polyribonucleotide nucleotidyltransferase 1	PNPT1
MT000803	10714	polymerase (DNA-directed), δ 3, accessory subunit	POLD3
MT000936	26073	polymerase (DNA-directed), δ interacting protein 2	POLDIP2
MT000484	5428	polymerase (DNA directed), γ	POLG
MT000848	11232	polymerase (DNA directed), γ 2, accessory subunit	POLG2
MT000485	5442	polymerase (RNA) mitochondrial (DNA directed)	POLRMT
MT000486	5445	paraoxonase 2	PON2
MT000764	10248	processing of precursor 7, ribonuclease P/MRP subunit (S.	POP7
		cerevisiae)
MT000487	5447	P450 (cytochrome) oxidoreductase	POR
MT000956	27068	pyrophosphatase (inorganic) 2	PPA2
MT000813	10891	peroxisome proliferator-activated receptor γ, coactivator	PPARGC1A
		1 α
MT001539	133522	peroxisome proliferator-activated receptor γ, coactivator	PPARGC1B
		1 β
MT000751	10105	peptidylprolyl isomerase F	PPIF
MT000489	5493	periplakin	PPL
MT000857	22843	protein phosphatase, Mg2+/Mn2+ dependent, 1E	PPM1E
MT001564	152926	protein phosphatase, Mg2+/Mn2+ dependent, 1K	PPM1K
MT000490	5498	protoporphyrinogen oxidase	PPOX
MT000491	5501	protein phosphatase 1, catalytic subunit, γ isozyme	PPP1CC
MT000902	23645	protein phosphatase 1, regulatory subunit 15A	PPP1R15A
MT000492	5515	protein phosphatase 2, catalytic subunit, α isozyme	PPP2CA
MT000493	5516	protein phosphatase 2, catalytic subunit, β isozyme	PPP2CB
MT000494	5518	protein phosphatase 2, regulatory subunit A, α	PPP2R1A
MT000495	5521	protein phosphatase 2, regulatory subunit B, β	PPP2R2B
MT001120	55012	protein phosphatase 2, regulatory subunit B'', γ	PPP2R3C
MT000496	5530	protein phosphatase 3, catalytic subunit, α isozyme	PPP3CA
MT000497	5533	protein phosphatase 3, catalytic subunit, γ isozyme	PPP3CC
MT000498	5534	protein phosphatase 3, regulatory subunit B, α	PPP3R1
MT001572	160760	PTC7 protein phosphatase homolog (S. cerevisiae)	PPTC7
MT000455	5052	peroxiredoxin 1	PRDX1
MT000818	10935	peroxiredoxin 3	PRDX3
MT000789	10549	peroxiredoxin 4	PRDX4
MT000915	25824	peroxiredoxin 5	PRDX5
MT000964	27166	PRELI domain containing 1	PRELID1
MT001566	153768	PRELI domain containing 2	PRELID2
MT001591	201973	primase and polymerase (DNA-directed)	PRIMPOL
MT000499	5566	protein kinase, cAMP-dependent, catalytic, α	PRKACA
MT000500	5578	protein kinase C, α	PRKCA
MT000501	5580	protein kinase C, δ	PRKCD
MT000502	5581	protein kinase C, ε	PRKCE
MT000510	5621	prion protein	PRNP
MT000511	5625	proline dehydrogenase (oxidase) 1	PRODH
MT001234	58510	proline dehydrogenase (oxidase) 2	PRODH2
MT000845	11212	proline synthetase co-transcribed homolog (bacterial)	PROSC
MT001333	79899	proline rich 5 like	PRR5L
MT001576	167681	protease, serine, 35	PRSS35
MT000513	5660	prosaposin	PSAP
MT000514	5663	presenilin 1	PSEN1
MT000515	5664	presenilin 2	PSEN2
MT000516	5691	proteasome (prosome, macropain) subunit, β type, 3	PSMB3
MT000517	5716	proteasome (prosome, macropain) 26S subunit, non-ATPase, 10	PSMD10
MT001504	118672	phosphoseryl-tRNA kinase	PSTK
MT000932	26024	pentatricopeptide repeat domain 1	PTCD1
MT001328	79810	pentatricopeptide repeat domain 2	PTCD2
MT001125	55037	pentatricopeptide repeat domain 3	PTCD3
MT000518	5728	phosphatase and tensin homolog	PTEN
MT001342	80142	prostaglandin E synthase 2	PTGES2
MT001488	114971	protein tyrosine phosphatase, mitochondrial 1	PTPMT1
MT000519	5781	protein tyrosine phosphatase, non-receptor type 11	PTPN11
MT001624	284119	polymerase I and transcript release factor	PTRF
MT001547	138428	peptidyl-tRNA hydrolase 1 homolog (S. cerevisiae)	PTRH1
MT001067	51651	peptidyl-tRNA hydrolase 2	PTRH2
MT000520	5805	6-pyruvoyltetrahydropterin synthase	PTS
MT000856	22827	poly-U binding splicing factor 60KDa	PUF60
MT001355	80324	pseudouridylate synthase 1	PUS1
MT000521	5819	poliovirus receptor-related 2 (herpesvirus entry mediator	PVRL2
MT000523	5827	peroxisomal membrane protein 2, 22kDa	PXMP2
MT000991	29108	PYD and CARD domain containing	PYCARD
MT000525	5831	pyrroline-5-carboxylate reductase 1	PYCR1
MT001704	100996939	PIGY upstream reading frame	PYURF
MT000527	5859	glutaminyl-tRNA synthetase	QARS
MT000528	5860	quinoid dihydropteridine reductase	QDPR
MT001150	55278	glutaminyl-tRNA synthase (glutamine-hydrolyzing)-like 1	QRSL1
MT001370	81890	queuine tRNA-ribosyltransferase 1	QTRT1
MT001317	79691	queuine tRNA-ribosyltransferase domain containing 1	QTRTD1
MT000677	8766	RAB11A, member RAS oncogene family	RAB11A
MT000701	9230	RAB11B, member RAS oncogene family	RAB11B
MT000934	26056	RAB11 family interacting protein 5 (class I)	RAB11FIP5
MT001368	81876	RAB1B, member RAS oncogene family	RAB1B
MT001078	53917	RAB24, member RAS oncogene family	RAB24
MT000688	8934	RAB29, member RAS oncogene family	RAB29
MT000826	10981	RAB32, member RAS oncogene family	RAB32
MT000832	11021	RAB35, member RAS oncogene family	RAB35
MT000529	5864	RAB3A, member RAS oncogene family	RAB3A
MT000719	9545	RAB3D, member RAS oncogene family	RAB3D
MT001615	282808	RAB40A, member RAS oncogene family-like	RAB40AL
MT001074	51762	RAB8B, member RAS oncogene family	RAB8B
MT000530	5888	RAD51 recombinase	RAD51
MT000531	5889	RAD51 paralog C	RAD51C
MT000532	5894	Raf-1 proto-oncogene, serine/threonine kinase	RAF1
MT000806	10743	retinoic acid induced 1	RAI1
MT000935	26064	retinoic acid induced 14	RAI14
MT000533	5910	RAP1, GTP-GDP dissociation stimulator 1	RAP1GDS1
MT000534	5917	arginyl-tRNA synthetase	RARS
MT001208	57038	arginyl-tRNA synthetase 2, mitochondrial	RARS2
MT001330	79863	ribosome binding factor A (putative)	RBFA
MT001480	112724	retinol dehydrogenase 13 (all-trans/9-cis)	RDH13
MT001228	57665	retinol dehydrogenase 14 (all-trans/9-cis/11-cis)	RDH14
MT001290	65055	receptor accessory protein 1	REEP1
MT000930	25996	RNA exonuclease 2	REXO2
MT001152	55312	riboflavin kinase	RFK
MT000535	5997	regulator of G-protein signaling 2	RGS2
MT001394	84236	rhomboid domain containing 1	RHBDD1
MT001151	55288	ras homolog family member T1	RHOT1
MT001448	89941	ras homolog family member T2	RHOT2
MT001376	83547	Rab interacting lysosomal protein	RILP
MT000673	8737	receptor (TNFRSF)-interacting serine-threonine kinase 1	RIPK1
MT000834	11035	receptor-interacting serine-threonine kinase 3	RIPK3
MT001033	51115	regulator of microtubule dynamics 1	RMDN1
MT001562	151393	regulator of microtubule dynamics 2	RMDN2
MT001141	55177	regulator of microtubule dynamics 3	RMDN3
MT001118	55005	required for meiotic nuclear division 1 homolog (S.	RMND1
MT001602	246243	ribonuclease H1	RNASEH1
MT000536	6041	ribonuclease L (2',5'-oligoisoadenylate synthetase-	RNASEL
MT001611	255488	ring finger protein 144B	RNF144B
MT001459	91445	ring finger protein 185	RNF185
MT000537	6048	ring finger protein 5, E3 ubiquitin protein ligase	RNF5
MT001142	55178	RNA methyltransferase like 1	RNMTL1
MT000386	4550		RNR2
MT001553	140823	reactive oxygen species modulator 1	ROMO1
MT000428	4736	ribosomal protein L10a	RPL10A
MT000540	6165	ribosomal protein L35a	RPL35A
MT000838	11102	ribonuclease P/MRP 14kDa subunit	RPP14
MT000545	6208	ribosomal protein S14	RPS14
MT000543	6188	ribosomal protein S3	RPS3
MT000970	27330	ribosomal protein S6 kinase, 90kDa, polypeptide 6	RPS6KA6
MT000544	6198	ribosomal protein S6 kinase, 70kDa, polypeptide 1	RPS6KB1
MT001429	84881	RNA pseudouridylate synthase domain containing 4	RPUSD4
MT001002	50484	ribonucleotide reductase M2 B (TP53 inducible)	RRM2B
MT001011	51018	ribosomal RNA processing 15 homolog (S. cerevisiae)	RRP15
MT001153	55316	radical S-adenosyl methionine domain containing 1	RSAD1
MT001460	91543	radical S-adenosyl methionine domain containing 2	RSAD2
MT001426	84816	reticulon 4 interacting protein 1	RTN4IP1
MT000111	862	runt-related transcription factor 1; translocated to, 1	RUNX1T1
MT000944	26278	sacsin molecular chaperone	SACS
MT000913	25813	SAMM50 sorting and assembly machinery component	SAMM50
MT000188	1757	sarcosine dehydrogenase	SARDH
MT000866	23098	sterile α and TIR motif containing 1	SARM1
MT000548	6301	seryl-tRNA synthetase	SARS
MT001104	54938	seryl-tRNA synthetase 2, mitochondrial	SARS2
MT001027	51097	saccharopine dehydrogenase (putative)	SCCPDH
MT000549	6341	SCO1 cytochrome c oxidase assembly protein	SCO1
MT000740	9997	SCO2 cytochrome c oxidase assembly protein	SCO2
MT000550	6342	sterol carrier protein 2	SCP2
MT000551	6389	succinate dehydrogenase complex, subunit A, flavoprotein	SDHA
MT001683	644096	succinate dehydrogenase complex assembly factor 1	SDHAF1
MT001107	54949	succinate dehydrogenase complex assembly factor 2	SDHAF2
MT000552	6390	succinate dehydrogenase complex, subunit B, iron sulfur	SDHB
MT000553	6391	succinate dehydrogenase complex, subunit C, integral	SDHC
MT000554	6392	succinate dehydrogenase complex, subunit D, integral	SDHD
MT000828	10993	serine dehydratase	SDS
MT001485	113675	serine dehydratase-like	SDSL
MT001302	79048	SECIS binding protein 2	SECISBP2
MT001437	84947	serine active site containing 1	SERAC1
MT001604	253190	serine hydrolase-like 2	SERHL2
MT001379	83667	sestrin 2	SESN2
MT000260	2810	stratifin	SFN
MT001478	94081	sideroflexin 1	SFXN1
MT001506	118980	sideroflexin 2	SFXN2
MT001366	81855	sideroflexin 3	SFXN3
MT001507	119559	sideroflexin 4	SFXN4
MT001479	94097	sideroflexin 5	SFXN5
MT000555	6446	serum/glucocorticoid regulated kinase 1	SGK1
MT000710	9467	SH3-domain binding protein 5 (BTK-associated)	SH3BP5
MT001028	51100	SH3-domain GRB2-like endophilin B1	SH3GLB1
MT001367	81858	SHANK-associated RH domain interactor	SHARPIN
MT000556	6464	SHC (Src homology 2 domain containing) transforming	SHC1
MT000557	6470	serine hydroxymethyltransferase 1 (soluble)	SHMT1
MT000558	6472	serine hydroxymethyltransferase 2 (mitochondrial)	SHMT2
MT000559	6474	short stature homeobox 2	SHOX2
MT001620	283514	siah E3 ubiquitin protein ligase family member 3	SIAH3
MT000884	23411	sirtuin 1	SIRT1
MT000883	23410	sirtuin 3	SIRT3
MT000882	23409	sirtuin 4	SIRT4
MT000881	23408	sirtuin 5	SIRT5
MT000793	10572	SIVA1, apoptosis-inducing factor	SIVA1
MT000563	6566	solute carrier family 16 (monocarboxylate transporter),	SLC16A1
MT000565	6583	solute carrier family 22 (organic cation/zwitterion	SLC22A4
MT000564	6576	solute carrier family 25 (mitochondrial carrier; citrate	SLC25A1
MT000156	1468	solute carrier family 25 (mitochondrial carrier;	SLC25A10
MT000654	8402	solute carrier family 25 (mitochondrial carrier;	SLC25A11
MT000666	8604	solute carrier family 25 (aspartate/glutamate carrier),	SLC25A12
MT000756	10165	solute carrier family 25 (aspartate/glutamate carrier),	SLC25A13
MT000692	9016	solute carrier family 25 (mitochondrial carrier, brain),	SLC25A14
MT000757	10166	solute carrier family 25 (mitochondrial carrier; ornithine	SLC25A15
MT000645	8034	solute carrier family 25 (mitochondrial carrier), member 16	SLC25A16
MT000784	10478	solute carrier family 25 (mitochondrial carrier;	SLC25A17
MT001381	83733	solute carrier family 25 (glutamate carrier), member 18	SLC25A18
MT001236	60386	solute carrier family 25 (mitochondrial thiamine	SLC25A19
MT001386	83884	solute carrier family 25 (mitochondrial carrier; ornithine	SLC25A2
MT000098	788	solute carrier family 25 (carnitine/acylcarnitine	SLC25A20
MT001446	89874	solute carrier family 25 (mitochondrial oxoadipate carrier)	SLC25A21
MT001324	79751	solute carrier family 25 (mitochondrial carrier: glutamate)	SLC25A22
MT001305	79085	solute carrier family 25 (mitochondrial carrier; phosphate	SLC25A23
MT000997	29957	solute carrier family 25 (mitochondrial carrier; phosphate	SLC25A24
MT001487	114789	solute carrier family 25 (mitochondrial carrier; phosphate	SLC25A25
MT001492	115286	solute carrier family 25 (S-adenosylmethionine carrier),	SLC25A26
MT000713	9481	solute carrier family 25, member 27	SLC25A27
MT001372	81894	solute carrier family 25 (mitochondrial iron transporter),	SLC25A28
MT001511	123096	solute carrier family 25 (mitochondrial	SLC25A29
MT000474	5250	solute carrier family 25 (mitochondrial carrier; phosphate	SLC25A3
MT001605	253512	solute carrier family 25, member 30	SLC25A30
MT001374	83447	solute carrier family 25 (mitochondrial carrier; adenine	SLC25A31
MT001361	81034	solute carrier family 25 (mitochondrial folate carrier),	SLC25A32
MT001402	84275	solute carrier family 25 (pyrimidine nucleotide carrier),	SLC25A33
MT001630	284723	solute carrier family 25, member 34	SLC25A34
MT001661	399512	solute carrier family 25, member 35	SLC25A35
MT001143	55186	solute carrier family 25 (pyrimidine nucleotide carrier),	SLC25A36
MT001052	51312	solute carrier family 25 (mitochondrial iron transporter),	SLC25A37
MT001111	54977	solute carrier family 25, member 38	SLC25A38
MT001063	51629	solute carrier family 25, member 39	SLC25A39
MT000034	291	solute carrier family 25 (mitochondrial carrier; adenine	SLC25A4
MT001187	55972	solute carrier family 25, member 40	SLC25A40
MT001627	284427	solute carrier family 25, member 41	SLC25A41
MT001628	284439	solute carrier family 25, member 42	SLC25A42
MT001594	203427	solute carrier family 25, member 43	SLC25A43
MT000728	9673	solute carrier family 25, member 44	SLC25A44
MT001617	283130	solute carrier family 25, member 45	SLC25A45
MT001458	91137	solute carrier family 25, member 46	SLC25A46
MT001621	283600	solute carrier family 25, member 47	SLC25A47
MT001565	153328	solute carrier family 25, member 48	SLC25A48
MT000035	292	solute carrier family 25 (mitochondrial carrier; adenine	SLC25A5
MT001465	92014	solute carrier family 25, member 51	SLC25A51
MT001558	147407	solute carrier family 25, member 52	SLC25A52
MT001668	401612	solute carrier family 25, member 53	SLC25A53
MT000036	293	solute carrier family 25 (mitochondrial carrier; adenine	SLC25A6
MT000830	11001	solute carrier family 27 (fatty acid transporter), member 2	SLC27A2
MT000829	11000	solute carrier family 27 (fatty acid transporter), member 3	SLC27A3
MT001169	55676	solute carrier family 30 (zinc transporter), member 6	SLC30A6
MT001007	51000	solute carrier family 35 (adenosine 3'-phospho 5'-	SLC35B3
MT001112	54978	solute carrier family 35, member F6	SLC35F6
MT000560	6519	solute carrier family 3 (amino acid transporter heavy	SLC3A1
MT000888	23446	solute carrier family 44 (choline transporter), member 1	SLC44A1
MT001231	57835	solute carrier family 4 (sodium bicarbonate cotransporter),	SLC4A5
MT000561	6547	solute carrier family 8 (sodium/calcium exchanger), member	SLC8A3
MT001339	80024	solute carrier family 8 (sodium/lithium/calcium exchanger),	SLC8B1
MT000562	6548	solute carrier family 9, subfamily A (NHE1, cation proton	SLC9A1
MT000785	10479	solute carrier family 9, subfamily A (NHE6, cation proton	SLC9A6
MT001538	133308	solute carrier family 9, subfamily B (NHA2, cation proton	SLC9B2
MT001371	81892	SRA stem-loop interacting RNA binding protein	SLIRP
MT000566	6586	slit homolog 3 (Drosophila)	SLIT3
MT000799	10650	slowmo homolog 1 (Drosophila)	SLMO1
MT001010	51012	slowmo homolog 2 (Drosophila)	SLMO2
MT000348	4184	sperm mitochondria-associated cysteine-rich protein	SMCP
MT001463	91689	single-pass membrane protein with aspartate-rich tail 1	SMDT1
MT001674	440957	small integral membrane protein 4	SMIM4
MT000568	6622	synuclein, α (non A4 component of amyloid precursor)	SNCA
MT000567	6620	synuclein, β	SNCB
MT000955	27044	staphylococcal nuclease and tudor domain containing 1	SND1
MT000651	8303	stannin	SNN
MT000732	9751	syntaphilin	SNPH
MT000569	6647	superoxide dismutase 1, soluble	SOD1
MT000570	6648	superoxide dismutase 2, mitochondrial	SOD2
MT000571	6652	sorbitol dehydrogenase	SORD
MT000573	6663	SRY (sex determining region Y)-box 10	SOX10
MT000572	6659	SRY (sex determining region Y)-box 4	SOX4
MT000574	6678	secreted protein, acidic, cysteine-rich (osteonectin)	SPARC
MT001537	132671	spermatogenesis associated 18	SPATA18
MT001597	219938	spermatogenesis associated 19	SPATA19
MT001574	166378	spermatogenesis associated 5	SPATA5
MT000868	23111	spastic paraplegia 20 (Troyer syndrome)	SPG20
MT000575	6687	spastic paraplegia 7 (pure and complicated autosomal	SPG7
MT001354	80309	SPHK1 interactor, AKAP domain containing	SPHKAP
MT001388	83985	spinster homolog 1 (Drosophila)	SPNS1
MT000576	6697	sepiapterin reductase (7,8-dihydrobiopterin:NADP+	SPR
MT001618	283377	SPRY domain containing 4	SPRYD4
MT000716	9517	serine palmitoyltransferase, long chain base subunit 2	SPTLC2
MT001233	58472	sulfide quinone reductase-like (yeast)	SQRDL
MT000577	6714	SRC proto-oncogene, non-receptor tyrosine kinase	SRC
MT000578	6717	sorcin	SRI
MT000579	6728	signal recognition particle 19kDa	SRP19
MT000580	6742	single-stranded DNA binding protein 1, mitochondrial	SSBP1
MT001662	400410	suppressor of tumorigenicity 20	ST20
MT000941	26228	signal transducing adaptor family member 1	STAP1
MT000581	6770	steroidogenic acute regulatory protein	STAR
MT001455	90627	StAR-related lipid transfer (START) domain containing 13	STARD13
MT000820	10948	StAR-related lipid transfer (START) domain containing 3	STARD3
MT001196	56910	StAR-related lipid transfer (START) domain containing 7	STARD7
MT000582	6774	signal transducer and activator of transcription 3 (acute-	STAT3
MT000583	6794	serine/threonine kinase 11	STK11
MT001001	30968	stomatin (EPB72)-like 2	STOML2
MT001122	55014	syntaxin 17	STX17
MT000584	6812	syntaxin binding protein 1	STXBP1
MT000682	8803	succinate-CoA ligase, ADP-forming, β subunit	SUCLA2
MT000681	8802	succinate-CoA ligase, α subunit	SUCLG1
MT000680	8801	succinate-CoA ligase, GDP-forming, β subunit	SUCLG2
MT001326	79783	succinyl-CoA:glutarate-CoA transferase	SUGCT
MT000585	6821	sulfite oxidase	SUOX
MT000586	6832	suppressor of var1, 3-like 1 (S. cerevisiae)	SUPV3L1
MT000587	6834	surfeit 1	SURF1
MT001167	55638	syntabulin (syntaxin-interacting)	SYBU
MT000874	23224	spectrin repeat containing, nuclear envelope 2	SYNE2
MT001155	55333	synaptojanin 2 binding protein	SYNJ2BP
MT001700	100529257	SYNJ2BP-COX16 readthrough	SYNJ2BP-COX16
MT001038	51204	translational activator of mitochondrially encoded	TACO1
MT001534	132001	TAM41, mitochondrial translocator assembly and maintenance	TAMM41
MT000589	6890	transporter 1, ATP-binding cassette, sub-family B (MDR/TAP)	TAP1
MT001348	80222	threonyl-tRNA synthetase 2, mitochondrial (putative)	TARS2
MT000590	6898	tyrosine aminotransferase	TAT
MT001526	128387	TatD DNase domain containing 3	TATDN3
MT000591	6901	tafazzin	TAZ
MT001268	64786	TBC1 domain family, member 15	TBC1D15
MT000702	9238	transforming growth factor β regulator 4	TBRG4
MT001631	285343	T cell activation inhibitor, mitochondrial	TCAIM
MT001395	84260	trichoplein, keratin filament binding	TCHP
MT000768	10312	T-cell, immune regulator 1, ATPase, H+ transporting,	TCIRG1
MT001570	157739	L-threonine dehydrogenase (pseudogene)	TDH
MT000886	23424	tudor domain containing 7	TDRD7
MT000833	11022	tudor and KH domain containing	TDRKH
MT001322	79736	transcription elongation factor, mitochondrial	TEFM
MT000592	7015	telomerase reverse transcriptase	TERT
MT000593	7019	transcription factor A, mitochondrial	TFAM
MT001031	51106	transcription factor B1, mitochondrial	TFB1M
MT001258	64216	transcription factor B2, mitochondrial	TFB2M
MT000594	7027	transcription factor Dp-1	TFDP1
MT000595	7052	transglutaminase 2	TGM2
MT000596	7054	tyrosine hydroxylase	TH
MT001502	117145	thioesterase superfamily member 4	THEM4
MT001629	284486	thioesterase superfamily member 5	THEM5
MT001110	54974	tRNA-histidine guanylyltransferase 1-like (S. cerevisiae)	THG1L
MT001332	79896	threonine synthase-like 1 (S. cerevisiae)	THNSL1
MT000950	26519	translocase of inner mitochondrial membrane 10 homolog	TIMM10
MT000948	26515	translocase of inner mitochondrial membrane 10 homolog B	TIMM10B
MT000949	26517	translocase of inner mitochondrial membrane 13 homolog	TIMM13
MT000777	10440	translocase of inner mitochondrial membrane 17 homolog A	TIMM17A
MT000762	10245	translocase of inner mitochondrial membrane 17 homolog B	TIMM17B
MT000988	29090	translocase of inner mitochondrial membrane 21 homolog	TIMM21
MT000996	29928	translocase of inner mitochondrial membrane 22 homolog	TIMM22
MT001697	100287932	translocase of inner mitochondrial membrane 23 homolog	TIMM23
MT001703	100652748	translocase of inner mitochondrial membrane 23 homolog B	TIMM23B
MT000782	10469	translocase of inner mitochondrial membrane 44 homolog	TIMM44
MT001471	92609	translocase of inner mitochondrial membrane 50 homolog (S.	TIMM50
MT000180	1678	translocase of inner mitochondrial membrane 8 homolog A	TIMM8A
MT000952	26521	translocase of inner mitochondrial membrane 8 homolog B	TIMM8B
MT000951	26520	translocase of inner mitochondrial membrane 9 homolog	TIMM9
MT001051	51300	translocase of inner mitochondrial membrane domain	TIMMDC1
MT000597	7084	thymidine kinase 2, mitochondrial	TK2
MT001623	284114	transmembrane protein 102	TMEM102
MT000684	8834	transmembrane protein 11	TMEM11
MT001393	84233	transmembrane protein 126A	TMEM126A
MT001184	55863	transmembrane protein 126B	TMEM126B
MT001148	55260	transmembrane protein 143	TMEM143
MT001058	51522	transmembrane protein 14C	TMEM14C
MT001108	54958	transmembrane protein 160	TMEM160
MT001638	340061	transmembrane protein 173	TMEM173
MT000919	25880	transmembrane protein 186	TMEM186
MT001569	157378	transmembrane protein 65	TMEM65
MT001109	54968	transmembrane protein 70	TMEM70
MT001073	51754	transmembrane protein 8B	TMEM8B
MT001146	55217	trimethyllysine hydroxylase, ε	TMLHE
MT001383	83857	transmembrane and tetratricopeptide repeat containing 1	TMTC1
MT000598	7132	tumor necrosis factor receptor superfamily, member 1A	TNFRSF1A
MT000675	8743	tumor necrosis factor (ligand) superfamily, member 10	TNFSF10
MT000599	7134	troponin C type 1 (slow)	TNNC1
MT001415	84629	trinucleotide repeat containing 18	TNRC18
MT000734	9804	translocase of outer mitochondrial membrane 20 homolog	TOMM20
MT001655	387990	translocase of outer mitochondrial membrane 20 homolog	TOMM20L
MT001203	56993	translocase of outer mitochondrial membrane 22 homolog	TOMM22
MT000821	10953	translocase of outer mitochondrial membrane 34	TOMM34
MT000779	10452	translocase of outer mitochondrial membrane 40 homolog	TOMM40
MT001391	84134	translocase of outer mitochondrial membrane 40 homolog	TOMM40L
MT001667	401505	translocase of outer mitochondrial membrane 5 homolog	TOMM5
MT001695	100188893	translocase of outer mitochondrial membrane 6 homolog	TOMM6
MT001090	54543	translocase of outer mitochondrial membrane 7 homolog	TOMM7
MT000736	9868	translocase of outer mitochondrial membrane 70 homolog A	TOMM70A
MT001498	116447	topoisomerase (DNA) I, mitochondrial	TOP1MT
MT000600	7157	tumor protein p53	TP53
MT001250	63970	tumor protein p53 regulated apoptosis inducing protein 1	TP53AIP1
MT000601	7161	tumor protein p73	TP73
MT000602	7173	thyroid peroxidase	TPO
MT000124	1200	tripeptidyl peptidase I	TPP1
MT000603	7187	TNF receptor-associated factor 3	TRAF3
MT000604	7189	TNF receptor-associated factor 6, E3 ubiquitin protein	TRAF6
MT000860	22906	trafficking protein, kinesin binding 1	TRAK1
MT001298	66008	trafficking protein, kinesin binding 2	TRAK2
MT000753	10131	TNF receptor-associated protein 1	TRAP1
MT001057	51499	TP53 regulated inhibitor of apoptosis 1	TRIAP1
MT000837	11074	tripartite motif containing 31	TRIM31
MT001194	56658	tripartite motif containing 39	TRIM39
MT001098	54802	tRNA isopentenyltransferase 1	TRIT1
MT001102	54931	tRNA methyltransferase 10 homolog C (S. cerevisiae)	TRMT10C
MT001337	79979	tRNA methyltransferase 2 homolog B (S. cerevisiae)	TRMT2B
MT001226	57570	tRNA methyltransferase 5	TRMT5
MT001119	55006	tRNA methyltransferase 61B	TRMT61B
MT001170	55687	tRNA 5-methylaminomethyl-2-thiouridylate methyltransferase	TRMU
MT001026	51095	tRNA nucleotidyl transferase, CCA-adding, 1	TRNT1
MT000750	10102	Ts translation elongation factor, mitochondrial	TSFM
MT001227	57616	teashirt zinc finger homeobox 3	TSHZ3
MT000094	706	translocator protein (18kDa)	TSPO
MT000605	7263	thiosulfate sulfurtransferase (rhodanese)	TST
MT001099	54902	tetratricopeptide repeat domain 19	TTC19
MT000606	7267	tetratricopeptide repeat domain 3	TTC3
MT000607	7284	Tu translation elongation factor, mitochondrial	TUFM
MT000853	11334	tumor suppressor candidate 2	TUSC2
MT000644	7991	tumor suppressor candidate 3	TUSC3
MT000608	7295	thioredoxin	TXN
MT000916	25828	thioredoxin 2	TXN2
MT000797	10628	thioredoxin interacting protein	TXNIP
MT000609	7296	thioredoxin reductase 1	TXNRD1
MT000796	10587	thioredoxin reductase 2	TXNRD2
MT000197	1890	thymidine phosphorylase	TYMP
MT000610	7298	thymidylate synthetase	TYMS
MT001130	55075	uveal autoantigen with coiled-coil domains and ankyrin	UACA
MT000612	7317	ubiquitin-like modifier activating enzyme 1	UBA1
MT000611	7314	ubiquitin B	UBB
MT000994	29914	UbiA prenyltransferase domain containing 1	UBIAD1
MT000613	7345	ubiquitin carboxyl-terminal esterase L1 (ubiquitin	UCHL1
MT000614	7350	uncoupling protein 1 (mitochondrial, proton carrier)	UCP1
MT000615	7351	uncoupling protein 2 (mitochondrial, proton carrier)	UCP2
MT000616	7352	uncoupling protein 3 (mitochondrial, proton carrier)	UCP3
MT000617	7374	uracil-DNA glycosylase	UNG
MT001147	55245	ubiquinol-cytochrome c reductase complex assembly factor 1	UQCC1
MT001404	84300	ubiquinol-cytochrome c reductase complex assembly factor 2	UQCC2
MT000992	29796	ubiquinol-cytochrome c reductase, complex III subunit X	UQCR10
MT000825	10975	ubiquinol-cytochrome c reductase, complex III subunit XI	UQCR11
MT000618	7381	ubiquinol-cytochrome c reductase binding protein	UQCRB
MT000619	7384	ubiquinol-cytochrome c reductase core protein I	UQCRC1
MT000620	7385	ubiquinol-cytochrome c reductase core protein II	UQCRC2
MT000621	7386	ubiquinol-cytochrome c reductase, Rieske iron-sulfur	UQCRFS1
MT000622	7388	ubiquinol-cytochrome c reductase hinge protein	UQCRH
MT000958	27089	ubiquinol-cytochrome c reductase, complex III subunit VII,	UQCRQ
MT000671	8725	URI1, prefoldin-like chaperone	URI1
MT000623	7390	uroporphyrinogen III synthase	UROS
MT001427	84833	up-regulated during skeletal muscle growth 5 homolog	USMG5
MT001424	84749	ubiquitin specific peptidase 30	USP30
MT001392	84196	ubiquitin specific peptidase 48	USP48
MT001343	80146	UDP-glucuronate decarboxylase 1	UXS1
MT000655	8409	ubiquitously-expressed, prefoldin-like chaperone	UXT
MT000588	6843	vesicle-associated membrane protein 1 (synaptobrevin 1)	VAMP1
MT000669	8673	vesicle-associated membrane protein 8	VAMP8
MT000624	7407	valyl-tRNA synthetase	VARS
MT001216	57176	valyl-tRNA synthetase 2, mitochondrial	VARS2
MT001489	114990	vasorin	VASN
MT000786	10493	vesicle amine transport 1	VAT1
MT000625	7416	voltage-dependent anion channel 1	VDAC1
MT000626	7417	voltage-dependent anion channel 2	VDAC2
MT000627	7419	voltage-dependent anion channel 3	VDAC3
MT000628	7428	von Hippel-Lindau tumor suppressor, E3 ubiquitin protein	VHL
MT001660	391104	von Hippel-Lindau tumor suppressor-like	VHLL
MT001407	84313	vacuolar protein sorting 25 homolog (S. cerevisiae)	VPS25
MT000629	7444	vaccinia related kinase 2	VRK2
MT000864	23078	von Willebrand factor A domain containing 8	VWA8
MT000772	10352	tryptophanyl tRNA synthetase 2, mitochondrial	WARS2
MT000841	11152	WD repeat domain 45	WDR45
MT001190	56270	WD repeat domain 45B	WDR45B
MT001127	55062	WD repeat domain, phosphoinositide interacting 1	WIPI1
MT000937	26100	WD repeat domain, phosphoinositide interacting 2	WIPI2
MT001072	51741	WW domain containing oxidoreductase	WWOX
MT001097	54739	XIAP associated factor 1	XAF1
MT001247	63929	X-prolyl aminopeptidase (aminopeptidase P) 3, putative	XPNPEP3
MT000630	7517	X-ray repair complementing defective repair in Chinese	XRCC3
MT001021	51067	tyrosyl-tRNA synthetase 2, mitochondrial	YARS2
MT001079	54059	ybeY metallopeptidase (putative)	YBEY
MT000801	10652	YKT6 v-SNARE homolog (S. cerevisiae)	YKT6
MT000805	10730	YME1-like 1 ATPase	YME1L1
MT001318	79693	yrdC N(6)-threonylcarbamoyltransferase domain containing	YRDC
MT000631	7529	tyrosine 3-monooxygenase/tryptophan 5-monooxygenase	YWHAB
MT000632	7531	tyrosine 3-monooxygenase/tryptophan 5-monooxygenase	YWHAE
MT000633	7532	tyrosine 3-monooxygenase/tryptophan 5-monooxygenase	YWHAG
MT000634	7533	tyrosine 3-monooxygenase/tryptophan 5-monooxygenase	YWHAH
MT000824	10971	tyrosine 3-monooxygenase/tryptophan 5-monooxygenase	YWHAQ
MT000635	7534	tyrosine 3-monooxygenase/tryptophan 5-monooxygenase	YWHAZ
MT001626	284273	zinc binding alcohol dehydrogenase domain containing 2	ZADH2
MT001246	63920	zinc finger, BED-type containing 8	ZBED8
MT000993	29801	zinc finger, DHHC-type containing 8	ZDHHC8
MT000046	463	zinc finger homeobox 3	ZFHX3
MT001077	53349	zinc finger, FYVE domain containing 1	ZFYVE1
MT001378	83637	zinc finger, MIZ-type containing 2	ZMIZ2
MT000636	7753	zinc finger protein 202	ZNF202
MT000637	7755	zinc finger protein 205	ZNF205

## Sheet: critical pathways in mito03
1. OXPHOS subunits, assembly factors, and electron carriers				2. Mitochondrial DNA maintenance, expression, and translation								6. Metabolism of toxic compounds
CⅠsubunits	CⅡ subunits	CⅣ subunits		Replication, maintenance and transcription	RNA processing	Translation regulation	Mitochondrial tRNAs	Mitochondrial tRNA synthetases				D2HGDH
MT-ND1	SDHA	COX4I1		DNA2	ELAC2	C12orf65	MT-TA	AARS2				ECHS1
MT-ND2	SDHB	COX4I2		FBXL4	ERAL1	C1QBP	MT-TC	CARS2				ETHE1
MT-ND3	SDHC	COX5A		MGME1	GTPBP3	GFM1	MT-TD	DARS2				HBCH
MT-ND4	SDHD	COX6A1		MPVI7	HSD17B10	GFM2	MT-TE	EARS2				HTT
MT-ND4L		COX6A2		POLG	LRPPRC	GUF1	MT-TF	FARS2				IDH2
MT-ND5	CⅡ assembly factors	COX6B1		POLG2	MRM2	RMND1	MT-TG	GARS				L2HGDH
MT-ND6	SDHAF1	COX7B		RNASEH1	MTO1	TSFM	MT-TH	GATB				SLC25A1
NDUFA1	SDHAF2	COX8A		SLC25A4	MTPAP	TUFM	MT-TI	GATC				TXN2
NDUFA2		MT-CO1		SSBP1	NSUN3		MT-TK	HARS2				TXNIP
NDUFA6	CⅢ subunits	MT-CO2		TMEM65	PNPT1	Mitochondrial ribosomes	MT-TL1	IARS2
NDUFA9	CYC1	MY-CO3		TWNK	PUS1	MRPL3	MT-TL2	KARS
NDUFA10	MT-CYB	NDUFA4			TRIT1	MRPL12	MT-TM	LARS2
NDUFA11	UQCRB			Nucleotide pool maintenance	TRMT5	MRPL44	MT-TN	MARS2
NDUFA12	UQCRC2	CⅣ assembly factors		ABAT	TRMT10C	MRPS2	MT-TP	MTFMT
NDUFA13	UQCRFS1	CEP89		DGUOK	TRMU	MRPS7	MT-TQ	NARS2
NDUFB3	UQCRQ	COA3		RRM2B	TRNT1	MRPS14	MT-TR	PARS2
NDUFB8		COA5		SAMHD1		MRPS16	MT-TS1	QRSL1
NDUFB9	CⅢ assembly factors	COA6*		SUCLA2		MRPS22	MT-TS2	RARS2
NDUFB10	BCS1L	COA7		SUCLG1		MRPS23	MT-TT	SARS2
NDUFB11	LYRM7	COX10*		TK2		MRPS25	MT-TV	TARS2
NDUFS1	TTC19	COX14		TYMP		MRPS28	MT-TW	VARS2
NDUFS2	UQCC2	COX15*				MRPS34	MT-TY	WARS2
NDUFS3	UQCC3	COX20				MT-RNR1		YARS2
NDUFS4		FASTKD2				PTCD3
NDUFS5	Coenzyme	OXA1L*
NDUFS6	Q10	PET100
NDUFS7	COQ2	PET117
NDUFS8	COQ4	SCO1*
NDUFV1	COQ5	SCO2*
NDUFV2	COQ6	SURF1
	COQ7	TACO1
CⅠassembly factors	COQ8A
ACAD9	COQ8B	CⅤ subunits
FOXRED1	COQ9	ATP5F1A
NDUFAF1	PDSS1	ATP5F1D
NDUFAF2	PDSS2	ATP5F1E
NDUFAF3		MT-ATP6
NDUFAF4	Cytochrome C	MT-ATP8
NDUFAF5	CYCS*
NDUFAF6	HCCS*	CⅤ assembly factors
NDUFAF8		ATPAF2
NUBPL*	Other	ATP5MD
TIMMDC1	RTN4IP1	OXA1L*
TMEM126B		TMEM70
3. Mitochondrial dynamics, homeostasis, and quality control				4. Metabolism of substrates		5. Metabolism of cofactors
Fusion	Mitochondrial protein quality control			Fatty acid oxidation	GOT2	BOLA3	BTD	COX10*
MFN2	AFG3L2			ETFA	MDH1	FDX1L	HLCS	COX15*
NME3	ATAD3A			ETFB	SLC25A13	FDXR	PC*	CYCS*
	CLPB			ETFDH	DLAT	FXN	SLC19A3	HCCS*
Fission	CLPP			HADHA	DLD*	GLRX5	SLC25A19	PPOX
DNM1L	HSPD1			HADHB	PC*	IBA57	TPK1	SFXN4
GDAP1	HTRA2			SLC22A5	PDHA1	ISCA1	DLD*	SLC25A38
MFF	LONP1			SLC25A20	PDHB	ISCA2	LIAS	COASY
STAT2	MIPEP				PDHX	ISCU	LIPT1	PANK2
SLC25A46*	PITRM1			Ketone bodies	PDK3	LYRM4	LIPT2	SLC25A42
	PMPCB			ACAT1	PDP1	NFS1	MCAT	COA6*
Stability	SACS			HMGCL	Mitochondrial carriers	NFU1	MECR	SCO1*
OPA1	SPG7			HMGCS2	MPC1	NUBPL*	FLAD1	SCO2*
				OXCT1	SLC25A3		SLC25A32	NADPH metabolism
MICOS complex	Mitochondrial membrane phospholipid and import machinery				SLC25A10			NADK2
CHCHD10	AGK				SLC25A12			NAXD
C19orf70*	AIFM1			CASA	SLC25A26			NAXE
SLC25A46*	DNAJC19			PC*
	GFER
Morphology	OPA3
MIEF2	PAM16			ACO2
MSTO1	PISD			DLST
YME1L1	PMPCA			FH
	SERAC1			IDH3A
Apoptosis defect	TAZ			IDH3B
APOPT1	TIMMBA			MDH2
	TIMM22
Ca2+ homoeostasis	TIMM50
C19orf70	TOMM70
MICU1	XPNPEP3
MICU2

## Sheet: ATAD3A-TurboID04
ATAD3A-TurboID interacted proteins
Gene name
Sec22b
Alyref
Psmb1
Psmd14
Anxa3
Api5
Psmb5
Sfn
Col11a1
Comt
Idh1
Slc3a2
H1-0
Pdcd6
Umps
Impdh2
Glud1
Map4
Atxn10
Marcksl1
Aimp1
Drg1
Rab5c
Pdha1
Cd9
Eci1
Septin2
H1-4
Stt3a
Rpl36
Hspa4l
Cox7a2
Mcm5
Cast
Osm
Arpp19
Fus
Ythdf1
Dad1
HDAC3
Mtpn
Rps15
Rpl31
Elavl1
Csrp1
Fabp5
Gmps
Ddb1
Dennd4b
Lbr
Katnal2
Acaca
Hells
Mapre1
Mrps31
Ssr4
Zyx
Maoa
Myo6
Nop58
Dnajc8
Tra2a
Cand1
Atp5mk
Mtch2
Naa15
Ubap2l
Aard
Klhl26
Iars2
Ckap4
Ralyl
Uba6
Mtrf1
Dnm1l
Pnpt1
Eif3c
Dync1li1
Rcc1
Fubp1
Atl3
Pcca
Nop2
Xpo5
Atad3
Stoml2
Dpp3
Rtcb
Dpy30
Mccc1
Rrbp1
Npm3
Tomm22
Decr1
Bzw1
Txndc17
Rer1
Pmpcb
Ssr1
Tmed10
Chordc1
Syap1
Tomm20
Eif3f
Etfb
Atp5pd
Upf1
Pdcd6ip
Timm8a1
Timm44
Txn
Rplp2
H4c16
Hspe1
Rac1
Csnk2b
Cdc42
Atp5f1d
Ddx39a
Ybx1
Uap1l1
Tnpo1
Naca
H2bc8
Sdha
Rps27a
Calm3
Rbmxl1
Rpl10a
Cnn2
Ptma
Rpl27
Dnaja1
Snd1
Eif5
Lars1
Tpm3
Eif4g2
Rpl13a
Cttn
Arpc2
Cav1
Eif1b
Prep
Tmpo
Ppa1
H1-5
Vim
Cad
Rps13
Cct8
Atp5f1a
Gdi2
Fkbp4
Eif4b
Mdh2
Ranbp1
Kars1
Rps7
Dnaja2
Eef1g
Rps25
Nono
Calr
H2ax
Arf3
Vdac1
Pdia4
Rps24
Tuba1b
P4hb
Sae1
Acot7
Prdx4
Plec
Nap1l1
Hsp90ab1
Ncl
Pa2g4
Banf1
Set
S100a10

## Sheet: 01&04
01glycogen enriched proteins	04ATAD3A-TurboID
Nova2	Sec22b
Slc9a6	Alyref
Cul4b	Psmb1
Arfgef2	Psmd14
Chd5	Anxa3
Ptprf	Api5
Ckap5	Psmb5
Rap1gap	Sfn
Shroom2	Col11a1
Plch2	Comt
Scn1a	Idh1
Skt	Slc3a2
Agrn	H1-0
Slc25a25	Pdcd6
Arid1a	Umps
Mtr	Impdh2
Armt1	Glud1
Itih4	Map4
Nlgn4l	Atxn10
Ptprs	Marcksl1
Grik3	Aimp1
Scn2a	Drg1
Nfx1	Rab5c
Dlgap4	Pdha1
Gnai1	Cd9
Apba1	Eci1
Plxnb2	Septin2
Ildr2	H1-4
Clip3	Stt3a
Cttnbp2	Rpl36
Ptprz1	Hspa4l
H2ac4	Cox7a2
Akap5	Mcm5
Safb	Cast
Shank1	Osm
Rbm24	Arpp19
Gls	Fus
Prrt2	Ythdf1
Fga	Dad1
Pi4ka	HDAC3	←
Ryr2	Mtpn
Arid1b	Rps15
Dsp	Rpl31
Nolc1	Elavl1
Numa1	Csrp1
Heg1	Fabp5
Nrxn2	Gmps
Dnah1	Ddb1
Rap1gds1	Dennd4b
Dlg5	Lbr
Syngap1	Katnal2
Tpr	Acaca
Farp1	Hells
Atp2b1	Mapre1
Ank3	Mrps31
Hk2	Ssr4
Capn2	Zyx
S1pr1	Maoa
Cacna2d1	Myo6
Bin1	Nop58
Sec22b	Dnajc8
Dpysl2	Tra2a
Emd	Cand1
Alyref	Atp5mk
Clta	Mtch2
Pten	Naa15
Stxbp1	Ubap2l
Endog	Aard
Mttp	Klhl26
Myh11	Iars2
Sema3a	Ckap4
HDAC3	Ralyl
Kng1	Uba6
Ngp	Mtrf1
Prdx6	Dnm1l	←
Casp6	Pnpt1
Ampd3	Eif3c
Unc5c	Dync1li1
Dld	Rcc1
Hsd17b10	Fubp1
Ube3a	Atl3
Tcof1	Pcca
Dctn1	Nop2
Prkcsh	Xpo5
Prdx4	Atad3	←
Diaph1	Stoml2
Eftud2	Dpp3
Gfra2	Rtcb
RO60	Dpy30
Pik3r2	Mccc1
Faah	Rrbp1
Aip	Npm3
Flot1	Tomm22
Numbl	Decr1
Cyth3	Bzw1
Sdcbp	Txndc17
Pex5	Rer1
Psmb1	Pmpcb
Ptgds	Ssr1
Ntn1	Tmed10
Sema4d	Chordc1
Gsto1	Syap1
Man2b1	Tomm20
Sod3	Eif3f
Gclm	Etfb
Amacr	Atp5pd
Agpat1	Upf1
Scarb2	Pdcd6ip
Phb2	Timm8a1
Ncam2	Timm44
Atp5if1	Txn
Terf2	Rplp2
Col15a1	H4c16
Cenpa	Hspe1
Psmd4	Rac1
Exoc7	Csnk2b
Dhx15	Cdc42
Purb	Atp5f1d
Srsf5	Ddx39a
Kpna4	Ybx1
Capn1	Uap1l1
Nrp2	Tnpo1
Anp32a	Naca
Exoc4	H2bc8
Efnb3	Sdha
Pld3	Rps27a
Folh1	Calm3
Dhodh	Rbmxl1
Prrt1	Rpl10a
Fkbp8	Cnn2
Slc27a2	Ptma
Cdk14	Rpl27
Stx1a	Dnaja1
Rabep1	Snd1
Psmd14	Eif5
Adam10	Lars1
Npc1	Tpm3
Bmpr2	Eif4g2
Scamp3	Rpl13a
Pmm1	Cttn
Slc32a1	Arpc2
Anxa3	Cav1
Ap1b1	Eif1b
C1qbp	Prep
Hap1	Tmpo
Mgll	Ppa1
Syt3	H1-5
Nudc	Vim
Bcat2	Cad
Cops5	Rps13
Slc1a4	Cct8
Cdk5r2	Atp5f1a
Ctnnd2	Gdi2
Fxn	Fkbp4
Aldh1a7	Eif4b
Pitpnm1	Mdh2
Psmb10	Ranbp1
Sdc4	Kars1
Cavin1	Rps7
Aox1	Dnaja2
Ap3d1	Eef1g
Srpk2	Rps25
Rgs7	Nono
Csnk2a2	Calr
Hmgb3	H2ax
Itgb3	Arf3
Cd200	Vdac1	←
Reps1	Pdia4
Pakap	Rps24
Smarce1	Tuba1b
Dnajb6	P4hb
Sema6b	Sae1
Crym	Acot7
Slk	Prdx4
Prom1	Plec
Cntnap1	Nap1l1
Bnip3	Hsp90ab1
Trappc3	Ncl
Cacna1b	Pa2g4
Pgrmc1	Banf1
Impa1	Set
Entpd2	S100a10
Copb2
Nck2
Snca
Tpmt
Impact
Syngr1
Bloc1s1
Strn
Septin7
Eif6
Acot1
Rpl35a
Atp2a2
Pja1
Cd59a
Supt5h
Psmb5
Dhx9
Pip5k1c
Fcn1
Stmn3
Pip4k2a
Eif3d
Aif1
Atp9a
Pgam2
Hmox2
Sgce
Ptp4a2
Grk6
Itgb5
Nmt1
Epb41l2
Gpx4
Per3
Gpld1
Pdlim1
Fzd1
Fhl2
Psma3
Stx7
Gnaz
Slc16a7
Sfn
Vamp4
Snx3
Hsd17b12
Srpk1
Dtnb
Cask
Cfdp1
Sorl1
Nid2
Wdr1
Slc4a4
Vti1b
Adcy1
Klc1
Klc2
Capns1
Dync1i1
Dync1i2
Pde8a
Cntfr
Ppt1
Ddc
Cops3
Hnrnpa2b1
Lrp6
Slc6a20b
Comt
Becn1
Cacng2
Gosr1
Pak1
Emp2
Clpp
Hcn2
Ctbp1
Map7
Bsn
Gdap1
Tom1
F11r
Dcx
Stam2
Adam15
Idh1
Mpp3
Syn1
Lin7c
Gnpda1
Stx8
Olfm1
Cpd
Afm
Robo1
Mkln1
Itm2b
Coro1a
Pde4a
Rbm3
Fhit
Lancl1
Vti1a
Mt-Cyb
Mtco1
Hprt1
Ca2
C3
C4b
Jchain
Thy1
Ighg2b
Ighg1
Ighm
B2m
H2-L
H2-Q10
H2-K1
Hba
Hbb-b1
Hbb-b2
Hbb-y
H3-5
Lamc1
Lamb1
Krt10
Mt2
Gfap
Krt1
Cfb
Mb
Mbp
Araf
Slc4a1
Prnp
Aldoc
Aldoa
Got1
Got2
Tuba1b
Src
Itgam
Ldha
C5
Apoa4
Gpi
Ctsl
Ptprc
Me1
Enpp1
Gap43
Cfh
Anxa2
Klk1b8
Alb
Serpina1a
Serpina3k
Hsp90aa1
Pdia4
Aprt
Spta1
Ltf
Cbr2
Hsp90b1
Col4a2
Apoe
Sod1
Mdh2
Camk4
Fcgr3
Nefl
Nefm
Nras
Gnai2
Polr2a
Itgb1
P4hb
Alpl
Ncl
Pgk1
Ace
Fth1
Hmgn2
Sod2
Apoa2
Nudt10
Chmp6
H2az1
Lrrc4b
Nrxn1
Calm1
Lynx1
Anxa1
Eef1a1
Nid1
Alad
Ctsb
Mapt
Txn
Gstm1
Tcea1
Rras
Slc3a2
H2bc7
H1-0
Sub1
Mpo
Fn1
Gpx1
Fabp3
Lamp1
Hsp90ab1
Dmd
L1cam
Itga5
Camk2a
Itgb2
Agt
Itpr1
Tcp1
App
Mdk
Gusb
Prkar2a
Pfkl
Chrm1
Calb1
Pdcd6
Prkar1b
Cntn1
Rpl7a
Gsn
Ncam1
Gpd1
Dnmt1
Atp1b1
C1qb
Rpl27a
Rps16
Rpl7
Mdh1
Rpsa
Calr
Atp1b2
Srp54
Hspb1
Lmnb1
Anxa6
Crp
Rplp0
Map1b
Glul
Cdh2
Insr
Ntrk2
Bpgm
Cd44
Kcnc1
Sptb
Nme1
H1-2
Klk1b9
Lgals1
Prkce
Ldhb
Lcat
Cnp
Mmut
D1Pas1
Kcna1
Kcna3
Enpep
Ass1
Sptan1
Gapdh
Lamp2
Hmga1
Hspa2
Eno1
Eno2
Ptbp1
Ap2a1
Ap2a2
Gba1
Selenbp1
Hk1
Ppia
Tpi1
Slc2a1
Hspa1b
Ptpra
Ctsd
Bsg
Slc7a2
Cfl1
Phka1
Gnao1
Fasn
Lama1
Gstp1
F2
Nefh
Rpl13a
Hspa5
Hexb
Prdx3
Vim
F3
Map2
Prkca
Fcer1g
Mag
Plg
Tpm3
Gna11
Gnaq
Akr1b7
Abcb1a
Cst3
Eno3
Gc
Lmnb2
Pcsk2
Ache
Mfge8
Tgm2
Emb
Penk
Fech
Ptgs1
Serpina1b
Cbl
Gabrg2
Ap1g1
Gabrd
Eif3a
Cbx3
Gja1
Xrcc6
Pnp
Pcmt1
Gfus
Glb1
Gria1
Gria2
Cryab
Ces1c
Cat
Bcat1
Ppib
Capg
Gsta4
Lta4h
Th
Impdh2
Aldh1a1
M6pr
Ndn
Rps2
Timp2
Lyn
Ubtf
Tln1
Ezr
Msn
Rdx
Gabra3
Fcgr1
Ctnna1
Klkb1
Chga
Ptma
U2af2
Glud1
Pik3r1
Sars1
Marcks
Fkbp1a
Snrpb
Map4
Gna13
Plaa
Xrcc5
Rpl3
H2ax
Pdia3
Psmb8
Aco1
Apex1
Adh5
Dusp1
Slc6a9
Max
Adss1
Camk2b
Nap1l1
Nckap1
Septin4
Napb
Mug1
Marcksl1
Kif5c
Kif2a
Grn
Ptprm
Dpp4
Prkcd
Pabpc1
Nos2
Vcam1
Nedd8
Ahsg
Vtn
Ckmt1
Fkbp4
Hmgb2
Sstr2
C5ar1
Ctnnd1
Aimp1
Prkar2b
Slc6a1
Slc6a13
Slc6a11
S100a9
Dbi
Map2k1
Scp2
Slc2a3
Ssb
Serpinc1
Nectin2
Wars1
Kif1a
Apoc3
Ranbp1
Ptk2
Ephx2
Apoc1
Ptpn11
Rab3d
Rab5c
Rab6a
Rab21
Rab12
Rab23
Rab24
Rab18
Grin2a
Grin1
Pdha1
Fah
Fbl
Canx
Ap1m1
Prdx1
Cd81
Gpm6a
Gpm6b
Rpl12
Rpl18
Cpox
Ppm1b
Por
Hmgcl
Hspa9
Mbl1
Dnm1
Grik2
Man1a2
Tjp1
Fyn
Cap1
Tkt
Vps26a
Vhl
Tfam
Rpl28
Ltb
Cetn1
Acsl1
Eci1
Septin2
Eps15
Pura
Htt
Cct8
Slc1a2
H1-4
H1-1
H1-5
Itgav
Sdc2
Akr1b1
Cfl2
Man1a1
Acadm
Rangap1
Syt1
Syt2
Gpx3
Cdkn1b
Nsf
Vps4b
Psmc2
Rab11b
Ina
Nf2
Adss2
Brcc3
Nedd4
Yap1
Stt3a
Rph3a
Aldh2
Aldh3a1
Aldh3a2
Cnr1
Capza2
Capzb
Nsg2
Gsr
Map2k4
Pfkm
Igfbp4
Rpl6
Rpl29
Crat
Crkl
Rpl5
Rpl13
Rpl36
Anxa5
Epb41
Gad1
Gad2
Ppp3cb
Ppp3cc
Lmna
Cbr1
Gstm5
Slc25a4
Cit
Camlg
Hnrnpa1
Ppm1a
Ptpre
Pcyt1a
Cdk5
Psma2
Psen1
Tmod1
Cav1
Impdh1
S100b
Hsd17b8
Hsd11b1
Ahcy
Fmo1
Gdi1
Sts
Arsa
Arsb
Shmt1
Krt6a
Atp6v1a
Atp6v1e1
Acadvl
Gabrb1
Pa2g4
Tub
Rab7a
Acadl
Rpl9
Plcb3
Camp
Gla
Gpc4
Hsd17b4
Clcn3
Adcy9
Gss
Hdgf
Atp6v0d1
Fabp7
Slc25a5
Apod
Clgn
Tst
Pkm
Ube2e1
Ndufs6
Upp1
Rida
Efnb2
Cpt2
Tia1
Hmga2
Rpl10a
Dbt
Rabggtb
Pitpna
Pitpnb
Slc16a1
Rab2a
Cnbp
Idh2
Dnajc2
Stom
Stmn1
Cacnb3
Rad23b
Ephb3
Ephb2
Psmc4
Galc
Adsl
Ddx6
Slc12a2
Ncan
Aqp4
Tyro3
Rab8a
Cdh11
Lrpap1
Entpd1
Stmn2
Gfer
Rab4a
Cda
Cyb5a
Usp5
Atp5f1b
Cckbr
Cd38
Slc1a3
Wfs1
Bace1
Fus
Ncstn
Eef1d
Actn4
B3gat3
Smpdl3b
Eef2
Opa1
Ptpa
Strn4
Hrh3
Tpm1
Tpm2
Mrtfb
Dock4
Il1rapl1
Sst
Ruvbl1
Plp1
Eif3e
Pcbp1
Ppfia3
Pdxp
Gabarapl2
Nploc4
Actb
Mdga2
Nrgn
Morf4l1
Rac3
Cdc42
Cirbp
Lzts1
Rps20
Snap25
Dnajc5
Rab5b
Chp1
Rab10
Rab8b
Ube2d3
Ube2d1
Ube2k
Ube2n
Fgf1
Actr2
Cops2
Abce1
Rap2b
Rpl26
Stx1b
Psme3
Rab6b
Fgf12
Rpl27
Pcbd1
Rpl37a
Sec61a1
Arf4
Lpar1
Abat
Sumo2
Wdr5
Hnrnpk
Ywhag
Usp46
Rras2
Ppp1ca
Ppp1cb
Psmc1
Psmc5
Rps8
Rps15a
Ube2h
Ywhae
Rps18
Rps13
Snrpd1
Snrpd2
Snrpd3
Arf6
Selenot
Kcnab2
Abi2
Rab11a
Tsc22d1
Eef1a2
Ppp2cb
Rpl18a
Acta2
Ap2s1
Rhob
Rpl23a
Rps6
H4c1
Gabra1
Atp6v1b2
Rab1A
Rab3c
Ran
Rap1a
Rps15
Rps25
Rps28
Fau
Elob
Gnb1
Rbx1
Gnb2
Gnb5
Rpl30
Cycs
Rpl31
Rps3
Gtf2b
Rpl8
Ybx1
Pfn1
Rps27a
Tra2b
Tle5
Pafah1b1
Rab3a
Hspa8
Vamp3
Tpt1
Cyth2
Dnaja1
Hspd1
Cplx1
Vamp2
Eif4e
Gabrb3
Mapk1
Ppp1cc
Ptn
Gnas
Ywhaz
Gabrb2
Kcna2
Kcnab1
Hmgb1
Snrpn
Dynll1
Pcsk1
Kcnj3
Rps17
Ube2i
Selenow
Prkcg
Rala
Rps12
Rps10
Ppp3ca
Ppp2ca
Phb1
Csnk2b
Rpl22
Ube2l3
Rack1
Prkacb
Ywhaq
Tuba4a
Tubb4b
Prkcb
Cntn5
Ywhah
Ranbp9
Sbds
Kpnb1
Dlg3
Pip5k1a
Psmb7
Adcyap1r1
Plxna1
Plxna2
Dcc
Chl1
Ebp
Nfic
Pfkfb2
Selenop
Surf6
Vamp7
Hdac2
Mpp1
Pebp1
Stim1
Rock1
Rock2
Bcl2l2
Hint1
Ufd1
Elavl1
Usp9x
Tp53bp1
Cux1
Cdh10
Slc8a1
Slc7a3
Evl
Nherf1
Stx4
Ldb1
Sparcl1
Naca
Casp3
Urod
Gaa
Atp8a1
Uty
Cct7
Cct2
Cct4
Cct5
Cct6a
Cct3
Ptprn2
Nucb2
Atf1
Renbp
Tnik
Wnk1
Rpl36a
Eloc
Hpca
Arf5
Cplx2
Ap2m1
Rhog
Rpl19
Srsf3
Adcy5
Rpl10l
Serping1
Serpinf1
Nptn
Cdh6
Nrp1
Nxn
Rps3a
S100a13
Sptlc2
Atp1b3
Anxa11
Crmp1
Slc30a3
Cacna1a
Fhl1
Anpep
Rps5
Pam
Ppp4c
Coq7
Rgs14
Gclc
Wbp2
Grm1
Gfra1
Cxadr
Sirpa
Neo1
Fh
Anp32e
Lypla1
G3bp1
Casp7
Lama4
Scn1b
C1qa
Vldlr
Atp8a2
Tubb5
Psmb4
Prdx5
Stx2
Cpe
Xdh
Il6st
G6pdx
Apoa1
Itga4
Serpina1d
Serpina1e
Yy1
Rbp1
Pde1b
Grin2b
Egfr
Adra2a
Apoh
Sec23a
Nme2
Vcp
Aqp1
Uba1
C1qc
Ctnnb1
Jup
Ank1
Nucb1
Chat
Epha4
Aplp1
Enah
Atp5f1a
Scg2
Ckb
Smpd1
Nf1
Yes1
Top1
Sox8
Apoc2
Mark2
Hspg2
Fabp5
Pc
Eml1
Larp7
Eif5b
Aplp2
Clu
Anxa7
Igfbp5
Igf2r
Ambp
Tle3
Lyar
Kcnma1
Pecam1
Eps8
Padi2
Cd36
Fbln1
Ssrp1
Slc7a1
B4galnt1
Ubxn2b
Trio
Itgb8
Vgf
Npepps
Grm2
Phactr1
Psd3
Pi4k2a
Lrfn1
Slc39a7
Osbp
Emc10
Cul4a
Abraxas2
Plbd2
Rogdi
Stt3b
Hp1bp3
Lpcat1
Myl12b
Gtf2f1
Gmps
Mat2a
Ric8a
Pde12
Zc3h15
Smarca4
Tmem38a
Map9
Krt2
Ccdc136
Pbxip1
Pip4p1
Cnnm2
Srsf6
Slc17a7
Smyd5
Slc25a33
Esyt2
Ogfod1
Trappc9
Khsrp
Pag1
Ddb1
Tmem231
Rnf149
Rnf40
Lmf1
Cmpk2
Esyt1
Lbr
Ube2z
Nt5c3b
Nat8l
Dip2b
Wnk2
Plxnd1
Adgrb1
Snx27
Agap2
Aak1
Slc2a13
Tenm4
Mettl14
Rmdn3
Tax1bp1
Gpd1l
Parp3
Mcu
Hdgfl2
Eml4
Lclat1
Gprin1
Sec31a
Slmap
Ccdc51
Peg3
Plcl1
Sorbs2
Tbc1d24
Them4
Pgap1
Ermp1
Vps51
Slc30a10
Grm5
Macrod2
Elapor2
Tmem237
Endou
Nt5c2
Mthfd1l
Itga1
Carmil2
Shank3
Abl2
Oxr1
Unc13a
Ece1
Sez6l2
Tapt1
Maea
Ddx17
Phactr4
Srrm1
Thrap3
Scn2b
Spag9
Stxbp5l
Mypn
Slc4a10
Psd
Lrrc8b
Ermn
Taok1
Slc39a12
Cemip2
Xkr4
Taf3
Slc30a9
Dph1
Crppa
Brsk1
Islr2
Cyfip2
Fbxw11
Abr
Arhgap44
Psme4
Specc1
Myo1d
Lmtk3
Arcn1
Sema5b
Kif1b
Ogdh
Cttn
Kcnh1
Myl6
Adora1
Adora2a
Icam5
Epha5
Grb2
Flot2
Clpb
Hnrnpd
Ptprn
Lama2
Ppp5c
Psmb6
Samhd1
Slc27a1
Csnk2a1
Slc30a1
Bag1
Khdrbs1
Igf1r
Gcdh
Irgm1
Stxbp3
Cldn11
Gas7
Traf3
Ppp1r1b
Col12a1
Stip1
Caprin1
Reep5
Arhgef2
Eps15l1
Ggt1
Vdac2
Vdac3
Vdac1
Coq8a
Kpna1
Pla2g7
Rbbp4
Xiap
Cyp7b1
Ppp2r5c
Gng7
Asns
Tmpo
Pak3
Usf1
Ppm1g
Cdc37
Fzd7
Ksr1
Abcb7
Cfi
Prpf4b
Astn1
Cp
Ctcf
Slc9a1
Mapre1
Prdx2
Tsg101
Hcfc1
Pafah1b3
Psap
Dyrk1a
Lcp1
Fnta
Igbp1
Soat1
Acan
Cacna1e
Lamb2
Ctnna2
Slc6a3
Cntn2
Bcap31
Bad
Bcan
Cox7a2l
Mme
Hras
Hadh
Znf638
Smarcd1
Msi1
Pde1a
Alcam
Nt5e
Erbb4
Glg1
Ewsr1
Snap91
Fscn1
Igfbp7
Ktn1
Gdi2
Grid1
Pacsin1
Hp
Ddx5
Cbx5
Atrx
Hsph1
Elavl4
Il1rap
Cd47
Itga7
Itga6
Phgdh
Kif5b
Kif3b
Epha7
Pdcd4
Mrc1
Pzp
Myh10
Mog
Npm1
Pcbp2
Pdpn
Pea15
Vcan
Plcg1
Pick1
Nsg1
Srsf2
Dlg4
Ptprr
Dag1
Sema4a
Sema4b
Sema3c
Dpysl3
Rpa2
Sema5a
Sptbn1
Syp
Taf6
Tgoln1
Trim28
Tsn
Tfrc
Snrnp70
Supt6h
Zpr1
Tpd52
Epha6
Sorbs1
Dbnl
Sh3gl1
Sh3gl2
Sh3gl3
Ndrg1
Vamp1
Eif4g2
Itga3
Zyx
Ppp3r1
Mapk3
Nup62
Omg
Cavin2
Mef2d
Kcnc3
Crk
Raly
Gdpd5
Spr
Maoa
Sf1
Ccn3
Cd34
Myo6
Syn2
Tbr1
Sqstm1
Isg15
Bcl2l1
Atp4a
Sord
Ca4
Ptprj
Gapdhs
Ptprd
Tpp2
Gk
Sdc3
Guk1
Gpd2
H2ac20
H2bc21
Stx3
Zrsr1
Vcl
Cr1l
Gart
Ptpmt1
Slc13a5
Grm7
Grm4
Cltc
Atg9a
Git1
Pkp4
Ahcyl2
Cntn4
Brsk2
Gba2
Prex1
Nlgn2
Myof
Pnkd
Myorg
Sv2c
Kazn
Thsd7a
Ehbp1
Swap70
Atrnl1
Cep170
Cdc5l
Rftn1
Usp7
Arhgap21
Nop58
Atp11b
Megf10
Smarca2
Scaf8
Lemd2
Slc25a23
A2m
Ralgapa1
Gpsm1
Cltb
Retreg2
Cpsf6
Dpp10
Asic1
Sec23ip
Eif4g1
Hdac4
Sri
Sez6l
Ppp4r3a
Nudt16
Snrnp200
Uggt1
Dgkq
Sepsecs
Pnlip
Snx6
Ano6
Nrxn3
Fkbp15
Oxsr1
Atl2
Bcr
Prmt8
Ptpn23
Lrpprc
Galnt2
Ttbk1
Mff
Rgma
Ppp2r5a
Smarcc2
Srsf1
Mylk
Rnf220
Ado
Abhd10
Rrm2b
Mapre3
Pik3c3
Nup98
Tra2a
Washc2
Dclk2
Erc2
Rab35
Cacna2d2
Sort1
Camk2d
Atp1a3
Atp1a2
Rhbdf1
Atp2b4
Ppp1r9b
Vkorc1l1
Myh14
Sdk2
Ranbp10
Wdfy3
Ntrk3
Dagla
Slc44a1
Tacc1
Sbf1
Ube2o
Pitpnm2
Zc3h4
Cnot1
Larp1
Acap2
Rps9
Ppp2r2b
Syne1
Rps27
Rpl35
Eif2s1
Akap9
Cmya5
Tm7sf2
Cspg5
Kyat3
Ppp2r1a
Slc39a4
Msrb2
Fbxo22
Eci3
Snd1
Dnajc15
Brd2
Picalm
Rtn4rl2
Opalin
Cyfip1
Plppr4
Syncrip
Tubb2a
Abcg2
Huwe1
Cpeb3
Luc7l2
Inpp5a
Igsf21
Dek
Robo2
Actn1
C2cd5
Mybbp1a
Lnpk
Igsf1
Tppp
Amph
Otub1
Map6
Sez6
Ube2q1
Pgm2
Galnt17
Elp1
Rragd
Ahcyl1
Mib1
Gabbr2
Lrfn2
Gramd1b
Cadps
Ppm1e
Zdhhc17
Cyld
Adgrl1
Adgrl3
Clasp1
Fnbp1
Dnajc6
Pja2
Madd
Rimbp2
Usp8
Plxna4
Septin9
Rab3gap1
Sass6
Naa15
Dgkz
Slc20a2
Pgrmc2
Fbxo2
Kcmf1
Bpnt2
Tdrkh
Epn1
Aldh3b1
Ppp1r10
Wipi2
Zmpste24
Ntaq1
Lrrc8a
Mtdh
Hapln4
Jph4
Ubap2l
Tmem106b
C2cd2l
Flnb
Lrrtm4
Eif4g3
Pip4k2b
Nucks1
Lrfn4
Llgl1
Ddhd2
Ddhd1
Cnksr2
F12
Tnc
Astn2
Negr1
Shank2
Adgrb3
Lrsam1
Ankfy1
Slitrk5
Slitrk1
Nfasc
Nrcam
Dlg1
Arhgap32
Pcyt1b
Pdk1
Wdr82
Pcid2
Entpd3
Pef1
Psmd11
Sv2b
Cpt1c
Reep1
Enpp6
Vipas39
Aars1
Ostm1
Flrt3
Ccny
Mief1
Slc5a7
Pck2
Mfsd8
C8b
Wasf2
ARK2N
Wdr48
Slc25a12
Gopc
F13a1
Atl1
Napepld
Echs1
Dtd2
Nrdc
Ppm1l
Ganab
Armcx3
Mia3
Cd99l2
Dock9
Chtf18
Anks1b
Dlgap2
Nup93
Chmp2b
Slc6a17
Sun2
Sgta
Tspan9
Eif2a
Csnk1a1
Rcc2
Ipo5
Ift74
Ptk7
Baiap2
Slc25a29
Unk
Ablim2
Eea1
Srsf7
Slc17a6
Nceh1
Cadm2
Slc9a7
Tars3
Olfm2
Cdadc1
Slc25a24
Cbln4
Dlat
Gga3
Lars1
Ckap4
Qars1
Acbd3
Hadha
Coq3
Ncs1
Acp6
Metap1
Rpl24
Daam1
Dmxl2
Lypd6
Sgsm1
Rgs7bp
Bicd1
Kirrel3
Tmtc3
Man2a2
Clasp2
Slc18a2
Pbrm1
Ppfia2
Cnot4
Ndrg4
Enpp4
Flna
Exosc6
Kyat1
Slc4a7
Iars1
Hook3
Slc24a2
Gphn
Ldah
Aph1a
Dpp9
Stx16
Jakmip1
Csnk1g2
Nudt9
Pomgnt2
Maob
Camk1d
Aldh5a1
Arrb1
Slc38a7
Ptges2
Pithd1
Acaa2
Dip2a
Rbbp5
Pgam5
Gemin5
Agap1
Pigt
Slc7a14
Osbpl6
Usp47
Slc44a2
Poglut1
Tnr
Nlgn3
Cadps2
Dnm3
Pgm5
Anapc2
Wwp1
Lrrc4c
Camkk2
Vps26b
Agps
Atg16l1
Paox
Sipa1l1
Lnpep
Slc39a6
Prepl
Cers6
Septin11
Shisa7
Gpr158
Pex5l
Inpp5k
Clmn
Septin10
Peli1
Vps52
Crbn
Trim9
Uba6
Myef2
Uba3
Scai
Ank2
Elfn1
Tmem163
Pde10a
Immt
Cnst
Ephb1
Rnf170
Abi1
Synpo
Vps53
Prpf31
Macroh2a2
Bcas3
Nemf
Pabpn1
Tab1
Sulf2
Nedd4l
Cdc34
C1ql2
H6pd
C1ra
Adprs
Akr7a2
Ppm1f
Slc43a2
Eprs1
Wdr47
Tcerg1
Lonp1
Gnal
Slc24a4
Calcoco1
Ogt
Trim32
Synj1
Rapgef2
Septin8
Mboat7
Pgp
Dpyd
Aldh4a1
Ngef
Epn2
Eif2b5
Bag5
Dis3l2
Ca12
Fermt2
Copa
Prmt5
Ppat
Pak2
Mical3
Crocc
Trip10
Stau2
Ago3
Ago2
Ago1
Plxnb1
Thtpa
Dner
Cdc73
Acad9
Afg3l2
Eif3b
Slc4a8
Lin7a
Slc25a1
Bdh2
Aldh1l2
Fnbp1l
Bclaf1
Scamp1
Trhde
Cyp51a1
Fgb
Meak7
Rtn4rl1
Unc13c
Dcun1d3
Cnot3
Fez1
Kiaa0319l
Pdxk
Cc2d1a
Stx5
Trnt1
Dnm1l
Pnpla8
Pnpt1
Adgrg1
Pacs1
Mmgt1
Sdha
Sirt5
Os9
Hacd3
Lsm14a
Manba
Agfg1
Slc38a1
Shtn1
Matr3
Lrrtm1
Plcl2
Mepce
Ahi1
Appl1
Irf2bpl
Stxbp5
[truncated: 2,334 more rows]
