# Supplementary material for: Astrocytic glycogen aggregates induce ATAD3A oligomerization mediated mitochondrial fragmentation and impede stroke recovery
Source: Research Square preprint supplement (doi:10.21203/rs.3.rs-6650856/v1), 2026-02-03
Supplement: Supplementary file 3 [file Supplementary table2.xlsx]

## Sheet: A2_vs_A1
	Glycogen_reactive_astrocyte_A2	Glycogen_reactive_astrocyte_A1
0	Gpc5	Rps15a
1	Gria2	Nme2
2	Kirrel3	Rplp2
3	Mertk	Rpsa
4	Gm20713	Myl6
5	Mdga2	Rpl27a
6	Grm3	Gm10076
7	Frmd4a	Rpl29
8	Lsamp	Rpl10a
9	Clmn	Prdx2
10	Rgs7	Rpl24
11	4930488L21Rik	Rps20
12	St6galnac5	Rps3
13	Vegfa	Tuba1a
14	Grin2c	Pebp1
15	Pde8b	Rpl15
16	Trpm3	Rps11
17	Cadm1	Rpl30
18	Gm3764	Rplp0
19	Dpf3	Rpl19
20	Slc7a10	Rps24
21	Lypd6	Rpl23
22	Gabbr2	Cd9
23	Kalrn	Rps9
24	Dock4	Rps16
25	Ctnnd2	Id3
26	Dgkb	S100a6
27	Gnao1	Rpl41
28	Grk3	Rps5
29	Rora	Vim
30	Ntm	Rps2
31	Pcdh7	Rpl11
32	Luzp2	Rps4x
33	Gli3	Tmsb4x
34	Mical2	Dbi
35	Kcnma1	Gfap
36	Mast4
37	Gm26843
38	Nwd1
39	Grid2

## Sheet: Glycogen_resting_vs_A2
	Glycogen_resting_astrocyte	Glycogen_reactive_astrocyte_A2
0	Erbb4	Glis3
1	Agt	Tenm3
2	Gria1	Garem1
3	Kcnd2	Id4
4	Slc6a11	Scara3
5	Fry	Wnk2
6	Itih3	Prdm16
7	Mgat4c	C030018K13Rik
8	Sparc	Hapln1
9	Trpm3	Dkk3
10	Slc6a9	Dcc
11	Adcy8	Oaf
12	B230323A14Rik	Chst2
13	Lrig1	Dennd1a
14	Srgap1	Lhx2
15	Spon1	Swap70
16	Lhfp	Magi3
17	Ptch1	Fam171b
18	Ntrk3	Rgs7
19	Plce1	Gm5089
20	Nav3	Emx2os
21	A330076C08Rik	Gfra1
22	Lrp1b	Rmst
23	5031439G07Rik	Mgll
24	Car10	Rgs20
25	Sfrp5	Ezr
26	Pde4d	Meis2
27	Itpkb	Sik3
28	Paqr6	Clmn
29	Dpp6	Fgf13
30	Igsf1	Pde8b
31	Nrxn3	Gpc6
32	Nnat	Lypd6
33	Sh3gl2	Mertk
34	Csmd3	Slco1c1
35	Chl1	Ptprt
36	Aldh1a1	Dab1
37	Cd38	Ephb1
38	Hr	Cadm1
39	Tafa1	Cspg5
40	Asap1	Gldc
41	Lgi1	Atp1b1
42	Marcks	4930488L21Rik
43	Nkx6-2	Grm3
44	Dab2	Adam23
45	Cit	St6galnac5
46	Nmnat2	Fam13c
47	Ppp1r14c	Tspan7
48	Gm33680	Dclk1
49	Arhgef28	Gnao1

## Sheet: Resting_astrocyte_vs_A1
	Resting_astrocyte	Glycogen_reactive_astrocyte_A1
0	Aplp1	Pebp1
1	Camk2n1	C4b
2	mt-Co3	Clic1
3	Cxcl14	Rpl10a
4	Glul	Tuba1a
5	Ndrg2	Igfbp5
6	Slc7a10	Id1
7	Smyd1	Lgals1
8	Selenop	Fxyd6
9	Slc6a11	Sorbs1
10	Kirrel2	Marcks
11	Tspan7	Gpx1
12	mt-Nd2	Rps2
13	Slc1a2	S100a11
14	Aldoc	Aqp4
15	2900052N01Rik	S100a10
16	Hsd11b1	Zbtb20
17	Hes5	Slc38a1
18	Mfge8	Fabp7
19	Luzp2	Rpl41
20	Sparcl1	Cnn3
21	Tshb	Dhrs1
22	Gabbr2	Crip2
23	Nrarp	Hspb8
24	Pygm	Fxyd1
25	Kcng4	Cd9
26	Atp1a3	S100a6
27	Phactr3	Vim
28	Nefm	Id3
29	Sntn	Gfap

## Sheet: Resting_astrocyte_vs_A2
	Resting_astrocyte	Glycogen_reactive_astrocyte_A2
0	Fth1	Nfia
1	Dbi	Dgkb
2	Ubb	Pbx1
3	Ckb	Magi2
4	Tmsb4x	Macf1
5	Ppia	Cadm1
6	Tpt1	Auts2
7	Cst3	Mertk
8	Mt3	Tnik
9	Sparc	Gm3764
10	Gapdh	Nlgn1
11	Ndrg2	Mdga2
12	Aldoc	Pcdh9
13	Eef1a1	B3galt1
14	Chchd2	Adgrb3
15	Mt1	Zbtb20
16	Cox8a	Gabrb1
17	Cox4i1	Dtna
18	Rplp1	Msi2
19	Rpl13	Npas3
20	Rpl9	Cadm2
21	Rps3a1	Frmd4a
22	Rpl19	Rora
23	Rps4x	Mir99ahg
24	Ptgds	Nrxn1
25	Rps8	Gpc5
26	Rps9	Ctnnd2
27	Rpl23	Ntm
28	Plp1	Malat1
29	Rps21	Lsamp

## Sheet: Resting_astrocyte_vs_Glycogen_r
	Resting_astrocyte	Glycogen_resting_astrocyte
0	Fth1	Syne1
1	Cst3	Mir100hg
2	Mt3	Pde4d
3	Tpt1	Frmd4a
4	Aldoc	Sox6
5	Ubb	Dmd
6	Eef1a1	Mgat4c
7	Gapdh	Lrig1
8	Ppia	Ank2
9	Actb	Nebl
10	Mt1	Grid2
11	Ftl1	Dock4
12	Tmsb4x	Slc6a11
13	Rpl13	Dtna
14	Rplp1	Trps1
15	Eif1	Ncam1
16	Chchd2	Rgs6
17	Cox8a	Zbtb20
18	Rpl9	Gria1
19	Rps14	Kirrel3
20	Rps3a1	Msi2
21	Ptgds	Magi2
22	Rps4x	Pcdh9
23	Rps8	Adgrl3
24	Rpl23	Slc4a4
25	Rpl19	Tnik
26	Rpl21	Gabrb1
27	Cfl1	Cadm2
28	Rps10	Mir99ahg
29	Lhx2	Macf1
30	Cspg5	Lrrc4c
31	Ezr	Lrp1b
32	Rps21	Nlgn1
33	Rps27a	Ctnnd2
34	Chst2	Plcb1
35	Rps24	Pitpnc1
36	Fau	Fry
37	Rpsa	Gm3764
38	Rps12	Rora
39	Rps3	Mdga2
40	Rplp0	Gpc5
41	Hopx	Erbb4
42	Fbxo2	Nrxn1
43	Atp1b1	Ntm
44	Nupr1	Adgrb3
45	Gfap	Lsamp
46	Vim	Kcnd2
47	C1qb	Malat1
48	Ifitm3	Npas3
49	Rbp1	Trpm3

## Sheet: Resting_c1_vs_Resting_c2
	Resting_astrocyte_c1	Resting_astrocyte_c2
0	Tmsb4x	Dio2
1	C1qb	Lix1
2	C1qa	Igfbp2
3	C1qc	Lhx2
4	Hexb	Chst2
5	Ctss	Nherf1
6	Fcer1g	Fam107a
7	Tyrobp	Pla2g7
8	Fau	Ddah1
9	Ly6a	Cxcl14
10	Ly6c1	Mt2
11	Ctsd	Tubb2b
12	Lgmn	Ezr
13	Trem2	Sdc4
14	Ly6e	Ptn
15	Rgs10	Gstm1
16	Hbb-bs	Gpm6a
17	Mbp	Scg3
18	Cldn5	Tspan7
19	Cyba	Cspg5
20	Sh3bgrl3	Clu
21	H2-D1	Prdx6
22	Lyz2	Slc1a2
23	Tmsb10	Sparcl1
24	Itm2a	Mt1
25	Ifitm3	Glul
26	Fcrls	Aldoc
27	Csf1r
28	Ly86
29	B2m
30	Laptm5
31	Olfml3
32	Mal
33	Cd52
34	Ctsh
35	Anxa3
36	Bin1
37	Arpc1b
38	Srgn
39	Pltp
40	Trf
41	Aif1
42	Hba-a1
43	Fcgr3
44	Spp1
45	Grn
