# Supplementary material for: Astrocytic glycogen aggregates induce ATAD3A oligomerization mediated mitochondrial fragmentation and impede stroke recovery
Source: Research Square preprint supplement (doi:10.21203/rs.3.rs-6650856/v1), 2026-02-03
Supplement: Supplementary file 4 [file Supplementary table3.xls]

## Sheet: Sheet2
Brain Bank ID	Time from onset to death	Gender	Age	RIN value / Frontal pole	RIN value / Gray matter	APOE Genotyping	Clinical Diagnosis	Pathological Diagnosis	Braak stages	Month of Death	Time of Death	Postmortem Interval （MIN）	BW(g）	CSF PH	Fresh Specimen Collection Record	Remarks
2016CBB020	CT 6 days before	male	76	-	-	-	Stroke, Intracerebral Hemorrhage (right temporal lobe and basal ganglia hemorrhage with intraventricular hemorrhage, right subdural hematoma; subfalcine herniation; sequelae of cerebral infarction).	PART(1,0); Intracerebral Hemorrhage (right temporal lobe, basal ganglia, and hippocampus); Cerebral Arteriolosclerosis, consistent with hypertensive changes.	1	7	1899-12-31 18:37:00	1170	1220	None	None
2019CBB053	CT 6 days before	male	75	9.3	7.4	E3	Stroke, Intracerebral Hemorrhage, Stage 3 Hypertension (very high-risk group), Cerebral Infarction, Diabetes Mellitus, Pulmonary Infection, Carotid Atherosclerosis with Plaque Formation, and Lower Extremity Atherosclerosis.	Intracerebral Hemorrhage; PART (1,0).	1	12	1899-12-31 03:58:00	842	1164.3	None	√	Ischemic injury and Hematoma are observed in the right temporal lobe, with bilateral ventricular hematomas and basilar artery sclerosis.
2022CBB008	CT 4 days before	male	58	7.1	6	E3	Stroke, Intracerebral Hemorrhage, Respiratory Failure, Sequelae of Cerebral Infarction, Motor Dysfunction of Lower Limbs, Functional Dysphagia, Symptomatic Epilepsy [Secondary Epilepsy], Urinary Incontinence, Coronary Atherosclerotic Heart Disease, Type 2 Diabetes Mellitus, Stage 3 Hypertension (Very High-Risk Group), Cervical Pain, Degenerative Cervical Spine Disease, Lumbar Pain, Degenerative L…	(Right) Widespread Multifocal Intracerebral Hemorrhage (frontal lobe, hippocampus, hypothalamus, basal ganglia, brainstem, cerebellum, and cervical spinal cord), accompanied by intraventricular hemorrhage.	0	2	1899-12-31 07:46:00	362	1201	6.96	√	Ischemic injury and Hematoma are present in the brainstem, cerebellum, and lateral ventricles, with a compressive hemorrhage disrupting the midbrain and severe arterial sclerosis.
2022CBB059	After being unconscious for half an hour, the patient was resuscitated and CT was not successful	male	88	7.8	6.1	E3	Stroke, Intracerebral Hemorrhage, Hypertension	Intracerebral Hemorrhage (right basal ganglia, right temporal lobe, and right thalamus); PART (1,0); Arteriolosclerosis; Basilar Artery Atherosclerosis; CAA2.	1	9	1899-12-31 14:11:00	239	1141	6.43	√	Arteriosclerosis with 9 hippocampal lesions/abnormalities
2024CBB066	The patient had a cerebral hemorrhage and died on the day of admission	male	82	-	-	-	Cardiopulmonary Arrest, Respiratory Failure, Circulatory Failure, Brain Herniation,Stroke, Intracerebral Hemorrhage, Secondary Intraventricular Hemorrhage, Hypertension, Renal Insufficiency, Personal History of Malignant Neoplasm of the Prostate (Postoperative), Personal History of Malignant Neoplasm of the Rectum (Postoperative).	AD Neuropathological Changes A1B2C0 (Thal Phase 1, Braak Stage 3); LATE Stage 2; Intracerebral Hemorrhage (basal ganglia, thalamus, midbrain); Encephalomalacia (basal ganglia; Lon white score 0).	3	10	1899-12-31 10:51:00	185	1177g (brain 1037g, midbrain and cerebellum 140g)	/	√	Massive intraventricular hemorrhage and ischemic injury with obscured anatomical boundaries of the pineal gland, habenular nuclei, superior/inferior colliculi, and pons.
2024CBB049	Acute cerebral infarction, died 11 days after admission.	male	90	-	-	-	1. Pulmonary infection 2. Respiratory failure 3. Respiratory cardiac arrest 4. Cerebral artery occlusion cerebral infarction 5. Atrial fibrillation [atrial fibrillation ]6. Cardiac insufficiency 7. Cerebral hernia 8. Cerebral hemorrhage 9. Internal carotid artery occlusion 10. Hypoalbuminemia 11. Hyperlipidemia 12. Electrolyte disorder 13. Right mediastinal lesion (nature to be discharged).		1	6	1899-12-31 17:53:00	265	1252g (brain 1095g, midbrain and cerebellum 157g)	6.85	√	Fresh samples were taken from the right brain (left lesion), the basilar artery was moderately hardened, and 1*2cm infarction was seen in the middle of the parietal lobe.
2021CBB059		male	58	7.8	7.8	E3	Diffuse Large B-cell Lymphoma	Neuropathological examination revealed no abnormalities	0	9	1899-12-31 23:38:00	1075	1396	6.66
2022CBB004		male	75	-	-	-	Hypertensive Heart Disease	PART(1,0) was positive for TDP43	1	1	1900-01-01	>480	/	None	None
2019CBB024		male	75	9.3	9.3	E3	Pulmonary aspergillosis, Atrial fibrillation ablation combined with left atrial appendage closure, Diabetes mellitus, Cardiac insufficiency, Dermatitis	PART (1,0)	1	7	1899-12-31 17:02:00	368	1176.2	6.5
2019CBB026		male	81	9.6	8.6	E2/E4	Acute renal failure, Obstructive nephropathy, Hyperkalemic lactic acid tumor, Bladder malignant tumor, bone malignant tumor, Septicemia, right nephrostomy in nephrostomy state	PART (1,0), encephalomalacia.	1	8	12:40	284	1228	6.24
2020CBB003		male	87	1.9	2.4	E3	Acute non-ST-segment elevation myocardial infarction, Acute left heart failure, Acute respiratory failure, Heart function class Ⅳ (Killip classification), Hypertension grade 3 very high risk, Type 2 diabetes mellitus, Acute renal failure, aspiration pneumonia, Hepatic insufficiency, paroxysmal atrial fibrillation, Compound ulcer, Multiple organ failure (heart and kidney respiratory)	PART(1,0)	1	1	1899-12-31 07:15:00	475	1149.2	6.72
