# Supplementary material for: Astrocytic glycogen aggregates induce ATAD3A oligomerization mediated mitochondrial fragmentation and impede stroke recovery
Source: Research Square preprint supplement (doi:10.21203/rs.3.rs-6650856/v1), 2026-02-03
Supplement: Supplementary file 5 [file Supplementary table4.xlsx]

## Sheet: Antibodies
Reagent	Vendor	Catalog number
Mouse monoclonal anti-Beta-Actin	Proteintech	Cat#66009-1-Ig	1:10000
Rabbit polyclonal anti-GAPDH	Proteintech	Cat#10494-1-AP	1:10000
Rabbit monoclonal anti-Myc-Tag	ABclonal	Cat#AE070	1:10000
Chicken polyclonal anti-GFAP	Abcam	Cat#ab4674	1:500
Rat monoclonal anti-GFAP	Abcam	Cat#ab279291	1:500
Goat Anti-Chicken IgY H&L (Alexa Fluor® 594)	Abcam	Cat#ab150172	1:200
Goat anti-Rat IgG (H+L) Cross-Adsorbed Secondary Antibody, Cyanine5	Thermo Fisher Scientific	Cat#A10525	1:200
Goat Anti-Rabbit IgG H&L (Alexa Fluor® 488)	Abcam	Cat#ab150077	1:200
Goat Anti-Rabbit IgG H&L (Alexa Fluor® 594)	Abcam	Cat#ab150080	1:200
Goat Anti-Rabbit IgG H&L (Alexa Fluor® 647)	Abcam	Cat#ab150079	1:200
Donkey Anti-Sheep IgG H+L(Alexa Fluor® 488)	jacksonimmuno	Cat#713-545-003	1:200
Goat anti-Chicken IgY (H+L) Secondary Antibody, Alexa	Thermo Fisher Scientific	Cat#24134	1:200
Goat anti-Rabbit IgG (H+L) Cross-Adsorbed Secondary Antibody, Alexa Fluor™ 750	Thermo Fisher Scientific	Cat#A-21039	1:200
Goat anti-Mouse IgG (H+L) Cross-Adsorbed Secondary Antibody, Alexa Fluor™ 750	Thermo Fisher Scientific	Cat#A-21037	1:200
Goat Anti-Mouse IgG H&L (Alexa Fluor® 488)	Abcam	Cat#ab150113	1:200
ATAD3A MaxPab rabbit polyclonal antibody (D01)	Abnova	Cat# H00055210-D01	1:4000
Rabbit polyclonal anti- MBP	Abcam	Cat# ab40390	1:4000
Mouse monoclonal anti-SMI 32	BioLegend	Cat# 801701	1:4000
Mouse monoclonal anti-Drp1	Santa Cruz	Cat# sc-271583	1:2000
Mouse monoclonal anti-HDAC3	Proteintech	Cat# 67151-1-Ig	1:4000
Rabbit polyclonal anti-HDAC3	Proteintech	Cat#10255-1-AP	1:4000
Mouse monoclonal anti-EPM2AIP1	Abnova	Cat#10R-6910	1:4000
Mouse monoclonal anti-STBD1	Proteintech	Cat# 67018-1-Ig	1:4000
Rabbit polyclonal anti-IgG	Proteintech	Cat#30000-0-AP	1:10000
Mouse polyclonal anti-IgG	Proteintech	Cat#B900620	1:10000
Rabbit monoclonal anti- Acetylated-Lysine	Sigma-Aldrich	Cat# SAB5600275	1:4000
Mouse monoclonal anti-Pan Acetylation	Proteintech	Cat# 66289-1-Ig	1:4000
Rabbit polyclonal anti-Acetylated-Lysine	Cell signaling Technology	Cat#9441S	1:4000
Mouse monoclonal anti-GFP-Tag	ABclonal	Cat#AE012	1:10000
Rabbit monoclonal anti-HA-Tag	Cell signaling Technology	Cat#AE012	1:10000
Rabbit polyclonal anti-His-Tag	Cell signaling Technology	Cat#2365T	1:10000
HRP-conjugated Streptavidin	Proteintech	Cat#SA00001-0	1:4000
Mouse monoclonal anti-Flag	Sigma-Aldrich	Cat#F3615	1:10000
Rabbitpolyclonalanti-phospho-Drp1(humanSer616/mouseSer579)	CellSignalingTechnology	Cat#3455	1:4000
Rabbit polyclonal anti-Phospho-DRP1 (Ser637) (humanSer637/mouseSer600)	Affbiotech	Cat#DF2980	1:4000
Rabbit polyclonal anti-GYS1	Solarbio	Cat#K003385P	1:4000
Mouse monoclonal anti-GYS1	Santa Cruz	Cat#sc-81173	1:4000
Mouse monoclonal anti-beta III Tubulin	servicebio	Cat#GB15139-100	1:4000
Sheep polyclonal anti- GFAP	Abcam	Cat#ab90601	1:500
Mouse monoclonal anti-HDAC6	Proteintech	Cat#67250-1-Ig	1:4000
Goat Anti-Mouse IgG, Peroxidase - Conjugated, H+L	Biosharp	Cat# BL001A	1:20000
Goat Anti-Rabbit IgG, Peroxidase Conjugated, H+L	Biosharp	Cat# BL003A	1:20000
Mouse monoclonal anti-ATAD3A	Santa Cruz	Cat#sc-376185	1:4000
Rabbit polyclonal anti-STBD1	Affinity	Cat#DF12326	1:200
Rabbit polyclonal anti-GBE1	Proteintech	Cat#20313-1-AP	1:200
Anti-Iba1 antibody	Abcam	Cat#ab5076	1:200
Anti-NeuN antibody	Abcam	Cat#ab104224	1:200

## Sheet: primers Information
Gene	Forward Primer(5'to3')	Reverse Primer(5'to3')
G6pc	CGACTCGCTATCTCCAAGTGA	GGGCGTTGTCCAAACAGAAT
PYGB	AGTGCCTGGGTATAAGAACAACA	CCCTCGAAGAAATTGTCATTGGG
PYGL	GTGTCCCAAGAGGGTGTATTACC	GGCATTTTGTAAGCCAAGGTTGA
SLC37A4	TTGGGGCTCATCACAAGCAG	CGCTCATCTGATCTGACAGAAC
AGL	AGATATACCTGGAGTGACGTTGG	CAGATTCCGGGTGTTCAAGGA
GSK3	GTCCGACTGCGGTATTTCTTC	CTCGATGGCAGATTCCAAAGG
GAA	AGCTACCCAAGCTACCGTCTA	GCGCTTACTAGCAGGATCTTTG
PHKA2	TCCTGTGTTACCAGAACCCA	CCCCAAACAGCCAATATGCT
PPP1CA	ATGTCCGACAGCGAGAAGC	ACAGCCGTAGAAGGTCATAGT
PPP1CB	CAGAAGTCCGAGGGTTGTGTA	CAGATGGTTTCCAAAGACTGCTT
PPP1C	TTTGTTTCTCGGGGACTATGTG	ATGGCTGCTATCGGCAAGC
PPP1R2	AGCCAAAGTATCGGACTCGG	TCGCTTCTTTTCTCGCTCCTC
GYS1	CAGCAAGGGTTGTAAGGTGTAT	GTACCCCGATGTTGCAGGT
GBE1	CCAGCGCAGGTATAAGAAGTTT	GCTCCCATTTTCCGTATTCCA
GAPDH	ATGGGGAAGGTGAAGGTCG	GGGGTCATTGATGGCAACAATA

## Sheet: oligonucleotides
Oligonucleotides	Primer(5'to3')
Human HDAC3 sg1	AAACTAATGCAGGACTAGGCTATGC
Human HDAC3 sg2	AAACTGGCGTATTTCTACGTACCCCC
Human HDAC6 sg1	AAACGCCCCAATCTAGCGGAGGTAC
Human HDAC6 sg2	AAACCAATCTAGCGGAGGTAAAGAC
Human ATAD3A sh	TGGACCATCTCATTGATGCGGT
humanEPM2AIP1 si1	GGGAUGACCUUGUGAGAGATT
humanEPM2AIP1 si2	GAGCAUGGUGAAAGGGUUATT
humanEPM2AIP1 si3	GGGCUUAGCUUGCAGAGAATT

## Sheet: Bacterial and virus strains 
Virus	Vendor	Catalog number
rAAV-CaMKIIa-hChR2(H134R)-EYFP-WPRE-hGH polyA	BrainVTA CO., Ltd	PT-0296
rAAV-CaMKIIa-GCaMP6s	BrainVTA CO., Ltd	PT-0110
rAAV-GFaABC1D-CRE-4x6T-PA	BrainVTA CO., Ltd	PT-13855
rAAV-CMV-DIO-(EGFP-U6)-shRNA(Hdac3)-WPRE-hGH polyA	BrainVTA CO., Ltd	PT-13961
rAAV-CMV-DIO-(EGFP-U6)-shRNA(scramble)-WPRE-hGH polyA	BrainVTA CO., Ltd	PT-2644
rAAV-CMV-ATAD3A（K134E）-3XFlag-WPRE-hGH pA	BrainVTA CO., Ltd	PT-14699
rAAV-CMV-3XFlag-WPRE-hGH pA	BrainVTA CO., Ltd	PT-3631
rAAV-CMV-DIO-EGFP-WPRE-hGH pA	BrainVTA CO., Ltd	PT-0310
rAAV-CMV-DIO-pygb-3XFlag-P2A-EGFP-WPREs	BrainVTA CO., Ltd	PT-14688
rAAV-CMV-DIO-EGFP-WPRE-hGH pA	BrainVTA CO., Ltd	PT-0310

## Sheet: Chemicals, peptides and regents
Products	Vendor	Catalog number
Tamoxifen	Struchem	Cat#SC-45564
RGFP966	Selleck	Cat# S7229
Cotadutide	Medchemexpress	Cat#HY-P2231
BDA-10,000	Thermo Fisher Scientific	Cat#D1956
Cy™3 Streptavidin Conjugate Options	Jacksonimmuno	Cat#016-160-084
Streptavidin Magnetic Beads	Beyotime	Cat#P2151
Collagenase IV	Biosharp	Cat#BS165
2,3,5-Triphenyltetrazolium chloride	BioFroxx	Cat#2273GR025
Rose Bengal sodium salt	Solarbio	Cat#G8540
Corn oil	Solarbio	Cat#C7030
TEMED	Adamas	Cat#01007685
Seahorse XF Basic medium	Agilent	Cat# 102353-100
Seahorse XF Calibrant Solution	Agilent	Cat# 100840-000
Bis-acrylamide	Servicebio	Cat#G2004
Mito-Tracker Red CMXRos	Thermo Fisher Scientific	Cat#M7512
Lipofectamine RNAiMAX	Thermo Fisher Scientific	Cat#13778150
D-Biotin	Beyotime	Cat# ST2051
Proteinase K	Beyotime	Cat#ST535
Protease Inhibitor Cocktail	MedChemExpress	Cat#HY-K0010
Protein A/G Agarose Resin	Yeasen	Cat#36403ES60
BMH	Thermo Fisher Scientific	Cat#22330
Glycogen	Sigma-Aldrich	Cat#9005-79-2
TRIzol reagent	Genesand	Cat#RE702
Hematoxylin	Biosharp	Cat#BL702B
Puromycin Dihydrochloride	Beyotime	Cat#P2151
O.C.T. Compound	Sakura	Cat#4583
Sudan Black B	MedChemExpress	Cat#HY-D0213
Normal donkey serum	Yeasen	Cat#36116ES03
Trichostatin A (TSA)	Targetmol	Cat#T6270
Nicotinamide (NAM)	Targetmol	Cat#T0934
D-Luciferin potassium salt (High Purity)	Beyotime	Cat#ST198
5 × siRNA buffer	Dharmacon	Cat# B-002000-UB-100
Gibco Opti-MEM	Thermo Fisher Scientific	Cat# 31985070
0.25% Trypsin-EDTA	Thermo Fisher Scientific	Cat# 25200072
Streptavidin Magnetic Beads	Beyotime	Cat# P2151
Coomassie Brilliant Blue Fast Staining Solution	Solarbio	Cat#P1300
Pierce™ Glutathione Agarose	Thermo Fisher Scientific	Cat#16101
Ni-NTA Agarose	QIAGEN	Cat#30210

## Sheet: Kits
Products	Vendor	Catalog number
Luxol Fast Blue Myelin Stain Kit	Solarbio	Cat#G3245
OxyBlot Protein Oxidation Detection Kit	Sigma Aldrich	Cat#S7150
VECTASTAIN ABC-HRP Kit, Peroxidase (Standard)	Vector laboratories	Cat#PK-4000
PAS Stain Kit	Solarbio	Cat#G1360
PAS staining	Biosharp	Cat#BL1120A
DAB Substrate Kit	Biosharp	Cat#BL732A
Adult Brain Dissociation Kit	Miltenyi	Cat#130-107-677
Anti-ACSA-2-MB Kit, mouse-Small Size	Miltenyi	Cat#130-097-679
GentleMACS 25 C Tubes	Miltenyi	Cat#130-093-237
GentleMACS™ Octo Dissociator with Heaters	Miltenyi	Cat#130-134-029
LS Column	Miltenyi	Cat#130-042-401
BCA Protein concentration Assay kit	Beyotime	Cat#P0012S
Glycogen Periodic Acid-Schiff Staining Kit	Biosharp	Cat#1120B
MidiMACS Separator	Miltenyi	Cat#130-042-302
GentleMACS 25 C Tubes	Miltenyi	Cat#130-093-237
GentleMACS™ Octo Dissociator with Heaters	Miltenyi	Cat#130-134-029
LS Column	Miltenyi	Cat#130-042-401
Duolink® PLA Kit	Sigma Aldrich	Cat#DUO82049-4L
Duolink® In Situ Red Kit	Sigma Aldrich	Cat#DUO92101-1KT
Multiplex Fluorescence Immunohistochemistry Detection Kit	FCMCS	Cat#MFS-mIHC004

## Sheet: Recombinant DNA
Products	Vendor	Catalog number
pLVX-sender-split-N-TurboID	Addgene plasmid	Cat#176651
pEnCMV-3×Myc-Clock(mouse)-SV40-Neo	Miaolin Biology	Cat#P28198
pCMV-SIRT1(mouse)-3×FLAG-Neo	Miaolin Biology	Cat#P44240
pCMV-SIRT6(mouse)-3×FLAG-Neo	Miaolin Biology	Cat#P38490
pEnCMV-Sirt7(mouse)-3×FLAG-SV40-Puro	Miaolin Biology	Cat#P30765
pCMV-KAT2B(mouse)-3×Linker-EGFP-SV40-Neo	Miaolin Biology	Cat#P24032
pCMV-SPORT6-Epm2aip1(mouse)	Miaolin Biology	Cat#P36120
pCMV-Sirt5(mouse)-3×FLAG-Neo	Miaolin Biology	Cat#P47757
GKX0075 CAS9-2xMCP-gRNA vector
pCMV-ATAD3A(human)-3×FLAG-Neo	Miaolin Biology	Cat#P46924
pOTB7-GYS1	Miaolin Biology	Cat#P15354
pDNR-LIB-STBD1	Miaolin Biology	Cat#P7857
pLV3-CMV-MCS-tdTomato	Miaolin Biology	Cat#P50400
pLVX-HDAC6-m-FLAG-Puro	Miaolin Biology	Cat#P10426
pCMV-HDAC8-FLAG-SV40-Neo	Miaolin Biology	Cat#P37989
pET-28a-ATAD3A	TsingkeBiotechnologyCo.,Ltd.
pGEX-4T-1-HDAC3	TsingkeBiotechnologyCo.,Ltd.
pGEX-4T-1-HDAC6	TsingkeBiotechnologyCo.,Ltd.
pGEX-4T-1-Kat8	TsingkeBiotechnologyCo.,Ltd.
pGEX-4T-1-Sirt1	TsingkeBiotechnologyCo.,Ltd.

## Sheet: Software and algorithms
Products	Vendor	Catalog number
GraphPad Prism version 8.0	GraphPad Software	https://www.graphpad.com/
ImageJ	National Institutes of Health	https://imagej.nih.gov/ij/
Adobe Illustrator	Adobe	https://www.adobe.com/products/illustrator/
IMARIS 9.6.2	Bitplane	https://imaris.oxinst.com/packages
MatlabR2020b	MathWorks	https://www.mathworks.com/products/new_products/release2020b.html
ZEN	Zeiss	https://www.zeiss.com/microscopy/us/products/microscope-software/zen-lite.html
Cell Ranger software
Python	Python Software Foundation	https://www.python.org/
Inper Studio	Inper	https://www.inper.com/
Inper Data Process	Inper	https://www.inper.com/
Mini Analysis Program 6.0
Axoclamp 700B	Molecular Devices, San Jose, CA
Digidata 1500B	Molecular Devices, San Jose, CA
Fear conditioning apparatus	ZS-KJ
EthoVision XT 14 software	Noldus, Wageningen, The Netherlands
